# Supplementary material for: The unmitigated profile of COVID-19 infectiousness
Source: eLife. 2022 Aug 1;11:e79134. doi: 10.7554/eLife.79134 (PMC9391043; doi:10.7554/eLife.79134)
Supplement: Supplementary file 1. [file elife-79134-supp1.csv]

infector_id	infector_age	infector_sex	infector_infection_lower	infector_infection_upper	infector_onset_lower	infector_onset_upper	infectee_id	infectee_age	infectee_sex	infectee_infection_lower	infectee_infection_upper	infectee_infectCity	infectee_onset_lower	infectee_onset_upper	isHousehold	data_source	URL	Reference	confidence	infector_reportCity	infector_infectCity	infector_returnDate_fromOtherCity	infector_isolateDate_beforeSymptom	infector_firstHospitalVisit	infector_isolateDate_afterSymptom	infector_labConfirmDate	infector_disclosureDate	infector_severity	infector_relation_to_infectee	infectee_reportCity	infectee_returnDate_fromOtherCity	infectee_isolateDate_beforeSymptom	infectee_firstHospitalVisit	infectee_isolateDate_afterSymptom	infectee_labConfirmDate	infectee_disclosureDate	infectee_severity	infectee_relation_to_infector
ah_suzhou-12	38	male			1/2/2020	1/2/2020	ah_suzhou-16	38	female			suzhou	1/2/2020	1/2/2020	yes	The People_ Government of Suzhou Municipality	http://www.ahsz.gov.cn	Ali		suzhou	wuhan, Hubei Province	23/01/2020	26/01/2020	1/2/2020	1/2/2020	3/2/2020	4/2/2020	mild	husband	suzhou	unknown	2/2/2020	4/2/2020	4/2/2020	6/2/2020	7/2/2020	mild	wife
ah_suzhou-15	40	male			29/01/2020	29/01/2020	ah_suzhou-17	39	female			suzhou	5/2/2020	5/2/2020	yes	The People_ Government of Suzhou Municipality	http://www.ahsz.gov.cn	Ali		suzhou	suzhou	unknown	unknown	3/2/2020	3/2/2020	5/2/2020	6/2/2020	mild	husband	suzhou	unknown	unknown	5/2/2020	5/2/2020	6/2/2020	7/2/2020	mild	wife
ah_suzhou-3	49	male			12/1/2020	12/1/2020	ah_suzhou-4	46	female			suzhou	15/01/2020	15/01/2020	yes	The People_ Government of Suzhou Municipality	http://www.ahsz.gov.cn	Ali		suzhou	wuhan, Hubei Province	12/1/2020	unknown	22/01/2020	22/01/2020	1/2/2020	2/2/2020	mild	husband	suzhou	unknown	unknown	22/01/2020	1/2/2020	1/2/2020	2/2/2020	mild	wife
ah_suzhou-40	35	male			26/01/2020	26/01/2020	ah_suzhou-5	34	female			suzhou	26/01/2020	26/01/2020	yes	The People_ Government of Suzhou Municipality	http://www.ahsz.gov.cn	Ali		suzhou	nanjing	16/01/2020	unknown	26/01/2020	26/01/2020	29/01/2020	30/01/2020	mild	husband	suzhou	unknown	unknown	29/01/2020	29/01/2020	2/2/2020	3/2/2020	mild	wife
anqing-21	25	male			23/01/2020	23/01/2020	anqing-22	50	female			anqing	24/01/2020	24/01/2020	yes	Anqing Municipal Health Commussion	Official Weibo of Anyang municipal People's government	Ali		anqing	wuhan, Hubei Province	19/01/2020	unknown	28/01/2020	unknown	30/01/2020	1/2/2020	mild	son	anqing	unknown	unknown	28/01/2020	unknown	31/01/2020	1/2/2020	mild	mother
anqing-21	25	male			23/01/2020	23/01/2020	anqing-23	53	male			anqing	26/01/2020	26/01/2020	yes	Anqing Municipal Health Commussion	Official Weibo of Anyang municipal People's government	Ali		anqing	wuhan, Hubei Province	19/01/2020	unknown	28/01/2020	unknown	30/01/2020	1/2/2020	mild	son	anqing	unknown	unknown	28/01/2020	unknown	31/01/2020	1/2/2020	mild	father
anqing-59	57	male			27/01/2020	27/01/2020	anqing-60	55	female			anqing	30/01/2020	30/01/2020	yes	Anqing Municipal Health Commussion	Official Weibo of Anyang municipal People's government	Ali		anqing	anqing	unknown	unknown	28/01/2020	5/2/2020	6/2/2020	7/2/2020	mild	husband	anqing	unknown	unknown	30/01/2020	5/2/2020	6/2/2020	7/2/2020	mild	wife
anshan-2	71	female			31/01/2020	31/01/2020	anshan-3	73	male			anshan	1/2/2020	1/2/2020	yes	Anshan Municipal Health Commussion	http://wjw.anshan.gov.cn/index.aspx	Ali		anshan	anshan	local	unknown	4/2/2020	4/2/2020	6/2/2020	6/2/2020	mild	wife	anshan	local	unknown	4/2/2020	5/2/2020	6/2/2020	6/2/2020	mild	husband
anyang-1	45	male			23/01/2020	23/01/2020	anyang-40	42	female			anyang	26/01/2020	26/01/2020	yes	Official Weibo of Anyang municipal People's government	https://weibo.com/ayxww	Ali		anyang	anyang	unknown	23/01/2020	23/01/2020	26/01/2020	26/01/2020	27/01/2020	unknown	husband	anyang	unknown	unknown	27/01/2020	26/01/2020	27/01/2020	28/01/2020	unknown	wife
baoji-2	46	female			18/01/2020	18/01/2020	baoji-3	50	male			baoji	22/01/2020	22/01/2020	yes	Baoji Municipal Health Commussion	http://wjw.baoji.gov.cn	Ali		baoji	baoji	local	unknown	18/01/2020	28/01/2020	28/01/2020	28/01/2020	mild	wife	baoji	local	unknown	25/01/2020	28/01/2020	28/01/2020	28/01/2020	mild	husband
baoji-4	46	male			21/01/2020	21/01/2020	baoji-6	43	female			wuhan, Hubei Province	27/01/2020	27/01/2020	yes	Baoji Municipal Health Commussion	http://wjw.baoji.gov.cn	Ali		baoji	wuhan, Hubei Province	13/01/2020	unknown	22/01/2020	29/01/2020	29/01/2020	29/01/2020	mild	husband	baoji	local	unknown	29/01/2020	1/2/2020	1/2/2020	1/2/2020	mild	wife
beihai-11	31	female			23/01/2020	23/01/2020	beihai-17	2	male			wuhan, Hubei Province	31/01/2020	31/01/2020	yes	Beihai Municipal Health Commussion	http://xxgk.beihai.gov.cn/bhswshjhsywyh/#.airline	Ali		beihai	wuhan, Hubei Province	20/01/2020	unknown	23/01/2020	23/01/2020	30/01/2020	1/2/2020	mild	mother	beihai	20/01/2020	unknown	31/01/2020	31/01/2020	2/2/2020	3/2/2020	mild	son
beihai-16	29	female			25/01/2020	25/01/2020	beihai-22	53	female			beihai	29/01/2020	29/01/2020	yes	Beihai Municipal Health Commussion	http://xxgk.beihai.gov.cn/bhswshjhsywyh/#.airline	Ali		beihai	beihai	unknown	unknown	31/01/2020	31/01/2020	2/2/2020	3/2/2020	mild	daughter	beihai	unknown	unknown	3/2/2020	3/2/2020	5/2/2020	6/2/2020	mild	mother
beihai-11	31	female			23/01/2020	23/01/2020	beihai-15	31	male			wuhan, Hubei Province	26/01/2020	26/01/2020	yes	Beihai Municipal Health Commussion	http://xxgk.beihai.gov.cn/bhswshjhsywyh/#.airline	Ali		beihai	wuhan, Hubei Province	20/01/2020	unknown	23/01/2020	23/01/2020	30/01/2020	1/2/2020	mild	wife	beihai	20/01/2020	unknown	26/01/2020	31/01/2020	31/01/2020	3/2/2020	mild	husband
beihai-19	43	male			24/01/2020	24/01/2020	beihai-24	15	female			wuhan, Hubei Province	6/2/2020	6/2/2020	yes	Beihai Municipal Health Commussion	http://xxgk.beihai.gov.cn/bhswshjhsywyh/#.airline	Ali		beihai	wuhan, Hubei Province	22/01/2020	unknown	2/2/2020	2/2/2020	4/2/2020	5/2/2020	mild	father	beihai	24/01/2020	4/2/2020	7/2/2020	7/2/2020	8/2/2020	9/2/2020	mild	daughter
beihai-5	41	female			20/01/2020	20/01/2020	beihai-18	43	male			wuhan, Hubei Province	30/01/2020	30/01/2020	yes	Beihai Municipal Health Commussion	http://xxgk.beihai.gov.cn/bhswshjhsywyh/#.airline	Ali		beihai	wuhan, Hubei Province	20/01/2020	unknown	28/01/2020	28/01/2020	29/01/2020	30/01/2020	mild	wife	beihai	20/01/2020	29/01/2020	30/01/2020	30/01/2020	3/2/2020	5/2/2020	mild	husband
bengbu-132	68	female			22/01/2020	22/01/2020	bengbu-97	68	male			bangbu	3/2/2020	3/2/2020	yes	The People_ Government of Bengbu Municipality	http://www.bengbu.gov.cn	Ali		bengbu	bengbu	unknown	unknown	1/2/2020	5/2/2020	5/2/2020	6/2/2020	mild	wife	bangbu	unknown	unknown	8/2/2020	unknown	11/2/2020	12/2/2020	mild	husband
bengbu-134	83	female			26/01/2020	26/01/2020	bengbu-144	53	female			bangbu	30/01/2020	30/01/2020	yes	The People_ Government of Bengbu Municipality	http://www.bengbu.gov.cn	Ali		bengbu	bengbu	unknown	unknown	30/01/2020	5/2/2020	5/2/2020	6/2/2020	mild	mother	bangbu	unknown	unknown	5/2/2020	6/2/2020	6/2/2020	7/2/2020	mild	daughter
bengbu-145	51	male			3/2/2020	3/2/2020	bengbu-146	83	female			bangbu	3/2/2020	3/2/2020	yes	The People_ Government of Bengbu Municipality	http://www.bengbu.gov.cn	Ali		bengbu	linhai	17/01/2020	unknown	3/2/2020	6/2/2020	6/2/2020	7/2/2020	mild	son	bangbu	unknown	unknown	3/2/2020	6/2/2020	6/2/2020	7/2/2020	mild	mother
bengbu-34	50	female			28/01/2020	28/01/2020	bengbu-103	21	male			bangbu	6/2/2020	6/2/2020	yes	The People_ Government of Bengbu Municipality	http://www.bengbu.gov.cn	Ali		bengbu	bengbu	unknown	unknown	28/01/2020	unknown	2/2/2020	3/2/2020	mild	mother	bangbu	unknown	unknown	7/2/2020	unknown	12/2/2020	13/02/2020	mild	son
bengbu-58	49	male			30/01/2020	30/01/2020	bengbu-109	49	female			bangbu	9/2/2020	9/2/2020	yes	The People_ Government of Bengbu Municipality	http://www.bengbu.gov.cn	Ali		bengbu	bengbu	unknown	unknown	3/2/2020	unknown	7/2/2020	8/2/2020	mild	husband	bangbu	unknown	unknown	9/2/2020	unknown	13/02/2020	14/02/2020	mild	wife
bengbu-62	28	female			5/2/2020	5/2/2020	bengbu-80	2	female			bangbu	28/02/2020	28/02/2020	yes	The People_ Government of Bengbu Municipality	http://www.bengbu.gov.cn	Ali		bengbu	bengbu	unknown	unknown	5/2/2020	unknown	8/2/2020	9/2/2020	mild	mother	bangbu	unknown	unknown	28/01/2020	unknown	9/2/2020	10/2/2020	mild	daughter
bengbu-64	66	female			6/2/2020	6/2/2020	bengbu-118	70	male			bangbu	13/02/2020	13/02/2020	yes	The People_ Government of Bengbu Municipality	http://www.bengbu.gov.cn	Ali		bengbu	bengbu	unknown	unknown	6/2/2020	unknown	8/2/2020	9/2/2020	mild	wife	bangbu	unknown	unknown	13/02/2020	unknown	16/02/2020	17/02/2020	mild	husband
bengbu-66	55	male			31/01/2020	31/01/2020	bengbu-79	55	female			bangbu	6/2/2020	6/2/2020	yes	The People_ Government of Bengbu Municipality	http://www.bengbu.gov.cn	Ali		bengbu	bengbu	unknown	unknown	3/2/2020	unknown	8/2/2020	9/2/2020	mild	husband	bangbu	unknown	unknown	6/2/2020	unknown	9/2/2020	10/2/2020	mild	wife
bengbu-67	59	male			29/01/2020	29/01/2020	bengbu-75	25	male			bangbu	5/2/2020	5/2/2020	yes	The People_ Government of Bengbu Municipality	http://www.bengbu.gov.cn	Ali		bengbu	bengbu	unknown	unknown	2/2/2020	unknown	8/2/2020	9/2/2020	mild	father	bangbu	unknown	unknown	5/2/2020	unknown	8/2/2020	9/2/2020	mild	son
bengbu-71	82	female			24/01/2020	24/01/2020	bengbu-85	58	male			bangbu	4/2/2020	4/2/2020	yes	The People_ Government of Bengbu Municipality	http://www.bengbu.gov.cn	Ali		bengbu	bengbu	unknown	unknown	6/2/2020	unknown	8/2/2020	9/2/2020	mild	mother-in-law	bangbu	unknown	unknown	4/2/2020	unknown	9/2/2020	10/2/2020	mild	son-in-law
binzhou-11	49	female			27/01/2020	27/01/2020	binzhou-12	46	male			binzhou	29/01/2020	29/01/2020	yes	Binzhou Municipal Health Commussion	http://wjw.binzhou.gov.cn/zhengwu/class/	Ali		binzhou	binzhou	unknown	unknown	8/2/2020	8/2/2020	11/2/2020	12/2/2020	mild	wife	binzhou	unknown	unknown	unknown	13/02/2020	13/02/2020	14/02/2020	mild	husband
binzhou-11	49	female			27/01/2020	27/01/2020	binzhou-15	27	male			binzhou	11/2/2020	11/2/2020	yes	Binzhou Municipal Health Commussion	http://wjw.binzhou.gov.cn/zhengwu/class/	Ali		binzhou	binzhou	unknown	unknown	8/2/2020	8/2/2020	11/2/2020	12/2/2020	mild	mother	binzhou	22/01/2020	11/2/2020	13/02/2020	13/02/2020	13/02/2020	14/02/2020	mild	son
cangzhou-1	80	male			9/1/2020	9/1/2020	cangzhou-10	41	male			cangzhou	23/01/2020	23/01/2020	yes	The People_ Government of Cangzhou Municipality	http://www.cangzhou.gov.cn	Ali		cangzhou	wuhan, Hubei Province	unknown	unknown	13/01/2020	16/01/2020	22/01/2020	22/01/2020	death	father	cangzhou	local	24/01/2020	24/01/2020	28/01/2020	28/01/2020	28/01/2020	unknown	son
cangzhou-13	29	female			23/01/2020	23/01/2020	cangzhou-14	85	female			cangzhou	28/01/2020	28/01/2020	yes	The People_ Government of Cangzhou Municipality	http://www.cangzhou.gov.cn	Ali		cangzhou	wuhan, Hubei Province	19/01/2020	unknown	27/01/2020	30/01/2020	30/01/2020	30/01/2020	unknown	grandaughter	cangzhou	local	28/01/2020	28/01/2020	30/01/2020	30/01/2020	30/01/2020	unknown	grandmother
changchun-10	unknown	male			29/01/2020	29/01/2020	changchun-11	unknown	female			changchun	29/01/2020	29/01/2020	yes	Changchun Municipal Health Commussion	http://wjw.changchun.gov.cn	Ali		changchun	wuhan, Hubei Province	20/01/2020	unknown	30/01/2020	30/01/2020	2/2/2020	2/2/2020	unknown	father	changchun	unknown	unknown	30/01/2020	30/01/2020	2/2/2020	2/2/2020	unknown	daughter
changchun-9	unknown	female			25/01/2020	25/01/2020	changchun-10	unknown	male			wuhan, Hubei Province	29/01/2020	29/01/2020	yes	Changchun Municipal Health Commussion	http://wjw.changchun.gov.cn	Ali		changchun	wuhan, Hubei Province	20/01/2020	unknown	30/01/2020	30/01/2020	2/2/2020	2/2/2020	unknown	wife	changchun	20/01/2020	unknown	30/01/2020	30/01/2020	2/2/2020	2/2/2020	unknown	husband
changde-14	51	male			21/01/2020	21/01/2020	changde-15	48	female			changde	24/01/2020	24/01/2020	yes	Changde Municipal Health Commussion	http://wjw.changde.gov.cn	Ali		changde	changde	local	unknown	26/01/2020	28/01/2020	28/01/2020	29/01/2020	unknown	husband	changde	local	unknown	26/01/2020	28/01/2020	28/01/2020	29/01/2020	unknown	wife
changde-22	51	male			24/01/2020	24/01/2020	changde-23	51	female			wuhan, Hubei Province	22/01/2020	22/01/2020	yes	Changde Municipal Health Commussion	http://wjw.changde.gov.cn	Ali		changde	wuhan, Hubei Province	22/01/2020	unknown	28/01/2020	29/01/2020	29/01/2020	30/01/2020	unknown	husband	changde	22/01/2020	unknown	28/01/2020	29/01/2020	29/01/2020	30/01/2020	unknown	wife
changde-46	56	male			2/2/2020	2/2/2020	changde-47	76	female			changde	2/2/2020	2/2/2020	yes	Changde Municipal Health Commussion	http://wjw.changde.gov.cn	Ali		changde	changde	unknown	unknown	5/2/2020	6/2/2020	6/2/2020	7/2/2020	unknown	son	changde	local	unknown	5/2/2020	6/2/2020	6/2/2020	7/2/2020	unknown	mother
changde-52	60	male			23/01/2020	23/01/2020	changde-70	27	female			changde	14/02/2020	14/02/2020	yes	Changde Municipal Health Commussion	http://wjw.changde.gov.cn	Ali		changde	changde	local	unknown	5/2/2020	5/2/2020	5/2/2020	6/2/2020	unknown	father-in-law	changde	local	unknown	14/02/2020	15/02/2020	15/02/2020	16/02/2020	unknown	daughter-in-law
chizhou-16	55	male			27/01/2020	27/01/2020	chizhou-10	53	female			chizhou	5/2/2020	5/2/2020	yes	The People_ Government of Chizhou Municipality	http://www.chizhou.gov.cn	Ali		chizhou	chizhou	unknown	unknown	1/2/2020	27/01/2020	3/2/2020	4/2/2020	mild	husband	chizhou	unknown	unknown	6/2/2020	9/2/2020	9/2/2020	10/2/2020	mild	wife
dalian-2	37	male			16/01/2020	16/01/2020	dalian-12	63	female			dalian	30/01/2020	30/01/2020	yes	Dalian Municipal Health Commussion	http://hcod.dl.gov.cn/web/guest	Ali		dalian	wuhan, Hubei Province	20/01/2020	unknown	23/01/2020	23/01/2020	unknown	26/01/2020	mild	son	dalian	local	unknown	30/01/2020	30/01/2020	2/2/2020	4/2/2020	mild	mother
dalian-3	46	male			11/1/2020	11/1/2020	dalian-5	78	female			dalian	24/01/2020	24/01/2020	yes	Dalian Municipal Health Commussion	http://hcod.dl.gov.cn/web/guest	Ali		dalian	wuhan, Hubei Province	9/1/2020	unknown	24/01/2020	24/01/2020	unknown	26/01/2020	severe	son	dalian	local	unknown	26/01/2020	26/01/2020	unknown	27/01/2020	severe	mother
daqing-1	unknown	female			18/01/2020	18/01/2020	daqing-4	unknown	male			wuhan, Hubei Province	20/01/2020	20/01/2020	yes	Daqing Municipal People's Government	http://www.daqing.gov.cn/	Ali		daqing	wuhan, Hubei Province	14/01/2020	unknown	22/01/2020	22/01/2020	23/01/2020	5/2/2020	unknown	wife	daqing	14/01/2020	unknown	22/01/2020	22/01/2020	26/01/2020	5/2/2020	unknown	husband
daqing-1	unknown	female			18/01/2020	18/01/2020	daqing-5	unknown	female			daqing	27/01/2020	27/01/2020	yes	Daqing Municipal People's Government	http://www.daqing.gov.cn/	Ali		daqing	wuhan, Hubei Province	14/01/2020	unknown	22/01/2020	22/01/2020	23/01/2020	5/2/2020	unknown	mother	daqing	local	22/01/2020	22/01/2020	31/01/2020	31/01/2020	5/2/2020	unknown	daughter
daqing-1	unknown	female			18/01/2020	18/01/2020	daqing-6	unknown	male			daqing	29/01/2020	29/01/2020	yes	Daqing Municipal People's Government	http://www.daqing.gov.cn/	Ali		daqing	wuhan, Hubei Province	14/01/2020	unknown	22/01/2020	22/01/2020	23/01/2020	5/2/2020	unknown	mother-in-law	daqing	local	22/01/2020	29/01/2020	29/01/2020	2/2/2020	5/2/2020	unknown	son-in-law
daqing-4	unknown	male			20/01/2020	20/01/2020	daqing-2	unknown	female			daqing	18/01/2020	18/01/2020	yes	Daqing Municipal People's Government	http://www.daqing.gov.cn/	Ali		daqing	wuhan, Hubei Province	14/01/2020	unknown	22/01/2020	22/01/2020	26/01/2020	5/2/2020	unknown	mother	daqing	local	unknown	22/01/2020	22/01/2020	25/01/2020	5/2/2020	unknown	daughter
daqing-7	unknown	unknown			23/01/2020	23/01/2020	daqing-8	unknown	female			daqing	28/01/2020	28/01/2020	yes	Daqing Municipal People's Government	http://www.daqing.gov.cn/	Ali		daqing	wuhan, Hubei Province	21/01/2020	24/01/2020	24/01/2020	28/01/2020	30/01/2020	5/2/2020	unknown	son	daqing	local	unknown	28/01/2020	28/01/2020	30/01/2020	5/2/2020	unknown	mother
daqing-7	unknown	unknown			23/01/2020	23/01/2020	daqing-9	unknown	male			daqing	30/01/2020	30/01/2020	yes	Daqing Municipal People's Government	http://www.daqing.gov.cn/	Ali		daqing	wuhan, Hubei Province	21/01/2020	24/01/2020	24/01/2020	28/01/2020	30/01/2020	5/2/2020	unknown	son	daqing	local	unknown	30/01/2020	30/01/2020	2/2/2020	5/2/2020	unknown	father
deyang-10	29	female			31/01/2020	31/01/2020	deyang-13	31	male			jingzhou, Hubei Province	7/2/2020	7/2/2020	yes	Deyang Municipal Health Commussion	https://wjw.deyang.gov.cn/	Ali		deyang	jingzhou, Hubei Province	12/1/2020	unknown	31/01/2020	unknown	unknown	2/2/2020	unknown	wife	deyang	12/1/2020	2/2/2020	7/2/2020	7/2/2020	7/2/2020	8/2/2020	unknown	husband
deyang-2	47	female			27/01/2020	27/01/2020	deyang-6	47	male			deyang	29/01/2020	29/01/2020	yes	Deyang Municipal Health Commussion	https://wjw.deyang.gov.cn/	Ali		deyang	wuhan, Hubei Province	20/01/2020	unknown	27/01/2020	27/01/2020	28/01/2020	29/01/2020	unknown	wife	deyang	unknown	29/01/2020	30/01/2020	30/01/2020	30/01/2020	31/01/2020	unknown	husband
deyang-2	47	female			27/01/2020	27/01/2020	deyang-9	66	female			deyang	31/01/2020	31/01/2020	yes	Deyang Municipal Health Commussion	https://wjw.deyang.gov.cn/	Ali		deyang	wuhan, Hubei Province	20/01/2020	unknown	27/01/2020	27/01/2020	28/01/2020	29/01/2020	unknown	daughter	deyang	unknown	unknown	31/01/2020	31/01/2020	unknown	2/2/2020	unknown	mother
fuyang-101	44	male			30/01/2020	30/01/2020	fuyang-116	38	female			xian	3/2/2020	3/2/2020	yes	Fuyang Municipal Health Commussion	http://wjw.fy.gov.cn/	Ali		fuyang	xian	23/01/2020	unknown	6/2/2020	10/2/2020	11/2/2020	12/2/2020	mild	husband	fuyang	23/01/2020	unknown	6/2/2020	10/2/2020	14/02/2020	15/02/2020	mild	wife
fuyang-101	44	male			30/01/2020	30/01/2020	fuyang-89	69	male			fuyang	30/01/2020	30/01/2020	yes	Fuyang Municipal Health Commussion	http://wjw.fy.gov.cn/	Ali		fuyang	xian	23/01/2020	unknown	6/2/2020	10/2/2020	11/2/2020	12/2/2020	mild	son	fuyang	unknown	unknown	6/2/2020	7/2/2020	9/2/2020	10/2/2020	mild	father
fuyang-111	39	male			11/2/2020	11/2/2020	fuyang-109	63	male			fuyang	7/2/2020	7/2/2020	yes	Fuyang Municipal Health Commussion	http://wjw.fy.gov.cn/	Ali		fuyang	wuhan, Hubei Province	23/01/2020	unknown	12/1/2020	13/02/2020	13/02/2020	14/02/2020	mild	son	fuyang	unknown	unknown	10/2/2020	11/2/2020	12/2/2020	13/02/2020	mild	father
fuyang-118	48	male			6/2/2020	6/2/2020	fuyang-119	6	male			fuyang	13/02/2020	13/02/2020	yes	Fuyang Municipal Health Commussion	http://wjw.fy.gov.cn/	Ali		fuyang	fuyang	unknown	unknown	12/2/2020	12/2/2020	15/02/2020	16/02/2020	mild	gandfather	fuyang	unknown	12/2/2020	14/02/2020	14/02/2020	15/02/2020	16/02/2020	mild	grandson
fuyang-130	48	male			13/01/2020	13/01/2020	fuyang-132	49	female			fuyang	21/01/2020	21/01/2020	yes	Fuyang Municipal Health Commussion	http://wjw.fy.gov.cn/	Ali		fuyang	wuhan, Hubei Province	10/1/2020	unknown	24/01/2020	27/01/2020	27/01/2020	28/01/2020	mild	husband	fuyang	unknown	unknown	24/01/2020	27/01/2020	27/01/2020	28/01/2020	mild	wife
fuyang-138	39	female			17/01/2020	17/01/2020	fuyang-21	39	male			fuyang	28/01/2020	28/01/2020	yes	Fuyang Municipal Health Commussion	http://wjw.fy.gov.cn/	Ali		fuyang	wuhan, Hubei Province	12/1/2020	unknown	24/01/2020	27/01/2020	27/01/2020	28/01/2020	mild	wife	fuyang	unknown	unknown	29/01/2020	29/01/2020	31/01/2020	1/2/2020	mild	husband
fuyang-146	63	female			27/01/2020	27/01/2020	fuyang-147	8	male			fuyang	1/2/2020	1/2/2020	yes	Fuyang Municipal Health Commussion	http://wjw.fy.gov.cn/	Ali		fuyang	fuyang	unknown	unknown	4/2/2020	4/2/2020	6/2/2020	7/2/2020	mild	grandmother	fuyang	unknown	unknown	4/2/2020	4/2/2020	6/2/2020	7/2/2020	mild	granddaughter
fuyang-15	44	male			20/01/2020	20/01/2020	fuyang-28	45	female			fuyang	26/01/2020	26/01/2020	yes	Fuyang Municipal Health Commussion	http://wjw.fy.gov.cn/	Ali		fuyang	fuyang	unknown	unknown	28/01/2020	29/01/2020	30/01/2020	31/01/2020	mild	husband	fuyang	unknown	unknown	30/01/2020	1/2/2020	1/2/2020	2/2/2020	mild	wife
fuyang-15	44	male			20/01/2020	20/01/2020	fuyang-29	20	female			fuyang	25/01/2020	25/01/2020	yes	Fuyang Municipal Health Commussion	http://wjw.fy.gov.cn/	Ali		fuyang	fuyang	unknown	unknown	28/01/2020	29/01/2020	30/01/2020	31/01/2020	mild	father	fuyang	unknown	unknown	30/01/2020	1/2/2020	1/2/2020	2/2/2020	mild	daughter
fuyang-17	49	female			27/01/2020	27/01/2020	fuyang-39	21	female			fuyang	30/01/2020	30/01/2020	yes	Fuyang Municipal Health Commussion	http://wjw.fy.gov.cn/	Ali		fuyang	wuhan, Hubei Province	21/01/2020	unknown	27/01/2020	29/01/2020	31/01/2020	1/2/2020	mild	mother	fuyang	unknown	unknown	31/01/2020	31/01/2020	1/2/2020	3/2/2020	mild	daughter
fuyang-17	49	female			27/01/2020	27/01/2020	fuyang-49	14	female			fuyang	26/01/2020	26/01/2020	yes	Fuyang Municipal Health Commussion	http://wjw.fy.gov.cn/	Ali		fuyang	wuhan, Hubei Province	21/01/2020	unknown	27/01/2020	29/01/2020	31/01/2020	1/2/2020	mild	mother	fuyang	unknown	unknown	27/01/2020	29/01/2020	3/2/2020	4/2/2020	mild	daughter
fuyang-18	48	male			26/01/2020	26/01/2020	fuyang-17	49	female			wuhan, Hubei Province	27/01/2020	27/01/2020	yes	Fuyang Municipal Health Commussion	http://wjw.fy.gov.cn/	Ali		fuyang	wuhan, Hubei Province	21/01/2020	unknown	27/01/2020	29/01/2020	31/01/2020	1/2/2020	mild	husband	fuyang	21/01/2020	unknown	27/01/2020	29/01/2020	31/01/2020	1/2/2020	mild	wife
fuyang-31	47	male			28/01/2020	28/01/2020	fuyang-53	41	female			wuhan, Hubei Province	1/2/2020	1/2/2020	yes	Fuyang Municipal Health Commussion	http://wjw.fy.gov.cn/	Ali		fuyang	wuhan, Hubei Province	22/01/2020	unknown	30/01/2020	1/2/2020	1/2/2020	2/2/2020	mild	husband	fuyang	22/01/2020	unknown	1/2/2020	2/2/2020	3/2/2020	4/2/2020	mild	wife
fuyang-31	47	male			28/01/2020	28/01/2020	fuyang-54	1	female			wuhan, Hubei Province	1/2/2020	1/2/2020	yes	Fuyang Municipal Health Commussion	http://wjw.fy.gov.cn/	Ali		fuyang	wuhan, Hubei Province	22/01/2020	unknown	30/01/2020	1/2/2020	1/2/2020	2/2/2020	mild	father	fuyang	22/01/2020	unknown	1/2/2020	2/2/2020	3/2/2020	4/2/2020	mild	daughter
fuyang-32	31	female			20/01/2020	20/01/2020	fuyang-47	30	male			fuyang	26/01/2020	26/01/2020	yes	Fuyang Municipal Health Commussion	http://wjw.fy.gov.cn/	Ali		fuyang	wuhan, Hubei Province	21/01/2020	unknown	30/01/2020	30/01/2020	1/2/2020	2/2/2020	mild	wife	fuyang	21/01/2020	unknown	30/01/2020	30/01/2020	3/2/2020	4/2/2020	mild	husband
fuyang-55	49	male			28/01/2020	28/01/2020	fuyang-56	47	female			fuyang	25/01/2020	25/01/2020	yes	Fuyang Municipal Health Commussion	http://wjw.fy.gov.cn/	Ali		fuyang	hangzhou	19/01/2020	unknown	1/2/2020	1/2/2020	3/2/2020	4/2/2020	mild	husband	fuyang	unknown	unknown	1/2/2020	1/2/2020	3/2/2020	4/2/2020	mild	wife
fuyang-58	27	male			23/01/2020	23/01/2020	fuyang-151	48	male			fuyang	31/01/2020	31/01/2020	yes	Fuyang Municipal Health Commussion	http://wjw.fy.gov.cn/	Ali		fuyang	fuyang	unknown	unknown	27/01/2020	29/01/2020	4/2/2020	5/2/2020	mild	son	fuyang	unknown	unknown	3/2/2020	3/2/2020	6/2/2020	7/2/2020	mild	father
fuyang-60	38	female			23/01/2020	23/01/2020	fuyang-94	16	male			fuyang	6/2/2020	6/2/2020	yes	Fuyang Municipal Health Commussion	http://wjw.fy.gov.cn/	Ali		fuyang	wuhan, Hubei Province	21/01/2020	unknown	28/01/2020	31/01/2020	4/2/2020	5/2/2020	mild	mother	fuyang	unknown	unknown	6/2/2020	6/2/2020	10/2/2020	11/2/2020	mild	son
fuyang-62	68	female			23/01/2020	23/01/2020	fuyang-95	54	female			fuyang	7/2/2020	7/2/2020	yes	Fuyang Municipal Health Commussion	http://wjw.fy.gov.cn/	Ali		fuyang	fuyang	unknown	unknown	30/01/2020	4/2/2020	5/2/2020	6/2/2020	mild	mother	fuyang	unknown	unknown	7/2/2020	7/2/2020	10/2/2020	11/2/2020	mild	daughter
fuyang-65	55	female			28/01/2020	28/01/2020	fuyang-99	28	male			fuyang	8/2/2020	8/2/2020	yes	Fuyang Municipal Health Commussion	http://wjw.fy.gov.cn/	Ali		fuyang	fuyang	unknown	unknown	3/2/2020	4/2/2020	5/2/2020	6/2/2020	mild	mother	fuyang	unknown	unknown	8/2/2020	8/2/2020	10/2/2020	11/2/2020	mild	son
fuyang-66	66	male			27/01/2020	27/01/2020	fuyang-79	44	female			fuyang	28/01/2020	28/01/2020	yes	Fuyang Municipal Health Commussion	http://wjw.fy.gov.cn/	Ali		fuyang	fuyang	unknown	unknown	30/01/2020	5/2/2020	5/2/2020	6/2/2020	mild	father-in-law	fuyang	unknown	unknown	5/2/2020	5/2/2020	7/2/2020	8/2/2020	mild	daughter-in-law
fuyang-68	56	female			29/01/2020	29/01/2020	fuyang-113	58	male			fuyang	11/2/2020	11/2/2020	yes	Fuyang Municipal Health Commussion	http://wjw.fy.gov.cn/	Ali		fuyang	fuyang	unknown	unknown	3/2/2020	4/2/2020	5/2/2020	6/2/2020	mild	wife	fuyang	unknown	unknown	12/2/2020	12/2/2020	13/02/2020	14/02/2020	mild	husband
fuyang-71	47	male			28/01/2020	28/01/2020	fuyang-78	46	female			wuhan, Hubei Province	27/01/2020	27/01/2020	yes	Fuyang Municipal Health Commussion	http://wjw.fy.gov.cn/	Ali		fuyang	wuhan, Hubei Province	19/01/2020	unknown	3/2/2020	3/2/2020	5/2/2020	6/2/2020	mild	husband	fuyang	19/01/2020	26/01/2020	3/2/2020	27/01/2020	7/2/2020	8/2/2020	mild	wife
fuyang-79	44	female			28/01/2020	28/01/2020	fuyang-84	45	male			fuyang	4/2/2020	4/2/2020	yes	Fuyang Municipal Health Commussion	http://wjw.fy.gov.cn/	Ali		fuyang	fuyang	unknown	unknown	5/2/2020	5/2/2020	7/2/2020	8/2/2020	mild	wife	fuyang	unknown	unknown	5/2/2020	6/2/2020	8/2/2020	9/2/2020	mild	husband
gannan-1	60	male			28/01/2020	28/01/2020	gannan-8	58	female			gannan	13/02/2020	13/02/2020	yes	Gannan Tibetan Autonomous Prefecture Health Commission	http://wsjk.gnzrmzf.gov.cn	Ali		gannan	gannan	local	unknown	30/01/2020	30/01/2020	1/2/2020	1/2/2020	mild	husband	gannan	local	31/01/2020	13/02/2020	13/02/2020	13/02/2020	14/02/2020	mild	wife
guigang-2	40	male			1/2/2020	1/2/2020	guigang-4	41	female			wuhan, Hubei Province	1/2/2020	1/2/2020	yes	Guigang Municipal People's Government	http://www.gxgg.gov.cn	Ali		guigang	wuhan, Hubei Province	18/01/2020	unknown	1/2/2020	1/2/2020	unknown	unknown	mild	husband	guigang	18/01/2020	unknown	1/2/2020	1/2/2020	unknown	unknown	mild	wife
guigang-2	40	male			1/2/2020	1/2/2020	guigang-7	10	female			wuhan, Hubei Province	5/2/2020	5/2/2020	yes	Guigang Municipal People's Government	http://www.gxgg.gov.cn	Ali		guigang	wuhan, Hubei Province	18/01/2020	unknown	1/2/2020	1/2/2020	unknown	unknown	mild	father	guigang	18/01/2020	1/2/2020	1/2/2020	unknown	5/2/2020	5/2/2020	mild	daughter
guilin-18	30	male			27/01/2020	27/01/2020	guilin-19	58	female			guilin	29/01/2020	29/01/2020	yes	Guilin Municipal Health Commussion	http://wjw.guilin.gov.cn	Ali		guilin	wuhan, Hubei Province	20/01/2020	unknown	27/01/2020	29/01/2020	29/01/2020	30/01/2020	mild	son	guilin	unknown	29/01/2020	30/01/2020	31/01/2020	31/01/2020	1/2/2020	mild	mother
guilin-24	51	female			18/01/2020	18/01/2020	guilin-28	59	male			guilin	4/2/2020	4/2/2020	yes	Guilin Municipal Health Commussion	http://wjw.guilin.gov.cn	Ali		guilin	beihai	23/01/2020	unknown	25/01/2020	2/2/2020	2/2/2020	3/2/2020	mild	wife	guilin	unknown	2/2/2020	4/2/2020	6/2/2020	6/2/2020	7/2/2020	mild	husband
hanzhong-14	41	male			31/01/2020	31/01/2020	hanzhong-15	39	female			hanzhong	27/01/2020	27/01/2020	yes	Shanxi Province Municipal Health Commussion	http://sxwjw.shaanxi.gov.cn/	Ali		hanzhong	hanzhong	local	unknown	31/01/2020	4/2/2020	4/2/2020	4/2/2020	mild	husband	hanzhong	local	unknown	28/01/2020	5/2/2020	5/2/2020	5/2/2020	mild	wife
hanzhong-20	46	male			26/01/2020	26/01/2020	hanzhong-21	71	male			hanzhong	31/01/2020	31/01/2020	yes	Shanxi Province Municipal Health Commussion	http://sxwjw.shaanxi.gov.cn/	Ali		hanzhong	ningbo	18/01/2020	unknown	26/01/2020	16/02/2020	16/02/2020	16/02/2020	mild	son	hanzhong	local	unknown	4/2/2020	14/02/2020	16/02/2020	16/02/2020	mild	father
hanzhong-25	50	male			18/01/2020	18/01/2020	hanzhong-26	40	female			wuhan, Hubei Province	18/01/2020	18/01/2020	yes	Shanxi Province Municipal Health Commussion	http://sxwjw.shaanxi.gov.cn/	Ali		hanzhong	wuhan, Hubei Province	17/01/2020	unknown	22/01/2020	27/01/2020	27/01/2020	27/01/2020	mild	husband	hanzhong	17/01/2020	unknown	22/01/2020	27/01/2020	27/01/2020	27/01/2020	mild	wife
hanzhong-25	50	male			18/01/2020	18/01/2020	hanzhong-9	27	male			hanzhong	29/01/2020	29/01/2020	yes	Shanxi Province Municipal Health Commussion	http://sxwjw.shaanxi.gov.cn/	Ali		hanzhong	wuhan, Hubei Province	17/01/2020	unknown	22/01/2020	27/01/2020	27/01/2020	27/01/2020	mild	father	hanzhong	local	27/01/2020	29/01/2020	31/01/2020	31/01/2020	31/01/2020	mild	son
hanzhong-26	40	female			18/01/2020	18/01/2020	hanzhong-2	64	female			hanzhong	22/01/2020	22/01/2020	yes	Shanxi Province Municipal Health Commussion	http://sxwjw.shaanxi.gov.cn/	Ali		hanzhong	wuhan, Hubei Province	17/01/2020	unknown	22/01/2020	27/01/2020	27/01/2020	27/01/2020	mild	daughter	hanzhong	local	unknown	25/01/2020	28/01/2020	28/01/2020	28/01/2020	mild	mother
haozhou-100	47	female			2/2/2020	2/2/2020	haozhou-104	13	female			hefei	10/2/2020	10/2/2020	yes	The People_ Government of Haozhou Municipality	http://www.bozhou.gov.cn	Ali		haozhou	haozhou	unknown	2/2/2020	8/2/2020	8/2/2020	10/2/2020	13/02/2020	mild	mother	haozhou	31/01/2020	unknown	10/2/2020	10/2/2020	10/2/2020	14/02/2020	mild	daughter
haozhou-102	36	male			27/01/2020	27/01/2020	haozhou-95	36	female			haozhou	30/01/2020	30/01/2020	yes	The People_ Government of Haozhou Municipality	http://www.bozhou.gov.cn	Ali		haozhou	haozhou	unknown	unknown	10/2/2020	10/2/2020	10/2/2020	14/02/2020	mild	husband	haozhou	unknown	unknown	10/2/2020	10/2/2020	10/2/2020	12/2/2020	mild	wife
haozhou-12	71	male			25/01/2020	25/01/2020	haozhou-13	70	female			haozhou	26/01/2020	26/01/2020	yes	The People_ Government of Haozhou Municipality	http://www.bozhou.gov.cn	Ali		haozhou	wuhan, Hubei Province	14/01/2020	unknown	26/01/2020	26/01/2020	29/01/2020	29/01/2020	mild	husband	haozhou	unknown	unknown	26/01/2020	26/01/2020	28/01/2020	29/01/2020	mild	wife
haozhou-12	71	male			25/01/2020	25/01/2020	haozhou-29	33	female			haozhou	25/01/2020	25/01/2020	yes	The People_ Government of Haozhou Municipality	http://www.bozhou.gov.cn	Ali		haozhou	wuhan, Hubei Province	14/01/2020	unknown	26/01/2020	26/01/2020	29/01/2020	29/01/2020	mild	father	haozhou	unknown	unknown	28/01/2020	28/01/2020	1/2/2020	2/2/2020	mild	daughter
haozhou-12	71	male			25/01/2020	25/01/2020	haozhou-34	37	female			haozhou	26/01/2020	26/01/2020	yes	The People_ Government of Haozhou Municipality	http://www.bozhou.gov.cn	Ali		haozhou	wuhan, Hubei Province	14/01/2020	unknown	26/01/2020	26/01/2020	29/01/2020	29/01/2020	mild	father-in-law	haozhou	17/01/2020	unknown	31/01/2020	31/01/2020	2/2/2020	3/2/2020	mild	daughter-in-law
haozhou-17	43	female			22/01/2020	22/01/2020	haozhou-35	22	male			haozhou	26/01/2020	26/01/2020	yes	The People_ Government of Haozhou Municipality	http://www.bozhou.gov.cn	Ali		haozhou	haozhou	unknown	unknown	27/01/2020	27/01/2020	29/01/2020	30/01/2020	mild	mother	haozhou	unknown	unknown	30/01/2020	30/01/2020	2/2/2020	3/2/2020	mild	son
haozhou-55	50	male			30/01/2020	30/01/2020	haozhou-60	26	male			haozhou	3/2/2020	3/2/2020	yes	The People_ Government of Haozhou Municipality	http://www.bozhou.gov.cn	Ali		haozhou	haozhou	unknown	unknown	3/2/2020	3/2/2020	4/2/2020	5/2/2020	mild	father	haozhou	unknown	unknown	4/2/2020	4/2/2020	5/2/2020	6/2/2020	mild	son
haozhou-73	42	female			1/2/2020	1/2/2020	haozhou-68	48	male			haozhou	2/2/2020	2/2/2020	yes	The People_ Government of Haozhou Municipality	http://www.bozhou.gov.cn	Ali		haozhou	haozhou	unknown	unknown	4/2/2020	4/2/2020	7/2/2020	8/2/2020	mild	wife	haozhou	unknown	unknown	4/2/2020	4/2/2020	6/2/2020	7/2/2020	mild	husband
haozhou-88	44	female			29/01/2020	29/01/2020	haozhou-89	47	male			suzhou	2/2/2020	2/2/2020	yes	The People_ Government of Haozhou Municipality	http://www.bozhou.gov.cn	Ali		haozhou	haozhou	unknown	unknown	29/01/2020	7/2/2020	9/2/2020	10/2/2020	mild	wife	haozhou	24/01/2020	unknown	7/2/2020	7/2/2020	9/2/2020	10/2/2020	mild	husband
hebi-12	65	female			4/2/2020	4/2/2020	hebi-14	66	male			hebi	10/2/2020	10/2/2020	yes	Hebi Municipal Health Commussion	https://wsjkw.hebi.gov.cn/	Ali		hebi	hebi	unknown	unknown	7/2/2020	8/2/2020	8/2/2020	9/2/2020	unknown	wife	hebi	unknown	unknown	10/2/2020	11/2/2020	11/2/2020	12/2/2020	unknown	husband
hebi-7	31	male			4/2/2020	4/2/2020	hebi-8	30	female			hebi	3/2/2020	3/2/2020	yes	Hebi Municipal Health Commussion	https://wsjkw.hebi.gov.cn/	Ali		hebi	wuhan, Hubei Province	19/01/2020	unknown	6/2/2020	7/2/2020	7/2/2020	8/2/2020	unknown	husband	hebi	unknown	unknown	6/2/2020	7/2/2020	7/2/2020	8/2/2020	unknown	wife
hebi-9	53	male			8/2/2020	8/2/2020	hebi-10	53	female			hebi	7/2/2020	7/2/2020	yes	Hebi Municipal Health Commussion	https://wsjkw.hebi.gov.cn/	Ali		hebi	wuhan, Hubei Province	16/01/2020	unknown	8/2/2020	8/2/2020	8/2/2020	9/2/2020	unknown	husband	hebi	unknown	unknown	7/2/2020	8/2/2020	8/2/2020	9/2/2020	unknown	wife
hefei-126	52	male			27/01/2020	27/01/2020	hefei-96	43	female			hefei	3/2/2020	3/2/2020	yes	Hefei Municipal Health Commussion	http://wjw.hefei.gov.cn/	Ali		hefei	hefei	unknown	unknown	6/2/2020	7/2/2020	7/2/2020	8/2/2020	mild	husband	hefei	unknown	unknown	4/2/2020	5/2/2020	5/2/2020	6/2/2020	mild	wife
hefei-134	73	female			22/01/2020	22/01/2020	hefei-133	78	male			hefei	31/01/2020	31/01/2020	yes	Hefei Municipal Health Commussion	http://wjw.hefei.gov.cn/	Ali		hefei	hefei	unknown	unknown	5/2/2020	8/2/2020	8/2/2020	9/2/2020	mild	wife	hefei	unknown	unknown	4/2/2020	8/2/2020	8/2/2020	9/2/2020	mild	husband
hefei-137	67	female			30/01/2020	30/01/2020	hefei-138	69	male			hefei	5/2/2020	5/2/2020	yes	Hefei Municipal Health Commussion	http://wjw.hefei.gov.cn/	Ali		hefei	liuan	28/01/2020	unknown	7/2/2020	9/2/2020	9/2/2020	10/2/2020	mild	wife	hefei	unknown	unknown	7/2/2020	9/2/2020	9/2/2020	10/2/2020	mild	husband
hefei-92	29	male			27/01/2020	27/01/2020	hefei-128	55	male			unknown	6/2/2020	6/2/2020	yes	Hefei Municipal Health Commussion	http://wjw.hefei.gov.cn/	Ali		hefei	unknown	27/01/2020	unknown	31/01/2020	4/2/2020	4/2/2020	5/2/2020	mild	son	hefei	27/01/2020	unknown	6/2/2020	7/2/2020	7/2/2020	8/2/2020	mild	father
huaian-19	60	male			27/01/2020	27/01/2020	huaian-22	30	female			huaian	27/01/2020	27/01/2020	yes	The People_ Government of Huaian Municipality	http://www.huaian.gov.cn	Ali		huaian	huaian	unknown	unknown	1/2/2020	1/2/2020	unknown	4/2/2020	mild	father	huaian	unknown	27/01/2020	2/2/2020	2/2/2020	3/2/2020	2/2/2020	mild	daughter
huaian-2	49	male			19/01/2020	19/01/2020	huaian-10	71	female			huaian	26/01/2020	26/01/2020	yes	The People_ Government of Huaian Municipality	http://www.huaian.gov.cn	Ali		huaian	wuhan, Hubei Province	15/01/2020	unknown	25/01/2020	25/01/2020	unknown	27/01/2020	unknown	son	huaian	unknown	unknown	26/01/2020	26/01/2020	unknown	31/01/2020	unknown	mother
huaian-2	49	male			19/01/2020	19/01/2020	huaian-11	76	male			huaian	25/01/2020	25/01/2020	yes	The People_ Government of Huaian Municipality	http://www.huaian.gov.cn	Ali		huaian	wuhan, Hubei Province	15/01/2020	unknown	25/01/2020	25/01/2020	unknown	27/01/2020	unknown	son	huaian	unknown	unknown	26/01/2020	26/01/2020	unknown	1/2/2020	unknown	father
huaian-52	59	male			2/2/2020	2/2/2020	huaian-53	59	female			huaian	7/2/2020	7/2/2020	yes	The People_ Government of Huaian Municipality	http://www.huaian.gov.cn	Ali		huaian	huaian	unknown	unknown	3/2/2020	7/2/2020	13/02/2020	14/02/2020	unknown	husband	huaian	unknown	unknown	7/2/2020	7/2/2020	13/02/2020	14/02/2020	unknown	wife
huaian-6	33	male			22/01/2020	22/01/2020	huaian-8	32	female			huaian	28/01/2020	28/01/2020	yes	The People_ Government of Huaian Municipality	http://www.huaian.gov.cn	Ali		huaian	wuhan, Hubei Province	20/01/2020	unknown	22/01/2020	28/01/2020	unknown	30/01/2020	unknown	husband	huaian	unknown	unknown	28/01/2020	28/01/2020	unknown	31/01/2020	unknown	wife
huaibei-7	46	female			26/01/2020	26/01/2020	huaibei-10	17	male			beijing	1/2/2020	1/2/2020	yes	Huaibei Municipal Health Commussion	http://wjw.huaibei.gov.cn/xxfb/tzgg/index.html	Ali		huaibei	beijing	14/01/2020	unknown	28/01/2020	31/01/2020	2/2/2020	3/2/2020	unknown	mother	huaibei	14/01/2020	31/01/2020	1/2/2020	1/2/2020	3/2/2020	4/2/2020	unknown	son
huangshan-5	unknown	unknown			20/01/2020	20/01/2020	huangshan-4	unknown	female			wuhan, Hubei Province	20/01/2020	20/01/2020	yes	Huangshan Municipal Health Commussion	http://wjw.huangshan.gov.cn	Ali		huangshan	wuhan, Hubei Province	22/01/2020	unknown	26/01/2020	26/01/2020	28/01/2020	29/01/2020	mild	grandson	huangshan	22/01/2020	unknown	26/01/2020	26/01/2020	28/01/2020	29/01/2020	mild	grandmother
huludao-3	60	female			23/01/2020	23/01/2020	huludao-6	33	male			huludao	2/2/2020	2/2/2020	yes	The People_ Government of Huludao Municipality	http://www.hld.gov.cn	Ali		huludao	wuhan, Hubei Province	14/01/2020	unknown	28/01/2020	28/01/2020	28/01/2020	29/01/2020	mild	mother	huludao	local	unknown	2/2/2020	2/2/2020	4/2/2020	6/2/2020	mild	son
jiangmen-6	28	male			23/01/2020	23/01/2020	jiangmen-21	64	male			jiangmen	23/01/2020	23/01/2020	yes	The People_ Government of Jangmen Municipality	http://www.jiangmen.gov.cn	Ali		jiangmen	unknown	21/01/2020	unknown	28/01/2020	28/01/2020	1/2/2020	4/2/2020	mild	son	jiangmen	unknown	unknown	4/2/2020	6/2/2020	7/2/2020	7/2/2020	mild	father
jiaozuo-10	47	female			26/01/2020	26/01/2020	jiaozuo-11	83	female			jiaozuo	31/01/2020	31/01/2020	yes	Jiaozuo Municipal Health Commussion	http://www.jzswjw.gov.cn/	Ali		jiaozuo	nanning	21/01/2020	30/01/2020	30/01/2020	3/2/2020	3/2/2020	4/2/2020	unknown	daughter-in-law	jiaozuo	unknown	unknown	31/01/2020	3/2/2020	3/2/2020	4/2/2020	death	mother-in-law
jiaozuo-10	47	female			26/01/2020	26/01/2020	jiaozuo-15	52	male			nanning	21/01/2020	21/01/2020	yes	Jiaozuo Municipal Health Commussion	http://www.jzswjw.gov.cn/	Ali		jiaozuo	nanning	21/01/2020	30/01/2020	30/01/2020	3/2/2020	3/2/2020	4/2/2020	unknown	wife	jiaozuo	21/01/2020	unknown	31/01/2020	4/2/2020	4/2/2020	5/2/2020	mild	husband
jiaozuo-13	28	male			1/2/2020	1/2/2020	jiaozuo-14	58	male			unknown	1/2/2020	1/2/2020	yes	Jiaozuo Municipal Health Commussion	http://www.jzswjw.gov.cn/	Ali		jiaozuo	unknown	21/01/2020	unknown	1/2/2020	4/2/2020	4/2/2020	5/2/2020	mild	son	jiaozuo	unknown	unknown	1/2/2020	4/2/2020	4/2/2020	5/2/2020	mild	father
jiaozuo-28	46	female			6/2/2020	6/2/2020	jiaozuo-31	22	male			wuhan, Hubei Province	13/02/2020	13/02/2020	yes	Jiaozuo Municipal Health Commussion	http://www.jzswjw.gov.cn/	Ali		jiaozuo	wuhan, Hubei Province	17/01/2020	unknown	8/2/2020	10/2/2020	10/2/2020	11/2/2020	mild	mother	jiaozuo	17/01/2020	unknown	13/02/2020	16/02/2020	16/02/2020	17/02/2020	mild	son
jiaxing-3	30	male			20/01/2020	20/01/2020	jiaxing-7	52	female			local	24/01/2020	24/01/2020	yes	Jiaxing Municipal Health Commussion	http://wsjkw.jiaxing.gov.cn/	Ali		jiaxing	wuhan, Hubei Province	22/01/2020	unknown	22/01/2020	23/01/2020	23/01/2020	27/01/2020	unknown	son	jiaxing	unknown	24/01/2020	unknown	25/01/2020	25/01/2020	27/01/2020	unknown	mother
jinan-26	39	female			23/01/2020	23/01/2020	jinan-37	66	female			jinan	27/01/2020	27/01/2020	yes	Jinan Municipal Health Commussion	http://jnmhc.jinan.gov.cn/col/col50360/index.html	Ali		jinan	jinan	unknown	unknown	3/2/2020	4/2/2020	4/2/2020	5/2/2020	mild	daughter-in-law	jinan	unknown	unknown	4/2/2020	4/2/2020	unknown	7/2/2020	mild	mother-in-law
jinan-26	39	female			23/01/2020	23/01/2020	jinan-45	14	female			jinan	5/2/2020	5/2/2020	yes	Jinan Municipal Health Commussion	http://jnmhc.jinan.gov.cn/col/col50360/index.html	Ali		jinan	jinan	unknown	unknown	3/2/2020	4/2/2020	4/2/2020	5/2/2020	mild	mother	jinan	unknown	4/2/2020	5/2/2020	5/2/2020	11/2/2020	12/2/2020	mild	daughter
jinan-27	49	female			23/01/2020	23/01/2020	jinan-28	22	female			jinan	26/01/2020	26/01/2020	yes	Jinan Municipal Health Commussion	http://jnmhc.jinan.gov.cn/col/col50360/index.html	Ali		jinan	jinan	unknown	unknown	3/2/2020	4/2/2020	4/2/2020	5/2/2020	mild	mother	jinan	unknown	unknown	3/2/2020	4/2/2020	4/2/2020	5/2/2020	mild	daughter
jinan-4	32	male			19/01/2020	19/01/2020	jinan-17	59	female			jinan	30/01/2020	30/01/2020	yes	Jinan Municipal Health Commussion	http://jnmhc.jinan.gov.cn/col/col50360/index.html	Ali		jinan	wuhan, Hubei Province	15/01/2020	unknown	20/01/2020	24/01/2020	24/01/2020	26/01/2020	mild	son	jinan	unknown	unknown	30/01/2020	26/01/2020	unknown	1/2/2020	mild	mother
jinzhou-4	35	male			23/01/2020	23/01/2020	jinzhou-11	56	male			jinzhou	9/2/2020	9/2/2020	yes	Jinzhou Municipal Health Commussion	http://wjw.jz.gov.cn/jzwswindex/photolist?id=1305	Ali		jinzhou	wuhan, Hubei Province	22/01/2020	unknown	23/01/2020	23/01/2020	28/01/2020	28/01/2020	mild	son-in-law	jinzhou	local	27/01/2020	9/2/2020	9/2/2020	9/2/2020	10/2/2020	mild	father-in-law
jinzhou-4	35	male			23/01/2020	23/01/2020	jinzhou-5	34	female			jinzhou	28/01/2020	28/01/2020	yes	Jinzhou Municipal Health Commussion	http://wjw.jz.gov.cn/jzwswindex/photolist?id=1305	Ali		jinzhou	wuhan, Hubei Province	22/01/2020	unknown	23/01/2020	23/01/2020	28/01/2020	28/01/2020	mild	husband	jinzhou	local	unknown	29/01/2020	29/01/2020	31/01/2020	31/01/2020	mild	wife
jinzhou-4	35	male			23/01/2020	23/01/2020	jinzhou-8	8	female			jinzhou	31/01/2020	31/01/2020	yes	Jinzhou Municipal Health Commussion	http://wjw.jz.gov.cn/jzwswindex/photolist?id=1305	Ali		jinzhou	wuhan, Hubei Province	22/01/2020	unknown	23/01/2020	23/01/2020	28/01/2020	28/01/2020	mild	father	jinzhou	local	unknown	31/01/2020	31/01/2020	7/2/2020	7/2/2020	mild	daughter
jinzhou-4	35	male			23/01/2020	23/01/2020	jinzhou-9	55	female			jinzhou	8/2/2020	8/2/2020	yes	Jinzhou Municipal Health Commussion	http://wjw.jz.gov.cn/jzwswindex/photolist?id=1305	Ali		jinzhou	wuhan, Hubei Province	22/01/2020	unknown	23/01/2020	23/01/2020	28/01/2020	28/01/2020	mild	son-in-law	jinzhou	local	unknown	3/2/2020	3/2/2020	3/2/2020	3/2/2020	mild	mother-in-law
js_taizhou-30	65	female			29/01/2020	29/01/2020	js_taizhou-32	42	female			taizhou	2/2/2020	2/2/2020	yes	Taian Municipal Health Commussion	http://wjw.taian.gov.cn/	Ali		taizhou	taizhou	unknown	unknown	4/2/2020	4/2/2020	unknown	10/2/2020	unknown	mother	taizhou	unknown	unknown	4/2/2020	4/2/2020	unknown	11/2/2020	mild	daughter
js_taizhou-32	42	female			2/2/2020	2/2/2020	js_taizhou-33	45	male			taizhou	3/2/2020	3/2/2020	yes	Taian Municipal Health Commussion	http://wjw.taian.gov.cn/	Ali		taizhou	taizhou	unknown	unknown	4/2/2020	4/2/2020	unknown	11/2/2020	mild	wife	taizhou	unknown	unknown	4/2/2020	4/2/2020	unknown	11/2/2020	mild	husband
jx_fuzhou-26	44	female			28/01/2020	28/01/2020	jx_fuzhou-25	49	male			wuhan, Hubei Province	29/01/2020	29/01/2020	yes	Fuzhou Municipal Health Commussion	http://www.fuzhou.gov.cn/zgfzzt/swjw/fzwj/wjgg/	Ali		fuzhou	wuhan, Hubei Province	20/01/2020	unknown	29/01/2020	29/01/2020	unknown	3/2/2020	mild	wife	fuzhou	20/01/2020	unknown	30/01/2020	30/01/2020	unknown	3/2/2020	mild	husband
jx_fuzhou-38	49	female			31/01/2020	31/01/2020	jx_fuzhou-57	73	female			fuzhou	1/2/2020	1/2/2020	yes	Fuzhou Municipal Health Commussion	http://www.fuzhou.gov.cn/zgfzzt/swjw/fzwj/wjgg/	Ali		fuzhou	fuzhou	local	unknown	2/2/2020	2/2/2020	unknown	5/2/2020	mild	daughter-in-law	fuzhou	local	unknown	5/2/2020	5/2/2020	unknown	8/2/2020	severe	mother-in-law
jx_fuzhou-39	48	female			1/2/2020	1/2/2020	jx_fuzhou-67	73	male			fuzhou	8/2/2020	8/2/2020	yes	Fuzhou Municipal Health Commussion	http://www.fuzhou.gov.cn/zgfzzt/swjw/fzwj/wjgg/	Ali		fuzhou	huangshi, Hubei Province	unknown	unknown	1/2/2020	1/2/2020	unknown	5/2/2020	mild	daughter	fuzhou	local	1/2/2020	8/2/2020	8/2/2020	unknown	12/2/2020	mild	father
jx_fuzhou-44	72	male			30/01/2020	30/01/2020	jx_fuzhou-60	45	male			zhuzhou	26/01/2020	26/01/2020	yes	Fuzhou Municipal Health Commussion	http://www.fuzhou.gov.cn/zgfzzt/swjw/fzwj/wjgg/	Ali		fuzhou	zhuzhou	unknown	unknown	3/2/2020	3/2/2020	unknown	6/2/2020	unknown	father	fuzhou	21/01/2020	unknown	3/2/2020	3/2/2020	unknown	9/2/2020	mild	son
jx_fuzhou-45	66	female			26/01/2020	26/01/2020	jx_fuzhou-44	72	male			zhuzhou	30/01/2020	30/01/2020	yes	Fuzhou Municipal Health Commussion	http://www.fuzhou.gov.cn/zgfzzt/swjw/fzwj/wjgg/	Ali		fuzhou	zhuzhou	unknown	unknown	3/2/2020	3/2/2020	unknown	6/2/2020	mild	wife	fuzhou	unknown	unknown	3/2/2020	3/2/2020	unknown	6/2/2020	unknown	husband
jx_fuzhou-64	40	male			3/2/2020	3/2/2020	jx_fuzhou-63	66	male			fuzhou	28/01/2020	28/01/2020	yes	Fuzhou Municipal Health Commussion	http://www.fuzhou.gov.cn/zgfzzt/swjw/fzwj/wjgg/	Ali		fuzhou	fuzhou	local	unknown	8/2/2020	8/2/2020	unknown	11/2/2020	mild	son	fuzhou	local	unknown	7/2/2020	7/2/2020	unknown	10/2/2020	mild	father
jx_fuzhou-64	40	male			3/2/2020	3/2/2020	jx_fuzhou-70	16	male			fuzhou	10/2/2020	10/2/2020	yes	Fuzhou Municipal Health Commussion	http://www.fuzhou.gov.cn/zgfzzt/swjw/fzwj/wjgg/	Ali		fuzhou	fuzhou	local	unknown	8/2/2020	8/2/2020	unknown	11/2/2020	mild	father	fuzhou	local	9/2/2020	12/2/2020	12/2/2020	unknown	14/02/2020	mild	son
kaifeng-11	30	male			27/01/2020	27/01/2020	kaifeng-19	28	female			kaifeng	6/2/2020	6/2/2020	yes	Kaifeng Municipal Health Commussion	http://www.kfwsjsw.gov.cn/	Ali		kaifeng	wuhan, Hubei Province	23/01/2020	unknown	27/01/2020	1/2/2020	1/2/2020	3/2/2020	unknown	husband	kaifeng	unknown	unknown	6/2/2020	7/2/2020	7/2/2020	8/2/2020	unknown	wife
kaifeng-12	33	male			1/2/2020	1/2/2020	kaifeng-21	6	male			shenzhen	4/2/2020	4/2/2020	yes	Kaifeng Municipal Health Commussion	http://www.kfwsjsw.gov.cn/	Ali		kaifeng	shenzhen	20/01/2020	2/2/2020	1/2/2020	3/2/2020	3/2/2020	5/2/2020	unknown	father	kaifeng	16/01/2020	unknown	4/2/2020	8/2/2020	8/2/2020	9/2/2020	unknown	son
langfang-20	30	male			27/01/2020	27/01/2020	langfang-22	53	female			langfang	7/2/2020	7/2/2020	yes	Langfang Municipal Health Commussion	http://wjw.lf.gov.cn/html/index.html	Ali		langfang	langfang	local	5/2/2020	4/2/2020	7/2/2020	7/2/2020	7/2/2020	unknown	son	langfang	local	7/2/2020	7/2/2020	8/2/2020	8/2/2020	8/2/2020	unknown	mother
langfang-7	57	female			12/1/2020	12/1/2020	langfang-11	33	female			langfang	29/01/2020	29/01/2020	yes	Langfang Municipal Health Commussion	http://wjw.lf.gov.cn/html/index.html	Ali		langfang	wuhan, Hubei Province	12/1/2020	unknown	12/1/2020	22/01/2020	28/01/2020	28/01/2020	unknown	mother	langfang	local	27/01/2020	29/01/2020	31/01/2020	31/01/2020	31/01/2020	unknown	daughter
liaocheng-10	46	female			27/01/2020	27/01/2020	liaocheng-11	40	male			liaocheng	29/01/2020	29/01/2020	yes	Liaocheng Municipal Health Commussion	http://wjw.liaocheng.gov.cn/	Ali		liaocheng	liaocheng	unknown	unknown	3/2/2020	unknown	unknown	5/2/2020	mild	wife	liaocheng	unknown	unknown	3/2/2020	unknown	unknown	5/2/2020	mild	husband
liaocheng-10	46	female			27/01/2020	27/01/2020	liaocheng-16	65	female			liaocheng	31/01/2020	31/01/2020	yes	Liaocheng Municipal Health Commussion	http://wjw.liaocheng.gov.cn/	Ali		liaocheng	liaocheng	unknown	unknown	3/2/2020	unknown	unknown	5/2/2020	mild	daughter-in-law	liaocheng	unknown	unknown	4/2/2020	unknown	unknown	7/2/2020	mild	mother-in-law
liaocheng-10	46	female			27/01/2020	27/01/2020	liaocheng-17	19	male			liaocheng	29/01/2020	29/01/2020	yes	Liaocheng Municipal Health Commussion	http://wjw.liaocheng.gov.cn/	Ali		liaocheng	liaocheng	unknown	unknown	3/2/2020	unknown	unknown	5/2/2020	mild	mother	liaocheng	9/1/2020	unknown	4/2/2020	unknown	unknown	7/2/2020	mild	son
liaocheng-10	46	female			27/01/2020	27/01/2020	liaocheng-18	10	male			liaocheng	29/01/2020	29/01/2020	yes	Liaocheng Municipal Health Commussion	http://wjw.liaocheng.gov.cn/	Ali		liaocheng	liaocheng	unknown	unknown	3/2/2020	unknown	unknown	5/2/2020	mild	mother	liaocheng	unknown	unknown	4/2/2020	4/2/2020	unknown	7/2/2020	mild	son
liaocheng-19	43	male			31/01/2020	31/01/2020	liaocheng-30	68	female			liaocheng	31/01/2020	31/01/2020	yes	Liaocheng Municipal Health Commussion	http://wjw.liaocheng.gov.cn/	Ali		liaocheng	liaocheng	unknown	1/2/2020	1/2/2020	5/2/2020	unknown	7/2/2020	mild	son-in-law	liaocheng	unknown	unknown	6/2/2020	6/2/2020	unknown	9/2/2020	mild	mother-in-law
liaocheng-19	43	male			31/01/2020	31/01/2020	liaocheng-31	72	male			liaocheng	2/2/2020	2/2/2020	yes	Liaocheng Municipal Health Commussion	http://wjw.liaocheng.gov.cn/	Ali		liaocheng	liaocheng	unknown	1/2/2020	1/2/2020	5/2/2020	unknown	7/2/2020	mild	son-in-law	liaocheng	unknown	unknown	6/2/2020	6/2/2020	unknown	9/2/2020	mild	father-in-law
liaocheng-21	49	female			31/01/2020	31/01/2020	liaocheng-22	49	male			liaocheng	5/2/2020	5/2/2020	yes	Liaocheng Municipal Health Commussion	http://wjw.liaocheng.gov.cn/	Ali		liaocheng	liaocheng	unknown	unknown	5/2/2020	5/2/2020	6/2/2020	8/2/2020	mild	wife	liaocheng	unknown	unknown	5/2/2020	5/2/2020	6/2/2020	8/2/2020	mild	husband
liaocheng-4	32	male			26/01/2020	26/01/2020	liaocheng-8	53	female			liaocheng	27/01/2020	27/01/2020	yes	Liaocheng Municipal Health Commussion	http://wjw.liaocheng.gov.cn/	Ali		liaocheng	wuhan, Hubei Province	21/01/2020	unknown	28/01/2020	28/01/2020	unknown	30/01/2020	unknown	son-in-law	liaocheng	unknown	26/01/2020	1/2/2020	1/2/2020	unknown	2/2/2020	mild	mother-in-law
liaoyuan-1	60	male			25/01/2020	25/01/2020	liaoyuan-4	47	male			liaoyuan	31/01/2020	31/01/2020	yes	Liaoyuan Municipal Health Commussion	http://wjw.liaoyuan.gov.cn	Ali		liaoyuan	wuhan, Hubei Province	17/01/2020	unknown	25/01/2020	25/01/2020	unknown	unknown	mild	father-in-law	liaoyuan	local	unknown	31/01/2020	31/01/2020	5/2/2020	5/2/2020	unknown	son-in-law
liaoyuan-1	60	male			25/01/2020	25/01/2020	liaoyuan-5	7	female			liaoyuan	2/2/2020	2/2/2020	yes	Liaoyuan Municipal Health Commussion	http://wjw.liaoyuan.gov.cn	Ali		liaoyuan	wuhan, Hubei Province	17/01/2020	unknown	25/01/2020	25/01/2020	unknown	unknown	mild	gandfather	liaoyuan	local	unknown	2/2/2020	2/2/2020	5/2/2020	5/2/2020	unknown	granddaughter
lishui-3	46	male			20/01/2020	20/01/2020	lishui-4	72	male			unknown	24/01/2020	24/01/2020	yes	Lishui Municipal Health Commussion	http://wsjsw.lishui.gov.cn/	Ali		lishui	leqing	18/01/2020	unknown	unknown	25/01/2020	25/01/2020	1/2/2020	severe	son	lishui	unknown	unknown	unknown	27/01/2020	27/01/2020	1/2/2020	severe	father
liuan-11	45	male			22/01/2020	22/01/2020	liuan-33	65	female			liuan	1/2/2020	1/2/2020	yes	Lu'an Municipal People's Government	http://www.luan.gov.cn/zwzx/jrla/zxyw/index.html	Ali		liuan	bangbu	25/01/2020	unknown	unknown	31/01/2020	31/01/2020	1/2/2020	unknown	son	liuan	unknown	unknown	1/2/2020	1/2/2020	4/2/2020	5/2/2020	mild	mother
liuan-14	34	male			25/01/2020	25/01/2020	liuan-36	26	male			liuan	2/2/2020	2/2/2020	yes	Lu'an Municipal People's Government	http://www.luan.gov.cn/zwzx/jrla/zxyw/index.html	Ali		liuan	suzhou	23/01/2020	unknown	31/01/2020	2/2/2020	2/2/2020	3/2/2020	mild	son	liuan	unknown	unknown	3/2/2020	3/2/2020	5/2/2020	6/2/2020	unknown	father
liuan-14	34	male			25/01/2020	25/01/2020	liuan-38	57	male			liuan	4/2/2020	4/2/2020	yes	Lu'an Municipal People's Government	http://www.luan.gov.cn/zwzx/jrla/zxyw/index.html	Ali		liuan	suzhou	23/01/2020	unknown	31/01/2020	2/2/2020	2/2/2020	3/2/2020	mild	son	liuan	unknown	unknown	4/2/2020	6/2/2020	6/2/2020	7/2/2020	mild	father
liuan-15	37	male			25/01/2020	25/01/2020	liuan-37	64	male			liuan	31/01/2020	31/01/2020	yes	Lu'an Municipal People's Government	http://www.luan.gov.cn/zwzx/jrla/zxyw/index.html	Ali		liuan	liuan	unknown	unknown	31/01/2020	2/2/2020	2/2/2020	3/2/2020	mild	son	liuan	unknown	unknown	4/2/2020	6/2/2020	6/2/2020	7/2/2020	mild	father
liuan-29	41	male			27/01/2020	27/01/2020	liuan-30	41	female			liuan	30/01/2020	30/01/2020	yes	Lu'an Municipal People's Government	http://www.luan.gov.cn/zwzx/jrla/zxyw/index.html	Ali		liuan	liuan	unknown	unknown	2/2/2020	3/2/2020	3/2/2020	4/2/2020	mild	husband	liuan	unknown	unknown	2/2/2020	3/2/2020	3/2/2020	4/2/2020	mild	wife
liuan-31	37	male			29/01/2020	29/01/2020	liuan-32	33	female			liuan	2/2/2020	2/2/2020	yes	Lu'an Municipal People's Government	http://www.luan.gov.cn/zwzx/jrla/zxyw/index.html	Ali		liuan	shanghai	16/01/2020	unknown	3/2/2020	4/2/2020	4/2/2020	5/2/2020	mild	husband	liuan	unknown	unknown	3/2/2020	4/2/2020	4/2/2020	5/2/2020	mild	wife
liuan-31	37	male			29/01/2020	29/01/2020	liuan-44	61	female			liuan	5/2/2020	5/2/2020	yes	Lu'an Municipal People's Government	http://www.luan.gov.cn/zwzx/jrla/zxyw/index.html	Ali		liuan	shanghai	16/01/2020	unknown	3/2/2020	4/2/2020	4/2/2020	5/2/2020	mild	son	liuan	unknown	unknown	5/2/2020	5/2/2020	7/2/2020	8/2/2020	mild	mother
liuan-34	37	female			2/2/2020	2/2/2020	liuan-50	42	male			liuan	5/2/2020	5/2/2020	yes	Lu'an Municipal People's Government	http://www.luan.gov.cn/zwzx/jrla/zxyw/index.html	Ali		liuan	liuan	unknown	unknown	2/2/2020	2/2/2020	4/2/2020	5/2/2020	mild	wife	liuan	unknown	unknown	6/2/2020	6/2/2020	7/2/2020	8/2/2020	mild	husband
liuan-34	37	female			2/2/2020	2/2/2020	liuan-51	3	male			liuan	6/2/2020	6/2/2020	yes	Lu'an Municipal People's Government	http://www.luan.gov.cn/zwzx/jrla/zxyw/index.html	Ali		liuan	liuan	unknown	unknown	2/2/2020	2/2/2020	4/2/2020	5/2/2020	mild	mother	liuan	unknown	unknown	6/2/2020	6/2/2020	7/2/2020	8/2/2020	mild	son
liuan-36	26	male			2/2/2020	2/2/2020	liuan-62	28	female			unknown	12/2/2020	12/2/2020	yes	Lu'an Municipal People's Government	http://www.luan.gov.cn/zwzx/jrla/zxyw/index.html	Ali		liuan	liuan	unknown	unknown	3/2/2020	3/2/2020	5/2/2020	6/2/2020	unknown	husband	liuan	unknown	5/2/2020	12/2/2020	14/02/2020	14/02/2020	15/02/2020	unknown	wife
liuan-41	22	male			22/01/2020	22/01/2020	liuan-35	70	male			liuan	4/2/2020	4/2/2020	yes	Lu'an Municipal People's Government	http://www.luan.gov.cn/zwzx/jrla/zxyw/index.html	Ali		liuan	wuhan, Hubei Province	19/01/2020	unknown	5/2/2020	5/2/2020	6/2/2020	7/2/2020	mild	grandson	liuan	unknown	unknown	4/2/2020	5/2/2020	5/2/2020	6/2/2020	severe	grandfather
liuan-58	26	male			9/2/2020	9/2/2020	liuan-66	1	female			liuan	14/02/2020	14/02/2020	yes	Lu'an Municipal People's Government	http://www.luan.gov.cn/zwzx/jrla/zxyw/index.html	Ali		liuan	liuan	unknown	7/2/2020	9/2/2020	9/2/2020	10/2/2020	11/2/2020	unknown	mother	liuan	unknown	10/2/2020	14/02/2020	16/02/2020	16/02/2020	17/02/2020	unknown	daughter
liuan-63	44	male			12/2/2020	12/2/2020	liuan-64	40	female			unknown	12/2/2020	12/2/2020	yes	Lu'an Municipal People's Government	http://www.luan.gov.cn/zwzx/jrla/zxyw/index.html	Ali		liuan	unknown	unknown	unknown	12/2/2020	12/2/2020	14/02/2020	15/02/2020	unknown	husband	liuan	unknown	unknown	12/2/2020	15/02/2020	15/02/2020	16/02/2020	unknown	wife
liuan-63	44	male			12/2/2020	12/2/2020	liuan-67	72	male			liuan	15/02/2020	15/02/2020	yes	Lu'an Municipal People's Government	http://www.luan.gov.cn/zwzx/jrla/zxyw/index.html	Ali		liuan	unknown	unknown	unknown	12/2/2020	12/2/2020	14/02/2020	15/02/2020	unknown	son	liuan	unknown	unknown	15/02/2020	16/02/2020	16/02/2020	17/02/2020	unknown	father
liuzhou-21	50	male			30/01/2020	30/01/2020	liuzhou-24	75	female			liuzhou	11/2/2020	11/2/2020	yes	Liuzhou Municipal Health Commussion	http://wjw.liuzhou.gov.cn/	Ali		liuzhou	liuzhou	unknown	unknown	3/2/2020	3/2/2020	5/2/2020	6/2/2020	mild	son	liuzhou	unknown	5/2/2020	11/2/2020	11/2/2020	15/02/2020	15/02/2020	mild	mother
luohe-7	34	male			22/01/2020	22/01/2020	luohe-28	8	male			tahe	4/2/2020	4/2/2020	yes	The People_ Government of Luohe Municipality	http://www.luohe.gov.cn	Ali		tahe	wuhan	21/01/2020	unknown	23/01/2020	27/01/2020	27/01/2020	28/01/2020	unknown	father	tahe	unknown	4/2/2020	4/2/2020	8/2/2020	8/2/2020	9/2/2020	unknown	son
luoyang-12	46	female			24/01/2020	24/01/2020	luoyang-15	58	male			luoyang	1/2/2020	1/2/2020	yes	The People_ Government of Luoyang Municipality	http://www.ly.gov.cn	Ali		luoyang	unknown	20/01/2020	unknown	30/01/2020	4/2/2020	4/2/2020	5/2/2020	unknown	wife	luoyang	unknown	unknown	3/2/2020	5/2/2020	5/2/2020	6/2/2020	unknown	husband
luoyang-27	70	male			26/01/2020	26/01/2020	luoyang-28	68	female			luoyang	31/01/2020	31/01/2020	yes	The People_ Government of Luoyang Municipality	http://www.ly.gov.cn	Ali		luoyang	wuhan, Hubei Province	20/01/2020	unknown	30/01/2020	30/01/2020	3/2/2020	4/2/2020	unknown	husband	luoyang	unknown	30/01/2020	31/01/2020	31/01/2020	3/2/2020	4/2/2020	unknown	wife
maanshan-25	28	female			19/01/2020	19/01/2020	maanshan-28	55	male			wuhan, Hubei Province	29/01/2020	29/01/2020	yes	The People_ Government of Maanshan Municipality	http://www.mas.gov.cn	Ali		maanshan	wuhan, Hubei Province	16/01/2020	unknown	29/01/2020	29/01/2020	1/2/2020	2/2/2020	unknown	daughter-in-law	maanshan	16/01/2020	24/01/2020	1/2/2020	29/01/2020	2/2/2020	3/2/2020	unknown	father-in-law
maanshan-3	54	female			18/01/2020	18/01/2020	maanshan-25	28	female			wuhan, Hubei Province	19/01/2020	19/01/2020	yes	The People_ Government of Maanshan Municipality	http://www.mas.gov.cn	Ali		maanshan	wuhan, Hubei Province	16/01/2020	unknown	22/01/2020	23/01/2020	25/01/2020	26/01/2020	unknown	mother-in-law	maanshan	16/01/2020	unknown	29/01/2020	29/01/2020	1/2/2020	2/2/2020	unknown	daughter-in-law
maanshan-32	51	female			29/01/2020	29/01/2020	maanshan-36	28	female			maanshan	3/2/2020	3/2/2020	yes	The People_ Government of Maanshan Municipality	http://www.mas.gov.cn	Ali		maanshan	ningbo	18/01/2020	unknown	30/01/2020	8/2/2020	10/2/2020	11/2/2020	unknown	mother-in-law	maanshan	unknown	unknown	unknown	9/2/2020	15/02/2020	16/02/2020	unknown	daughter-in-law
meishan-5	50	female			25/01/2020	25/01/2020	meishan-4	57	male			meishan	27/01/2020	27/01/2020	yes	The People_ Government of Meishan Municipality	http://www.ms.gov.cn	Ali		meishan	meishan	unknown	unknown	3/2/2020	3/2/2020	2/2/2020	4/2/2020	unknown	wife	meishan	unknown	unknown	2/2/2020	2/2/2020	2/2/2020	4/2/2020	unknown	husband
meishan-6	56	female			26/01/2020	26/01/2020	meishan-7	63	male			meishan	26/01/2020	26/01/2020	yes	The People_ Government of Meishan Municipality	http://www.ms.gov.cn	Ali		meishan	unknown	30/01/2020	unknown	6/2/2020	6/2/2020	7/2/2020	8/2/2020	unknown	wife	meishan	unknown	unknown	6/2/2020	6/2/2020	8/2/2020	9/2/2020	unknown	husband
nanchong-20	47	male			30/01/2020	30/01/2020	nanchong-27	67	female			wuhan, Hubei Province	2/2/2020	2/2/2020	yes	Nanchong Municipal Health Commussion	http://wsjsw.nanchong.gov.cn	Ali		nanchong	unknown	unknown	unknown	30/01/2020	30/01/2020	unknown	2/2/2020	unknown	son	nanchong	18/01/2020	31/01/2020	2/2/2020	2/2/2020	unknown	6/2/2020	unknown	mother
nanning-1	67	female			24/01/2020	24/01/2020	nanning-2	70	male			wuhan, Hubei Province	24/01/2020	24/01/2020	yes	Nanning Municipal Health Commussion	http://wjw.nanning.gov.cn/	Ali		nanning	wuhan, Hubei Province	18/01/2020	unknown	24/01/2020	24/01/2020	26/01/2020	26/01/2020	mild	wife	nanning	18/01/2020	unknown	24/01/2020	24/01/2020	27/01/2020	27/01/2020	mild	husband
nanning-1	67	female			24/01/2020	24/01/2020	nanning-3	35	female			nanning	24/01/2020	24/01/2020	yes	Nanning Municipal Health Commussion	http://wjw.nanning.gov.cn/	Ali		nanning	wuhan, Hubei Province	18/01/2020	unknown	24/01/2020	24/01/2020	26/01/2020	26/01/2020	mild	mother-in-law	nanning	unknown	unknown	24/01/2020	24/01/2020	27/01/2020	27/01/2020	mild	daughter-in-law
nanning-7	49	male			31/01/2020	31/01/2020	nanning-8	20	male			unknown	31/01/2020	31/01/2020	yes	Nanning Municipal Health Commussion	http://wjw.nanning.gov.cn/	Ali		nanning	unknown	24/01/2020	unknown	31/01/2020	2/2/2020	2/2/2020	2/2/2020	mild	father	nanning	8/1/2020	unknown	31/01/2020	2/2/2020	2/2/2020	2/2/2020	mild	son
nanning-7	49	male			31/01/2020	31/01/2020	nanning-16	90	male			nanning	2/2/2020	2/2/2020	yes	Nanning Municipal Health Commussion	http://wjw.nanning.gov.cn/	Ali		nanning	unknown	24/01/2020	unknown	31/01/2020	2/2/2020	2/2/2020	2/2/2020	mild	son	nanning	unknown	unknown	2/2/2020	3/2/2020	3/2/2020	4/2/2020	mild	father
nanning-7	49	male			31/01/2020	31/01/2020	nanning-9	49	female			nanning	31/01/2020	31/01/2020	yes	Nanning Municipal Health Commussion	http://wjw.nanning.gov.cn/	Ali		nanning	unknown	24/01/2020	unknown	31/01/2020	2/2/2020	2/2/2020	2/2/2020	mild	husband	nanning	unknown	unknown	31/01/2020	2/2/2020	2/2/2020	2/2/2020	mild	wife
nantong-13	67	male			25/01/2020	25/01/2020	nantong-15	68	female			nantong	1/2/2020	1/2/2020	yes	Nantong Municipal Health Commussion	http://wjw.nantong.gov.cn/	Ali		nantong	unknown	unknown	unknown	unknown	2/2/2020	2/2/2020	3/2/2020	mild	husband	nantong	unknown	unknown	unknown	3/2/2020	3/2/2020	4/2/2020	mild	wife
nantong-4	57	female			27/01/2020	27/01/2020	nantong-11	80	female			nantong	31/01/2020	31/01/2020	yes	Nantong Municipal Health Commussion	http://wjw.nantong.gov.cn/	Ali		nantong	wuhan, Hubei Province	21/01/2020	unknown	unknown	30/01/2020	30/01/2020	31/01/2020	mild	daughter	nantong	unknown	unknown	unknown	1/2/2020	1/2/2020	2/2/2020	mild	mother
nantong-4	57	female			27/01/2020	27/01/2020	nantong-23	85	male			nantong	6/2/2020	6/2/2020	yes	Nantong Municipal Health Commussion	http://wjw.nantong.gov.cn/	Ali		nantong	wuhan, Hubei Province	21/01/2020	unknown	unknown	30/01/2020	30/01/2020	31/01/2020	mild	daughter	nantong	unknown	unknown	unknown	7/2/2020	7/2/2020	8/2/2020	mild	father
nanyang-135	39	female			6/2/2020	6/2/2020	nanyang-145	38	male			nanyang	11/2/2020	11/2/2020	yes	Nanyang Municipal Health Commussion	http://nyws.nanyang.gov.cn/	Ali		nanyang	nanyang	unknown	unknown	6/2/2020	10/2/2020	10/2/2020	11/2/2020	unknown	wife	nanyang	unknown	unknown	11/2/2020	13/02/2020	13/02/2020	14/02/2020	unknown	husband
nanyang-146	55	male			8/2/2020	8/2/2020	nanyang-147	53	female			nanyang	9/2/2020	9/2/2020	yes	Nanyang Municipal Health Commussion	http://nyws.nanyang.gov.cn/	Ali		nanyang	wuhan, Hubei Province	unknown	unknown	8/2/2020	14/02/2020	14/02/2020	15/02/2020	unknown	husband	nanyang	unknown	unknown	9/2/2020	14/02/2020	14/02/2020	15/02/2020	unknown	wife
nanyang-19	55	female			20/01/2020	20/01/2020	nanyang-92	33	female			nanyang	31/01/2020	31/01/2020	yes	Nanyang Municipal Health Commussion	http://nyws.nanyang.gov.cn/	Ali		nanyang	wuhan, Hubei Province	14/01/2020	unknown	unknown	27/01/2020	27/01/2020	28/01/2020	mild	mother-in-law	nanyang	unknown	unknown	unknown	3/2/2020	3/2/2020	4/2/2020	unknown	daughter-in-law
nanyang-4	23	female			23/01/2020	23/01/2020	nanyang-121	74	male			nanyang	3/2/2020	3/2/2020	yes	Nanyang Municipal Health Commussion	http://nyws.nanyang.gov.cn/	Ali		nanyang	wuhan, Hubei Province	22/01/2020	unknown	23/01/2020	24/01/2020	24/01/2020	25/01/2020	unknown	grandaughter	nanyang	unknown	unknown	unknown	7/2/2020	7/2/2020	8/2/2020	unknown	grandfather
nanyang-56	48	male			29/01/2020	29/01/2020	nanyang-140	48	female			nanyang	7/2/2020	7/2/2020	yes	Nanyang Municipal Health Commussion	http://nyws.nanyang.gov.cn/	Ali		nanyang	nanyang	unknown	unknown	unknown	1/2/2020	1/2/2020	2/2/2020	unknown	husband	nanyang	unknown	unknown	7/2/2020	12/2/2020	12/2/2020	13/02/2020	unknown	wife
nanyang-62	34	male			22/01/2020	22/01/2020	nanyang-95	3	male			wuhan, Hubei Province	1/2/2020	1/2/2020	yes	Nanyang Municipal Health Commussion	http://nyws.nanyang.gov.cn/	Ali		nanyang	wuhan, Hubei Province	21/01/2020	unknown	unknown	1/2/2020	1/2/2020	2/2/2020	unknown	father	nanyang	21/01/2020	unknown	unknown	3/2/2020	3/2/2020	4/2/2020	unknown	son
nanyang-71	57	male			17/01/2020	17/01/2020	nanyang-94	50	female			nanyang	31/01/2020	31/01/2020	yes	Nanyang Municipal Health Commussion	http://nyws.nanyang.gov.cn/	Ali		nanyang	wuhan, Hubei Province	18/01/2020	unknown	unknown	2/2/2020	2/2/2020	3/2/2020	unknown	husband	nanyang	unknown	unknown	unknown	3/2/2020	3/2/2020	4/2/2020	unknown	wife
nanyang-79	37	male			29/01/2020	29/01/2020	nanyang-128	35	female			nanyang	3/2/2020	3/2/2020	yes	Nanyang Municipal Health Commussion	http://nyws.nanyang.gov.cn/	Ali		nanyang	nanyang	unknown	unknown	unknown	30/01/2020	30/01/2020	31/01/2020	unknown	husband	nanyang	unknown	unknown	unknown	9/2/2020	9/2/2020	10/2/2020	unknown	wife
nanyang-84	27	female			29/01/2020	29/01/2020	nanyang-116	64	female			nanyang	4/2/2020	4/2/2020	yes	Nanyang Municipal Health Commussion	http://nyws.nanyang.gov.cn/	Ali		nanyang	xiangyang, Hubei Province	13/01/2020	unknown	unknown	3/2/2020	3/2/2020	4/2/2020	unknown	daughter-in-law	nanyang	unknown	unknown	unknown	6/2/2020	6/2/2020	7/2/2020	unknown	mother-in-law
nanyang-85	29	male			30/01/2020	30/01/2020	nanyang-109	59	female			nanyang	2/2/2020	2/2/2020	yes	Nanyang Municipal Health Commussion	http://nyws.nanyang.gov.cn/	Ali		nanyang	wuhan, Hubei Province	unknown	unknown	unknown	3/2/2020	3/2/2020	4/2/2020	unknown	son	nanyang	unknown	unknown	unknown	5/2/2020	5/2/2020	6/2/2020	unknown	mother
nanyang-88	33	male			25/01/2020	25/01/2020	nanyang-89	6	male			nanyang	25/01/2020	25/01/2020	yes	Nanyang Municipal Health Commussion	http://nyws.nanyang.gov.cn/	Ali		nanyang	wuhan, Hubei Province	21/01/2020	unknown	unknown	3/2/2020	3/2/2020	4/2/2020	unknown	father	nanyang	unknown	unknown	unknown	3/2/2020	3/2/2020	4/2/2020	unknown	son
neijiang-1	44	female			23/01/2020	23/01/2020	neijiang-3	16	male			neijiang	25/01/2020	25/01/2020	yes	Neijiang Municipal Health Commussion	http://wsj.neijiang.gov.cn/	Ali		neijiang	wuhan, Hubei Province	19/01/2020	unknown	23/01/2020	23/01/2020	unknown	25/01/2020	unknown	mother	neijiang	unknown	24/01/2020	25/01/2020	25/01/2020	unknown	28/01/2020	unknown	son
panzhihua-2	49	male			29/01/2020	29/01/2020	panzhihua-11	78	female			panzhihua	3/2/2020	3/2/2020	yes	Panzhihua Municipal Health Commussion	http://wjw.panzhihua.gov.cn/	Ali		panzhihua	unknown	24/01/2020	unknown	29/01/2020	29/01/2020	unknown	1/2/2020	unknown	son	panzhihua	unknown	30/01/2020	3/2/2020	3/2/2020	unknown	8/2/2020	unknown	mother
pingliang-1	29	male			30/01/2020	30/01/2020	pingliang-2	27	female			pingliang	1/2/2020	1/2/2020	yes	Gansu Province Municipal Health Commussion	http://wjw.pingliang.gov.cn/	Ali		pingliang	pingliang	local	unknown	31/01/2020	31/01/2020	7/2/2020	7/2/2020	severe	husband	pingliang	local	unknown	4/2/2020	4/2/2020	8/2/2020	8/2/2020	mild	wife
puyang-4	56	male			29/01/2020	29/01/2020	puyang-7	55	female			puyang	5/2/2020	5/2/2020	yes	The People_ Government of Puyang Municipality	http://www.puyang.gov.cn	Ali		puyang	unknown	21/01/2020	29/01/2020	4/2/2020	7/2/2020	7/2/2020	8/2/2020	unknown	husband	puyang	unknown	unknown	7/2/2020	8/2/2020	8/2/2020	9/2/2020	unknown	wife
puyang-5	50	female			27/01/2020	27/01/2020	puyang-11	27	female			puyang	8/2/2020	8/2/2020	yes	The People_ Government of Puyang Municipality	http://www.puyang.gov.cn	Ali		puyang	puyang	unknown	8/2/2020	8/2/2020	9/2/2020	9/2/2020	10/2/2020	unknown	mother-in-law	puyang	unknown	9/2/2020	9/2/2020	14/02/2020	14/02/2020	15/02/2020	unknown	daughter-in-law
puyang-5	50	female			27/01/2020	27/01/2020	puyang-9	18	female			puyang	10/2/2020	10/2/2020	yes	The People_ Government of Puyang Municipality	http://www.puyang.gov.cn	Ali		puyang	puyang	unknown	8/2/2020	8/2/2020	9/2/2020	9/2/2020	10/2/2020	unknown	mother	puyang	unknown	unknown	10/2/2020	11/2/2020	11/2/2020	12/2/2020	unknown	daughter
puyang-8	33	male			23/01/2020	23/01/2020	puyang-10	65	male			puyang	4/2/2020	4/2/2020	yes	Puyang Municipal Health Commussion	http://www.pyswjw.gov.cn	Ali		unknown	puyang	13/01/2020	unknown	23/01/2020	10/2/2020	10/2/2020	11/2/2020	unknown	son	puyang	unknown	10/2/2020	9/2/2020	11/2/2020	11/2/2020	12/2/2020	unknown	father
puyang-8	33	male			23/01/2020	23/01/2020	puyang-12	66	female			puyang	13/02/2020	13/02/2020	yes	Puyang Municipal Health Commussion	http://www.pyswjw.gov.cn	Ali		unknown	puyang	13/01/2020	unknown	23/01/2020	10/2/2020	10/2/2020	11/2/2020	unknown	son	puyang	unknown	10/2/2020	10/2/2020	14/02/2020	14/02/2020	15/02/2020	unknown	mother
qingdao-40	55	female			3/2/2020	3/2/2020	qingdao-43	21	female			qingdao	5/2/2020	5/2/2020	yes	Qingdao Municipal Health Commussion	http://wsjsw.qingdao.gov.cn/	Ali		qingdao	qingdao	unknown	unknown	7/2/2020	7/2/2020	9/2/2020	9/2/2020	unknown	mother	qingdao	unknown	unknown	8/2/2020	5/2/2020	9/2/2020	10/2/2020	unknown	daughter
qinhuangdao-1	27	male			23/01/2020	23/01/2020	qinhuangdao-3	50	female			qinhuangdao	3/2/2020	3/2/2020	yes	Qinhuangdao Municipal Health Commussion	http://wjw.qhd.gov.cn/	Ali		qinhuangdao	beijing	22/01/2020	unknown	30/01/2020	30/01/2020	31/01/2020	31/01/2020	unknown	son-in-law	qinhuangdao	local	31/01/2020	3/2/2020	3/2/2020	4/2/2020	4/2/2020	unknown	mother-in-law
qiqihaer-11	unknown	female			16/02/2020	16/02/2020	qiqihaer-12	unknown	female			qiqihaer	16/02/2020	16/02/2020	yes	The People_ Government of Qiqihaer Municipality	http://qqhr.gov.cn/Zhuanti_showXGZYF.action	Ali		qiqihaer	qiqihaer	local	13/02/2020	16/02/2020	16/02/2020	unknown	17/02/2020	unknown	mother	qiqihaer	local	13/02/2020	16/02/2020	16/02/2020	unknown	17/02/2020	unknown	daughter
qiqihaer-9	unknown	male			12/2/2020	12/2/2020	qiqihaer-10	unknown	female			qiqihaer	12/2/2020	12/2/2020	yes	The People_ Government of Qiqihaer Municipality	http://qqhr.gov.cn/Zhuanti_showXGZYF.action	Ali		qiqihaer	qiqihaer	local	unknown	12/2/2020	17/02/2020	unknown	17/02/2020	unknown	husband	qiqihaer	local	unknown	12/2/2020	17/02/2020	unknown	17/02/2020	unknown	wife
rizhao-10	64	male			29/01/2020	29/01/2020	rizhao-12	56	female			rizhao	1/2/2020	1/2/2020	yes	Rizhao Municipal Health Commussion	http://wsjkw.rizhao.gov.cn/	Ali		rizhao	rizhao	unknown	unknown	29/01/2020	29/01/2020	unknown	1/2/2020	mild	husband	rizhao	unknown	31/01/2020	1/2/2020	1/2/2020	unknown	3/2/2020	mild	wife
rizhao-10	64	male			29/01/2020	29/01/2020	rizhao-16	42	male			rizhao	14/02/2020	14/02/2020	yes	Rizhao Municipal Health Commussion	http://wsjkw.rizhao.gov.cn/	Ali		rizhao	rizhao	unknown	unknown	29/01/2020	29/01/2020	unknown	1/2/2020	mild	father-in-law	rizhao	unknown	unknown	14/02/2020	14/02/2020	15/02/2020	15/02/2020	unknown	son-in-law
sanmenxia-4	49	female			22/01/2020	22/01/2020	sanmenxia-5	80	female			sanmenxia	24/01/2020	24/01/2020	yes	Sanmenxia Municipal Health Commussion	http://wjw.smx.gov.cn/	Ali		sanmenxia	wuhan, Hubei Province	16/01/2020	unknown	22/01/2020	unknown	unknown	unknown	unknown	daughter	sanmenxia	unknown	unknown	24/01/2020	unknown	unknown	unknown	unknown	mother
shangluo-6	25	male			7/2/2020	7/2/2020	shangluo-4	49	male			shangluo	27/01/2020	27/01/2020	yes	Shanxi Province Municipal Health Commussion	http://sxwjw.shaanxi.gov.cn/	Ali		shangluo	wuhan, Hubei Province	19/01/2020	19/01/2020	unknown	7/2/2020	7/2/2020	7/2/2020	mild	son	shangluo	local	unknown	27/01/2020	4/2/2020	4/2/2020	4/2/2020	mild	father
shangqiu-15	32	male			24/01/2020	24/01/2020	shangqiu-21	32	female			shangqiu	25/01/2020	25/01/2020	yes	Shangqiu Municipal People's Government	http://www.shangqiu.gov.cn/Category_1026/Index.aspx	Ali		shangqiu	wuhan, Hubei Province	17/01/2020	unknown	24/01/2020	29/01/2020	29/01/2020	30/01/2020	mild	husband	shangqiu	unknown	unknown	25/01/2020	30/01/2020	30/01/2020	31/01/2020	unknown	wife
shangqiu-57	81	male			30/01/2020	30/01/2020	shangqiu-62	81	female			shangqiu	5/2/2020	5/2/2020	yes	Shangqiu Municipal People's Government	http://www.shangqiu.gov.cn/Category_1026/Index.aspx	Ali		shangqiu	shangqiu	unknown	unknown	30/01/2020	5/2/2020	5/2/2020	6/2/2020	mild	husband	shangqiu	unknown	unknown	6/2/2020	6/2/2020	6/2/2020	7/2/2020	mild	wife
shangqiu-57	81	male			30/01/2020	30/01/2020	shangqiu-73	54	male			shangqiu	7/2/2020	7/2/2020	yes	Shangqiu Municipal People's Government	http://www.shangqiu.gov.cn/Category_1026/Index.aspx	Ali		shangqiu	shangqiu	unknown	unknown	30/01/2020	5/2/2020	5/2/2020	6/2/2020	mild	father	shangqiu	unknown	4/2/2020	7/2/2020	8/2/2020	8/2/2020	9/2/2020	mild	son
shangqiu-7	45	female			24/01/2020	24/01/2020	shangqiu-23	50	male			shangqiu	26/01/2020	26/01/2020	yes	Shangqiu Municipal People's Government	http://www.shangqiu.gov.cn/Category_1026/Index.aspx	Ali		shangqiu	wuhan, Hubei Province	unknown	unknown	25/01/2020	27/01/2020	27/01/2020	28/01/2020	unknown	wife	shangqiu	unknown	unknown	28/01/2020	30/01/2020	30/01/2020	31/01/2020	unknown	husband
shangqiu-78	36	male			29/01/2020	29/01/2020	shangqiu-84	13	male			shangqiu	30/01/2020	30/01/2020	yes	Shangqiu Municipal People's Government	http://www.shangqiu.gov.cn/Category_1026/Index.aspx	Ali		shangqiu	shangqiu	unknown	unknown	29/01/2020	30/01/2020	30/01/2020	10/2/2020	mild	father	shangqiu	unknown	31/01/2020	31/01/2020	2/2/2020	2/2/2020	10/2/2020	unknown	son
shanwei-2	76	male			28/01/2020	28/01/2020	shanwei-3	74	female			suizhou, Hubei Province	28/01/2020	28/01/2020	yes	Shanwei Municipal Health Commussion	http://www.shanwei.gov.cn/swwjj/	Ali		shanwei	suizhou, Hubei Province	20/01/2020	unknown	28/01/2020	28/01/2020	30/01/2020	31/01/2020	mild	husband	shanwei	20/01/2020	unknown	28/01/2020	28/01/2020	30/01/2020	31/01/2020	mild	wife
shenyang-4	21	female			23/01/2020	23/01/2020	shenyang-5	44	male			shenyang	24/01/2020	24/01/2020	yes	Shenyang Municipal Health Commussion	http://wjw.shenyang.gov.cn/	Ali		shenyang	wuhan, Hubei Province	20/01/2020	unknown	24/01/2020	24/01/2020	25/01/2020	25/01/2020	unknown	daughter	shenyang	local	unknown	24/01/2020	24/01/2020	25/01/2020	25/01/2020	unknown	father
shenyang-4	21	female			23/01/2020	23/01/2020	shenyang-6	45	female			shenyang	25/01/2020	25/01/2020	yes	Shenyang Municipal Health Commussion	http://wjw.shenyang.gov.cn/	Ali		shenyang	wuhan, Hubei Province	20/01/2020	unknown	24/01/2020	24/01/2020	25/01/2020	25/01/2020	unknown	daughter	shenyang	local	unknown	26/01/2020	26/01/2020	26/01/2020	26/01/2020	unknown	mother
shenzhen-115	64	male			18/01/2020	18/01/2020	shenzhen-387	62	female			wuhan, Hubei Province	8/2/2020	8/2/2020	yes	Shenzhen Municipal Health Commussion	http://wjw.sz.gov.cn/	Ali		shenzhen	wuhan, Hubei Province	17/01/2020	unknown	22/01/2020	unknown	unknown	1/2/2020	mild	husband	shenzhen	17/01/2020	unknown	11/2/2020	unknown	unknown	14/02/2020	mild	wife
shenzhen-13	64	female			12/1/2020	12/1/2020	shenzhen-14	71	male			wuhan, Hubei Province	15/01/2020	15/01/2020	yes	Shenzhen Municipal Health Commussion	http://wjw.sz.gov.cn/	Ali		shenzhen	wuhan, Hubei Province	12/1/2020	unknown	19/01/2020	unknown	unknown	24/01/2020	mild	wife	shenzhen	12/1/2020	unknown	19/01/2020	unknown	unknown	24/01/2020	mild	husband
shenzhen-14	71	male			15/01/2020	15/01/2020	shenzhen-39	38	female			shenzhen	22/01/2020	22/01/2020	yes	Shenzhen Municipal Health Commussion	http://wjw.sz.gov.cn/	Ali		shenzhen	wuhan, Hubei Province	12/1/2020	unknown	19/01/2020	unknown	unknown	24/01/2020	mild	father-in-law	shenzhen	local	unknown	22/01/2020	unknown	unknown	28/01/2020	mild	daughter-in-law
shenzhen-141	78	male			26/01/2020	26/01/2020	shenzhen-283	78	female			shenzhen	30/01/2020	30/01/2020	yes	Shenzhen Municipal Health Commussion	http://wjw.sz.gov.cn/	Ali		shenzhen	wuhan, Hubei Province	16/01/2020	unknown	27/01/2020	unknown	unknown	2/2/2020	mild	husband	shenzhen	local	unknown	2/2/2020	unknown	unknown	5/2/2020	mild	wife
shenzhen-171	66	male			29/01/2020	29/01/2020	shenzhen-323	60	female			shenzhen	5/2/2020	5/2/2020	yes	Shenzhen Municipal Health Commussion	http://wjw.sz.gov.cn/	Ali		shenzhen	shenzhen	local	unknown	29/01/2020	29/01/2020	unknown	2/2/2020	severe	husband	shenzhen	local	unknown	5/2/2020	unknown	unknown	7/2/2020	mild	wife
shenzhen-171	66	male			29/01/2020	29/01/2020	shenzhen-408	38	female			shenzhen	30/01/2020	30/01/2020	yes	Shenzhen Municipal Health Commussion	http://wjw.sz.gov.cn/	Ali		shenzhen	shenzhen	local	unknown	29/01/2020	29/01/2020	unknown	2/2/2020	severe	father	shenzhen	local	unknown	14/02/2020	unknown	unknown	15/02/2020	mild	daughter
shenzhen-20	73	male			20/01/2020	20/01/2020	shenzhen-68	49	male			shenzhen	24/01/2020	24/01/2020	yes	Shenzhen Municipal Health Commussion	http://wjw.sz.gov.cn/	Ali		shenzhen	wuhan, Hubei Province	19/01/2020	unknown	22/01/2020	unknown	unknown	25/01/2020	mild	father	shenzhen	local	unknown	26/01/2020	unknown	unknown	29/01/2020	mild	son
shenzhen-20	73	male			20/01/2020	20/01/2020	shenzhen-69	49	female			shenzhen	22/01/2020	22/01/2020	yes	Shenzhen Municipal Health Commussion	http://wjw.sz.gov.cn/	Ali		shenzhen	wuhan, Hubei Province	19/01/2020	unknown	22/01/2020	unknown	unknown	25/01/2020	mild	father-in-law	shenzhen	local	unknown	26/01/2020	unknown	unknown	29/01/2020	mild	daughter-in-law
shenzhen-210	36	male			26/01/2020	26/01/2020	shenzhen-237	31	female			shenzhen	23/01/2020	23/01/2020	yes	Shenzhen Municipal Health Commussion	http://wjw.sz.gov.cn/	Ali		shenzhen	aomen	24/01/2020	unknown	29/01/2020	unknown	unknown	3/2/2020	mild	husband	shenzhen	local	unknown	1/2/2020	unknown	unknown	3/2/2020	mild	wife
shenzhen-214	59	female			24/01/2020	24/01/2020	shenzhen-367	61	male			jingzhou, Hubei Province	24/01/2020	24/01/2020	yes	Shenzhen Municipal Health Commussion	http://wjw.sz.gov.cn/	Ali		shenzhen	wuhan, Hubei Province	21/01/2020	unknown	30/01/2020	unknown	unknown	3/2/2020	mild	wife	shenzhen	21/01/2020	unknown	31/01/2020	unknown	unknown	10/2/2020	mild	husband
shenzhen-214	59	female			24/01/2020	24/01/2020	shenzhen-253	34	female			shenzhen	25/01/2020	25/01/2020	yes	Shenzhen Municipal Health Commussion	http://wjw.sz.gov.cn/	Ali		shenzhen	wuhan, Hubei Province	21/01/2020	unknown	30/01/2020	unknown	unknown	3/2/2020	mild	mother-in-law	shenzhen	local	unknown	31/01/2020	unknown	unknown	4/2/2020	mild	daughter-in-law
shenzhen-255	34	male			26/01/2020	26/01/2020	shenzhen-261	34	female			shenzhen	28/01/2020	28/01/2020	yes	Shenzhen Municipal Health Commussion	http://wjw.sz.gov.cn/	Ali		shenzhen	shenzhen	local	unknown	31/01/2020	unknown	unknown	4/2/2020	mild	husband	shenzhen	local	unknown	1/2/2020	unknown	unknown	4/2/2020	mild	wife
shenzhen-255	34	male			26/01/2020	26/01/2020	shenzhen-264	4	female			shenzhen	28/01/2020	28/01/2020	yes	Shenzhen Municipal Health Commussion	http://wjw.sz.gov.cn/	Ali		shenzhen	shenzhen	local	unknown	31/01/2020	unknown	unknown	4/2/2020	mild	father	shenzhen	local	unknown	29/01/2020	unknown	unknown	4/2/2020	mild	daughter
shenzhen-322	66	male			5/2/2020	5/2/2020	shenzhen-311	34	female			wuhan, Hubei Province	28/01/2020	28/01/2020	yes	Shenzhen Municipal Health Commussion	http://wjw.sz.gov.cn/	Ali		shenzhen	xiaogan, Hubei Province	25/01/2020	unknown	5/2/2020	unknown	unknown	7/2/2020	mild	husband	shenzhen	24/01/2020	unknown	3/2/2020	unknown	unknown	6/2/2020	mild	wife
shenzhen-322	66	male			5/2/2020	5/2/2020	shenzhen-312	2	female			wuhan, Hubei Province	3/2/2020	3/2/2020	yes	Shenzhen Municipal Health Commussion	http://wjw.sz.gov.cn/	Ali		shenzhen	xiaogan, Hubei Province	25/01/2020	unknown	5/2/2020	unknown	unknown	7/2/2020	mild	father	shenzhen	24/01/2020	unknown	4/2/2020	unknown	unknown	6/2/2020	mild	daughter
shenzhen-322	66	male			5/2/2020	5/2/2020	shenzhen-341	7	female			wuhan, Hubei Province	5/2/2020	5/2/2020	yes	Shenzhen Municipal Health Commussion	http://wjw.sz.gov.cn/	Ali		shenzhen	xiaogan, Hubei Province	25/01/2020	unknown	5/2/2020	unknown	unknown	7/2/2020	mild	gandfather	shenzhen	24/01/2020	unknown	6/2/2020	unknown	unknown	8/2/2020	mild	granddaughter
shenzhen-342	64	female			30/01/2020	30/01/2020	shenzhen-343	65	male			shenzhen	7/2/2020	7/2/2020	yes	Shenzhen Municipal Health Commussion	http://wjw.sz.gov.cn/	Ali		shenzhen	shenzhen	local	unknown	7/2/2020	unknown	unknown	8/2/2020	mild	wife	shenzhen	local	unknown	7/2/2020	unknown	unknown	8/2/2020	mild	husband
shenzhen-343	65	male			7/2/2020	7/2/2020	shenzhen-368	37	female			shenzhen	4/2/2020	4/2/2020	yes	Shenzhen Municipal Health Commussion	http://wjw.sz.gov.cn/	Ali		shenzhen	shenzhen	local	unknown	7/2/2020	unknown	unknown	8/2/2020	mild	father	shenzhen	local	unknown	5/2/2020	unknown	unknown	10/2/2020	mild	daughter
shenzhen-344	63	male			3/2/2020	3/2/2020	shenzhen-300	31	male			ganzhou	3/2/2020	3/2/2020	yes	Shenzhen Municipal Health Commussion	http://wjw.sz.gov.cn/	Ali		shenzhen	shenzhen	local	unknown	3/2/2020	unknown	unknown	8/2/2020	mild	wife	shenzhen	28/01/2020	unknown	3/2/2020	unknown	unknown	6/2/2020	mild	husband
shenzhen-345	62	female			5/2/2020	5/2/2020	shenzhen-327	2	male			shenzhen	5/2/2020	5/2/2020	yes	Shenzhen Municipal Health Commussion	http://wjw.sz.gov.cn/	Ali		shenzhen	wuhan, Hubei Province	23/01/2020	unknown	5/2/2020	unknown	unknown	8/2/2020	mild	grandmother	shenzhen	local	unknown	5/2/2020	unknown	unknown	7/2/2020	mild	grandson
shenzhen-347	54	male			3/2/2020	3/2/2020	shenzhen-384	22	male			shenzhen	6/2/2020	6/2/2020	yes	Shenzhen Municipal Health Commussion	http://wjw.sz.gov.cn/	Ali		shenzhen	wuhan, Hubei Province	19/01/2020	unknown	7/2/2020	unknown	unknown	8/2/2020	mild	son	shenzhen	23/01/2020	unknown	8/2/2020	unknown	unknown	13/02/2020	mild	father
shenzhen-362	69	male			21/01/2020	21/01/2020	shenzhen-394	42	female			shenzhen	10/2/2020	10/2/2020	yes	Shenzhen Municipal Health Commussion	http://wjw.sz.gov.cn/	Ali		shenzhen	shenzhen	local	unknown	25/01/2020	unknown	unknown	9/2/2020	mild	father	shenzhen	local	unknown	12/2/2020	unknown	unknown	14/02/2020	mild	daughter
shenzhen-393	59	male			1/2/2020	1/2/2020	shenzhen-410	59	female			xianning, Hubei Province	2/2/2020	2/2/2020	yes	Shenzhen Municipal Health Commussion	http://wjw.sz.gov.cn/	Ali		shenzhen	xianning, Hubei Province	22/01/2020	unknown	12/2/2020	unknown	unknown	14/02/2020	mild	husband	shenzhen	22/01/2020	unknown	2/2/2020	unknown	unknown	15/02/2020	mild	wife
shenzhen-402	69	female			10/2/2020	10/2/2020	shenzhen-397	49	male			shenzhen	10/2/2020	10/2/2020	yes	Shenzhen Municipal Health Commussion	http://wjw.sz.gov.cn/	Ali		shenzhen	wuhan, Hubei Province	local	unknown	11/2/2020	unknown	unknown	14/02/2020	mild	mother	shenzhen	local	unknown	10/2/2020	unknown	unknown	14/02/2020	mild	son
shenzhen-415	69	male			9/2/2020	9/2/2020	shenzhen-402	69	female			wuhan, Hubei Province	10/2/2020	10/2/2020	yes	Shenzhen Municipal Health Commussion	http://wjw.sz.gov.cn/	Ali		shenzhen	wuhan, Hubei Province	20/01/2020	unknown	10/2/2020	unknown	unknown	16/02/2020	mild	husband	shenzhen	local	unknown	11/2/2020	unknown	unknown	14/02/2020	mild	wife
shenzhen-87	51	male			24/01/2020	24/01/2020	shenzhen-345	62	female			wuhan, Hubei Province	5/2/2020	5/2/2020	yes	Shenzhen Municipal Health Commussion	http://wjw.sz.gov.cn/	Ali		shenzhen	wuhan, Hubei Province	22/01/2020	unknown	25/01/2020	unknown	unknown	30/01/2020	mild	husband	shenzhen	23/01/2020	unknown	5/2/2020	unknown	unknown	8/2/2020	mild	wife
shenzhen-89	64	female			17/01/2020	17/01/2020	shenzhen-275	37	female			shenzhen	28/01/2020	28/01/2020	yes	Shenzhen Municipal Health Commussion	http://wjw.sz.gov.cn/	Ali		shenzhen	wuhan, Hubei Province	22/01/2020	unknown	24/01/2020	unknown	unknown	30/01/2020	mild	mother	shenzhen	local	unknown	1/2/2020	unknown	unknown	5/2/2020	mild	daughter
shenzhen-97	64	male			24/01/2020	24/01/2020	shenzhen-98	40	male			shenzhen	24/01/2020	24/01/2020	yes	Shenzhen Municipal Health Commussion	http://wjw.sz.gov.cn/	Ali		shenzhen	shiyan, Hubei Province	22/01/2020	unknown	26/01/2020	unknown	unknown	30/01/2020	mild	father	shenzhen	local	unknown	26/01/2020	unknown	unknown	30/01/2020	mild	son
shijiazhuang-17	42	male			24/01/2020	24/01/2020	shijiazhuang-18	67	male			shijiazhuang	30/01/2020	30/01/2020	yes	The People_ Government of Siping Municipality	http://www.siping.gov.cn	Ali		shijiazhuang	guangzhou	18/01/2020	24/01/2020	31/01/2020	3/2/2020	3/2/2020	3/2/2020	unknown	son	shijiazhuang	local	unknown	31/01/2020	3/2/2020	3/2/2020	3/2/2020	unknown	father
shijiazhuang-17	42	male			24/01/2020	24/01/2020	shijiazhuang-23	66	female			shijiazhuang	27/01/2020	27/01/2020	yes	The People_ Government of Siping Municipality	http://www.siping.gov.cn	Ali		shijiazhuang	guangzhou	18/01/2020	24/01/2020	31/01/2020	3/2/2020	3/2/2020	3/2/2020	unknown	son	shijiazhuang	local	unknown	3/2/2020	5/2/2020	5/2/2020	5/2/2020	unknown	mother
shijiazhuang-6	31	male			24/01/2020	24/01/2020	xingtai-22	69	male			xingtai	12/2/2020	12/2/2020	yes	The People_ Government of Siping Municipality	http://www.siping.gov.cn	Ali		shijiazhuang	wuhan, Hubei Province	20/01/2020	unknown	24/01/2020	26/01/2020	26/01/2020	26/01/2020	unknown	son	xingtai	local	26/01/2020	5/2/2020	10/2/2020	13/02/2020	13/02/2020	unknown	father
siping-9	46	female			29/01/2020	29/01/2020	siping-3	82	male			siping	26/01/2020	26/01/2020	yes	The People_ Government of Siping Municipality	http://www.siping.gov.cn	Ali		siping	wuhan, Hubei Province	17/01/2020	unknown	30/01/2020	5/2/2020	5/2/2020	7/2/2020	unknown	daughter	siping	local	unknown	unknown	2/2/2020	2/2/2020	2/2/2020	death	father
sx-yulin-3	27	female			22/01/2020	22/01/2020	sx-yulin-2	60	male			yulin	28/01/2020	28/01/2020	yes	The People_ Government of Yulin Municipality	http://www.yl.gov.cn	Ali		yulin	wuhan, Hubei Province	15/01/2020	unknown	22/01/2020	8/2/2020	8/2/2020	8/2/2020	mild	daughter	yulin	local	unknown	2/2/2020	6/2/2020	6/2/2020	6/2/2020	mild	father
tangshan-21	67	male			28/01/2020	28/01/2020	tangshan-22	32	male			tangshan	4/2/2020	4/2/2020	yes	Tangshan Municipal Health Commussion	http://wsjkwyh.tangshan.gov.cn/	Ali		tangshan	tangshan	local	2/2/2020	4/2/2020	7/2/2020	7/2/2020	7/2/2020	unknown	father	tangshan	local	unknown	5/2/2020	7/2/2020	7/2/2020	7/2/2020	unknown	son
tangshan-22	32	male			4/2/2020	4/2/2020	tangshan-24	71	female			tangshan	2/2/2020	2/2/2020	yes	Tangshan Municipal Health Commussion	http://wsjkwyh.tangshan.gov.cn/	Ali		tangshan	tangshan	local	unknown	5/2/2020	7/2/2020	7/2/2020	7/2/2020	unknown	husband	tangshan	local	2/2/2020	6/2/2020	6/2/2020	8/2/2020	8/2/2020	unknown	wife
tangshan-22	32	male			4/2/2020	4/2/2020	tangshan-25	6	male			tangshan	4/2/2020	4/2/2020	yes	Tangshan Municipal Health Commussion	http://wsjkwyh.tangshan.gov.cn/	Ali		tangshan	tangshan	local	unknown	5/2/2020	7/2/2020	7/2/2020	7/2/2020	unknown	father	tangshan	local	unknown	6/2/2020	6/2/2020	8/2/2020	8/2/2020	unknown	son
tianjin-102	49	male			30/01/2020	30/01/2020	tianjin-109	40	female			tianjin	10/2/2020	10/2/2020	yes	Tianjin Municipal Health Commussion	http://wsjk.tj.gov.cn/	Ali		tianjin	unknown	27/01/2020	unknown	3/2/2020	11/2/2020	11/2/2020	11/2/2020	mild	husband	tianjin	local	unknown	11/2/2020	12/2/2020	12/2/2020	12/2/2020	mild	wife
tianjin-82	47	male			3/2/2020	3/2/2020	tianjin-91	21	male			tianjin	5/2/2020	5/2/2020	yes	Tianjin Municipal Health Commussion	http://wsjk.tj.gov.cn/	Ali		tianjin	tianjin	local	unknown	6/2/2020	8/2/2020	8/2/2020	8/2/2020	unknown	father	tianjin	local	unknown	5/2/2020	9/2/2020	9/2/2020	9/2/2020	mild	son
tianjin-93	50	female			7/2/2020	7/2/2020	tianjin-107	49	male			tianjin	5/2/2020	5/2/2020	yes	Tianjin Municipal Health Commussion	http://wsjk.tj.gov.cn/	Ali		tianjin	tianjin	local	unknown	9/2/2020	10/2/2020	10/2/2020	10/2/2020	mild	wife	tianjin	local	unknown	9/2/2020	9/2/2020	11/2/2020	11/2/2020	mild	husband
tianjin-95	49	male			1/2/2020	1/2/2020	tianjin-101	50	female			tianjin	1/2/2020	1/2/2020	yes	Tianjin Municipal Health Commussion	http://wsjk.tj.gov.cn/	Ali		tianjin	tianjin	local	unknown	2/2/2020	10/2/2020	10/2/2020	10/2/2020	mild	husband	tianjin	local	unknown	2/2/2020	11/2/2020	11/2/2020	11/2/2020	mild	wife
tongchuan-1	46	male			23/01/2020	23/01/2020	tongchuan-6	74	male			tongchuan	27/01/2020	27/01/2020	yes	Shanxi Province Municipal Health Commussion	http://sxwjw.shaanxi.gov.cn/	Ali		tongchuan	wuhan, Hubei Province	20/01/2020	unknown	23/01/2020	25/01/2020	25/01/2020	25/01/2020	mild	son	tongchuan	local	25/01/2020	25/01/2020	1/2/2020	1/2/2020	1/2/2020	mild	father
tongchuan-1	46	male			23/01/2020	23/01/2020	tongchuan-7	76	female			tongchuan	27/01/2020	27/01/2020	yes	Shanxi Province Municipal Health Commussion	http://sxwjw.shaanxi.gov.cn/	Ali		tongchuan	wuhan, Hubei Province	20/01/2020	unknown	23/01/2020	25/01/2020	25/01/2020	25/01/2020	mild	son	tongchuan	local	25/01/2020	30/01/2020	3/2/2020	3/2/2020	3/2/2020	mild	mother
tongling-23	23	male			1/2/2020	1/2/2020	tongling-25	50	female			tongling	8/2/2020	8/2/2020	yes	The People_ Government of Tongling Municipality	http://www.tl.gov.cn	Ali		tongling	shanghai	23/01/2020	unknown	5/2/2020	5/2/2020	7/2/2020	8/2/2020	mild	son	tongling	unknown	unknown	8/2/2020	8/2/2020	8/2/2020	10/2/2020	mild	mother
tongren-1	50	female			14/01/2020	14/01/2020	tongren-2	17	male			tongren	19/01/2020	19/01/2020	yes	Tongren Municipal Health Commussion	http://wjw.trs.gov.cn	Ali		tongren	changsha	unknown	unknown	21/01/2020	23/01/2020	23/01/2020	23/01/2020	mild	mother	tongren	unknown	unknown	22/01/2020	24/01/2020	24/01/2020	24/01/2020	mild	son
weifang-12	33	male			20/01/2020	20/01/2020	weifang-13	31	female			weifang	24/01/2020	24/01/2020	yes	Weifang Municipal Health Commussion	http://wsjkw.weifang.gov.cn/	Ali		weifang	unknown	unknown	unknown	27/01/2020	28/01/2020	2/2/2020	3/2/2020	mild	husband	weifang	unknown	unknown	27/01/2020	27/01/2020	2/2/2020	3/2/2020	mild	wife
weihai-11	31	male			26/01/2020	26/01/2020	weihai-24	56	male			weihai	28/01/2020	28/01/2020	yes	Weihai Municipal Health Commussion	http://wsjkw.weihai.gov.cn/	Ali		weihai	wuhan, Hubei Province	22/01/2020	unknown	26/01/2020	26/01/2020	29/01/2020	29/01/2020	unknown	son	weihai	unknown	unknown	29/01/2020	29/01/2020	4/2/2020	5/2/2020	unknown	father
weihai-13	51	male			23/01/2020	23/01/2020	weihai-29	50	female			weihai	28/01/2020	28/01/2020	yes	Weihai Municipal Health Commussion	http://wsjkw.weihai.gov.cn/	Ali		weihai	weihai	unknown	unknown	unknown	30/01/2020	30/01/2020	31/01/2020	unknown	husband	weihai	unknown	unknown	28/01/2020	28/01/2020	7/2/2020	8/2/2020	unknown	wife
weihai-18	46	female			25/01/2020	25/01/2020	weihai-25	86	male			weihai	29/01/2020	29/01/2020	yes	Weihai Municipal Health Commussion	http://wsjkw.weihai.gov.cn/	Ali		weihai	wuhan, Hubei Province	21/01/2020	unknown	25/01/2020	31/01/2020	31/01/2020	1/2/2020	unknown	daughter	weihai	unknown	unknown	31/01/2020	31/01/2020	5/2/2020	6/2/2020	unknown	father
weihai-7	39	male			26/01/2020	26/01/2020	weihai-12	66	male			weihai	25/01/2020	25/01/2020	yes	Weihai Municipal Health Commussion	http://wsjkw.weihai.gov.cn/	Ali		weihai	unknown	unknown	unknown	26/01/2020	26/01/2020	unknown	27/01/2020	unknown	son	weihai	unknown	unknown	28/01/2020	28/01/2020	30/01/2020	31/01/2020	unknown	father
weihai-7	39	male			26/01/2020	26/01/2020	weihai-16	66	female			weihai	27/01/2020	27/01/2020	yes	Weihai Municipal Health Commussion	http://wsjkw.weihai.gov.cn/	Ali		weihai	unknown	unknown	unknown	26/01/2020	26/01/2020	unknown	27/01/2020	unknown	son	weihai	unknown	unknown	28/01/2020	28/01/2020	30/01/2020	31/01/2020	unknown	mother
weihai-7	39	male			26/01/2020	26/01/2020	weihai-23	3	male			weihai	2/2/2020	2/2/2020	yes	Weihai Municipal Health Commussion	http://wsjkw.weihai.gov.cn/	Ali		weihai	unknown	unknown	unknown	26/01/2020	26/01/2020	unknown	27/01/2020	unknown	father	weihai	unknown	unknown	2/2/2020	2/2/2020	4/2/2020	5/2/2020	unknown	son
weinan-2	68	male			20/01/2020	20/01/2020	weinan-3	38	male			wuhan, Hubei Province	29/01/2020	29/01/2020	yes	Shanxi Province Municipal Health Commussion	http://sxwjw.shaanxi.gov.cn/	Ali		weinan	wuhan, Hubei Province	23/01/2020	unknown	28/01/2020	31/01/2020	31/01/2020	31/01/2020	mild	father-in-law	weinan	31/01/2020	23/01/2020	30/01/2020	30/01/2020	3/2/2020	3/2/2020	mild	son-in-law
weinan-3	38	male			29/01/2020	29/01/2020	weinan-6	37	female			weinan	31/01/2020	31/01/2020	yes	Shanxi Province Municipal Health Commussion	http://sxwjw.shaanxi.gov.cn/	Ali		weinan	wuhan, Hubei Province	31/01/2020	23/01/2020	30/01/2020	30/01/2020	3/2/2020	3/2/2020	mild	husband	weinan	local	30/01/2020	1/2/2020	5/2/2020	5/2/2020	5/2/2020	mild	wife
wuhu-27	20	male			1/2/2020	1/2/2020	wuhu-31	47	female			wuhu	8/2/2020	8/2/2020	yes	Wuhu Municipal Health Commussion	http://wsjkw.wuhu.gov.cn	Ali		wuhu	wuhu	unknown	unknown	4/2/2020	4/2/2020	6/2/2020	7/2/2020	mild	son	wuhu	21/01/2020	5/2/2020	8/2/2020	8/2/2020	10/2/2020	11/2/2020	mild	mother
wuxi-20	58	male			23/01/2020	23/01/2020	wuxi-21	31	female			wuxi	25/01/2020	25/01/2020	yes	Wuxi Municipal Health Commussion	http://wjw.wuxi.gov.cn/	Ali		wuxi	Hubei Province	21/01/2020	unknown	23/01/2020	23/01/2020	unknown	3/2/2020	unknown	father-in-law	wuxi	unknown	unknown	26/01/2020	26/01/2020	unknown	3/2/2020	unknown	daughter-in-law
wuzhong-1	42	male			17/01/2020	17/01/2020	wuzhong-2	61	female			wuzhong	24/01/2020	24/01/2020	yes	The People_ Government of Wuzhong Municipality	http://www.wuzhong.gov.cn/ztzl/ztlb/jtjgczl/wsjhj/	Ali		wuzhong	wuhan, Hubei Province	14/01/2020	unknown	25/01/2020	27/01/2020	27/01/2020	28/01/2020	unknown	son-in-law	wuzhong	unknown	unknown	26/01/2020	27/01/2020	27/01/2020	28/01/2020	unknown	mother-in-law
xian-105	63	male			1/2/2020	1/2/2020	xian-70	83	female			xian	2/2/2020	2/2/2020	yes	Shanxi Province Municipal Health Commussion	http://sxwjw.shaanxi.gov.cn/	Ali		xian	wuhan, Hubei Province	23/01/2020	23/01/2020	2/2/2020	12/2/2020	12/2/2020	12/2/2020	severe	son	xian	local	unknown	2/2/2020	6/2/2020	6/2/2020	6/2/2020	mild	mother
xian-107	42	male			1/2/2020	1/2/2020	xian-85	66	female			xian	1/2/2020	1/2/2020	yes	Shanxi Province Municipal Health Commussion	http://sxwjw.shaanxi.gov.cn/	Ali		xian	suizhou, Hubei Province	26/01/2020	unknown	6/2/2020	12/2/2020	12/2/2020	12/2/2020	mild	son-in-law	xian	local	unknown	5/2/2020	8/2/2020	8/2/2020	8/2/2020	mild	mother-in-law
xian-14	45	female			23/01/2020	23/01/2020	xian-27	13	male			xiaogan, Hubei Province	26/01/2020	26/01/2020	yes	Shanxi Province Municipal Health Commussion	http://sxwjw.shaanxi.gov.cn/	Ali		xian	xiaogan, Hubei Province	22/01/2020	unknown	23/01/2020	29/01/2020	29/01/2020	29/01/2020	mild	mother	xian	20/01/2020	unknown	28/01/2020	31/01/2020	31/01/2020	31/01/2020	mild	son
xian-18	55	male			23/01/2020	23/01/2020	xian-26	55	female			xian	28/01/2020	28/01/2020	yes	Shanxi Province Municipal Health Commussion	http://sxwjw.shaanxi.gov.cn/	Ali		xian	xian	local	unknown	27/01/2020	30/01/2020	30/01/2020	30/01/2020	mild	husband	xian	local	unknown	29/01/2020	31/01/2020	31/01/2020	31/01/2020	mild	wife
xian-26	55	female			28/01/2020	28/01/2020	xian-54	24	male			xian	27/01/2020	27/01/2020	yes	Shanxi Province Municipal Health Commussion	http://sxwjw.shaanxi.gov.cn/	Ali		xian	xian	local	unknown	29/01/2020	31/01/2020	31/01/2020	31/01/2020	mild	mother	xian	local	unknown	27/01/2020	3/2/2020	3/2/2020	3/2/2020	mild	son
xian-34	62	male			26/01/2020	26/01/2020	xian-43	34	female			xian	22/01/2020	22/01/2020	yes	Shanxi Province Municipal Health Commussion	http://sxwjw.shaanxi.gov.cn/	Ali		xian	wuhan, Hubei Province	14/01/2020	26/01/2020	26/01/2020	1/2/2020	1/2/2020	1/2/2020	mild	father	xian	local	unknown	22/01/2020	2/2/2020	2/2/2020	2/2/2020	mild	daughter
xian-35	39	female			28/01/2020	28/01/2020	xian-74	65	male			wuhan, Hubei Province	3/2/2020	3/2/2020	yes	Shanxi Province Municipal Health Commussion	http://sxwjw.shaanxi.gov.cn/	Ali		xian	wuhan, Hubei Province	20/01/2020	unknown	29/01/2020	1/2/2020	1/2/2020	1/2/2020	mild	daughter	xian	20/01/2020	29/01/2020	3/2/2020	7/2/2020	7/2/2020	7/2/2020	mild	father
xian-36	41	male			27/01/2020	27/01/2020	xian-35	39	female			wuhan, Hubei Province	28/01/2020	28/01/2020	yes	Shanxi Province Municipal Health Commussion	http://sxwjw.shaanxi.gov.cn/	Ali		xian	wuhan, Hubei Province	20/01/2020	unknown	29/01/2020	1/2/2020	1/2/2020	1/2/2020	mild	husband	xian	20/01/2020	unknown	29/01/2020	1/2/2020	1/2/2020	1/2/2020	mild	wife
xian-37	40	male			28/01/2020	28/01/2020	xian-84	65	female			wuhan, Hubei Province	30/01/2020	30/01/2020	yes	Shanxi Province Municipal Health Commussion	http://sxwjw.shaanxi.gov.cn/	Ali		xian	wuhan, Hubei Province	18/01/2020	unknown	28/01/2020	1/2/2020	1/2/2020	1/2/2020	mild	son	xian	19/01/2020	unknown	1/2/2020	8/2/2020	8/2/2020	8/2/2020	mild	mother
xian-44	50	female			31/01/2020	31/01/2020	xian-102	26	male			xian	3/2/2020	3/2/2020	yes	Shanxi Province Municipal Health Commussion	http://sxwjw.shaanxi.gov.cn/	Ali		xian	xian	local	unknown	1/2/2020	2/2/2020	2/2/2020	2/2/2020	mild	mother	xian	local	1/2/2020	5/2/2020	11/2/2020	11/2/2020	11/2/2020	mild	son
xian-49	54	male			30/01/2020	30/01/2020	xian-60	53	female			xian	1/2/2020	1/2/2020	yes	Shanxi Province Municipal Health Commussion	http://sxwjw.shaanxi.gov.cn/	Ali		xian	xian	local	29/01/2020	29/01/2020	3/2/2020	3/2/2020	3/2/2020	mild	husband	xian	local	28/01/2020	unknown	5/2/2020	5/2/2020	5/2/2020	mild	wife
xian-6	64	female			10/1/2020	10/1/2020	xian-34	62	male			wuhan, Hubei Province	26/01/2020	26/01/2020	yes	Shanxi Province Municipal Health Commussion	http://sxwjw.shaanxi.gov.cn/	Ali		xian	wuhan, Hubei Province	14/01/2020	unknown	20/01/2020	26/01/2020	26/01/2020	26/01/2020	mild	wife	xian	14/01/2020	26/01/2020	26/01/2020	1/2/2020	1/2/2020	1/2/2020	mild	husband
xian-63	66	male			1/2/2020	1/2/2020	xian-80	69	female			xian	4/2/2020	4/2/2020	yes	Shanxi Province Municipal Health Commussion	http://sxwjw.shaanxi.gov.cn/	Ali		xian	xian	local	unknown	1/2/2020	5/2/2020	5/2/2020	5/2/2020	mild	husband	xian	local	4/2/2020	6/2/2020	8/2/2020	8/2/2020	8/2/2020	mild	wife
xian-67	47	male			23/01/2020	23/01/2020	xian-68	43	female			xian	28/01/2020	28/01/2020	yes	Shanxi Province Municipal Health Commussion	http://sxwjw.shaanxi.gov.cn/	Ali		xian	xian	local	unknown	25/01/2020	5/2/2020	5/2/2020	5/2/2020	mild	husband	xian	local	unknown	28/01/2020	5/2/2020	5/2/2020	5/2/2020	mild	wife
xian-74	65	male			3/2/2020	3/2/2020	xian-103	66	female			xian	8/2/2020	8/2/2020	yes	Shanxi Province Municipal Health Commussion	http://sxwjw.shaanxi.gov.cn/	Ali		xian	wuhan, Hubei Province	20/01/2020	29/01/2020	3/2/2020	7/2/2020	7/2/2020	7/2/2020	mild	husband	xian	local	30/01/2020	8/2/2020	11/2/2020	11/2/2020	11/2/2020	mild	wife
xian-83	57	female			27/01/2020	27/01/2020	xian-116	31	female			xian	8/2/2020	8/2/2020	yes	Shanxi Province Municipal Health Commussion	http://sxwjw.shaanxi.gov.cn/	Ali		xian	xian	local	unknown	27/01/2020	8/2/2020	8/2/2020	8/2/2020	mild	mother-in-law	xian	local	5/2/2020	13/02/2020	8/2/2020	17/02/2020	17/02/2020	mild	daughter-in-law
xian-87	22	male			31/01/2020	31/01/2020	xian-114	54	male			xian	2/2/2020	2/2/2020	yes	Shanxi Province Municipal Health Commussion	http://sxwjw.shaanxi.gov.cn/	Ali		xian	wuhan, Hubei Province	14/01/2020	unknown	31/01/2020	8/2/2020	8/2/2020	8/2/2020	mild	son	xian	local	unknown	3/2/2020	17/02/2020	17/02/2020	17/02/2020	mild	father
xianyang-8	62	female			24/01/2020	24/01/2020	xianyang-16	66	male			xianyang	1/2/2020	1/2/2020	yes	Xianyang Municipal Health Commussion	http://wjj.xys.gov.cn	Ali		xianyang	wuhan, Hubei Province	22/01/2020	unknown	31/01/2020	2/2/2020	2/2/2020	2/2/2020	mild	wife	xianyang	local	31/01/2020	1/2/2020	10/2/2020	10/2/2020	10/2/2020	mild	husband
xianyang-8	62	female			24/01/2020	24/01/2020	xianyang-11	40	male			wuhan, Hubei Province	28/01/2020	28/01/2020	yes	Xianyang Municipal Health Commussion	http://wjj.xys.gov.cn	Ali		xianyang	wuhan, Hubei Province	22/01/2020	unknown	31/01/2020	2/2/2020	2/2/2020	2/2/2020	mild	mother	xianyang	22/01/2020	unknown	28/01/2020	31/01/2020	5/2/2020	5/2/2020	mild	son
xingtai-6	59	male			28/01/2020	28/01/2020	xingtai-15	34	female			xingtai	1/2/2020	1/2/2020	yes	Xingtai Municipal Health Commussion	http://wsjkw.xingtai.gov.cn	Ali		xingtai	wuhan, Hubei Province	16/01/2020	unknown	28/01/2020	30/01/2020	30/01/2020	30/01/2020	mild	father	xingtai	local	unknown	1/2/2020	3/2/2020	3/2/2020	3/2/2020	mild	daughter
xinxiang-46	34	female			4/2/2020	4/2/2020	xinxiang-50	9	male			xinxiang	9/2/2020	9/2/2020	yes	Xinxiang Municipal Health Commussion	http://www.xxswjw.gov.cn/indexhtml	Ali		xinxiang	xinxiang	unknown	unknown	unknown	10/2/2020	10/2/2020	11/2/2020	unknown	mother	xinxiang	unknown	27/01/2020	9/2/2020	11/2/2020	11/2/2020	12/2/2020	unknown	son
xinxiang-48	34	male			9/2/2020	9/2/2020	xinxiang-49	59	female			xinxiang	9/2/2020	9/2/2020	yes	Xinxiang Municipal Health Commussion	http://www.xxswjw.gov.cn/indexhtml	Ali		xinxiang	xinxiang	unknown	unknown	9/2/2020	11/2/2020	11/2/2020	12/2/2020	unknown	son	xinxiang	unknown	unknown	9/2/2020	11/2/2020	11/2/2020	12/2/2020	unknown	mother
xinyang-104	51	male			26/01/2020	26/01/2020	xinyang-192	79	female			xinyang	4/2/2020	4/2/2020	yes	Xinyang Municipal Health Commussion	http://www.hnxywjw.gov.cn/	Ali		xinyang	xinyang	unknown	unknown	2/2/2020	3/2/2020	3/2/2020	4/2/2020	unknown	son	xinyang	unknown	unknown	5/2/2020	7/2/2020	7/2/2020	8/2/2020	unknown	mother
xinyang-107	62	male			24/01/2020	24/01/2020	xinyang-263	58	female			xinyang	15/02/2020	15/02/2020	yes	Xinyang Municipal Health Commussion	http://www.hnxywjw.gov.cn/	Ali		xinyang	xinyang	unknown	unknown	1/2/2020	3/2/2020	3/2/2020	4/2/2020	unknown	husband	xinyang	unknown	unknown	16/02/2020	17/02/2020	17/02/2020	18/02/2020	unknown	wife
xinyang-11	52	male			18/01/2020	18/01/2020	xinyang-55	52	female			xinyang	23/01/2020	23/01/2020	yes	Xinyang Municipal Health Commussion	http://www.hnxywjw.gov.cn/	Ali		xinyang	xinyang	unknown	unknown	23/01/2020	29/01/2020	29/01/2020	30/01/2020	unknown	husband	xinyang	unknown	unknown	24/01/2020	31/01/2020	31/01/2020	1/2/2020	unknown	wife
xinyang-117	28	female			22/01/2020	22/01/2020	xinyang-118	52	female			xinyang	26/01/2020	26/01/2020	yes	Xinyang Municipal Health Commussion	http://www.hnxywjw.gov.cn/	Ali		xinyang	xinyang	unknown	unknown	2/2/2020	4/2/2020	4/2/2020	5/2/2020	unknown	daughter	xinyang	unknown	unknown	2/2/2020	4/2/2020	4/2/2020	5/2/2020	unknown	mother
xinyang-131	46	male			26/01/2020	26/01/2020	xinyang-204	46	female			xinyang	29/01/2020	29/01/2020	yes	Xinyang Municipal Health Commussion	http://www.hnxywjw.gov.cn/	Ali		xinyang	xinyang	unknown	unknown	1/2/2020	4/2/2020	4/2/2020	5/2/2020	unknown	husband	xinyang	unknown	unknown	5/2/2020	8/2/2020	8/2/2020	9/2/2020	unknown	wife
xinyang-171	62	female			29/01/2020	29/01/2020	xinyang-242	62	male			xinyang	7/2/2020	7/2/2020	yes	Xinyang Municipal Health Commussion	http://www.hnxywjw.gov.cn/	Ali		xinyang	wuhan, Hubei Province	19/01/2020	unknown	4/2/2020	6/2/2020	6/2/2020	7/2/2020	unknown	wife	xinyang	unknown	unknown	10/2/2020	13/02/2020	13/02/2020	14/02/2020	unknown	husband
xinyang-185	51	female			5/2/2020	5/2/2020	xinyang-262	17	female			wuhan, Hubei Province	10/2/2020	10/2/2020	yes	Xinyang Municipal Health Commussion	http://www.hnxywjw.gov.cn/	Ali		xinyang	wuhan, Hubei Province	23/01/2020	unknown	5/2/2020	7/2/2020	7/2/2020	8/2/2020	unknown	mother	xinyang	23/01/2020	unknown	11/2/2020	16/02/2020	16/02/2020	17/02/2020	unknown	daughter
xinyang-209	36	male			1/2/2020	1/2/2020	xinyang-241	62	male			xinyang	9/2/2020	9/2/2020	yes	Xinyang Municipal Health Commussion	http://www.hnxywjw.gov.cn/	Ali		xinyang	xinyang	unknown	unknown	7/2/2020	9/2/2020	9/2/2020	10/2/2020	unknown	son	xinyang	unknown	unknown	12/2/2020	13/02/2020	13/02/2020	14/02/2020	unknown	father
xinyang-209	36	male			1/2/2020	1/2/2020	xinyang-266	58	female			xinyang	14/02/2020	14/02/2020	yes	Xinyang Municipal Health Commussion	http://www.hnxywjw.gov.cn/	Ali		xinyang	xinyang	unknown	unknown	7/2/2020	9/2/2020	9/2/2020	10/2/2020	unknown	son	xinyang	unknown	unknown	17/02/2020	17/02/2020	17/02/2020	18/02/2020	unknown	mother
xinyang-211	56	male			27/01/2020	27/01/2020	xinyang-250	55	female			xinyang	24/01/2020	24/01/2020	yes	Xinyang Municipal Health Commussion	http://www.hnxywjw.gov.cn/	Ali		xinyang	xinyang	unknown	unknown	7/2/2020	9/2/2020	9/2/2020	10/2/2020	unknown	husband	xinyang	unknown	unknown	13/02/2020	14/02/2020	14/02/2020	15/02/2020	unknown	wife
xinyang-215	69	female			1/2/2020	1/2/2020	xinyang-252	47	male			xinyang	10/2/2020	10/2/2020	yes	Xinyang Municipal Health Commussion	http://www.hnxywjw.gov.cn/	Ali		xinyang	xinyang	unknown	unknown	7/2/2020	9/2/2020	9/2/2020	10/2/2020	unknown	mother	xinyang	unknown	unknown	13/02/2020	14/02/2020	14/02/2020	15/02/2020	unknown	son
xinyang-22	49	female			14/01/2020	14/01/2020	xinyang-175	12	male			wuhan, Hubei Province	3/2/2020	3/2/2020	yes	Xinyang Municipal Health Commussion	http://www.hnxywjw.gov.cn/	Ali		xinyang	wuhan, Hubei Province	18/01/2020	unknown	18/01/2020	25/01/2020	25/01/2020	26/01/2020	unknown	grandmother	xinyang	18/01/2020	unknown	5/2/2020	6/2/2020	6/2/2020	7/2/2020	unknown	grandson
xinyang-220	45	male			3/2/2020	3/2/2020	xinyang-225	43	female			xinyang	5/2/2020	5/2/2020	yes	Xinyang Municipal Health Commussion	http://www.hnxywjw.gov.cn/	Ali		xinyang	guangzhou	16/01/2020	unknown	3/2/2020	9/2/2020	9/2/2020	10/2/2020	unknown	husband	xinyang	unknown	unknown	8/2/2020	10/2/2020	10/2/2020	11/2/2020	unknown	wife
xinyang-234	37	male			7/2/2020	7/2/2020	xinyang-256	9	male			xinyang	14/02/2020	14/02/2020	yes	Xinyang Municipal Health Commussion	http://www.hnxywjw.gov.cn/	Ali		xinyang	unknown	20/01/2020	unknown	11/2/2020	12/2/2020	12/2/2020	13/02/2020	unknown	father	xinyang	unknown	unknown	15/02/2020	15/02/2020	15/02/2020	16/02/2020	unknown	son
xinyang-35	56	female			21/01/2020	21/01/2020	xinyang-79	29	male			xinyang	20/01/2020	20/01/2020	yes	Xinyang Municipal Health Commussion	http://www.hnxywjw.gov.cn/	Ali		xinyang	wuhan, Hubei Province	17/01/2020	unknown	24/01/2020	25/01/2020	25/01/2020	26/01/2020	mild	mother	xinyang	unknown	unknown	27/01/2020	1/2/2020	1/2/2020	2/2/2020	unknown	son
xinyang-50	27	male			27/01/2020	27/01/2020	xinyang-140	1	male			xinyang	4/2/2020	4/2/2020	yes	Xinyang Municipal Health Commussion	http://www.hnxywjw.gov.cn/	Ali		xinyang	wuhan, Hubei Province	21/01/2020	unknown	27/01/2020	31/01/2020	31/01/2020	1/2/2020	unknown	father	xinyang	unknown	unknown	4/2/2020	5/2/2020	5/2/2020	6/2/2020	unknown	son
xinyang-50	27	male			27/01/2020	27/01/2020	xinyang-141	52	female			xinyang	1/2/2020	1/2/2020	yes	Xinyang Municipal Health Commussion	http://www.hnxywjw.gov.cn/	Ali		xinyang	wuhan, Hubei Province	21/01/2020	unknown	27/01/2020	31/01/2020	31/01/2020	1/2/2020	unknown	son	xinyang	unknown	unknown	2/2/2020	5/2/2020	5/2/2020	6/2/2020	unknown	mother
xinyang-56	71	male			30/01/2020	30/01/2020	xinyang-245	47	male			xinyang	1/2/2020	1/2/2020	yes	Xinyang Municipal Health Commussion	http://www.hnxywjw.gov.cn/	Ali		xinyang	xinyang	unknown	unknown	30/01/2020	31/01/2020	31/01/2020	1/2/2020	unknown	father	xinyang	unknown	unknown	12/2/2020	14/02/2020	14/02/2020	15/02/2020	unknown	son
xinyang-6	46	male			18/01/2020	18/01/2020	xinyang-7	80	female			xinyang	19/01/2020	19/01/2020	yes	Xinyang Municipal Health Commussion	http://www.hnxywjw.gov.cn/	Ali		xinyang	wuhan, Hubei Province	18/01/2020	unknown	23/01/2020	24/01/2020	24/01/2020	25/01/2020	unknown	son	xinyang	unknown	unknown	21/01/2020	24/01/2020	24/01/2020	25/01/2020	unknown	mother
xinyang-6	46	male			18/01/2020	18/01/2020	xinyang-8	46	female			xinyang	23/01/2020	23/01/2020	yes	Xinyang Municipal Health Commussion	http://www.hnxywjw.gov.cn/	Ali		xinyang	wuhan, Hubei Province	18/01/2020	unknown	23/01/2020	24/01/2020	24/01/2020	25/01/2020	unknown	husband	xinyang	unknown	unknown	23/01/2020	26/01/2020	26/01/2020	27/01/2020	unknown	wife
xinyang-60	61	male			26/01/2020	26/01/2020	xinyang-181	60	female			xinyang	30/01/2020	30/01/2020	yes	Xinyang Municipal Health Commussion	http://www.hnxywjw.gov.cn/	Ali		xinyang	wuhan, Hubei Province	20/01/2020	unknown	26/01/2020	31/01/2020	31/01/2020	1/2/2020	unknown	husband	xinyang	unknown	unknown	1/2/2020	7/2/2020	7/2/2020	8/2/2020	unknown	wife
xinyang-60	61	male			26/01/2020	26/01/2020	xinyang-182	32	male			xinyang	27/01/2020	27/01/2020	yes	Xinyang Municipal Health Commussion	http://www.hnxywjw.gov.cn/	Ali		xinyang	wuhan, Hubei Province	20/01/2020	unknown	26/01/2020	31/01/2020	31/01/2020	1/2/2020	unknown	father-in-law	xinyang	unknown	unknown	31/01/2020	7/2/2020	7/2/2020	8/2/2020	unknown	son-in-law
xinyang-65	30	male			24/01/2020	24/01/2020	xinyang-136	56	male			xinyang	2/2/2020	2/2/2020	yes	Xinyang Municipal Health Commussion	http://www.hnxywjw.gov.cn/	Ali		xinyang	wuhan, Hubei Province	unknown	unknown	30/01/2020	31/01/2020	31/01/2020	1/2/2020	unknown	son	xinyang	unknown	unknown	2/2/2020	4/2/2020	4/2/2020	5/2/2020	unknown	father
xinyang-74	28	female			23/01/2020	23/01/2020	xinyang-114	26	male			wuhan, Hubei Province	31/01/2020	31/01/2020	yes	Xinyang Municipal Health Commussion	http://www.hnxywjw.gov.cn/	Ali		xinyang	wuhan, Hubei Province	22/01/2020	unknown	29/01/2020	1/2/2020	1/2/2020	2/2/2020	unknown	wife	xinyang	22/01/2020	unknown	3/2/2020	4/2/2020	4/2/2020	5/2/2020	unknown	husband
xinyang-74	28	female			23/01/2020	23/01/2020	xinyang-115	54	male			xinyang	29/01/2020	29/01/2020	yes	Xinyang Municipal Health Commussion	http://www.hnxywjw.gov.cn/	Ali		xinyang	wuhan, Hubei Province	22/01/2020	unknown	29/01/2020	1/2/2020	1/2/2020	2/2/2020	unknown	daughter	xinyang	unknown	unknown	2/2/2020	4/2/2020	4/2/2020	5/2/2020	unknown	father
xinyang-80	46	female			24/01/2020	24/01/2020	xinyang-212	23	female			wuhan, Hubei Province	6/2/2020	6/2/2020	yes	Xinyang Municipal Health Commussion	http://www.hnxywjw.gov.cn/	Ali		xinyang	wuhan, Hubei Province	21/01/2020	unknown	27/01/2020	1/2/2020	1/2/2020	2/2/2020	unknown	mother	xinyang	20/01/2020	unknown	6/2/2020	9/2/2020	9/2/2020	10/2/2020	unknown	daughter
xinyang-9	45	female			22/01/2020	22/01/2020	xinyang-143	19	female			xinyang	26/01/2020	26/01/2020	yes	Xinyang Municipal Health Commussion	http://www.hnxywjw.gov.cn/	Ali		xinyang	xinyang	unknown	unknown	25/01/2020	27/01/2020	27/01/2020	28/01/2020	unknown	mother	xinyang	unknown	unknown	1/2/2020	5/2/2020	5/2/2020	6/2/2020	unknown	daughter
xuchang-1	51	female			24/01/2020	24/01/2020	xuchang-3	29	female			xuchang	27/01/2020	27/01/2020	yes	Xu Chang Municipal Health Commussion	http://xcswjw.xuchang.gov.cn/	Ali		xuchang	wuhan, Hubei Province	22/01/2020	unknown	24/01/2020	24/01/2020	24/01/2020	7/2/2020	unknown	mother	xuchang	unknown	unknown	27/01/2020	unknown	unknown	7/2/2020	unknown	daughter
xuchang-16	24	male			26/01/2020	26/01/2020	xuchang-17	51	female			xuchang	29/01/2020	29/01/2020	yes	Xu Chang Municipal Health Commussion	http://xcswjw.xuchang.gov.cn/	Ali		xuchang	wuhan, Hubei Province	19/01/2020	26/01/2020	26/01/2020	unknown	unknown	7/2/2020	unknown	son	xuchang	unknown	1/2/2020	1/2/2020	unknown	unknown	7/2/2020	unknown	mother
xuchang-25	34	male			25/01/2020	25/01/2020	xuchang-34	33	female			unknown	7/2/2020	7/2/2020	yes	Xu Chang Municipal Health Commussion	http://xcswjw.xuchang.gov.cn/	Ali		xuchang	unknown	20/01/2020	3/2/2020	3/2/2020	unknown	unknown	7/2/2020	unknown	husband	xuchang	20/01/2020	3/2/2020	7/2/2020	10/2/2020	10/2/2020	11/2/2020	unknown	wife
xuchang-32	55	male			1/2/2020	1/2/2020	xuchang-33	55	female			xuchang	4/2/2020	4/2/2020	yes	Xu Chang Municipal Health Commussion	http://xcswjw.xuchang.gov.cn/	Ali		xuchang	xuchang	unknown	2/2/2020	1/2/2020	unknown	unknown	8/2/2020	unknown	husband	xuchang	unknown	unknown	6/2/2020	8/2/2020	8/2/2020	9/2/2020	unknown	wife
yancheng-26	60	male			19/01/2020	19/01/2020	yancheng-25	55	female			yancheng	21/01/2020	21/01/2020	yes	The People_ Government of Yancheng Municipality	http://www.yancheng.gov.cn	Ali		yancheng	wuhan, Hubei Province	17/01/2020	unknown	24/01/2020	24/01/2020	28/01/2020	29/01/2020	unknown	husband	yancheng	unknown	unknown	24/01/2020	24/01/2020	28/01/2020	29/01/2020	unknown	wife
yancheng-9	55	male			29/01/2020	29/01/2020	yancheng-13	56	female			yancheng	31/01/2020	31/01/2020	yes	The People_ Government of Yancheng Municipality	http://www.yancheng.gov.cn	Ali		yancheng	yancheng	unknown	unknown	29/01/2020	29/01/2020	unknown	2/2/2020	unknown	husband	yancheng	unknown	unknown	5/2/2020	5/2/2020	unknown	10/2/2020	unknown	wife
yangzhou-1	47	female			21/01/2020	21/01/2020	yangzhou-9	23	female			yangzhou	22/01/2020	22/01/2020	yes	Yangzhou Municipal Health Commussion	http://wjw.yangzhou.gov.cn/	Ali		yangzhou	wuhan, Hubei Province	16/01/2020	unknown	21/01/2020	22/01/2020	22/01/2020	29/01/2020	unknown	mother	yangzhou	unknown	unknown	22/01/2020	22/01/2020	unknown	3/2/2020	unknown	daughter
yinchuan-5	47	female			19/01/2020	19/01/2020	yinchuan-14	54	male			yinchuan	27/01/2020	27/01/2020	yes	Yinchuan Municipal Health Commussion	http://wjw.yinchuan.gov.cn	Ali		yinchuan	unknown	unknown	unknown	25/01/2020	27/01/2020	27/01/2020	28/01/2020	unknown	wife	yinchuan	unknown	27/01/2020	27/01/2020	31/01/2020	31/01/2020	1/2/2020	unknown	husband
yueyang-93	51	male			2/2/2020	2/2/2020	yueyang-116	1	male			yueyang	8/2/2020	8/2/2020	yes	The People_ Government of Yueyang Municipality	http://www.yueyang.gov.cn/index.html	Ali		yueyang	yueyang	unknown	unknown	8/2/2020	9/2/2020	9/2/2020	10/2/2020	unknown	gandfather	yueyang	local	10/2/2020	11/2/2020	13/02/2020	13/02/2020	13/02/2020	unknown	grandson
zaozhuang-21	50	female			26/01/2020	26/01/2020	zaozhuang-22	22	male			zaozhuang	27/01/2020	27/01/2020	yes	Zaozhuang Municipal Health Commussion	http://wsjkw.zaozhuang.gov.cn/	Ali		zaozhuang	zaozhuang	unknown	unknown	30/01/2020	30/01/2020	unknown	31/01/2020	unknown	mother	zaozhuang	unknown	unknown	30/01/2020	30/01/2020	unknown	31/01/2020	unknown	son
zaozhuang-3	34	male			22/01/2020	22/01/2020	zaozhuang-4	37	female			zaozhuang	27/01/2020	27/01/2020	yes	Zaozhuang Municipal Health Commussion	http://wsjkw.zaozhuang.gov.cn/	Ali		zaozhuang	wuhan, Hubei Province	20/01/2020	unknown	24/01/2020	27/01/2020	28/01/2020	28/01/2020	mild	husband	zaozhuang	unknown	unknown	27/01/2020	27/01/2020	28/01/2020	28/01/2020	unknown	wife
zaozhuang-3	34	male			22/01/2020	22/01/2020	zaozhuang-5	60	female			zaozhuang	27/01/2020	27/01/2020	yes	Zaozhuang Municipal Health Commussion	http://wsjkw.zaozhuang.gov.cn/	Ali		zaozhuang	wuhan, Hubei Province	20/01/2020	unknown	24/01/2020	27/01/2020	28/01/2020	28/01/2020	mild	son	zaozhuang	unknown	unknown	27/01/2020	27/01/2020	28/01/2020	28/01/2020	unknown	mother
zhaoqing-7	33	female			25/01/2020	25/01/2020	zhaoqing-8	35	male			unknown	25/01/2020	25/01/2020	yes	The People_ Government of Zhaoqing Municipality	http://www.zhaoqing.gov.cn	Ali		zhaoqing	unknown	24/01/2020	unknown	31/01/2020	unknown	1/2/2020	2/2/2020	mild	wife	zhaoqing	24/01/2020	unknown	31/01/2020	unknown	3/2/2020	5/2/2020	mild	husband
zhaoqing-7	33	female			25/01/2020	25/01/2020	zhaoqing-12	10	male			unknown	5/2/2020	5/2/2020	yes	The People_ Government of Zhaoqing Municipality	http://www.zhaoqing.gov.cn	Ali		zhaoqing	unknown	24/01/2020	unknown	31/01/2020	unknown	1/2/2020	2/2/2020	mild	mother	zhaoqing	24/01/2020	unknown	unknown	5/2/2020	5/2/2020	7/2/2020	mild	son
zhaoqing-7	33	female			25/01/2020	25/01/2020	zhaoqing-11	3	male			zhaoqing	4/2/2020	4/2/2020	yes	The People_ Government of Zhaoqing Municipality	http://www.zhaoqing.gov.cn	Ali		zhaoqing	unknown	24/01/2020	unknown	31/01/2020	unknown	1/2/2020	2/2/2020	mild	mother	zhaoqing	unknown	unknown	unknown	4/2/2020	4/2/2020	5/2/2020	mild	son
zhoukou-20	35	male			23/01/2020	23/01/2020	zhoukou-52	33	female			wuhan, Hubei Province	28/01/2020	28/01/2020	yes	Zhoukou Municipal People's Government	http://www.hazhoukou.gov.cn/Home/gkml?code=gstg	Ali		zhoukou	wuhan, Hubei Province	unknown	unknown	26/01/2020	28/01/2020	28/01/2020	29/01/2020	mild	husband	zhoukou	23/01/2020	30/01/2020	30/01/2020	2/2/2020	2/2/2020	3/2/2020	mild	wife
zhoukou-39	68	male			25/01/2020	25/01/2020	zhoukou-47	70	female			zhoukou	29/01/2020	29/01/2020	yes	Zhoukou Municipal People's Government	http://www.hazhoukou.gov.cn/Home/gkml?code=gstg	Ali		zhoukou	zhoukou	unknown	28/01/2020	28/01/2020	30/01/2020	30/01/2020	31/01/2020	mild	husband	zhoukou	unknown	31/01/2020	31/01/2020	2/2/2020	2/2/2020	3/2/2020	mild	wife
zhoukou-4	46	male			18/01/2020	18/01/2020	zhoukou-5	49	female			zhoukou	19/01/2020	19/01/2020	yes	Zhoukou Municipal People's Government	http://www.hazhoukou.gov.cn/Home/gkml?code=gstg	Ali		zhoukou	wuhan, Hubei Province	18/01/2020	unknown	18/01/2020	23/01/2020	23/01/2020	27/01/2020	mild	husband	zhoukou	unknown	19/01/2020	19/01/2020	23/01/2020	23/01/2020	27/01/2020	mild	wife
zhoukou-5	49	female			19/01/2020	19/01/2020	zhoukou-40	79	female			zhoukou	21/01/2020	21/01/2020	yes	Zhoukou Municipal People's Government	http://www.hazhoukou.gov.cn/Home/gkml?code=gstg	Ali		zhoukou	zhoukou	unknown	19/01/2020	19/01/2020	23/01/2020	23/01/2020	27/01/2020	mild	daughter-in-law	zhoukou	unknown	28/01/2020	28/01/2020	30/01/2020	30/01/2020	31/01/2020	mild	mother-in-law
zhoukou-56	56	female			26/01/2020	26/01/2020	zhoukou-57	57	male			zhoukou	28/01/2020	28/01/2020	yes	Zhoukou Municipal People's Government	http://www.hazhoukou.gov.cn/Home/gkml?code=gstg	Ali		zhoukou	zhoukou	unknown	1/2/2020	1/2/2020	3/2/2020	3/2/2020	4/2/2020	mild	wife	zhoukou	unknown	1/2/2020	1/2/2020	3/2/2020	3/2/2020	4/2/2020	mild	husband
zhoukou-66	31	male			2/2/2020	2/2/2020	zhoukou-69	27	female			zhoukou	11/2/2020	11/2/2020	yes	Zhoukou Municipal People's Government	http://www.hazhoukou.gov.cn/Home/gkml?code=gstg	Ali		zhoukou	unknown	16/01/2020	6/2/2020	6/2/2020	7/2/2020	7/2/2020	8/2/2020	mild	husband	zhoukou	unknown	6/2/2020	11/2/2020	12/2/2020	12/2/2020	13/02/2020	mild	wife
zhuhai-38	37	female			26/01/2020	26/01/2020	zhuhai-39	67	female			zhongshan	26/01/2020	26/01/2020	yes	offical Weibo of Zhuhai municipal Health Bureau	https://weibo.com/u/3603732332	Ali		zhuhai	wuhan, Hubei Province	22/01/2020	unknown	30/01/2020	30/01/2020	unknown	5/2/2020	unknown	daughter	zhuhai	local	unknown	30/01/2020	30/01/2020	unknown	6/2/2020	unknown	mother
zhuhai-7	36	male			20/01/2020	20/01/2020	zhuhai-8	38	female			zhuhai	20/01/2020	20/01/2020	yes	offical Weibo of Zhuhai municipal Health Bureau	https://weibo.com/u/3603732332	Ali		zhuhai	wuhan, Hubei Province	unknown	unknown	20/01/2020	20/01/2020	24/01/2020	24/01/2020	mild	husband	zhuhai	local	unknown	20/01/2020	20/01/2020	24/01/2020	24/01/2020	mild	wife
yuxi-5	62	female			31/01/2020	31/01/2020	yuxi-6	37	female			wuhan, Hubei Province	31/01/2020	31/01/2020	no	Health Commission of Yunnan Province	http://ynswsjkw.yn.gov.cn/wjwWebsite/web/index	Ali		yuxi	wuhan, Hubei Province	19/01/2020	unknown	31/01/2020	31/01/2020	1/2/2020	2/2/2020	unknown	relative	yuxi	20/01/2020	unknown	31/01/2020	31/01/2020	1/2/2020	2/2/2020	unknown	relative
yuxi-5	62	female			31/01/2020	31/01/2020	yuxi-8	10	female			wuhan, Hubei Province	31/01/2020	31/01/2020	no	Health Commission of Yunnan Province	http://ynswsjkw.yn.gov.cn/wjwWebsite/web/index	Ali		yuxi	wuhan, Hubei Province	19/01/2020	unknown	31/01/2020	31/01/2020	1/2/2020	2/2/2020	unknown	relative	yuxi	19/01/2020	unknown	31/01/2020	31/01/2020	5/2/2020	6/2/2020	unknown	relative
yuxi-5	62	female			31/01/2020	31/01/2020	yuxi-3	53	female			wuhan, Hubei Province	1/2/2020	1/2/2020	no	Health Commission of Yunnan Province	http://ynswsjkw.yn.gov.cn/wjwWebsite/web/index	Ali		yuxi	wuhan, Hubei Province	19/01/2020	unknown	31/01/2020	31/01/2020	1/2/2020	2/2/2020	unknown	relative	yuxi	19/01/2020	unknown	1/2/2020	1/2/2020	1/2/2020	2/2/2020	unknown	relative
yuxi-5	62	female			31/01/2020	31/01/2020	yuxi-2	70	female			yuxi	31/01/2020	31/01/2020	no	Health Commission of Yunnan Province	http://ynswsjkw.yn.gov.cn/wjwWebsite/web/index	Ali		yuxi	wuhan, Hubei Province	19/01/2020	unknown	31/01/2020	31/01/2020	1/2/2020	2/2/2020	unknown	relative	yuxi	unknown	unknown	31/01/2020	31/01/2020	31/01/2020	1/2/2020	unknown	relative
yuxi-5	62	female			31/01/2020	31/01/2020	yuxi-4	72	male			yuxi	31/01/2020	31/01/2020	no	Health Commission of Yunnan Province	http://ynswsjkw.yn.gov.cn/wjwWebsite/web/index	Ali		yuxi	wuhan, Hubei Province	19/01/2020	unknown	31/01/2020	31/01/2020	1/2/2020	2/2/2020	unknown	relative	yuxi	unknown	unknown	31/01/2020	31/01/2020	1/2/2020	2/2/2020	unknown	relative
changchun-2	50	male			23/01/2020	23/01/2020	changchun-7	78	male			changchun	25/01/2020	25/01/2020	no	Changchun Municipal Health Commussion	http://wjw.changchun.gov.cn	Ali		changchun	wuhan, Hubei Province	16/01/2020	unknown	28/01/2020	28/01/2020	unknown	unknown	unknown	relative	changchun	unknown	unknown	29/01/2020	29/01/2020	2/2/2020	2/2/2020	unknown	relative
liaoyuan-1	60	male			25/01/2020	25/01/2020	liaoyuan-7	50	male			liaoyuan	8/2/2020	8/2/2020	no	Liaoyuan Municipal Health Commussion	http://wjw.liaoyuan.gov.cn	Ali		liaoyuan	wuhan, Hubei Province	17/01/2020	unknown	25/01/2020	25/01/2020	unknown	unknown	mild	close contact	liaoyuan	local	unknown	unknown	14/02/2020	14/02/2020	15/02/2020	unknown	close contact
siping-1	33	male			25/01/2020	25/01/2020	siping-11	27	female			siping	1/2/2020	1/2/2020	no	The People_ Government of Siping Municipality	http://www.siping.gov.cn	Ali		siping	wuhan, Hubei Province	19/01/2020	unknown	25/01/2020	25/01/2020	26/01/2020	27/01/2020	mild	close contact	siping	local	unknown	4/2/2020	4/2/2020	8/2/2020	9/2/2020	unknown	close contact
siping-1	33	male			25/01/2020	25/01/2020	siping-4	33	male			siping	27/01/2020	27/01/2020	no	The People_ Government of Siping Municipality	http://www.siping.gov.cn	Ali		siping	wuhan, Hubei Province	19/01/2020	unknown	25/01/2020	25/01/2020	26/01/2020	27/01/2020	mild	schoolmate	siping	local	unknown	unknown	2/2/2020	2/2/2020	2/2/2020	mild	schoolmate
siping-1	33	male			25/01/2020	25/01/2020	siping-5	29	male			siping	28/01/2020	28/01/2020	no	The People_ Government of Siping Municipality	http://www.siping.gov.cn	Ali		siping	wuhan, Hubei Province	19/01/2020	unknown	25/01/2020	25/01/2020	26/01/2020	27/01/2020	mild	close contact	siping	21/01/2020	unknown	29/01/2020	29/01/2020	3/2/2020	unknown	unknown	schoolmate
siping-5	29	male			28/01/2020	28/01/2020	siping-6	56	male			siping	30/01/2020	30/01/2020	no	The People_ Government of Siping Municipality	http://www.siping.gov.cn	Ali		siping	siping	21/01/2020	unknown	29/01/2020	29/01/2020	3/2/2020	unknown	unknown	close contact	siping	local	unknown	30/01/2020	30/01/2020	3/2/2020	unknown	unknown	schoolmate
bazhong-16	45	male			29/01/2020	29/01/2020	bazhong-23	53	female			bazhong	1/2/2020	1/2/2020	no	Bazhong Municipal Health Commussion	http://wsjkw.cnbz.gov.cn/index.html	Ali		bazhong	wuhan, Hubei Province	21/01/2020	unknown	29/01/2020	29/01/2020	unknown	5/2/2020	unknown	cousin	bazhong	unknown	31/01/2020	3/2/2020	4/2/2020	unknown	8/2/2020	unknown	cousin
bazhong-16	45	male			29/01/2020	29/01/2020	bazhong-26	18	female			bazhong	13/02/2020	13/02/2020	no	Bazhong Municipal Health Commussion	http://wsjkw.cnbz.gov.cn/index.html	Ali		bazhong	wuhan, Hubei Province	21/01/2020	unknown	29/01/2020	29/01/2020	unknown	5/2/2020	unknown	relative	bazhong	unknown	4/2/2020	unknown	13/02/2020	13/02/2020	14/02/2020	unknown	relative
chengdu-95	49	male			23/01/2020	23/01/2020	chengdu-97	81	male			chengdu	4/2/2020	4/2/2020	no	Chengdu Municipal Health Commussion	http://cdwjw.chengdu.gov.cn/cdwjw/c135632/yqbd.shtml	Ali		chengdu	huanggang, Hubei Province	20/01/2020	unknown	unknown	8/2/2020	8/2/2020	9/2/2020	unknown	relative	chengdu	unknown	unknown	unknown	8/2/2020	8/2/2020	9/2/2020	unknown	relative
deyang-3	53	male			28/01/2020	28/01/2020	deyang-11	44	male			deyang	30/01/2020	30/01/2020	no	Deyang Municipal Health Commussion	https://wjw.deyang.gov.cn/	Ali		deyang	wuhan, Hubei Province	22/01/2020	24/01/2020	28/01/2020	unknown	29/01/2020	30/01/2020	unknown	close contact	deyang	unknown	unknown	30/01/2020	30/01/2020	3/2/2020	4/2/2020	unknown	close contact
deyang-2	47	female			27/01/2020	27/01/2020	deyang-14	45	male			deyang	2/2/2020	2/2/2020	no	Deyang Municipal Health Commussion	https://wjw.deyang.gov.cn/	Ali		deyang	wuhan, Hubei Province	20/01/2020	unknown	27/01/2020	27/01/2020	28/01/2020	29/01/2020	unknown	sister	deyang	unknown	28/01/2020	2/2/2020	2/2/2020	unknown	9/2/2020	unknown	brother
deyang-2	47	female			27/01/2020	27/01/2020	deyang-7	44	female			deyang	29/01/2020	29/01/2020	no	Deyang Municipal Health Commussion	https://wjw.deyang.gov.cn/	Ali		deyang	wuhan, Hubei Province	20/01/2020	unknown	27/01/2020	27/01/2020	28/01/2020	29/01/2020	unknown	sister	deyang	unknown	29/01/2020	29/01/2020	29/01/2020	29/01/2020	31/01/2020	unknown	sister-in-law
leshan-2	32	male			25/01/2020	25/01/2020	leshan-3	49	female			leshan	5/2/2020	5/2/2020	no	Leshan Municipal Health Commussion	http://swjj.leshan.gov.cn	Ali		leshan	wuhan, Hubei Province	21/01/2020	unknown	25/01/2020	25/01/2020	unknown	28/01/2020	unknown	close contact	leshan	unknown	27/01/2020	5/2/2020	5/2/2020	6/2/2020	7/2/2020	unknown	close contact
luzhou-2	31	male			25/01/2020	25/01/2020	luzhou-3	24	female			wuhan, Hubei Province	26/01/2020	26/01/2020	no	The People_ Government of Luzhou Municipality	http://www.luzhou.gov.cn	Ali		luzhou	wuhan, Hubei Province	20/01/2020	unknown	25/01/2020	25/01/2020	unknown	28/01/2020	unknown	close contact	luzhou	20/01/2020	unknown	25/01/2020	26/01/2020	unknown	29/01/2020	unknown	close contact
mianyang-14	75	male			24/01/2020	24/01/2020	mianyang-13	73	female			wuhan, Hubei Province	25/01/2020	25/01/2020	no	Mianyang Municipal Health Commussion	http://wjw.my.gov.cn	Ali		mianyang	wuhan, Hubei Province	23/01/2020	unknown	31/01/2020	31/01/2020	unknown	2/2/2020	unknown	relative	mianyang	23/01/2020	unknown	31/01/2020	31/01/2020	unknown	2/2/2020	unknown	relative
mianyang-12	37	female			28/01/2020	28/01/2020	mianyang-19	7	male			wuhan, Hubei Province	5/2/2020	5/2/2020	no	Mianyang Municipal Health Commussion	http://wjw.my.gov.cn	Ali		mianyang	wuhan, Hubei Province	23/01/2020	unknown	30/01/2020	30/01/2020	unknown	1/2/2020	unknown	close contact	mianyang	23/01/2020	31/01/2020	5/2/2020	unknown	unknown	7/2/2020	unknown	close contact
mianyang-13	73	female			25/01/2020	25/01/2020	mianyang-12	37	female			wuhan, Hubei Province	28/01/2020	28/01/2020	no	Mianyang Municipal Health Commussion	http://wjw.my.gov.cn	Ali		mianyang	wuhan, Hubei Province	23/01/2020	unknown	31/01/2020	31/01/2020	unknown	2/2/2020	unknown	relative	mianyang	23/01/2020	unknown	30/01/2020	30/01/2020	unknown	1/2/2020	unknown	relative
nanchong-10	59	male			29/01/2020	29/01/2020	nanchong-28	35	female			nanchong	2/2/2020	2/2/2020	no	Nanchong Municipal Health Commussion	http://wsjsw.nanchong.gov.cn	Ali		nanchong	unknown	unknown	unknown	29/01/2020	29/01/2020	unknown	1/2/2020	unknown	workmate	nanchong	unknown	unknown	2/2/2020	3/2/2020	unknown	7/2/2020	unknown	workmate
neijiang-6	36	male			29/01/2020	29/01/2020	neijiang-11	33	male			neijiang	30/01/2020	30/01/2020	no	Neijiang Municipal Health Commussion	http://wsj.neijiang.gov.cn/	Ali		neijiang	wuhan, Hubei Province	unknown	unknown	29/01/2020	29/01/2020	30/01/2020	31/01/2020	unknown	friend	neijiang	unknown	unknown	30/01/2020	31/01/2020	unknown	2/2/2020	unknown	friend
neijiang-6	36	male			29/01/2020	29/01/2020	neijiang-13	36	male			neijiang	3/2/2020	3/2/2020	no	Neijiang Municipal Health Commussion	http://wsj.neijiang.gov.cn/	Ali		neijiang	wuhan, Hubei Province	unknown	unknown	29/01/2020	29/01/2020	30/01/2020	31/01/2020	unknown	friend	neijiang	unknown	31/01/2020	1/2/2020	1/2/2020	1/2/2020	4/2/2020	unknown	friend
neijiang-6	36	male			29/01/2020	29/01/2020	neijiang-14	34	female			neijiang	3/2/2020	3/2/2020	no	Neijiang Municipal Health Commussion	http://wsj.neijiang.gov.cn/	Ali		neijiang	wuhan, Hubei Province	unknown	unknown	29/01/2020	29/01/2020	30/01/2020	31/01/2020	unknown	friend	neijiang	unknown	31/01/2020	1/2/2020	1/2/2020	1/2/2020	4/2/2020	unknown	friend
neijiang-1	44	female			23/01/2020	23/01/2020	neijiang-2	47	male			neijiang	25/01/2020	25/01/2020	no	Neijiang Municipal Health Commussion	http://wsj.neijiang.gov.cn/	Ali		neijiang	wuhan, Hubei Province	19/01/2020	unknown	23/01/2020	23/01/2020	unknown	25/01/2020	unknown	close contact	neijiang	unknown	24/01/2020	25/01/2020	25/01/2020	unknown	28/01/2020	unknown	close contact
neijiang-1	44	female			23/01/2020	23/01/2020	neijiang-21	22	female			neijiang	11/2/2020	11/2/2020	no	Neijiang Municipal Health Commussion	http://wsj.neijiang.gov.cn/	Ali		neijiang	wuhan, Hubei Province	19/01/2020	unknown	23/01/2020	23/01/2020	unknown	25/01/2020	unknown	aunt	neijiang	unknown	24/01/2020	11/2/2020	11/2/2020	12/2/2020	13/02/2020	unknown	niece
panzhihua-2	49	male			29/01/2020	29/01/2020	panzhihua-10	22	male			panzhihua	30/01/2020	30/01/2020	no	Panzhihua Municipal Health Commussion	http://wjw.panzhihua.gov.cn/	Ali		panzhihua	unknown	24/01/2020	unknown	29/01/2020	29/01/2020	unknown	1/2/2020	unknown	uncle	panzhihua	unknown	30/01/2020	30/01/2020	30/01/2020	unknown	5/2/2020	unknown	nephew
panzhihua-2	49	male			29/01/2020	29/01/2020	panzhihua-12	48	male			panzhihua	7/2/2020	7/2/2020	no	Panzhihua Municipal Health Commussion	http://wjw.panzhihua.gov.cn/	Ali		panzhihua	unknown	24/01/2020	unknown	29/01/2020	29/01/2020	unknown	1/2/2020	unknown	sister's husban	panzhihua	unknown	1/2/2020	7/2/2020	7/2/2020	unknown	9/2/2020	unknown	brother-in-law
panzhihua-2	49	male			29/01/2020	29/01/2020	panzhihua-9	54	male			panzhihua	31/01/2020	31/01/2020	no	Panzhihua Municipal Health Commussion	http://wjw.panzhihua.gov.cn/	Ali		panzhihua	unknown	24/01/2020	unknown	29/01/2020	29/01/2020	unknown	1/2/2020	unknown	brother-in-law	panzhihua	unknown	30/01/2020	31/01/2020	31/01/2020	unknown	2/2/2020	unknown	brother-in-law
suining-12	60	male			5/2/2020	5/2/2020	suining-14	52	male			suining	5/2/2020	5/2/2020	no	Suining Municipal Health Commussion	http://swjw.suining.gov.cn/home	Ali		suining	suining	unknown	unknown	10/2/2020	13/02/2020	unknown	17/02/2020	unknown	brother	suining	unknown	unknown	10/2/2020	15/02/2020	unknown	17/02/2020	unknown	brother
suining-6	35	male			13/01/2020	13/01/2020	suining-5	31	male			suining	28/01/2020	28/01/2020	no	Suining Municipal Health Commussion	http://swjw.suining.gov.cn/home	Ali		suining	wuhan, Hubei Province	16/01/2020	unknown	13/01/2020	7/2/2020	8/2/2020	9/2/2020	unknown	close contact	suining	unknown	unknown	29/01/2020	5/2/2020	7/2/2020	8/2/2020	mild	close contact
tianjin-103	56	male			9/2/2020	9/2/2020	tianjin-105	53	male			tianjin	10/2/2020	10/2/2020	no	Tianjin Municipal Health Commussion	http://wsjk.tj.gov.cn/	Ali		tianjin	tianjin	local	unknown	10/2/2020	11/2/2020	11/2/2020	11/2/2020	unknown	brother	tianjin	local	unknown	10/2/2020	10/2/2020	11/2/2020	11/2/2020	mild	brother
tianjin-37	43	female			25/01/2020	25/01/2020	tianjin-111	54	female			tianjin	25/01/2020	25/01/2020	no	Tianjin Municipal Health Commussion	http://wsjk.tj.gov.cn/	Ali		tianjin	beijing	17/01/2020	unknown	30/01/2020	1/2/2020	1/2/2020	1/2/2020	mild	close contact	tianjin	local	unknown	26/01/2020	2/2/2020	12/2/2020	12/2/2020	mild	close contact
tianjin-51	36	female			27/01/2020	27/01/2020	tianjin-112	42	female			tianjin	4/2/2020	4/2/2020	no	Tianjin Municipal Health Commussion	http://wsjk.tj.gov.cn/	Ali		tianjin	tianjin	local	unknown	1/2/2020	3/2/2020	3/2/2020	3/2/2020	mild	close contact	tianjin	local	unknown	6/2/2020	6/2/2020	12/2/2020	12/2/2020	mild	close contact
tianjin-95	49	male			1/2/2020	1/2/2020	tianjin-116	42	male			tianjin	10/2/2020	10/2/2020	no	Tianjin Municipal Health Commussion	http://wsjk.tj.gov.cn/	Ali		tianjin	tianjin	local	unknown	2/2/2020	10/2/2020	10/2/2020	10/2/2020	mild	brother	tianjin	local	unknown	10/2/2020	10/2/2020	13/02/2020	13/02/2020	unknown	brother
tianjin-93	50	female			7/2/2020	7/2/2020	tianjin-117	64	male			tianjin	11/2/2020	11/2/2020	no	Tianjin Municipal Health Commussion	http://wsjk.tj.gov.cn/	Ali		tianjin	tianjin	local	unknown	9/2/2020	10/2/2020	10/2/2020	10/2/2020	mild	close contact	tianjin	local	unknown	11/2/2020	11/2/2020	13/02/2020	13/02/2020	mild	close contact
tianjin-41	21	female			27/01/2020	27/01/2020	tianjin-122	63	female			tianjin	28/01/2020	28/01/2020	no	Tianjin Municipal Health Commussion	http://wsjk.tj.gov.cn/	Ali		tianjin	wenzhou	26/01/2020	unknown	31/01/2020	1/2/2020	1/2/2020	1/2/2020	mild	relative	tianjin	local	unknown	6/2/2020	6/2/2020	15/02/2020	15/02/2020	unknown	relative
tianjin-93	50	female			7/2/2020	7/2/2020	tianjin-125	9	male			tianjin	15/02/2020	15/02/2020	no	Tianjin Municipal Health Commussion	http://wsjk.tj.gov.cn/	Ali		tianjin	tianjin	local	unknown	9/2/2020	10/2/2020	10/2/2020	10/2/2020	mild	close contact	tianjin	local	unknown	10/2/2020	10/2/2020	17/02/2020	17/02/2020	mild	close contact
tianjin-37	43	female			25/01/2020	25/01/2020	tianjin-128	67	male			tianjin	4/2/2020	4/2/2020	no	Tianjin Municipal Health Commussion	http://wsjk.tj.gov.cn/	Ali		tianjin	beijing	17/01/2020	unknown	30/01/2020	1/2/2020	1/2/2020	1/2/2020	mild	close contact	tianjin	local	unknown	15/02/2020	15/02/2020	18/02/2020	18/02/2020	mild	close contact
tianjin-9	57	male			24/01/2020	24/01/2020	tianjin-21	90	male			tianjin	26/01/2020	26/01/2020	no	Tianjin Municipal Health Commussion	http://wsjk.tj.gov.cn/	Ali		tianjin	wuhan, Hubei Province	17/01/2020	unknown	24/01/2020	25/01/2020	25/01/2020	25/01/2020	severe	relative	tianjin	local	unknown	26/01/2020	27/01/2020	27/01/2020	27/01/2020	severe	relative
tianjin-17	49	male			26/01/2020	26/01/2020	tianjin-33	48	female			tianjin	30/01/2020	30/01/2020	no	Tianjin Municipal Health Commussion	http://wsjk.tj.gov.cn/	Ali		tianjin	tianjin	local	unknown	26/01/2020	27/01/2020	27/01/2020	27/01/2020	mild	relative	tianjin	local	26/01/2020	31/01/2020	1/2/2020	1/2/2020	1/2/2020	mild	relative
tianjin-37	43	female			25/01/2020	25/01/2020	tianjin-34	52	female			tianjin	27/01/2020	27/01/2020	no	Tianjin Municipal Health Commussion	http://wsjk.tj.gov.cn/	Ali		tianjin	beijing	17/01/2020	unknown	30/01/2020	1/2/2020	1/2/2020	1/2/2020	mild	workmate	tianjin	local	unknown	27/01/2020	1/2/2020	1/2/2020	1/2/2020	severe	workmate
tianjin-20	47	male			26/01/2020	26/01/2020	tianjin-35	74	female			tianjin	30/01/2020	30/01/2020	no	Tianjin Municipal Health Commussion	http://wsjk.tj.gov.cn/	Ali		tianjin	tianjin	unknown	unknown	26/01/2020	27/01/2020	27/01/2020	27/01/2020	mild	relative	tianjin	local	unknown	31/01/2020	1/2/2020	1/2/2020	1/2/2020	mild	relative
tianjin-34	52	female			27/01/2020	27/01/2020	tianjin-36	53	male			tianjin	28/01/2020	28/01/2020	no	Tianjin Municipal Health Commussion	http://wsjk.tj.gov.cn/	Ali		tianjin	tianjin	local	unknown	27/01/2020	1/2/2020	1/2/2020	1/2/2020	severe	relative	tianjin	local	unknown	30/01/2020	1/2/2020	1/2/2020	1/2/2020	mild	relative
tianjin-37	43	female			25/01/2020	25/01/2020	tianjin-43	35	female			tianjin	21/01/2020	21/01/2020	no	Tianjin Municipal Health Commussion	http://wsjk.tj.gov.cn/	Ali		tianjin	beijing	17/01/2020	unknown	30/01/2020	1/2/2020	1/2/2020	1/2/2020	mild	workmate	tianjin	local	unknown	21/01/2020	30/01/2020	1/2/2020	2/2/2020	severe	workmate
tianjin-20	47	male			26/01/2020	26/01/2020	tianjin-44	75	male			tianjin	30/01/2020	30/01/2020	no	Tianjin Municipal Health Commussion	http://wsjk.tj.gov.cn/	Ali		tianjin	tianjin	unknown	unknown	26/01/2020	27/01/2020	27/01/2020	27/01/2020	mild	relative	tianjin	local	27/01/2020	1/2/2020	1/2/2020	1/2/2020	2/2/2020	mild	relative
tianjin-37	43	female			25/01/2020	25/01/2020	tianjin-48	26	female			tianjin	29/01/2020	29/01/2020	no	Tianjin Municipal Health Commussion	http://wsjk.tj.gov.cn/	Ali		tianjin	beijing	17/01/2020	unknown	30/01/2020	1/2/2020	1/2/2020	1/2/2020	mild	close contact	tianjin	local	unknown	29/01/2020	2/2/2020	2/2/2020	2/2/2020	mild	close contact
tianjin-50	66	female			2/2/2020	2/2/2020	tianjin-52	37	female			tianjin	30/01/2020	30/01/2020	no	Tianjin Municipal Health Commussion	http://wsjk.tj.gov.cn/	Ali		tianjin	tianjin	local	unknown	2/2/2020	3/2/2020	3/2/2020	3/2/2020	mild	relative	tianjin	local	unknown	1/2/2020	3/2/2020	3/2/2020	3/2/2020	mild	relative
tianjin-9	57	male			24/01/2020	24/01/2020	tianjin-55	56	female			tianjin	1/2/2020	1/2/2020	no	Tianjin Municipal Health Commussion	http://wsjk.tj.gov.cn/	Ali		tianjin	wuhan, Hubei Province	17/01/2020	unknown	24/01/2020	25/01/2020	25/01/2020	25/01/2020	severe	relative	tianjin	local	24/01/2020	unknown	3/2/2020	3/2/2020	3/2/2020	mild	relative
tianjin-32	28	male			23/01/2020	23/01/2020	tianjin-56	32	female			tianjin	1/2/2020	1/2/2020	no	Tianjin Municipal Health Commussion	http://wsjk.tj.gov.cn/	Ali		tianjin	unknown	20/01/2020	unknown	26/01/2020	31/01/2020	31/01/2020	31/01/2020	severe	relative	tianjin	local	31/01/2020	1/2/2020	3/2/2020	3/2/2020	3/2/2020	mild	relative
tianjin-37	43	female			25/01/2020	25/01/2020	tianjin-57	29	male			tianjin	1/2/2020	1/2/2020	no	Tianjin Municipal Health Commussion	http://wsjk.tj.gov.cn/	Ali		tianjin	beijing	17/01/2020	unknown	30/01/2020	1/2/2020	1/2/2020	1/2/2020	mild	close contact	tianjin	local	unknown	2/2/2020	3/2/2020	3/2/2020	3/2/2020	mild	close contact
tianjin-37	43	female			25/01/2020	25/01/2020	tianjin-58	69	female			tianjin	26/01/2020	26/01/2020	no	Tianjin Municipal Health Commussion	http://wsjk.tj.gov.cn/	Ali		tianjin	beijing	17/01/2020	unknown	30/01/2020	1/2/2020	1/2/2020	1/2/2020	mild	close contact	tianjin	local	unknown	2/2/2020	3/2/2020	3/2/2020	3/2/2020	mild	close contact
tianjin-45	61	female			25/01/2020	25/01/2020	tianjin-61	61	male			xiaogan, Hubei Province	31/01/2020	31/01/2020	no	Tianjin Municipal Health Commussion	http://wsjk.tj.gov.cn/	Ali		tianjin	xiaogan, Hubei Province	24/01/2020	24/01/2020	28/01/2020	1/2/2020	1/2/2020	2/2/2020	mild	relative	tianjin	22/01/2020	1/2/2020	31/01/2020	3/2/2020	3/2/2020	4/2/2020	mild	relative
tianjin-27	35	male			28/01/2020	28/01/2020	tianjin-63	66	male			tianjin	1/2/2020	1/2/2020	no	Tianjin Municipal Health Commussion	http://wsjk.tj.gov.cn/	Ali		tianjin	tianjin	local	unknown	28/01/2020	29/01/2020	29/01/2020	29/01/2020	mild	relative	tianjin	local	28/01/2020	1/2/2020	1/2/2020	3/2/2020	4/2/2020	severe	relative
tianjin-51	36	female			27/01/2020	27/01/2020	tianjin-64	31	male			tianjin	1/2/2020	1/2/2020	no	Tianjin Municipal Health Commussion	http://wsjk.tj.gov.cn/	Ali		tianjin	tianjin	local	unknown	1/2/2020	3/2/2020	3/2/2020	3/2/2020	mild	close contact	tianjin	local	unknown	2/2/2020	4/2/2020	4/2/2020	4/2/2020	mild	close contact
tianjin-37	43	female			25/01/2020	25/01/2020	tianjin-66	39	female			tianjin	31/01/2020	31/01/2020	no	Tianjin Municipal Health Commussion	http://wsjk.tj.gov.cn/	Ali		tianjin	beijing	17/01/2020	unknown	30/01/2020	1/2/2020	1/2/2020	1/2/2020	mild	close contact	tianjin	local	unknown	31/01/2020	4/2/2020	4/2/2020	4/2/2020	mild	close contact
tianjin-37	43	female			25/01/2020	25/01/2020	tianjin-68	64	female			tianjin	29/01/2020	29/01/2020	no	Tianjin Municipal Health Commussion	http://wsjk.tj.gov.cn/	Ali		tianjin	beijing	17/01/2020	unknown	30/01/2020	1/2/2020	1/2/2020	1/2/2020	mild	close contact	tianjin	local	unknown	3/2/2020	4/2/2020	4/2/2020	5/2/2020	mild	close contact
tianjin-53	46	female			31/01/2020	31/01/2020	tianjin-69	76	female			tianjin	3/2/2020	3/2/2020	no	Tianjin Municipal Health Commussion	http://wsjk.tj.gov.cn/	Ali		tianjin	tianjin	local	unknown	31/01/2020	3/2/2020	3/2/2020	3/2/2020	mild	relative	tianjin	local	unknown	4/2/2020	4/2/2020	4/2/2020	5/2/2020	mild	relative
tianjin-37	43	female			25/01/2020	25/01/2020	tianjin-71	55	male			tianjin	30/01/2020	30/01/2020	no	Tianjin Municipal Health Commussion	http://wsjk.tj.gov.cn/	Ali		tianjin	beijing	17/01/2020	unknown	30/01/2020	1/2/2020	1/2/2020	1/2/2020	mild	close contact	tianjin	local	unknown	1/2/2020	6/2/2020	6/2/2020	6/2/2020	unknown	close contact
tianjin-37	43	female			25/01/2020	25/01/2020	tianjin-73	60	female			tianjin	23/01/2020	23/01/2020	no	Tianjin Municipal Health Commussion	http://wsjk.tj.gov.cn/	Ali		tianjin	beijing	17/01/2020	unknown	30/01/2020	1/2/2020	1/2/2020	1/2/2020	mild	close contact	tianjin	local	unknown	4/2/2020	6/2/2020	6/2/2020	6/2/2020	unknown	close contact
tianjin-37	43	female			25/01/2020	25/01/2020	tianjin-74	53	male			tianjin	26/01/2020	26/01/2020	no	Tianjin Municipal Health Commussion	http://wsjk.tj.gov.cn/	Ali		tianjin	beijing	17/01/2020	unknown	30/01/2020	1/2/2020	1/2/2020	1/2/2020	mild	close contact	tianjin	local	unknown	1/2/2020	6/2/2020	6/2/2020	6/2/2020	unknown	close contact
tianjin-87	43	female			2/2/2020	2/2/2020	tianjin-75	45	male			tianjin	2/2/2020	2/2/2020	no	Tianjin Municipal Health Commussion	http://wsjk.tj.gov.cn/	Ali		tianjin	tianjin	local	unknown	5/2/2020	8/2/2020	8/2/2020	8/2/2020	unknown	close contact	tianjin	local	unknown	5/2/2020	6/2/2020	6/2/2020	6/2/2020	unknown	close contact
tianjin-37	43	female			25/01/2020	25/01/2020	tianjin-78	56	female			tianjin	27/01/2020	27/01/2020	no	Tianjin Municipal Health Commussion	http://wsjk.tj.gov.cn/	Ali		tianjin	beijing	17/01/2020	unknown	30/01/2020	1/2/2020	1/2/2020	1/2/2020	mild	close contact	tianjin	local	unknown	unknown	unknown	6/2/2020	6/2/2020	unknown	close contact
tianjin-37	43	female			25/01/2020	25/01/2020	tianjin-80	51	female			tianjin	2/2/2020	2/2/2020	no	Tianjin Municipal Health Commussion	http://wsjk.tj.gov.cn/	Ali		tianjin	beijing	17/01/2020	unknown	30/01/2020	1/2/2020	1/2/2020	1/2/2020	mild	close contact	tianjin	local	unknown	5/2/2020	7/2/2020	7/2/2020	7/2/2020	mild	close contact
tianjin-72	65	female			1/2/2020	1/2/2020	tianjin-81	65	male			tianjin	31/01/2020	31/01/2020	no	Tianjin Municipal Health Commussion	http://wsjk.tj.gov.cn/	Ali		tianjin	tianjin	local	unknown	5/2/2020	6/2/2020	6/2/2020	6/2/2020	unknown	close contact	tianjin	local	unknown	5/2/2020	7/2/2020	7/2/2020	7/2/2020	mild	close contact
tianjin-43	35	female			21/01/2020	21/01/2020	tianjin-53	46	female			tianjin	31/01/2020	31/01/2020	no	Tianjin Municipal Health Commussion	http://wsjk.tj.gov.cn/	Ali		tianjin	tianjin	local	unknown	21/01/2020	30/01/2020	1/2/2020	2/2/2020	severe	close contact	tianjin	local	unknown	31/01/2020	3/2/2020	3/2/2020	3/2/2020	mild	close contact
tianjin-53	46	female			31/01/2020	31/01/2020	tianjin-83	42	female			tianjin	3/2/2020	3/2/2020	no	Tianjin Municipal Health Commussion	http://wsjk.tj.gov.cn/	Ali		tianjin	tianjin	local	unknown	31/01/2020	3/2/2020	3/2/2020	3/2/2020	mild	workmate	tianjin	local	2/2/2020	3/2/2020	8/2/2020	8/2/2020	8/2/2020	unknown	workmate
tianjin-43	35	female			21/01/2020	21/01/2020	tianjin-84	36	male			tianjin	4/2/2020	4/2/2020	no	Tianjin Municipal Health Commussion	http://wsjk.tj.gov.cn/	Ali		tianjin	tianjin	local	unknown	21/01/2020	30/01/2020	1/2/2020	2/2/2020	severe	relative	tianjin	local	2/2/2020	4/2/2020	8/2/2020	8/2/2020	8/2/2020	unknown	relative
tianjin-72	65	female			1/2/2020	1/2/2020	tianjin-85	56	female			tianjin	27/01/2020	27/01/2020	no	Tianjin Municipal Health Commussion	http://wsjk.tj.gov.cn/	Ali		tianjin	tianjin	local	unknown	5/2/2020	6/2/2020	6/2/2020	6/2/2020	unknown	close contact	tianjin	local	unknown	4/2/2020	8/2/2020	8/2/2020	8/2/2020	unknown	close contact
tianjin-72	65	female			1/2/2020	1/2/2020	tianjin-86	65	male			tianjin	31/01/2020	31/01/2020	no	Tianjin Municipal Health Commussion	http://wsjk.tj.gov.cn/	Ali		tianjin	tianjin	local	unknown	5/2/2020	6/2/2020	6/2/2020	6/2/2020	unknown	relative	tianjin	local	unknown	5/2/2020	8/2/2020	8/2/2020	8/2/2020	unknown	relative
tianjin-70	34	male			22/01/2020	22/01/2020	tianjin-88	42	male			tianjin	28/01/2020	28/01/2020	no	Tianjin Municipal Health Commussion	http://wsjk.tj.gov.cn/	Ali		tianjin	tianjin	31/01/2020	unknown	23/01/2020	4/2/2020	4/2/2020	5/2/2020	severe	brother	tianjin	local	unknown	29/01/2020	7/2/2020	7/2/2020	7/2/2020	unknown	brother
tianjin-37	43	female			25/01/2020	25/01/2020	tianjin-89	34	female			tianjin	4/2/2020	4/2/2020	no	Tianjin Municipal Health Commussion	http://wsjk.tj.gov.cn/	Ali		tianjin	beijing	17/01/2020	unknown	30/01/2020	1/2/2020	1/2/2020	1/2/2020	mild	workmate	tianjin	local	31/01/2020	7/2/2020	9/2/2020	9/2/2020	9/2/2020	mild	workmate
tianjin-37	43	female			25/01/2020	25/01/2020	tianjin-92	63	female			tianjin	30/01/2020	30/01/2020	no	Tianjin Municipal Health Commussion	http://wsjk.tj.gov.cn/	Ali		tianjin	beijing	17/01/2020	unknown	30/01/2020	1/2/2020	1/2/2020	1/2/2020	mild	close contact	tianjin	local	unknown	7/2/2020	10/2/2020	10/2/2020	10/2/2020	mild	close contact
tianjin-75	45	male			2/2/2020	2/2/2020	tianjin-94	22	female			tianjin	6/2/2020	6/2/2020	no	Tianjin Municipal Health Commussion	http://wsjk.tj.gov.cn/	Ali		tianjin	tianjin	local	unknown	5/2/2020	6/2/2020	6/2/2020	6/2/2020	unknown	relative	tianjin	local	unknown	6/2/2020	6/2/2020	10/2/2020	10/2/2020	mild	relative
yinchuan-2	27	male			25/01/2020	25/01/2020	yinchuan-3	32	male			wuhan, Hubei Province	25/01/2020	25/01/2020	no	Yinchuan Municipal Health Commussion	http://wjw.yinchuan.gov.cn	Ali		yinchuan	wuhan, Hubei Province	20/01/2020	unknown	25/01/2020	25/01/2020	26/01/2020	27/01/2020	unknown	close contact	yinchuan	19/01/2020	unknown	25/01/2020	25/01/2020	26/01/2020	27/01/2020	unknown	close contact
ah_suzhou-12	38	male			1/2/2020	1/2/2020	ah_suzhou-23	44	male			suzhou	5/2/2020	5/2/2020	no	The People_ Government of Suzhou Municipality	http://www.ahsz.gov.cn	Ali		suzhou	wuhan, Hubei Province	23/01/2020	26/01/2020	1/2/2020	1/2/2020	3/2/2020	4/2/2020	mild	close contact	suzhou	?	unknown	5/2/2020	5/2/2020	10/2/2020	11/2/2020	mild	close contact
ah_suzhou-23	44	male			5/2/2020	5/2/2020	ah_suzhou-29	34	male			suzhou	9/2/2020	9/2/2020	no	The People_ Government of Suzhou Municipality	http://www.ahsz.gov.cn	Ali		suzhou	suzhou	unknown	unknown	5/2/2020	5/2/2020	10/2/2020	11/2/2020	mild	workmate	suzhou	?	unknown	9/2/2020	9/2/2020	16/02/2020	17/02/2020	mild	workmate
anqing-59	57	male			27/01/2020	27/01/2020	anqing-61	54	male			anqing	1/2/2020	1/2/2020	no	Anqing Municipal Health Commussion	Official Weibo of Anyang municipal People's government	Ali		anqing	anqing	unknown	unknown	28/01/2020	5/2/2020	6/2/2020	7/2/2020	mild	brother	anqing	?	unknown	5/2/2020	unknown	6/2/2020	7/2/2020	mild	brother
bengbu-67	59	male			29/01/2020	29/01/2020	bengbu-100	53	male			bangbu	5/2/2020	5/2/2020	no	The People_ Government of Bengbu Municipality	http://www.bengbu.gov.cn	Ali		bengbu	bengbu	unknown	unknown	2/2/2020	unknown	8/2/2020	9/2/2020	mild	close contact	bangbu	?	unknown	5/2/2020	unknown	11/2/2020	12/2/2020	mild	close contact
bengbu-67	59	male			29/01/2020	29/01/2020	bengbu-101	50	female			bangbu	5/2/2020	5/2/2020	no	The People_ Government of Bengbu Municipality	http://www.bengbu.gov.cn	Ali		bengbu	bengbu	unknown	unknown	2/2/2020	unknown	8/2/2020	9/2/2020	mild	close contact	bangbu	?	unknown	5/2/2020	unknown	11/2/2020	12/2/2020	mild	close contact
bengbu-71	82	female			24/01/2020	24/01/2020	bengbu-86	31	female			bangbu	31/01/2020	31/01/2020	no	The People_ Government of Bengbu Municipality	http://www.bengbu.gov.cn	Ali		bengbu	bengbu	unknown	unknown	6/2/2020	unknown	8/2/2020	9/2/2020	mild	grandmother	bangbu	?	unknown	31/01/2020	unknown	9/2/2020	10/2/2020	mild	granddaughter-in-law
bengbu-144	53	female			30/01/2020	30/01/2020	bengbu-89	48	female			bangbu	7/2/2020	7/2/2020	no	The People_ Government of Bengbu Municipality	http://www.bengbu.gov.cn	Ali		bengbu	bengbu	unknown	unknown	5/2/2020	6/2/2020	6/2/2020	7/2/2020	mild	sister	bangbu	?	unknown	7/2/2020	unknown	10/2/2020	11/2/2020	mild	sister
bengbu-79	55	female			6/2/2020	6/2/2020	bengbu-93	63	female			bangbu	7/2/2020	7/2/2020	no	The People_ Government of Bengbu Municipality	http://www.bengbu.gov.cn	Ali		bengbu	bengbu	unknown	unknown	6/2/2020	unknown	9/2/2020	10/2/2020	mild	brother's wife	bangbu	?	unknown	8/2/2020	unknown	10/2/2020	11/2/2020	mild	sister
bengbu-67	59	male			29/01/2020	29/01/2020	bengbu-95	52	female			bangbu	6/2/2020	6/2/2020	no	The People_ Government of Bengbu Municipality	http://www.bengbu.gov.cn	Ali		bengbu	bengbu	unknown	unknown	2/2/2020	unknown	8/2/2020	9/2/2020	mild	close contact	bangbu	?	unknown	8/2/2020	unknown	11/2/2020	12/2/2020	mild	close contact
bengbu-85	58	male			4/2/2020	4/2/2020	bengbu-98	64	male			bangbu	6/2/2020	6/2/2020	no	The People_ Government of Bengbu Municipality	http://www.bengbu.gov.cn	Ali		bengbu	bengbu	unknown	unknown	4/2/2020	unknown	9/2/2020	10/2/2020	mild	brother	bangbu	?	unknown	8/2/2020	unknown	11/2/2020	12/2/2020	mild	brother
chizhou-16	55	male			27/01/2020	27/01/2020	chizhou-13	47	male			chizhou	11/2/2020	11/2/2020	no	The People_ Government of Chizhou Municipality	http://www.chizhou.gov.cn	Ali		chizhou	chizhou	unknown	unknown	1/2/2020	27/01/2020	3/2/2020	4/2/2020	mild	close contact	chizhou	?	unknown	11/2/2020	13/02/2020	13/02/2020	14/02/2020	mild	close contact
chizhou-5	61	female			23/01/2020	23/01/2020	chizhou-3	36	female			wuhan, Hubei Province	25/01/2020	25/01/2020	no	The People_ Government of Chizhou Municipality	http://www.chizhou.gov.cn	Ali		chizhou	wuhan, Hubei Province	23/01/2020	23/01/2020	29/01/2020	29/01/2020	1/2/2020	2/2/2020	mild	close contact	chizhou	23/01/2020	unknown	29/01/2020	25/01/2020	30/01/2020	31/01/2020	mild	close contact
chizhou-3	36	female			25/01/2020	25/01/2020	chizhou-14	62	male			chizhou	27/01/2020	27/01/2020	no	The People_ Government of Chizhou Municipality	http://www.chizhou.gov.cn	Ali		chizhou	wuhan, Hubei Province	23/01/2020	unknown	29/01/2020	25/01/2020	30/01/2020	31/01/2020	mild	close contact	chizhou	?	unknown	31/01/2020	31/01/2020	3/2/2020	4/2/2020	mild	close contact
fuyang-105	52	female			26/01/2020	26/01/2020	fuyang-106	47	female			unknown	28/01/2020	28/01/2020	no	Fuyang Municipal Health Commussion	http://wjw.fy.gov.cn/	Ali		fuyang	fuyang	unknown	unknown	9/2/2020	11/2/2020	11/2/2020	12/2/2020	mild	friend	fuyang	unknown	unknown	9/2/2020	11/2/2020	12/2/2020	13/02/2020	mild	friend
fuyang-56	47	female			25/01/2020	25/01/2020	fuyang-108	68	male			unknown	9/2/2020	9/2/2020	no	Fuyang Municipal Health Commussion	http://wjw.fy.gov.cn/	Ali		fuyang	fuyang	unknown	unknown	1/2/2020	1/2/2020	3/2/2020	4/2/2020	mild	close contact	fuyang	unknown	6/2/2020	9/2/2020	9/2/2020	12/2/2020	13/02/2020	mild	close contact
fuyang-146	63	female			27/01/2020	27/01/2020	fuyang-117	54	male			wenzhou	10/2/2020	10/2/2020	no	Fuyang Municipal Health Commussion	http://wjw.fy.gov.cn/	Ali		fuyang	fuyang	unknown	unknown	4/2/2020	4/2/2020	6/2/2020	7/2/2020	mild	sister	fuyang	15/01/2020	7/2/2020	10/2/2020	10/2/2020	14/02/2020	15/02/2020	mild	brother-in-law
fuyang-105	52	female			26/01/2020	26/01/2020	fuyang-118	48	male			fuyang	6/2/2020	6/2/2020	no	Fuyang Municipal Health Commussion	http://wjw.fy.gov.cn/	Ali		fuyang	fuyang	unknown	unknown	9/2/2020	11/2/2020	11/2/2020	12/2/2020	mild	friend	fuyang	unknown	unknown	12/2/2020	12/2/2020	15/02/2020	16/02/2020	mild	friend
fuyang-118	48	male			6/2/2020	6/2/2020	fuyang-122	46	male			fuyang	15/02/2020	15/02/2020	no	Fuyang Municipal Health Commussion	http://wjw.fy.gov.cn/	Ali		fuyang	fuyang	unknown	unknown	12/2/2020	12/2/2020	15/02/2020	16/02/2020	mild	friend	fuyang	unknown	unknown	15/02/2020	15/02/2020	18/02/2020	19/02/2020	mild	friend
fuyang-130	48	male			13/01/2020	13/01/2020	fuyang-131	47	female			fuyang	18/01/2020	18/01/2020	no	Fuyang Municipal Health Commussion	http://wjw.fy.gov.cn/	Ali		fuyang	wuhan, Hubei Province	10/1/2020	unknown	24/01/2020	27/01/2020	27/01/2020	28/01/2020	mild	brother	fuyang	?	unknown	24/01/2020	27/01/2020	27/01/2020	28/01/2020	mild	sister
fuyang-7	21	female			18/01/2020	18/01/2020	fuyang-19	27	female			wuhan, Hubei Province	29/01/2020	29/01/2020	no	Fuyang Municipal Health Commussion	http://wjw.fy.gov.cn/	Ali		fuyang	wuhan, Hubei Province	19/01/2020	unknown	24/01/2020	24/01/2020	30/01/2020	31/01/2020	severe	sister-in-law	fuyang	?	unknown	29/01/2020	29/01/2020	31/01/2020	1/2/2020	mild	sister-in-law
fuyang-28	45	female			26/01/2020	26/01/2020	fuyang-61	55	male			fuyang	28/01/2020	28/01/2020	no	Fuyang Municipal Health Commussion	http://wjw.fy.gov.cn/	Ali		fuyang	fuyang	unknown	unknown	30/01/2020	1/2/2020	1/2/2020	2/2/2020	mild	brother's wife	fuyang	?	unknown	2/2/2020	3/2/2020	4/2/2020	5/2/2020	mild	brother-in-law
fuyang-15	44	male			20/01/2020	20/01/2020	fuyang-72	25	male			fuyang	31/01/2020	31/01/2020	no	Fuyang Municipal Health Commussion	http://wjw.fy.gov.cn/	Ali		fuyang	fuyang	unknown	unknown	28/01/2020	29/01/2020	30/01/2020	31/01/2020	mild	uncle	fuyang	23/01/2020	unknown	3/2/2020	3/2/2020	5/2/2020	6/2/2020	mild	nephew
fuyang-55	49	male			28/01/2020	28/01/2020	fuyang-83	47	female			fuyang	6/2/2020	6/2/2020	no	Fuyang Municipal Health Commussion	http://wjw.fy.gov.cn/	Ali		fuyang	hangzhou	19/01/2020	unknown	1/2/2020	1/2/2020	3/2/2020	4/2/2020	mild	close contact	fuyang	?	unknown	6/2/2020	6/2/2020	8/2/2020	9/2/2020	mild	close contact
fuyang-73	45	male			5/2/2020	5/2/2020	fuyang-93	58	female			fuyang	5/2/2020	5/2/2020	no	Fuyang Municipal Health Commussion	http://wjw.fy.gov.cn/	Ali		fuyang	unknown	15/01/2020	unknown	5/2/2020	5/2/2020	7/2/2020	8/2/2020	mild	close contact	fuyang	?	unknown	8/2/2020	8/2/2020	10/2/2020	11/2/2020	mild	close contact
fuyang-74	42	male			30/01/2020	30/01/2020	fuyang-96	25	female			fuyang	4/2/2020	4/2/2020	no	Fuyang Municipal Health Commussion	http://wjw.fy.gov.cn/	Ali		fuyang	fuyang	unknown	unknown	4/2/2020	4/2/2020	7/2/2020	8/2/2020	mild	uncle	fuyang	?	unknown	8/2/2020	8/2/2020	10/2/2020	11/2/2020	mild	niece
haozhou-104	13	female			10/2/2020	10/2/2020	haozhou-105	12	male			haozhou	11/2/2020	11/2/2020	no	The People_ Government of Haozhou Municipality	http://www.bozhou.gov.cn	Ali		haozhou	hefei	31/01/2020	unknown	10/2/2020	10/2/2020	10/2/2020	14/02/2020	mild	sister	haozhou	?	unknown	12/2/2020	12/2/2020	11/2/2020	14/02/2020	unknown	sister
haozhou-5	35	male			19/01/2020	19/01/2020	haozhou-15	48	male			haozhou	26/01/2020	26/01/2020	no	The People_ Government of Haozhou Municipality	http://www.bozhou.gov.cn	Ali		haozhou	xiangtan	12/1/2020	unknown	22/01/2020	22/01/2020	25/01/2020	26/01/2020	mild	close contact	haozhou	?	unknown	26/01/2020	26/01/2020	28/01/2020	29/01/2020	mild	close contact
haozhou-15	48	male			26/01/2020	26/01/2020	haozhou-16	50	female			haozhou	26/01/2020	26/01/2020	no	The People_ Government of Haozhou Municipality	http://www.bozhou.gov.cn	Ali		haozhou	haozhou	unknown	unknown	26/01/2020	26/01/2020	28/01/2020	29/01/2020	mild	close contact	haozhou	?	unknown	27/01/2020	27/01/2020	29/01/2020	30/01/2020	mild	close contact
haozhou-15	48	male			26/01/2020	26/01/2020	haozhou-24	22	male			haozhou	27/01/2020	27/01/2020	no	The People_ Government of Haozhou Municipality	http://www.bozhou.gov.cn	Ali		haozhou	haozhou	unknown	unknown	26/01/2020	26/01/2020	28/01/2020	29/01/2020	mild	close contact	haozhou	?	unknown	29/01/2020	29/01/2020	31/01/2020	1/2/2020	mild	close contact
haozhou-15	48	male			26/01/2020	26/01/2020	haozhou-25	89	female			haozhou	27/01/2020	27/01/2020	no	The People_ Government of Haozhou Municipality	http://www.bozhou.gov.cn	Ali		haozhou	haozhou	unknown	unknown	26/01/2020	26/01/2020	28/01/2020	29/01/2020	mild	close contact	haozhou	?	unknown	29/01/2020	29/01/2020	31/01/2020	1/2/2020	mild	close contact
haozhou-17	43	female			22/01/2020	22/01/2020	haozhou-18	21	female			haozhou	22/01/2020	22/01/2020	no	The People_ Government of Haozhou Municipality	http://www.bozhou.gov.cn	Ali		haozhou	haozhou	unknown	unknown	27/01/2020	27/01/2020	29/01/2020	30/01/2020	mild	relative	haozhou	?	unknown	unknown	unknown	29/01/2020	30/01/2020	mild	relative
haozhou-17	43	female			22/01/2020	22/01/2020	haozhou-28	54	female			haozhou	30/01/2020	30/01/2020	no	The People_ Government of Haozhou Municipality	http://www.bozhou.gov.cn	Ali		haozhou	haozhou	unknown	unknown	27/01/2020	27/01/2020	29/01/2020	30/01/2020	mild	close contact	haozhou	?	unknown	30/01/2020	30/01/2020	1/2/2020	2/2/2020	mild	close contact
haozhou-17	43	female			22/01/2020	22/01/2020	haozhou-19	18	male			haozhou	26/01/2020	26/01/2020	no	The People_ Government of Haozhou Municipality	http://www.bozhou.gov.cn	Ali		haozhou	haozhou	unknown	unknown	27/01/2020	27/01/2020	29/01/2020	30/01/2020	mild	relative	haozhou	?	unknown	unknown	unknown	29/01/2020	30/01/2020	mild	relative
haozhou-12	71	male			25/01/2020	25/01/2020	haozhou-30	42	female			haozhou	28/01/2020	28/01/2020	no	The People_ Government of Haozhou Municipality	http://www.bozhou.gov.cn	Ali		haozhou	wuhan, Hubei Province	14/01/2020	unknown	26/01/2020	26/01/2020	29/01/2020	29/01/2020	mild	close contact	haozhou	?	unknown	29/01/2020	29/01/2020	1/2/2020	2/2/2020	mild	close contact
haozhou-28	54	female			30/01/2020	30/01/2020	haozhou-32	13	female			haozhou	28/01/2020	28/01/2020	no	The People_ Government of Haozhou Municipality	http://www.bozhou.gov.cn	Ali		haozhou	haozhou	unknown	unknown	30/01/2020	30/01/2020	1/2/2020	2/2/2020	mild	close contact	haozhou	?	unknown	30/01/2020	30/01/2020	2/2/2020	3/2/2020	mild	close contact
haozhou-15	48	male			26/01/2020	26/01/2020	haozhou-39	47	male			haozhou	23/01/2020	23/01/2020	no	The People_ Government of Haozhou Municipality	http://www.bozhou.gov.cn	Ali		haozhou	haozhou	unknown	unknown	26/01/2020	26/01/2020	28/01/2020	29/01/2020	mild	close contact	haozhou	?	unknown	29/01/2020	29/01/2020	2/2/2020	3/2/2020	mild	close contact
haozhou-12	71	male			25/01/2020	25/01/2020	haozhou-40	72	female			haozhou	28/01/2020	28/01/2020	no	The People_ Government of Haozhou Municipality	http://www.bozhou.gov.cn	Ali		haozhou	wuhan, Hubei Province	14/01/2020	unknown	26/01/2020	26/01/2020	29/01/2020	29/01/2020	mild	close contact	haozhou	?	unknown	28/01/2020	28/01/2020	3/2/2020	4/2/2020	mild	close contact
haozhou-8	40	female			21/01/2020	21/01/2020	haozhou-47	25	male			haozhou	26/01/2020	26/01/2020	no	The People_ Government of Haozhou Municipality	http://www.bozhou.gov.cn	Ali		haozhou	wuhan, Hubei Province	15/01/2020	unknown	23/01/2020	23/01/2020	27/01/2020	28/01/2020	mild	close contact	haozhou	?	unknown	29/01/2020	31/01/2020	3/2/2020	4/2/2020	mild	close contact
haozhou-30	42	female			28/01/2020	28/01/2020	haozhou-74	38	male			haozhou	27/01/2020	27/01/2020	no	The People_ Government of Haozhou Municipality	http://www.bozhou.gov.cn	Ali		haozhou	haozhou	unknown	unknown	29/01/2020	29/01/2020	1/2/2020	2/2/2020	mild	close contact	haozhou	?	unknown	3/2/2020	3/2/2020	7/2/2020	8/2/2020	mild	close contact
haozhou-12	71	male			25/01/2020	25/01/2020	haozhou-75	43	male			haozhou	2/2/2020	2/2/2020	no	The People_ Government of Haozhou Municipality	http://www.bozhou.gov.cn	Ali		haozhou	wuhan, Hubei Province	14/01/2020	unknown	26/01/2020	26/01/2020	29/01/2020	29/01/2020	mild	close contact	haozhou	?	unknown	5/2/2020	5/2/2020	7/2/2020	8/2/2020	mild	close contact
haozhou-26	47	male			29/01/2020	29/01/2020	haozhou-78	56	male			haozhou	31/01/2020	31/01/2020	no	The People_ Government of Haozhou Municipality	http://www.bozhou.gov.cn	Ali		haozhou	haozhou	unknown	unknown	29/01/2020	29/01/2020	1/2/2020	2/2/2020	mild	close contact	haozhou	?	unknown	5/2/2020	5/2/2020	7/2/2020	8/2/2020	mild	close contact
haozhou-26	47	male			29/01/2020	29/01/2020	haozhou-84	21	male			haozhou	3/2/2020	3/2/2020	no	The People_ Government of Haozhou Municipality	http://www.bozhou.gov.cn	Ali		haozhou	haozhou	unknown	unknown	29/01/2020	29/01/2020	1/2/2020	2/2/2020	mild	close contact	haozhou	?	unknown	7/2/2020	7/2/2020	8/2/2020	9/2/2020	unknown	close contact
haozhou-30	42	female			28/01/2020	28/01/2020	haozhou-86	35	female			haozhou	27/01/2020	27/01/2020	no	The People_ Government of Haozhou Municipality	http://www.bozhou.gov.cn	Ali		haozhou	haozhou	unknown	unknown	29/01/2020	29/01/2020	1/2/2020	2/2/2020	mild	relative	haozhou	?	unknown	6/2/2020	6/2/2020	8/2/2020	9/2/2020	unknown	relative
haozhou-26	47	male			29/01/2020	29/01/2020	haozhou-88	44	female			haozhou	29/01/2020	29/01/2020	no	The People_ Government of Haozhou Municipality	http://www.bozhou.gov.cn	Ali		haozhou	haozhou	unknown	unknown	29/01/2020	29/01/2020	1/2/2020	2/2/2020	mild	close contact	haozhou	?	unknown	29/01/2020	7/2/2020	9/2/2020	10/2/2020	mild	close contact
haozhou-26	47	male			29/01/2020	29/01/2020	haozhou-90	12	female			haozhou	30/01/2020	30/01/2020	no	The People_ Government of Haozhou Municipality	http://www.bozhou.gov.cn	Ali		haozhou	haozhou	unknown	unknown	29/01/2020	29/01/2020	1/2/2020	2/2/2020	mild	close contact	haozhou	?	unknown	7/2/2020	7/2/2020	9/2/2020	10/2/2020	mild	close contact
hefei-7	40	female			15/01/2020	15/01/2020	hefei-16	40	male			hefei	24/01/2020	24/01/2020	no	Hefei Municipal Health Commussion	http://wjw.hefei.gov.cn/	Ali		hefei	hefei	unknown	unknown	21/01/2020	24/01/2020	24/01/2020	27/01/2020	mild	close contact	hefei	?	unknown	24/01/2020	27/01/2020	27/01/2020	28/01/2020	mild	close contact
hefei-17	22	male			22/01/2020	22/01/2020	hefei-18	22	male			hefei	24/01/2020	24/01/2020	no	Hefei Municipal Health Commussion	http://wjw.hefei.gov.cn/	Ali		hefei	wuhan, Hubei Province	19/01/2020	unknown	23/01/2020	28/01/2020	28/01/2020	29/01/2020	mild	schoolmate	hefei	?	unknown	25/01/2020	28/01/2020	28/01/2020	29/01/2020	mild	schoolmate
hefei-17	22	male			22/01/2020	22/01/2020	hefei-19	22	male			hefei	25/01/2020	25/01/2020	no	Hefei Municipal Health Commussion	http://wjw.hefei.gov.cn/	Ali		hefei	wuhan, Hubei Province	19/01/2020	unknown	23/01/2020	28/01/2020	28/01/2020	29/01/2020	mild	schoolmate	hefei	6/1/2020	unknown	27/01/2020	28/01/2020	28/01/2020	29/01/2020	mild	schoolmate
hefei-17	22	male			22/01/2020	22/01/2020	hefei-20	22	male			hefei	24/01/2020	24/01/2020	no	Hefei Municipal Health Commussion	http://wjw.hefei.gov.cn/	Ali		hefei	wuhan, Hubei Province	19/01/2020	unknown	23/01/2020	28/01/2020	28/01/2020	29/01/2020	mild	schoolmate	hefei	?	unknown	25/01/2020	28/01/2020	28/01/2020	29/01/2020	mild	schoolmate
hefei-17	22	male			22/01/2020	22/01/2020	hefei-21	24	male			hefei	22/01/2020	22/01/2020	no	Hefei Municipal Health Commussion	http://wjw.hefei.gov.cn/	Ali		hefei	wuhan, Hubei Province	19/01/2020	unknown	23/01/2020	28/01/2020	28/01/2020	29/01/2020	mild	schoolmate	hefei	?	unknown	25/01/2020	28/01/2020	28/01/2020	29/01/2020	mild	schoolmate
hefei-5	50	female			10/1/2020	10/1/2020	hefei-7	40	female			hefei	15/01/2020	15/01/2020	no	Hefei Municipal Health Commussion	http://wjw.hefei.gov.cn/	Ali		hefei	wuhan, Hubei Province	7/1/2020	unknown	21/01/2020	23/01/2020	23/01/2020	27/01/2020	mild	close contact	hefei	?	unknown	21/01/2020	24/01/2020	24/01/2020	27/01/2020	mild	close contact
hefei-5	50	female			10/1/2020	10/1/2020	hefei-8	51	male			hefei	17/01/2020	17/01/2020	no	Hefei Municipal Health Commussion	http://wjw.hefei.gov.cn/	Ali		hefei	wuhan, Hubei Province	7/1/2020	unknown	21/01/2020	23/01/2020	23/01/2020	27/01/2020	mild	close contact	hefei	?	unknown	21/01/2020	24/01/2020	24/01/2020	27/01/2020	mild	close contact
huaibei-6	45	female			9/1/2020	9/1/2020	huaibei-15	38	female			huaibei	26/01/2020	26/01/2020	no	Huaibei Municipal Health Commussion	http://wjw.huaibei.gov.cn/xxfb/tzgg/index.html	Ali		huaibei	wuhan, Hubei Province	5/1/2020	unknown	24/01/2020	29/01/2020	unknown	1/2/2020	unknown	close contact	huaibei	?	unknown	3/2/2020	3/2/2020	5/2/2020	6/2/2020	unknown	close contact
huaibei-10	17	male			1/2/2020	1/2/2020	huaibei-17	58	female			huaibei	3/2/2020	3/2/2020	no	Huaibei Municipal Health Commussion	http://wjw.huaibei.gov.cn/xxfb/tzgg/index.html	Ali		huaibei	beijing	14/01/2020	31/01/2020	1/2/2020	1/2/2020	3/2/2020	4/2/2020	unknown	nephew	huaibei	?	unknown	3/2/2020	3/2/2020	5/2/2020	6/2/2020	unknown	aunt
huaibei-19	56	female			25/01/2020	25/01/2020	huaibei-18	37	female			huaibei	27/01/2020	27/01/2020	no	Huaibei Municipal Health Commussion	http://wjw.huaibei.gov.cn/xxfb/tzgg/index.html	Ali		huaibei	huaibei	unknown	unknown	29/01/2020	4/2/2020	6/2/2020	7/2/2020	unknown	close contact	huaibei	?	unknown	2/2/2020	6/2/2020	6/2/2020	7/2/2020	unknown	close contact
huaibei-10	17	male			1/2/2020	1/2/2020	huaibei-9	17	male			huaibei	1/2/2020	1/2/2020	no	Huaibei Municipal Health Commussion	http://wjw.huaibei.gov.cn/xxfb/tzgg/index.html	Ali		huaibei	beijing	14/01/2020	31/01/2020	1/2/2020	1/2/2020	3/2/2020	4/2/2020	unknown	brother	huaibei	?	31/01/2020	1/2/2020	1/2/2020	3/2/2020	4/2/2020	unknown	brother
huangshan-5	unknown	unknown			20/01/2020	20/01/2020	huangshan-6	unknown	unknown			wuhan, Hubei Province	21/01/2020	21/01/2020	no	Huangshan Municipal Health Commussion	http://wjw.huangshan.gov.cn	Ali		huangshan	wuhan, Hubei Province	22/01/2020	unknown	26/01/2020	26/01/2020	28/01/2020	29/01/2020	mild	relative	huangshan	22/01/2020	unknown	26/01/2020	26/01/2020	28/01/2020	29/01/2020	mild	relative
liuan-2	38	male			18/01/2020	18/01/2020	liuan-34	37	female			liuan	2/2/2020	2/2/2020	no	Lu'an Municipal People's Government	http://www.luan.gov.cn/zwzx/jrla/zxyw/index.html	Ali		liuan	wuhan, Hubei Province	17/01/2020	unknown	22/01/2020	23/01/2020	23/01/2020	26/01/2020	mild	brother	liuan	?	unknown	2/2/2020	2/2/2020	4/2/2020	5/2/2020	mild	sister
liuan-41	22	male			22/01/2020	22/01/2020	liuan-46	42	male			liuan	6/2/2020	6/2/2020	no	Lu'an Municipal People's Government	http://www.luan.gov.cn/zwzx/jrla/zxyw/index.html	Ali		liuan	wuhan, Hubei Province	19/01/2020	unknown	5/2/2020	5/2/2020	6/2/2020	7/2/2020	mild	close contact	liuan	?	unknown	6/2/2020	7/2/2020	7/2/2020	8/2/2020	mild	close contact
liuan-41	22	male			22/01/2020	22/01/2020	liuan-53	42	male			changzhou	6/2/2020	6/2/2020	no	Lu'an Municipal People's Government	http://www.luan.gov.cn/zwzx/jrla/zxyw/index.html	Ali		liuan	wuhan, Hubei Province	19/01/2020	unknown	5/2/2020	5/2/2020	6/2/2020	7/2/2020	mild	close contact	liuan	23/01/2020	unknown	7/2/2020	8/2/2020	8/2/2020	9/2/2020	unknown	close contact
liuan-29	41	male			27/01/2020	27/01/2020	liuan-54	29	male			liuan	7/2/2020	7/2/2020	no	Lu'an Municipal People's Government	http://www.luan.gov.cn/zwzx/jrla/zxyw/index.html	Ali		liuan	liuan	unknown	unknown	2/2/2020	3/2/2020	3/2/2020	4/2/2020	mild	close contact	liuan	?	3/2/2020	7/2/2020	7/2/2020	8/2/2020	9/2/2020	unknown	close contact
liuan-46	42	male			6/2/2020	6/2/2020	liuan-55	41	male			hefei	3/2/2020	3/2/2020	no	Lu'an Municipal People's Government	http://www.luan.gov.cn/zwzx/jrla/zxyw/index.html	Ali		liuan	liuan	unknown	unknown	6/2/2020	7/2/2020	7/2/2020	8/2/2020	mild	friend	liuan	7/2/2020	3/2/2020	7/2/2020	7/2/2020	9/2/2020	10/2/2020	unknown	friend
liuan-23	36	male			29/01/2020	29/01/2020	liuan-56	78	female			liuan	28/01/2020	28/01/2020	no	Lu'an Municipal People's Government	http://www.luan.gov.cn/zwzx/jrla/zxyw/index.html	Ali		liuan	chengdu	20/01/2020	unknown	1/2/2020	3/2/2020	3/2/2020	4/2/2020	mild	close contact	liuan	?	unknown	7/2/2020	9/2/2020	9/2/2020	10/2/2020	unknown	close contact
liuan-20	33	male			26/01/2020	26/01/2020	liuan-59	23	male			liuan	6/2/2020	6/2/2020	no	Lu'an Municipal People's Government	http://www.luan.gov.cn/zwzx/jrla/zxyw/index.html	Ali		liuan	xinyang	25/01/2020	unknown	31/01/2020	2/2/2020	2/2/2020	3/2/2020	mild	sister's husban	liuan	?	1/2/2020	7/2/2020	7/2/2020	10/2/2020	11/2/2020	unknown	brother-in-law
liuan-65	31	male			13/02/2020	13/02/2020	liuan-68	50	male			liuan	15/02/2020	15/02/2020	no	Lu'an Municipal People's Government	http://www.luan.gov.cn/zwzx/jrla/zxyw/index.html	Ali		liuan	tianjin	18/01/2020	unknown	13/02/2020	15/02/2020	15/02/2020	16/02/2020	unknown	close contact	liuan	?	unknown	15/02/2020	16/02/2020	16/02/2020	17/02/2020	unknown	close contact
liuan-32	33	female			2/2/2020	2/2/2020	liuan-69	43	female			liuan	17/02/2020	17/02/2020	no	Lu'an Municipal People's Government	http://www.luan.gov.cn/zwzx/jrla/zxyw/index.html	Ali		liuan	liuan	unknown	unknown	3/2/2020	4/2/2020	4/2/2020	5/2/2020	mild	close contact	liuan	unknown	15/02/2020	16/02/2020	18/02/2020	18/02/2020	19/02/2020	unknown	close contact
maanshan-28	55	male			29/01/2020	29/01/2020	maanshan-21	52	male			maanshan	24/01/2020	24/01/2020	no	The People_ Government of Maanshan Municipality	http://www.mas.gov.cn	Ali		maanshan	wuhan, Hubei Province	16/01/2020	24/01/2020	1/2/2020	29/01/2020	2/2/2020	3/2/2020	unknown	father of one's daughter-in-law or son-in-law	maanshan	unknown	unknown	29/01/2020	31/01/2020	31/01/2020	1/2/2020	unknown	father of one's daughter-in-law or son-in-law
maanshan-28	55	male			29/01/2020	29/01/2020	maanshan-22	52	female			maanshan	23/01/2020	23/01/2020	no	The People_ Government of Maanshan Municipality	http://www.mas.gov.cn	Ali		maanshan	wuhan, Hubei Province	16/01/2020	24/01/2020	1/2/2020	29/01/2020	2/2/2020	3/2/2020	unknown	father of one's daughter-in-law or son-in-law	maanshan	unknown	unknown	29/01/2020	31/01/2020	31/01/2020	1/2/2020	unknown	mother of one's daughter-in-law or son-in-law
maanshan-21	52	male			24/01/2020	24/01/2020	maanshan-26	37	female			maanshan	29/01/2020	29/01/2020	no	The People_ Government of Maanshan Municipality	http://www.mas.gov.cn	Ali		maanshan	maanshan	unknown	unknown	29/01/2020	31/01/2020	31/01/2020	1/2/2020	unknown	cousin	maanshan	unknown	unknown	30/01/2020	1/2/2020	1/2/2020	2/2/2020	unknown	cousin
maanshan-26	37	female			29/01/2020	29/01/2020	maanshan-29	50	female			maanshan	29/01/2020	29/01/2020	no	The People_ Government of Maanshan Municipality	http://www.mas.gov.cn	Ali		maanshan	maanshan	unknown	unknown	30/01/2020	1/2/2020	1/2/2020	2/2/2020	unknown	relative	maanshan	unknown	unknown	1/2/2020	4/2/2020	4/2/2020	5/2/2020	unknown	relative
maanshan-1	43	male			22/01/2020	22/01/2020	maanshan-32	51	female			ningbo	29/01/2020	29/01/2020	no	The People_ Government of Maanshan Municipality	http://www.mas.gov.cn	Ali		maanshan	wuhan, Hubei Province	20/01/2020	unknown	22/01/2020	22/01/2020	25/01/2020	26/01/2020	unknown	close contact	maanshan	18/01/2020	unknown	30/01/2020	8/2/2020	10/2/2020	11/2/2020	unknown	close contact
maanshan-32	51	female			29/01/2020	29/01/2020	maanshan-35	50	male			maanshan	2/2/2020	2/2/2020	no	The People_ Government of Maanshan Municipality	http://www.mas.gov.cn	Ali		maanshan	ningbo	18/01/2020	unknown	30/01/2020	8/2/2020	10/2/2020	11/2/2020	unknown	close contact	maanshan	unknown	unknown	unknown	9/2/2020	14/02/2020	15/02/2020	unknown	close contact
tongling-14	49	male			24/01/2020	24/01/2020	tongling-21	50	female			tongling	4/2/2020	4/2/2020	no	The People_ Government of Tongling Municipality	http://www.tl.gov.cn	Ali		tongling	wuhan, Hubei Province	15/01/2020	unknown	27/01/2020	27/01/2020	30/01/2020	31/01/2020	mild	close contact	tongling	?	unknown	5/2/2020	5/2/2020	6/2/2020	7/2/2020	mild	close contact
tongling-24	27	female			30/01/2020	30/01/2020	tongling-23	23	male			shanghai	1/2/2020	1/2/2020	no	The People_ Government of Tongling Municipality	http://www.tl.gov.cn	Ali		tongling	shanghai	23/01/2020	unknown	6/2/2020	6/2/2020	8/2/2020	9/2/2020	mild	sister	tongling	23/01/2020	unknown	5/2/2020	5/2/2020	7/2/2020	8/2/2020	mild	brother
jining-7	48	male			25/01/2020	25/01/2020	jining-8	44	female			jining	28/01/2020	28/01/2020	no	Jining Municipal Health Commussion	http://wjw.jining.gov.cn/	Ali		jining	beijing	17/01/2020	unknown	28/01/2020	28/01/2020	29/01/2020	30/01/2020	unknown	close contact	jining	unknown	unknown	29/01/2020	29/01/2020	unknown	1/2/2020	unknown	close contact
jining-7	48	male			25/01/2020	25/01/2020	jining-9	38	female			jining	29/01/2020	29/01/2020	no	Jining Municipal Health Commussion	http://wjw.jining.gov.cn/	Ali		jining	beijing	17/01/2020	unknown	28/01/2020	28/01/2020	29/01/2020	30/01/2020	unknown	close contact	jining	unknown	unknown	29/01/2020	29/01/2020	unknown	1/2/2020	unknown	close contact
liaocheng-5	40	male			27/01/2020	27/01/2020	liaocheng-21	49	female			liaocheng	31/01/2020	31/01/2020	no	Liaocheng Municipal Health Commussion	http://wjw.liaocheng.gov.cn/	Ali		liaocheng	liaocheng	unknown	unknown	28/01/2020	28/01/2020	30/01/2020	31/01/2020	unknown	workmate	liaocheng	unknown	unknown	5/2/2020	5/2/2020	6/2/2020	8/2/2020	mild	workmate
liaocheng-5	40	male			27/01/2020	27/01/2020	liaocheng-32	62	female			liaocheng	30/01/2020	30/01/2020	no	Liaocheng Municipal Health Commussion	http://wjw.liaocheng.gov.cn/	Ali		liaocheng	liaocheng	unknown	unknown	28/01/2020	28/01/2020	30/01/2020	31/01/2020	unknown	close contact	liaocheng	unknown	unknown	6/2/2020	6/2/2020	unknown	9/2/2020	mild	close contact
linyi-9	41	male			19/01/2020	19/01/2020	linyi-10	38	female			linyi	25/01/2020	25/01/2020	no	Linyi Municipal Health Commussion	http://wsjsw.linyi.gov.cn/	Ali		linyi	wuhan, Hubei Province	19/01/2020	unknown	23/01/2020	23/01/2020	unknown	29/01/2020	mild	close contact	linyi	unknown	unknown	unknown	unknown	26/01/2020	29/01/2020	mild	close contact
rizhao-3	57	male			23/01/2020	23/01/2020	rizhao-10	64	male			rizhao	29/01/2020	29/01/2020	no	Rizhao Municipal Health Commussion	http://wsjkw.rizhao.gov.cn/	Ali		rizhao	wuhan, Hubei Province	17/01/2020	unknown	24/01/2020	24/01/2020	unknown	25/01/2020	mild	close contact	rizhao	unknown	unknown	29/01/2020	29/01/2020	unknown	1/2/2020	mild	close contact
taian-4	88	female			24/01/2020	24/01/2020	taian-7	67	male			taian	23/01/2020	23/01/2020	no	Taian Municipal Health Commussion	http://wjw.taian.gov.cn/	Ali		taian	taian	unknown	unknown	1/2/2020	1/2/2020	1/2/2020	3/2/2020	unknown	close contact	taian	unknown	unknown	23/01/2020	3/2/2020	4/2/2020	5/2/2020	unknown	close contact
weifang-11	45	male			21/01/2020	21/01/2020	weifang-18	62	female			weifang	2/2/2020	2/2/2020	no	Weifang Municipal Health Commussion	http://wsjkw.weifang.gov.cn/	Ali		weifang	unknown	unknown	unknown	21/01/2020	21/01/2020	2/2/2020	3/2/2020	mild	close contact	weifang	unknown	unknown	2/2/2020	2/2/2020	5/2/2020	6/2/2020	mild	close contact
weifang-11	45	male			21/01/2020	21/01/2020	weifang-19	48	male			weifang	25/01/2020	25/01/2020	no	Weifang Municipal Health Commussion	http://wsjkw.weifang.gov.cn/	Ali		weifang	unknown	unknown	unknown	21/01/2020	21/01/2020	2/2/2020	3/2/2020	mild	close contact	weifang	unknown	unknown	4/2/2020	4/2/2020	5/2/2020	6/2/2020	mild	close contact
weifang-26	58	male			1/2/2020	1/2/2020	weifang-38	48	female			weifang	8/2/2020	8/2/2020	no	Weifang Municipal Health Commussion	http://wsjkw.weifang.gov.cn/	Ali		weifang	weifang	unknown	unknown	1/2/2020	1/2/2020	6/2/2020	7/2/2020	mild	close contact	weifang	unknown	unknown	8/2/2020	8/2/2020	10/2/2020	11/2/2020	mild	close contact
weihai-13	51	male			23/01/2020	23/01/2020	weihai-15	53	male			weihai	24/01/2020	24/01/2020	no	Weihai Municipal Health Commussion	http://wsjkw.weihai.gov.cn/	Ali		weihai	weihai	unknown	unknown	unknown	30/01/2020	30/01/2020	31/01/2020	unknown	relative	weihai	unknown	unknown	unknown	30/01/2020	30/01/2020	31/01/2020	unknown	relative
zaozhuang-3	34	male			22/01/2020	22/01/2020	zaozhuang-21	50	female			zaozhuang	26/01/2020	26/01/2020	no	Zaozhuang Municipal Health Commussion	http://wsjkw.zaozhuang.gov.cn/	Ali		zaozhuang	wuhan, Hubei Province	20/01/2020	unknown	24/01/2020	27/01/2020	28/01/2020	28/01/2020	mild	close contact	zaozhuang	unknown	unknown	30/01/2020	30/01/2020	unknown	31/01/2020	unknown	close contact
dongguan-35	40	female			2/2/2020	2/2/2020	dongguan-31	63	female			dongguan	29/01/2020	29/01/2020	no	Dongguan Municipal Health Bureau	http://dghb.dg.gov.cn/	Ali		dongguan	nanyang	21/01/2020	unknown	unknown	29/01/2020	unknown	4/2/2020	unknown	relative	dongguan	unknown	unknown	unknown	29/01/2020	unknown	3/2/2020	unknown	relative
dongguan-39	55	female			19/01/2020	19/01/2020	dongguan-43	70	female			wuhan, Hubei Province	3/2/2020	3/2/2020	no	Dongguan Municipal Health Bureau	http://dghb.dg.gov.cn/	Ali		dongguan	dongguan	unknown	unknown	27/01/2020	27/01/2020	unknown	5/2/2020	unknown	relative	dongguan	21/01/2020	unknown	unknown	unknown	unknown	6/2/2020	unknown	relative
maoming-4	53	male			30/01/2020	30/01/2020	maoming-5	53	male			maoming	2/2/2020	2/2/2020	no	Maoming Municipal Health Commussion	http://wsjsj.maoming.gov.cn	Ali		maoming	suizhou, Hubei Province	23/01/2020	unknown	1/2/2020	1/2/2020	2/2/2020	3/2/2020	mild	relative by marriage	maoming	18/01/2020	2/2/2020	2/2/2020	2/2/2020	3/2/2020	4/2/2020	mild	relative by marriage
qingyuan-8	54	female			3/2/2020	3/2/2020	qingyuan-10	52	male			qingyuan	4/2/2020	4/2/2020	no	Qingyuan Municipal Health Commussion	http://www.gdqy.gov.cn/channel/qyswsjkj/	Ali		qingyuan	Hubei Province	25/01/2020	unknown	unknown	3/2/2020	3/2/2020	4/2/2020	mild	relative	qingyuan	local	unknown	4/2/2020	4/2/2020	4/2/2020	5/2/2020	mild	relative
shaoguan-1	58	female			16/01/2020	16/01/2020	shaoguan-2	62	female			shaoguan	19/01/2020	19/01/2020	no	Shaoguan Municipal Health Commussion	http://wsjk.sg.gov.cn	Ali		shaoguan	ezhou, Hubei Province	15/01/2020	unknown	20/01/2020	20/01/2020	21/01/2020	unknown	mild	sister	shaoguan	local	unknown	20/01/2020	20/01/2020	21/01/2020	unknown	mild	sister
shenzhen-76	30	female			22/01/2020	22/01/2020	shenzhen-108	38	female			wuhan, Hubei Province	28/01/2020	28/01/2020	no	Shenzhen Municipal Health Commussion	http://wjw.sz.gov.cn/	Ali		shenzhen	wuhan, Hubei Province	21/01/2020	unknown	24/01/2020	unknown	unknown	29/01/2020	mild	sister	shenzhen	local	unknown	29/01/2020	unknown	unknown	1/2/2020	mild	sister
shenzhen-12	69	male			12/1/2020	12/1/2020	shenzhen-188	25	female			shenzhen	25/01/2020	25/01/2020	no	Shenzhen Municipal Health Commussion	http://wjw.sz.gov.cn/	Ali		shenzhen	wuhan, Hubei Province	15/01/2020	unknown	19/01/2020	unknown	unknown	24/01/2020	mild	close contact	shenzhen	local	unknown	26/01/2020	unknown	unknown	2/2/2020	mild	close contact
shenzhen-133	51	male			24/01/2020	24/01/2020	shenzhen-216	48	male			shenzhen	25/01/2020	25/01/2020	no	Shenzhen Municipal Health Commussion	http://wjw.sz.gov.cn/	Ali		shenzhen	shenzhen	local	unknown	28/01/2020	unknown	unknown	1/2/2020	severe	workmate	shenzhen	local	unknown	31/01/2020	unknown	unknown	3/2/2020	mild	workmate
shenzhen-133	51	male			24/01/2020	24/01/2020	shenzhen-255	34	male			shenzhen	26/01/2020	26/01/2020	no	Shenzhen Municipal Health Commussion	http://wjw.sz.gov.cn/	Ali		shenzhen	shenzhen	local	unknown	28/01/2020	unknown	unknown	1/2/2020	severe	workmate	shenzhen	local	unknown	31/01/2020	unknown	unknown	4/2/2020	mild	workmate
shenzhen-255	34	male			26/01/2020	26/01/2020	shenzhen-267	50	female			shenzhen	30/01/2020	30/01/2020	no	Shenzhen Municipal Health Commussion	http://wjw.sz.gov.cn/	Ali		shenzhen	shenzhen	local	unknown	31/01/2020	unknown	unknown	4/2/2020	mild	nephew	shenzhen	local	unknown	1/2/2020	unknown	unknown	4/2/2020	mild	aunt
shenzhen-344	63	male			3/2/2020	3/2/2020	shenzhen-299	23	female			ganzhou	4/2/2020	4/2/2020	no	Shenzhen Municipal Health Commussion	http://wjw.sz.gov.cn/	Ali		shenzhen	shenzhen	local	unknown	3/2/2020	unknown	unknown	8/2/2020	mild	friend	shenzhen	28/01/2020	unknown	4/2/2020	unknown	unknown	6/2/2020	mild	friend
shenzhen-270	50	female			26/01/2020	26/01/2020	shenzhen-354	37	female			shenzhen	5/2/2020	5/2/2020	no	Shenzhen Municipal Health Commussion	http://wjw.sz.gov.cn/	Ali		shenzhen	shenzhen	local	unknown	3/2/2020	unknown	unknown	4/2/2020	mild	sister	shenzhen	local	unknown	7/2/2020	unknown	unknown	8/2/2020	mild	sister
shenzhen-235	58	female			29/01/2020	29/01/2020	shenzhen-392	25	male			shenzhen	11/2/2020	11/2/2020	no	Shenzhen Municipal Health Commussion	http://wjw.sz.gov.cn/	Ali		shenzhen	wuhan, Hubei Province	20/01/2020	unknown	30/01/2020	unknown	unknown	3/2/2020	mild	aunt	shenzhen	local	unknown	11/2/2020	unknown	unknown	14/02/2020	mild	nephew
shenzhen-235	58	female			29/01/2020	29/01/2020	shenzhen-395	58	female			shenzhen	7/2/2020	7/2/2020	no	Shenzhen Municipal Health Commussion	http://wjw.sz.gov.cn/	Ali		shenzhen	wuhan, Hubei Province	20/01/2020	unknown	30/01/2020	unknown	unknown	3/2/2020	mild	sister	shenzhen	local	unknown	11/2/2020	unknown	unknown	14/02/2020	mild	sister
shenzhen-133	51	male			24/01/2020	24/01/2020	shenzhen-398	56	male			shenzhen	1/2/2020	1/2/2020	no	Shenzhen Municipal Health Commussion	http://wjw.sz.gov.cn/	Ali		shenzhen	shenzhen	local	unknown	28/01/2020	unknown	unknown	1/2/2020	severe	brother	shenzhen	local	unknown	1/2/2020	unknown	unknown	14/02/2020	mild	brother
zhongshan-39	36	male			17/01/2020	17/01/2020	zhongshan-43	45	female			zhongshan	7/2/2020	7/2/2020	no	Zhongshan Municipal Health Commussion	http://wjj.zs.gov.cn	Ali		zhongshan	wuhan, Hubei Province	21/01/2020	unknown	23/01/2020	23/01/2020	unknown	unknown	mild	relative	zhongshan	local	24/01/2020	unknown	7/2/2020	unknown	10/2/2020	unknown	relative
zhongshan-45	68	male			28/01/2020	28/01/2020	zhongshan-48	52	male			zhongshan	4/2/2020	4/2/2020	no	Zhongshan Municipal Health Commussion	http://wjj.zs.gov.cn	Ali		zhongshan	wuhan, Hubei Province	12/1/2020	unknown	7/2/2020	7/2/2020	9/2/2020	10/2/2020	unknown	relative	zhongshan	local	unknown	unknown	unknown	unknown	11/2/2020	unknown	relative
fangchenggang-4	44	female			22/01/2020	22/01/2020	fangchenggang-9	47	male			unknown	26/01/2020	26/01/2020	no	Fangchenggang Municipal Health Commussion	http://www.fcgs.gov.cn/wjw/zwgk/	Ali		fangchenggang	unknown	unknown	unknown	27/01/2020	27/01/2020	28/01/2020	29/01/2020	mild	close contact	fangchenggang	unknown	unknown	27/01/2020	31/01/2020	2/2/2020	3/2/2020	mild	close contact
guigang-2	40	male			1/2/2020	1/2/2020	guigang-3	29	male			wuhan, Hubei Province	1/2/2020	1/2/2020	no	Guigang Municipal People's Government	http://www.gxgg.gov.cn	Ali		guigang	wuhan, Hubei Province	18/01/2020	unknown	1/2/2020	1/2/2020	unknown	unknown	mild	relative	guigang	18/01/2020	unknown	1/2/2020	1/2/2020	unknown	unknown	mild	relative
guigang-2	40	male			1/2/2020	1/2/2020	guigang-8	30	male			guigang	7/2/2020	7/2/2020	no	Guigang Municipal People's Government	http://www.gxgg.gov.cn	Ali		guigang	wuhan, Hubei Province	18/01/2020	unknown	1/2/2020	1/2/2020	unknown	unknown	mild	sister's husban	guigang	15/01/2020	unknown	7/2/2020	8/2/2020	8/2/2020	8/2/2020	mild	brother-in-law
liuzhou-8	27	female			22/01/2020	22/01/2020	liuzhou-9	41	male			wuhan, Hubei Province	25/01/2020	25/01/2020	no	Liuzhou Municipal Health Commussion	http://wjw.liuzhou.gov.cn/	Ali		liuzhou	wuhan, Hubei Province	22/01/2020	unknown	23/01/2020	23/01/2020	29/01/2020	30/01/2020	mild	relative	liuzhou	22/01/2020	unknown	25/01/2020	25/01/2020	29/01/2020	30/01/2020	mild	relative
liuzhou-9	41	male			25/01/2020	25/01/2020	liuzhou-10	6	male			wuhan, Hubei Province	26/01/2020	26/01/2020	no	Liuzhou Municipal Health Commussion	http://wjw.liuzhou.gov.cn/	Ali		liuzhou	wuhan, Hubei Province	22/01/2020	unknown	25/01/2020	25/01/2020	29/01/2020	30/01/2020	mild	relative	liuzhou	22/01/2020	unknown	26/01/2020	26/01/2020	29/01/2020	30/01/2020	mild	relative
liuzhou-10	6	male			26/01/2020	26/01/2020	liuzhou-17	20	male			wuhan, Hubei Province	31/01/2020	31/01/2020	no	Liuzhou Municipal Health Commussion	http://wjw.liuzhou.gov.cn/	Ali		liuzhou	wuhan, Hubei Province	22/01/2020	unknown	26/01/2020	26/01/2020	29/01/2020	30/01/2020	mild	relative	liuzhou	22/01/2020	unknown	1/2/2020	1/2/2020	4/2/2020	5/2/2020	mild	relative
liuzhou-17	20	male			31/01/2020	31/01/2020	liuzhou-18	2	male			wuhan, Hubei Province	31/01/2020	31/01/2020	no	Liuzhou Municipal Health Commussion	http://wjw.liuzhou.gov.cn/	Ali		liuzhou	wuhan, Hubei Province	22/01/2020	unknown	1/2/2020	1/2/2020	4/2/2020	5/2/2020	mild	relative	liuzhou	22/01/2020	unknown	2/2/2020	1/2/2020	4/2/2020	5/2/2020	mild	relative
liuzhou-11	65	male			28/01/2020	28/01/2020	liuzhou-13	51	female			liuzhou	30/01/2020	30/01/2020	no	Liuzhou Municipal Health Commussion	http://wjw.liuzhou.gov.cn/	Ali		liuzhou	liuzhou	unknown	unknown	28/01/2020	28/01/2020	29/01/2020	30/01/2020	mild	relative	liuzhou	unknown	unknown	30/01/2020	30/01/2020	31/01/2020	1/2/2020	mild	relative
liuzhou-10	6	male			26/01/2020	26/01/2020	liuzhou-11	65	male			liuzhou	28/01/2020	28/01/2020	no	Liuzhou Municipal Health Commussion	http://wjw.liuzhou.gov.cn/	Ali		liuzhou	wuhan, Hubei Province	22/01/2020	unknown	26/01/2020	26/01/2020	29/01/2020	30/01/2020	mild	relative	liuzhou	unknown	unknown	28/01/2020	28/01/2020	29/01/2020	30/01/2020	mild	relative
nanning-7	49	male			31/01/2020	31/01/2020	nanning-23	26	female			nanning	2/2/2020	2/2/2020	no	Nanning Municipal Health Commussion	http://wjw.nanning.gov.cn/	Ali		nanning	unknown	24/01/2020	unknown	31/01/2020	2/2/2020	2/2/2020	2/2/2020	mild	relative	nanning	unknown	unknown	8/2/2020	8/2/2020	9/2/2020	9/2/2020	mild	relative
nanning-40	30	male			15/01/2020	15/01/2020	nanning-26	46	female			nanning	8/2/2020	8/2/2020	no	Nanning Municipal Health Commussion	http://wjw.nanning.gov.cn/	Ali		nanning	nanning	unknown	unknown	15/02/2020	15/02/2020	15/02/2020	16/02/2020	unknown	close contact	nanning	unknown	unknown	8/2/2020	9/2/2020	unknown	10/2/2020	mild	close contact
wuzhou-5	20	male			23/01/2020	23/01/2020	wuzhou-2	27	male			unknown	26/01/2020	26/01/2020	no	Wuzhou Municipal Health Commussion	http://wjw.wuzhou.gov.cn/gggs/index.shtml	Ali		wuzhou	wuhan, Hubei Province	18/01/2020	unknown	23/01/2020	25/01/2020	25/01/2020	25/01/2020	mild	close contact	wuzhou	unknown	unknown	26/01/2020	26/01/2020	27/01/2020	28/01/2020	mild	close contact
huaian-2	49	male			19/01/2020	19/01/2020	huaian-15	31	male			huaian	30/01/2020	30/01/2020	no	The People_ Government of Huaian Municipality	http://www.huaian.gov.cn	Ali		huaian	wuhan, Hubei Province	15/01/2020	unknown	25/01/2020	25/01/2020	unknown	27/01/2020	unknown	close contact	huaian	unknown	unknown	30/01/2020	30/01/2020	unknown	3/2/2020	unknown	close contact
huaian-2	49	male			19/01/2020	19/01/2020	huaian-16	50	male			huaian	26/01/2020	26/01/2020	no	The People_ Government of Huaian Municipality	http://www.huaian.gov.cn	Ali		huaian	wuhan, Hubei Province	15/01/2020	unknown	25/01/2020	25/01/2020	unknown	27/01/2020	unknown	close contact	huaian	unknown	unknown	26/01/2020	26/01/2020	unknown	3/2/2020	unknown	close contact
huaian-2	49	male			19/01/2020	19/01/2020	huaian-9	50	male			huaian	28/01/2020	28/01/2020	no	The People_ Government of Huaian Municipality	http://www.huaian.gov.cn	Ali		huaian	wuhan, Hubei Province	15/01/2020	unknown	25/01/2020	25/01/2020	unknown	27/01/2020	unknown	close contact	huaian	unknown	unknown	28/01/2020	28/01/2020	unknown	31/01/2020	unknown	close contact
js_taizhou-20	53	male			30/01/2020	30/01/2020	js_taizhou-25	65	male			taizhou	31/01/2020	31/01/2020	no	Taian Municipal Health Commussion	http://wjw.taian.gov.cn/	Ali		taizhou	shiyan, Hubei Province	19/01/2020	unknown	30/01/2020	30/01/2020	unknown	3/2/2020	mild	close contact	taizhou	unknown	unknown	31/01/2020	31/01/2020	unknown	5/2/2020	mild	close contact
js_taizhou-20	53	male			30/01/2020	30/01/2020	js_taizhou-26	41	male			taizhou	30/01/2020	30/01/2020	no	Taian Municipal Health Commussion	http://wjw.taian.gov.cn/	Ali		taizhou	shiyan, Hubei Province	19/01/2020	unknown	30/01/2020	30/01/2020	unknown	3/2/2020	mild	close contact	taizhou	unknown	unknown	30/01/2020	4/2/2020	unknown	6/2/2020	mild	close contact
js_taizhou-20	53	male			30/01/2020	30/01/2020	js_taizhou-27	64	female			taizhou	31/01/2020	31/01/2020	no	Taian Municipal Health Commussion	http://wjw.taian.gov.cn/	Ali		taizhou	shiyan, Hubei Province	19/01/2020	unknown	30/01/2020	30/01/2020	unknown	3/2/2020	mild	close contact	taizhou	unknown	unknown	31/01/2020	3/2/2020	unknown	6/2/2020	mild	close contact
lianyungang-17	52	male			2/2/2020	2/2/2020	lianyungang-18	76	male			lianyungang	3/2/2020	3/2/2020	no	Lianyungang Municipal People's Government	http://www.lyg.gov.cn/zglygzfmhwz/xxzx/xxzxRd.htm	Ali		lianyungang	lianyungang	unknown	unknown	4/2/2020	4/2/2020	6/2/2020	7/2/2020	mild	close contact	lianyungang	unknown	unknown	3/2/2020	4/2/2020	6/2/2020	7/2/2020	mild	close contact
lianyungang-17	52	male			2/2/2020	2/2/2020	lianyungang-19	53	female			lianyungang	4/2/2020	4/2/2020	no	Lianyungang Municipal People's Government	http://www.lyg.gov.cn/zglygzfmhwz/xxzx/xxzxRd.htm	Ali		lianyungang	lianyungang	unknown	unknown	4/2/2020	4/2/2020	6/2/2020	7/2/2020	mild	close contact	lianyungang	unknown	unknown	5/2/2020	5/2/2020	7/2/2020	8/2/2020	mild	close contact
lianyungang-17	52	male			2/2/2020	2/2/2020	lianyungang-26	66	male			lianyungang	3/2/2020	3/2/2020	no	Lianyungang Municipal People's Government	http://www.lyg.gov.cn/zglygzfmhwz/xxzx/xxzxRd.htm	Ali		lianyungang	lianyungang	unknown	unknown	4/2/2020	4/2/2020	6/2/2020	7/2/2020	mild	close contact	lianyungang	unknown	unknown	5/2/2020	5/2/2020	8/2/2020	9/2/2020	mild	close contact
lianyungang-17	52	male			2/2/2020	2/2/2020	lianyungang-28	46	female			lianyungang	31/01/2020	31/01/2020	no	Lianyungang Municipal People's Government	http://www.lyg.gov.cn/zglygzfmhwz/xxzx/xxzxRd.htm	Ali		lianyungang	lianyungang	unknown	unknown	4/2/2020	4/2/2020	6/2/2020	7/2/2020	mild	close contact	lianyungang	unknown	unknown	6/2/2020	6/2/2020	9/2/2020	10/2/2020	mild	close contact
lianyungang-17	52	male			2/2/2020	2/2/2020	lianyungang-29	32	female			lianyungang	3/2/2020	3/2/2020	no	Lianyungang Municipal People's Government	http://www.lyg.gov.cn/zglygzfmhwz/xxzx/xxzxRd.htm	Ali		lianyungang	lianyungang	unknown	unknown	4/2/2020	4/2/2020	6/2/2020	7/2/2020	mild	close contact	lianyungang	unknown	unknown	6/2/2020	6/2/2020	9/2/2020	10/2/2020	mild	close contact
lianyungang-29	32	female			3/2/2020	3/2/2020	lianyungang-30	32	male			lianyungang	6/2/2020	6/2/2020	no	Lianyungang Municipal People's Government	http://www.lyg.gov.cn/zglygzfmhwz/xxzx/xxzxRd.htm	Ali		lianyungang	lianyungang	unknown	unknown	6/2/2020	6/2/2020	9/2/2020	10/2/2020	mild	close contact	lianyungang	unknown	unknown	6/2/2020	6/2/2020	9/2/2020	10/2/2020	mild	close contact
nanjing-26	58	female			27/01/2020	27/01/2020	nanjing-27	72	female			nanjing	1/2/2020	1/2/2020	no	Nanjing Municipal Health Commussion	http://wjw.nanjing.gov.cn/	Ali		nanjing	nanjing	unknown	unknown	29/01/2020	29/01/2020	2/2/2020	3/2/2020	mild	relative	nanjing	unknown	unknown	1/2/2020	2/2/2020	2/2/2020	3/2/2020	mild	relative
nanjing-26	58	female			27/01/2020	27/01/2020	nanjing-28	68	male			nanjing	31/01/2020	31/01/2020	no	Nanjing Municipal Health Commussion	http://wjw.nanjing.gov.cn/	Ali		nanjing	nanjing	unknown	unknown	29/01/2020	29/01/2020	2/2/2020	3/2/2020	mild	relative	nanjing	unknown	unknown	1/2/2020	1/2/2020	2/2/2020	3/2/2020	mild	relative
wuxi-15	36	male			22/01/2020	22/01/2020	wuxi-16	26	male			wuxi	29/01/2020	29/01/2020	no	Wuxi Municipal Health Commussion	http://wjw.wuxi.gov.cn/	Ali		wuxi	wuxi	unknown	unknown	unknown	unknown	unknown	2/2/2020	unknown	workmate	wuxi	unknown	unknown	29/01/2020	29/01/2020	unknown	2/2/2020	unknown	workmate
xuzhou-1	unknown	male			19/01/2020	19/01/2020	xuzhou-4	unknown	female			xuzhou	24/01/2020	24/01/2020	no	Xuzhou Municipal Health Commussion	http://ws.xz.gov.cn/	Ali		xuzhou	wuhan, Hubei Province	3/1/2020	unknown	19/01/2020	26/01/2020	26/01/2020	28/01/2020	mild	close contact	xuzhou	unknown	unknown	unknown	27/01/2020	27/01/2020	28/01/2020	mild	close contact
xuzhou-8	unknown	male			22/01/2020	22/01/2020	xuzhou-41	71	female			xuzhou	30/01/2020	30/01/2020	no	Xuzhou Municipal Health Commussion	http://ws.xz.gov.cn/	Ali		xuzhou	wuhan, Hubei Province	20/01/2020	unknown	24/01/2020	24/01/2020	27/01/2020	28/01/2020	mild	relative	xuzhou	unknown	unknown	30/01/2020	30/01/2020	unknown	5/2/2020	mild	relative
xuzhou-1	unknown	male			19/01/2020	19/01/2020	xuzhou-5	unknown	male			xuzhou	24/01/2020	24/01/2020	no	Xuzhou Municipal Health Commussion	http://ws.xz.gov.cn/	Ali		xuzhou	wuhan, Hubei Province	3/1/2020	unknown	19/01/2020	26/01/2020	26/01/2020	28/01/2020	mild	relative	xuzhou	unknown	unknown	unknown	27/01/2020	27/01/2020	28/01/2020	mild	relative
xuzhou-1	unknown	male			19/01/2020	19/01/2020	xuzhou-6	unknown	female			xuzhou	22/01/2020	22/01/2020	no	Xuzhou Municipal Health Commussion	http://ws.xz.gov.cn/	Ali		xuzhou	wuhan, Hubei Province	3/1/2020	unknown	19/01/2020	26/01/2020	26/01/2020	28/01/2020	mild	relative	xuzhou	7/1/2020	unknown	unknown	27/01/2020	27/01/2020	28/01/2020	mild	relative
yancheng-8	59	female			24/01/2020	24/01/2020	yancheng-11	33	female			wuhan, Hubei Province	4/2/2020	4/2/2020	no	The People_ Government of Yancheng Municipality	http://www.yancheng.gov.cn	Ali		yancheng	wuhan, Hubei Province	21/01/2020	unknown	28/01/2020	28/01/2020	unknown	1/2/2020	unknown	relative	yancheng	21/01/2020	unknown	4/2/2020	4/2/2020	unknown	6/2/2020	unknown	relative
yangzhou-2	53	male			23/01/2020	23/01/2020	yangzhou-11	69	female			yangzhou	1/2/2020	1/2/2020	no	Yangzhou Municipal Health Commussion	http://wjw.yangzhou.gov.cn/	Ali		yangzhou	wuhan, Hubei Province	21/01/2020	unknown	23/01/2020	23/01/2020	unknown	29/01/2020	unknown	close contact	yangzhou	unknown	unknown	1/2/2020	3/2/2020	unknown	7/2/2020	unknown	close contact
jx_fuzhou-25	49	male			29/01/2020	29/01/2020	jx_fuzhou-27	43	female			fuzhou	23/01/2020	23/01/2020	no	Fuzhou Municipal Health Commussion	http://www.fuzhou.gov.cn/zgfzzt/swjw/fzwj/wjgg/	Ali		fuzhou	wuhan, Hubei Province	20/01/2020	unknown	30/01/2020	30/01/2020	unknown	3/2/2020	mild	brother	fuzhou	local	unknown	29/01/2020	29/01/2020	unknown	3/2/2020	mild	sister-in-law
jx_fuzhou-41	45	male			26/01/2020	26/01/2020	jx_fuzhou-42	32	male			fuzhou	1/2/2020	1/2/2020	no	Fuzhou Municipal Health Commussion	http://www.fuzhou.gov.cn/zgfzzt/swjw/fzwj/wjgg/	Ali		fuzhou	fuzhou	local	unknown	1/2/2020	1/2/2020	unknown	5/2/2020	mild	uncle	fuzhou	local	unknown	3/2/2020	3/2/2020	unknown	5/2/2020	mild	nephew
jx_fuzhou-41	45	male			26/01/2020	26/01/2020	jx_fuzhou-43	32	female			fuzhou	1/2/2020	1/2/2020	no	Fuzhou Municipal Health Commussion	http://www.fuzhou.gov.cn/zgfzzt/swjw/fzwj/wjgg/	Ali		fuzhou	fuzhou	local	unknown	1/2/2020	1/2/2020	unknown	5/2/2020	mild	uncle	fuzhou	local	unknown	3/2/2020	3/2/2020	unknown	5/2/2020	mild	nephew's wife
jx_fuzhou-64	40	male			3/2/2020	3/2/2020	jx_fuzhou-68	37	male			fuzhou	7/2/2020	7/2/2020	no	Fuzhou Municipal Health Commussion	http://www.fuzhou.gov.cn/zgfzzt/swjw/fzwj/wjgg/	Ali		fuzhou	fuzhou	local	unknown	8/2/2020	8/2/2020	unknown	11/2/2020	mild	brother	fuzhou	local	unknown	11/2/2020	9/2/2020	unknown	13/02/2020	mild	brother
jx_fuzhou-63	66	male			28/01/2020	28/01/2020	jx_fuzhou-69	52	male			fuzhou	9/2/2020	9/2/2020	no	Fuzhou Municipal Health Commussion	http://www.fuzhou.gov.cn/zgfzzt/swjw/fzwj/wjgg/	Ali		fuzhou	fuzhou	local	unknown	7/2/2020	7/2/2020	unknown	10/2/2020	mild	close contact	fuzhou	local	unknown	10/2/2020	10/2/2020	unknown	14/02/2020	mild	close contact
cangzhou-1	80	male			9/1/2020	9/1/2020	cangzhou-11	61	male			cangzhou	23/01/2020	23/01/2020	no	The People_ Government of Cangzhou Municipality	http://www.cangzhou.gov.cn	Ali		cangzhou	wuhan, Hubei Province	unknown	unknown	13/01/2020	16/01/2020	22/01/2020	22/01/2020	death	close contact	cangzhou	local	unknown	23/01/2020	23/01/2020	28/01/2020	28/01/2020	unknown	close contact
cangzhou-1	80	male			9/1/2020	9/1/2020	cangzhou-12	62	male			cangzhou	25/01/2020	25/01/2020	no	The People_ Government of Cangzhou Municipality	http://www.cangzhou.gov.cn	Ali		cangzhou	wuhan, Hubei Province	unknown	unknown	13/01/2020	16/01/2020	22/01/2020	22/01/2020	death	close contact	cangzhou	local	24/01/2020	24/01/2020	26/01/2020	29/01/2020	29/01/2020	unknown	close contact
cangzhou-1	80	male			9/1/2020	9/1/2020	cangzhou-15	72	female			cangzhou	24/01/2020	24/01/2020	no	The People_ Government of Cangzhou Municipality	http://www.cangzhou.gov.cn	Ali		cangzhou	wuhan, Hubei Province	unknown	unknown	13/01/2020	16/01/2020	22/01/2020	22/01/2020	death	close contact	cangzhou	local	unknown	24/01/2020	28/01/2020	30/01/2020	30/01/2020	unknown	close contact
cangzhou-7	38	male			25/01/2020	25/01/2020	cangzhou-16	49	female			cangzhou	27/01/2020	27/01/2020	no	The People_ Government of Cangzhou Municipality	http://www.cangzhou.gov.cn	Ali		cangzhou	wuhan, Hubei Province	17/01/2020	unknown	26/01/2020	28/01/2020	28/01/2020	28/01/2020	unknown	close contact	cangzhou	local	27/01/2020	27/01/2020	30/01/2020	30/01/2020	30/01/2020	unknown	close contact
cangzhou-1	80	male			9/1/2020	9/1/2020	cangzhou-2	59	male			cangzhou	22/01/2020	22/01/2020	no	The People_ Government of Cangzhou Municipality	http://www.cangzhou.gov.cn	Ali		cangzhou	wuhan, Hubei Province	unknown	unknown	13/01/2020	16/01/2020	22/01/2020	22/01/2020	death	close contact	cangzhou	local	unknown	22/01/2020	24/01/2020	24/01/2020	24/01/2020	unknown	close contact
cangzhou-3	31	male			24/01/2020	24/01/2020	cangzhou-20	30	male			cangzhou	27/01/2020	27/01/2020	no	The People_ Government of Cangzhou Municipality	http://www.cangzhou.gov.cn	Ali		cangzhou	wuhan, Hubei Province	19/01/2020	unknown	25/01/2020	27/01/2020	27/01/2020	27/01/2020	unknown	close contact	cangzhou	local	unknown	27/01/2020	27/01/2020	3/2/2020	3/2/2020	unknown	close contact
cangzhou-1	80	male			9/1/2020	9/1/2020	cangzhou-23	51	female			cangzhou	19/01/2020	19/01/2020	no	The People_ Government of Cangzhou Municipality	http://www.cangzhou.gov.cn	Ali		cangzhou	wuhan, Hubei Province	unknown	unknown	13/01/2020	16/01/2020	22/01/2020	22/01/2020	death	close contact	cangzhou	local	unknown	22/01/2020	22/01/2020	6/2/2020	6/2/2020	unknown	close contact
cangzhou-1	80	male			9/1/2020	9/1/2020	cangzhou-24	62	female			cangzhou	25/01/2020	25/01/2020	no	The People_ Government of Cangzhou Municipality	http://www.cangzhou.gov.cn	Ali		cangzhou	wuhan, Hubei Province	unknown	unknown	13/01/2020	16/01/2020	22/01/2020	22/01/2020	death	close contact	cangzhou	local	22/01/2020	22/01/2020	6/2/2020	6/2/2020	6/2/2020	unknown	close contact
chengde-3	unknown	female			2/2/2020	2/2/2020	chengde-4	unknown	male			chengde	3/2/2020	3/2/2020	no	Chengde Municipal Health Commussion	http://wjw.chengde.gov.cn/	Ali		chengde	xiaogan, Hubei Province	22/01/2020	unknown	2/2/2020	3/2/2020	3/2/2020	3/2/2020	unknown	relative	chengde	local	unknown	3/2/2020	4/2/2020	4/2/2020	4/2/2020	unknown	relative
langfang-3	21	male			23/01/2020	23/01/2020	langfang-13	35	male			langfang	2/2/2020	2/2/2020	no	Langfang Municipal Health Commussion	http://wjw.lf.gov.cn/html/index.html	Ali		langfang	wuhan, Hubei Province	21/01/2020	unknown	23/01/2020	27/01/2020	27/01/2020	27/01/2020	unknown	close contact	langfang	local	2/2/2020	2/2/2020	2/2/2020	4/2/2020	4/2/2020	unknown	close contact
langfang-3	21	male			23/01/2020	23/01/2020	langfang-16	35	male			langfang	7/2/2020	7/2/2020	no	Langfang Municipal Health Commussion	http://wjw.lf.gov.cn/html/index.html	Ali		langfang	wuhan, Hubei Province	21/01/2020	unknown	23/01/2020	27/01/2020	27/01/2020	27/01/2020	unknown	close contact	langfang	local	27/01/2020	7/2/2020	7/2/2020	7/2/2020	7/2/2020	unknown	close contact
tangshan-15	28	female			28/01/2020	28/01/2020	tangshan-21	67	male			tangshan	28/01/2020	28/01/2020	no	Tangshan Municipal Health Commussion	http://wsjkwyh.tangshan.gov.cn/	Ali		tangshan	tangshan	local	unknown	28/01/2020	5/2/2020	5/2/2020	5/2/2020	unknown	close contact	tangshan	local	2/2/2020	4/2/2020	7/2/2020	7/2/2020	7/2/2020	unknown	close contact
tangshan-21	67	male			28/01/2020	28/01/2020	tangshan-30	45	male			tangshan	9/2/2020	9/2/2020	no	Tangshan Municipal Health Commussion	http://wsjkwyh.tangshan.gov.cn/	Ali		tangshan	tangshan	local	2/2/2020	4/2/2020	7/2/2020	7/2/2020	7/2/2020	unknown	relative	tangshan	local	6/2/2020	9/2/2020	10/2/2020	10/2/2020	10/2/2020	unknown	relative
tangshan-21	67	male			28/01/2020	28/01/2020	tangshan-34	70	female			tangshan	9/2/2020	9/2/2020	no	Tangshan Municipal Health Commussion	http://wsjkwyh.tangshan.gov.cn/	Ali		tangshan	tangshan	local	2/2/2020	4/2/2020	7/2/2020	7/2/2020	7/2/2020	unknown	close contact	tangshan	local	3/2/2020	9/2/2020	9/2/2020	12/2/2020	12/2/2020	unknown	close contact
tangshan-21	67	male			28/01/2020	28/01/2020	tangshan-46	19	male			tangshan	10/2/2020	10/2/2020	no	Tangshan Municipal Health Commussion	http://wsjkwyh.tangshan.gov.cn/	Ali		tangshan	tangshan	local	2/2/2020	4/2/2020	7/2/2020	7/2/2020	7/2/2020	unknown	relative	tangshan	local	5/2/2020	10/2/2020	14/02/2020	14/02/2020	14/02/2020	unknown	relative
tangshan-15	28	female			28/01/2020	28/01/2020	tangshan-29	64	male			unknown	6/2/2020	6/2/2020	no	Tangshan Municipal Health Commussion	http://wsjkwyh.tangshan.gov.cn/	Ali		tangshan	tangshan	local	unknown	28/01/2020	5/2/2020	5/2/2020	5/2/2020	unknown	close contact	tangshan	26/01/2020	unknown	8/2/2020	8/2/2020	10/2/2020	10/2/2020	unknown	close contact
anyang-1	45	male			23/01/2020	23/01/2020	anyang-3	48	female			anyang	25/01/2020	25/01/2020	no	Anyang Municipal Health Commussion	http://aywjw.anyang.gov.cn	Ali		anyang	anyang	unknown	23/01/2020	23/01/2020	26/01/2020	26/01/2020	27/01/2020	unknown	brother	anyang	unknown	25/01/2020	25/01/2020	26/01/2020	26/01/2020	27/01/2020	unknown	sister
anyang-1	45	male			23/01/2020	23/01/2020	anyang-39	57	female			anyang	25/01/2020	25/01/2020	no	Anyang Municipal Health Commussion	http://aywjw.anyang.gov.cn	Ali		anyang	anyang	unknown	23/01/2020	23/01/2020	26/01/2020	26/01/2020	27/01/2020	unknown	uncle	anyang	unknown	unknown	26/01/2020	26/01/2020	27/01/2020	28/01/2020	unknown	niece
hebi-9	53	male			8/2/2020	8/2/2020	hebi-11	32	male			hebi	28/01/2020	28/01/2020	no	Hebi Municipal Health Commussion	https://wsjkw.hebi.gov.cn/	Ali		hebi	wuhan, Hubei Province	16/01/2020	unknown	8/2/2020	8/2/2020	8/2/2020	9/2/2020	unknown	relative	hebi	unknown	unknown	6/2/2020	8/2/2020	8/2/2020	9/2/2020	unknown	relative
jiaozuo-11	83	female			31/01/2020	31/01/2020	jiaozuo-17	31	male			jiaozuo	31/01/2020	31/01/2020	no	Jiaozuo Municipal Health Commussion	http://www.jzswjw.gov.cn/	Ali		jiaozuo	jiaozuo	unknown	unknown	31/01/2020	3/2/2020	3/2/2020	4/2/2020	death	relative	jiaozuo	unknown	unknown	31/01/2020	5/2/2020	5/2/2020	6/2/2020	mild	relative
jiaozuo-19	52	male			1/2/2020	1/2/2020	jiaozuo-20	51	female			unknown	1/2/2020	1/2/2020	no	Jiaozuo Municipal Health Commussion	http://www.jzswjw.gov.cn/	Ali		jiaozuo	unknown	26/01/2020	26/01/2020	5/2/2020	7/2/2020	7/2/2020	8/2/2020	mild	relative	jiaozuo	26/01/2020	unknown	5/2/2020	7/2/2020	7/2/2020	8/2/2020	mild	relative
kaifeng-12	33	male			1/2/2020	1/2/2020	kaifeng-18	43	female			wuhan, Hubei Province	3/2/2020	3/2/2020	no	Kaifeng Municipal Health Commussion	http://www.kfwsjsw.gov.cn/	Ali		kaifeng	shenzhen	20/01/2020	2/2/2020	1/2/2020	3/2/2020	3/2/2020	5/2/2020	unknown	relative	kaifeng	3/1/2020	unknown	3/2/2020	5/2/2020	5/2/2020	6/2/2020	unknown	relative
kaifeng-12	33	male			1/2/2020	1/2/2020	kaifeng-20	42	male			shenzhen	4/2/2020	4/2/2020	no	Kaifeng Municipal Health Commussion	http://www.kfwsjsw.gov.cn/	Ali		kaifeng	shenzhen	20/01/2020	2/2/2020	1/2/2020	3/2/2020	3/2/2020	5/2/2020	unknown	relative	kaifeng	3/1/2020	unknown	4/2/2020	8/2/2020	8/2/2020	9/2/2020	unknown	relative
luohe-29	41	male			26/01/2020	26/01/2020	luohe-30	47	male			tahe	10/2/2020	10/2/2020	no	The People_ Government of Luohe Municipality	http://www.luohe.gov.cn	Ali		tahe	tahe	unknown	unknown	5/2/2020	10/2/2020	10/2/2020	11/2/2020	unknown	close contact	tahe	unknown	unknown	10/2/2020	11/2/2020	11/2/2020	12/2/2020	unknown	close contact
luoyang-10	83	male			27/01/2020	27/01/2020	luoyang-20	63	male			luoyang	6/2/2020	6/2/2020	no	The People_ Government of Luoyang Municipality	http://www.ly.gov.cn	Ali		luoyang	luoyang	unknown	unknown	27/01/2020	4/2/2020	4/2/2020	5/2/2020	unknown	close contact	luoyang	unknown	2/2/2020	6/2/2020	10/2/2020	10/2/2020	12/2/2020	unknown	close contact
nanyang-63	56	female			24/01/2020	24/01/2020	nanyang-110	59	female			nanyang	1/2/2020	1/2/2020	no	Nanyang Municipal Health Commussion	http://nyws.nanyang.gov.cn/	Ali		nanyang	nanyang	unknown	unknown	unknown	1/2/2020	1/2/2020	2/2/2020	unknown	close contact	nanyang	unknown	unknown	unknown	5/2/2020	5/2/2020	6/2/2020	unknown	close contact
nanyang-32	29	male			22/01/2020	22/01/2020	nanyang-117	30	male			nanyang	1/2/2020	1/2/2020	no	Nanyang Municipal Health Commussion	http://nyws.nanyang.gov.cn/	Ali		nanyang	wuhan, Hubei Province	18/01/2020	unknown	unknown	28/01/2020	28/01/2020	29/01/2020	unknown	close contact	nanyang	unknown	unknown	unknown	6/2/2020	6/2/2020	7/2/2020	unknown	close contact
nanyang-91	69	female			28/01/2020	28/01/2020	nanyang-118	54	male			nanyang	3/2/2020	3/2/2020	no	Nanyang Municipal Health Commussion	http://nyws.nanyang.gov.cn/	Ali		nanyang	nanyang	unknown	unknown	unknown	3/2/2020	3/2/2020	4/2/2020	unknown	sister	nanyang	unknown	unknown	unknown	7/2/2020	7/2/2020	8/2/2020	unknown	brother
nanyang-19	55	female			20/01/2020	20/01/2020	nanyang-130	79	female			nanyang	2/2/2020	2/2/2020	no	Nanyang Municipal Health Commussion	http://nyws.nanyang.gov.cn/	Ali		nanyang	wuhan, Hubei Province	14/01/2020	unknown	unknown	27/01/2020	27/01/2020	28/01/2020	mild	close contact	nanyang	unknown	unknown	unknown	8/2/2020	8/2/2020	9/2/2020	unknown	close contact
nanyang-136	55	female			3/2/2020	3/2/2020	nanyang-137	35	male			nanyang	6/2/2020	6/2/2020	no	Nanyang Municipal Health Commussion	http://nyws.nanyang.gov.cn/	Ali		nanyang	nanyang	unknown	unknown	3/2/2020	11/2/2020	11/2/2020	12/2/2020	unknown	close contact	nanyang	unknown	unknown	6/2/2020	11/2/2020	11/2/2020	12/2/2020	unknown	close contact
nanyang-123	44	female			5/2/2020	5/2/2020	nanyang-141	55	female			nanyang	7/2/2020	7/2/2020	no	Nanyang Municipal Health Commussion	http://nyws.nanyang.gov.cn/	Ali		nanyang	nanyang	unknown	unknown	unknown	7/2/2020	7/2/2020	8/2/2020	unknown	relative	nanyang	unknown	unknown	7/2/2020	12/2/2020	12/2/2020	13/02/2020	unknown	relative
nanyang-56	48	male			29/01/2020	29/01/2020	nanyang-142	35	male			nanyang	6/2/2020	6/2/2020	no	Nanyang Municipal Health Commussion	http://nyws.nanyang.gov.cn/	Ali		nanyang	nanyang	unknown	unknown	unknown	1/2/2020	1/2/2020	2/2/2020	unknown	close contact	nanyang	unknown	unknown	6/2/2020	12/2/2020	12/2/2020	13/02/2020	unknown	close contact
nanyang-56	48	male			29/01/2020	29/01/2020	nanyang-153	37	female			nanyang	1/2/2020	1/2/2020	no	Nanyang Municipal Health Commussion	http://nyws.nanyang.gov.cn/	Ali		nanyang	nanyang	unknown	unknown	unknown	1/2/2020	1/2/2020	2/2/2020	unknown	close contact	nanyang	unknown	unknown	unknown	16/02/2020	16/02/2020	17/02/2020	unknown	close contact
nanyang-2	62	male			22/01/2020	22/01/2020	nanyang-49	69	male			nanyang	23/01/2020	23/01/2020	no	Nanyang Municipal Health Commussion	http://nyws.nanyang.gov.cn/	Ali		nanyang	wuhan, Hubei Province	unknown	unknown	22/01/2020	22/01/2020	24/01/2020	25/01/2020	unknown	close contact	nanyang	unknown	unknown	unknown	29/01/2020	29/01/2020	30/01/2020	unknown	close contact
nanyang-19	55	female			20/01/2020	20/01/2020	nanyang-56	48	male			nanyang	29/01/2020	29/01/2020	no	Nanyang Municipal Health Commussion	http://nyws.nanyang.gov.cn/	Ali		nanyang	wuhan, Hubei Province	14/01/2020	unknown	unknown	27/01/2020	27/01/2020	28/01/2020	mild	close contact	nanyang	unknown	unknown	unknown	1/2/2020	1/2/2020	2/2/2020	unknown	close contact
nanyang-19	55	female			20/01/2020	20/01/2020	nanyang-57	33	female			nanyang	28/01/2020	28/01/2020	no	Nanyang Municipal Health Commussion	http://nyws.nanyang.gov.cn/	Ali		nanyang	wuhan, Hubei Province	14/01/2020	unknown	unknown	27/01/2020	27/01/2020	28/01/2020	mild	close contact	nanyang	unknown	unknown	unknown	1/2/2020	1/2/2020	2/2/2020	unknown	close contact
nanyang-19	55	female			20/01/2020	20/01/2020	nanyang-59	30	female			nanyang	30/01/2020	30/01/2020	no	Nanyang Municipal Health Commussion	http://nyws.nanyang.gov.cn/	Ali		nanyang	wuhan, Hubei Province	14/01/2020	unknown	unknown	27/01/2020	27/01/2020	28/01/2020	mild	close contact	nanyang	unknown	unknown	unknown	1/2/2020	1/2/2020	2/2/2020	unknown	close contact
nanyang-40	59	male			14/01/2020	14/01/2020	nanyang-63	56	female			nanyang	24/01/2020	24/01/2020	no	Nanyang Municipal Health Commussion	http://nyws.nanyang.gov.cn/	Ali		nanyang	nanyang	unknown	unknown	unknown	29/01/2020	29/01/2020	30/01/2020	unknown	relative	nanyang	unknown	unknown	unknown	1/2/2020	1/2/2020	2/2/2020	unknown	relative
nanyang-53	22	male			29/01/2020	29/01/2020	nanyang-99	54	female			nanyang	1/2/2020	1/2/2020	no	Nanyang Municipal Health Commussion	http://nyws.nanyang.gov.cn/	Ali		nanyang	wuhan, Hubei Province	21/01/2020	unknown	unknown	31/01/2020	31/01/2020	1/2/2020	unknown	close contact	nanyang	unknown	unknown	unknown	4/2/2020	4/2/2020	5/2/2020	unknown	close contact
xinyang-6	46	male			18/01/2020	18/01/2020	xinyang-10	56	female			xinyang	27/01/2020	27/01/2020	no	Xinyang Municipal Health Commussion	http://www.hnxywjw.gov.cn/	Ali		xinyang	wuhan, Hubei Province	18/01/2020	unknown	23/01/2020	24/01/2020	24/01/2020	25/01/2020	unknown	brother	xinyang	unknown	unknown	25/01/2020	27/01/2020	27/01/2020	28/01/2020	unknown	sister
xinyang-6	46	male			18/01/2020	18/01/2020	xinyang-100	57	male			xinyang	29/01/2020	29/01/2020	no	Xinyang Municipal Health Commussion	http://www.hnxywjw.gov.cn/	Ali		xinyang	wuhan, Hubei Province	18/01/2020	unknown	23/01/2020	24/01/2020	24/01/2020	25/01/2020	unknown	close contact	xinyang	unknown	unknown	29/01/2020	3/2/2020	3/2/2020	4/2/2020	unknown	close contact
xinyang-73	53	male			19/01/2020	19/01/2020	xinyang-117	28	female			xinyang	22/01/2020	22/01/2020	no	Xinyang Municipal Health Commussion	http://www.hnxywjw.gov.cn/	Ali		xinyang	xinyang	unknown	unknown	29/01/2020	1/2/2020	1/2/2020	2/2/2020	unknown	close contact	xinyang	unknown	unknown	2/2/2020	4/2/2020	4/2/2020	5/2/2020	unknown	close contact
xinyang-11	52	male			18/01/2020	18/01/2020	xinyang-121	44	male			xinyang	28/01/2020	28/01/2020	no	Xinyang Municipal Health Commussion	http://www.hnxywjw.gov.cn/	Ali		xinyang	xinyang	unknown	unknown	23/01/2020	29/01/2020	29/01/2020	30/01/2020	unknown	close contact	xinyang	unknown	unknown	1/2/2020	4/2/2020	4/2/2020	5/2/2020	unknown	close contact
xinyang-11	52	male			18/01/2020	18/01/2020	xinyang-122	50	female			xinyang	26/01/2020	26/01/2020	no	Xinyang Municipal Health Commussion	http://www.hnxywjw.gov.cn/	Ali		xinyang	xinyang	unknown	unknown	23/01/2020	29/01/2020	29/01/2020	30/01/2020	unknown	close contact	xinyang	unknown	unknown	30/01/2020	4/2/2020	4/2/2020	5/2/2020	unknown	close contact
xinyang-109	45	female			27/01/2020	27/01/2020	xinyang-158	31	male			xinyang	2/2/2020	2/2/2020	no	Xinyang Municipal Health Commussion	http://www.hnxywjw.gov.cn/	Ali		xinyang	wuhan, Hubei Province	unknown	unknown	29/01/2020	3/2/2020	3/2/2020	4/2/2020	unknown	close contact	xinyang	unknown	unknown	2/2/2020	5/2/2020	5/2/2020	6/2/2020	unknown	close contact
xinyang-73	53	male			19/01/2020	19/01/2020	xinyang-180	48	male			xinyang	3/2/2020	3/2/2020	no	Xinyang Municipal Health Commussion	http://www.hnxywjw.gov.cn/	Ali		xinyang	xinyang	unknown	unknown	29/01/2020	1/2/2020	1/2/2020	2/2/2020	unknown	close contact	xinyang	unknown	unknown	4/2/2020	7/2/2020	7/2/2020	8/2/2020	unknown	close contact
xinyang-33	18	female			20/01/2020	20/01/2020	xinyang-187	69	female			xinyang	1/2/2020	1/2/2020	no	Xinyang Municipal Health Commussion	http://www.hnxywjw.gov.cn/	Ali		xinyang	wuhan, Hubei Province	19/01/2020	unknown	27/01/2020	29/01/2020	29/01/2020	30/01/2020	mild	close contact	xinyang	unknown	unknown	5/2/2020	7/2/2020	7/2/2020	8/2/2020	unknown	close contact
xinyang-159	61	male			27/01/2020	27/01/2020	xinyang-210	64	male			xinyang	6/2/2020	6/2/2020	no	Xinyang Municipal Health Commussion	http://www.hnxywjw.gov.cn/	Ali		xinyang	xinyang	unknown	unknown	4/2/2020	5/2/2020	5/2/2020	6/2/2020	unknown	close contact	xinyang	unknown	unknown	7/2/2020	9/2/2020	9/2/2020	10/2/2020	unknown	close contact
xinyang-109	45	female			27/01/2020	27/01/2020	xinyang-217	18	male			xinyang	2/2/2020	2/2/2020	no	Xinyang Municipal Health Commussion	http://www.hnxywjw.gov.cn/	Ali		xinyang	wuhan, Hubei Province	unknown	unknown	29/01/2020	3/2/2020	3/2/2020	4/2/2020	unknown	close contact	xinyang	unknown	unknown	7/2/2020	9/2/2020	9/2/2020	10/2/2020	unknown	close contact
xinyang-158	31	male			2/2/2020	2/2/2020	xinyang-218	17	male			xinyang	4/2/2020	4/2/2020	no	Xinyang Municipal Health Commussion	http://www.hnxywjw.gov.cn/	Ali		xinyang	xinyang	unknown	unknown	2/2/2020	5/2/2020	5/2/2020	6/2/2020	unknown	close contact	xinyang	unknown	unknown	6/2/2020	9/2/2020	9/2/2020	10/2/2020	unknown	close contact
xinyang-89	46	female			24/01/2020	24/01/2020	xinyang-221	53	male			xinyang	1/2/2020	1/2/2020	no	Xinyang Municipal Health Commussion	http://www.hnxywjw.gov.cn/	Ali		xinyang	wuhan, Hubei Province	15/01/2020	unknown	31/01/2020	2/2/2020	2/2/2020	3/2/2020	unknown	close contact	xinyang	unknown	unknown	8/2/2020	10/2/2020	10/2/2020	11/2/2020	unknown	close contact
xinyang-39	54	male			16/01/2020	16/01/2020	xinyang-227	51	male			xinyang	25/01/2020	25/01/2020	no	Xinyang Municipal Health Commussion	http://www.hnxywjw.gov.cn/	Ali		xinyang	xinyang	unknown	unknown	22/01/2020	24/01/2020	24/01/2020	25/01/2020	unknown	close contact	xinyang	unknown	unknown	6/2/2020	10/2/2020	10/2/2020	11/2/2020	unknown	close contact
xinyang-205	56	male			25/01/2020	25/01/2020	xinyang-236	54	female			xinyang	11/2/2020	11/2/2020	no	Xinyang Municipal Health Commussion	http://www.hnxywjw.gov.cn/	Ali		xinyang	xinyang	unknown	unknown	7/2/2020	8/2/2020	8/2/2020	9/2/2020	unknown	close contact	xinyang	unknown	unknown	11/2/2020	12/2/2020	12/2/2020	13/02/2020	unknown	close contact
xinyang-237	56	female			1/2/2020	1/2/2020	xinyang-248	57	male			xinyang	27/01/2020	27/01/2020	no	Xinyang Municipal Health Commussion	http://www.hnxywjw.gov.cn/	Ali		xinyang	xinyang	unknown	unknown	11/2/2020	12/2/2020	12/2/2020	13/02/2020	unknown	close contact	xinyang	unknown	unknown	13/02/2020	14/02/2020	14/02/2020	15/02/2020	unknown	close contact
xinyang-200	55	male			25/01/2020	25/01/2020	xinyang-255	26	female			xinyang	10/2/2020	10/2/2020	no	Xinyang Municipal Health Commussion	http://www.hnxywjw.gov.cn/	Ali		xinyang	wuhan, Hubei Province	18/01/2020	unknown	5/2/2020	8/2/2020	8/2/2020	9/2/2020	unknown	close contact	xinyang	unknown	unknown	11/2/2020	15/02/2020	15/02/2020	16/02/2020	unknown	close contact
xinyang-234	37	male			7/2/2020	7/2/2020	xinyang-257	46	male			xinyang	2/2/2020	2/2/2020	no	Xinyang Municipal Health Commussion	http://www.hnxywjw.gov.cn/	Ali		xinyang	unknown	20/01/2020	unknown	11/2/2020	12/2/2020	12/2/2020	13/02/2020	unknown	close contact	xinyang	unknown	unknown	14/02/2020	15/02/2020	15/02/2020	16/02/2020	unknown	close contact
xinyang-125	47	male			23/01/2020	23/01/2020	xinyang-265	56	female			xinyang	31/01/2020	31/01/2020	no	Xinyang Municipal Health Commussion	http://www.hnxywjw.gov.cn/	Ali		xinyang	wuhan, Hubei Province	19/01/2020	unknown	1/2/2020	4/2/2020	4/2/2020	5/2/2020	unknown	close contact	xinyang	unknown	unknown	9/2/2020	17/02/2020	17/02/2020	18/02/2020	unknown	close contact
xinyang-6	46	male			18/01/2020	18/01/2020	xinyang-9	45	female			xinyang	22/01/2020	22/01/2020	no	Xinyang Municipal Health Commussion	http://www.hnxywjw.gov.cn/	Ali		xinyang	wuhan, Hubei Province	18/01/2020	unknown	23/01/2020	24/01/2020	24/01/2020	25/01/2020	unknown	close contact	xinyang	unknown	unknown	25/01/2020	27/01/2020	27/01/2020	28/01/2020	unknown	close contact
xuchang-1	51	female			24/01/2020	24/01/2020	xuchang-18	63	male			xuchang	31/01/2020	31/01/2020	no	Xu Chang Municipal Health Commussion	http://xcswjw.xuchang.gov.cn/	Ali		xuchang	wuhan, Hubei Province	22/01/2020	unknown	24/01/2020	24/01/2020	24/01/2020	7/2/2020	unknown	relative	xuchang	unknown	28/01/2020	31/01/2020	unknown	unknown	7/2/2020	unknown	relative
xuchang-26	27	female			1/2/2020	1/2/2020	xuchang-35	49	female			xuchang	4/2/2020	4/2/2020	no	Xu Chang Municipal Health Commussion	http://xcswjw.xuchang.gov.cn/	Ali		xuchang	xuchang	unknown	4/2/2020	4/2/2020	unknown	unknown	7/2/2020	unknown	relative	xuchang	unknown	unknown	10/2/2020	11/2/2020	11/2/2020	12/2/2020	unknown	relative
xuchang-26	27	female			1/2/2020	1/2/2020	xuchang-36	80	male			xuchang	6/2/2020	6/2/2020	no	Xu Chang Municipal Health Commussion	http://xcswjw.xuchang.gov.cn/	Ali		xuchang	xuchang	unknown	4/2/2020	4/2/2020	unknown	unknown	7/2/2020	unknown	relative	xuchang	unknown	unknown	10/2/2020	11/2/2020	11/2/2020	12/2/2020	unknown	relative
xuchang-35	49	female			4/2/2020	4/2/2020	xuchang-37	58	female			xuchang	12/2/2020	12/2/2020	no	Xu Chang Municipal Health Commussion	http://xcswjw.xuchang.gov.cn/	Ali		xuchang	xuchang	unknown	unknown	10/2/2020	11/2/2020	11/2/2020	12/2/2020	unknown	relative	xuchang	unknown	11/2/2020	12/2/2020	13/02/2020	13/02/2020	14/02/2020	mild	relative
xuchang-35	49	female			4/2/2020	4/2/2020	xuchang-38	61	female			xuchang	10/2/2020	10/2/2020	no	Xu Chang Municipal Health Commussion	http://xcswjw.xuchang.gov.cn/	Ali		xuchang	xuchang	unknown	unknown	10/2/2020	11/2/2020	11/2/2020	12/2/2020	unknown	relative	xuchang	unknown	10/2/2020	10/2/2020	13/02/2020	13/02/2020	14/02/2020	mild	relative
xuchang-35	49	female			4/2/2020	4/2/2020	xuchang-39	55	female			xuchang	7/2/2020	7/2/2020	no	Xu Chang Municipal Health Commussion	http://xcswjw.xuchang.gov.cn/	Ali		xuchang	xuchang	unknown	unknown	10/2/2020	11/2/2020	11/2/2020	12/2/2020	unknown	relative	xuchang	unknown	unknown	11/2/2020	13/02/2020	13/02/2020	14/02/2020	mild	relative
zhengzhou-141	40	male			8/2/2020	8/2/2020	zhengzhou-128	82	male			zhengzhou	8/2/2020	8/2/2020	no	The People_ Government of Zhengzhou Municipality	http://www.zhengzhou.gov.cn	Ali		zhengzhou	wuhan, Hubei Province	23/01/2020	24/01/2020	8/2/2020	12/2/2020	12/2/2020	13/02/2020	unknown	relative	zhengzhou	unknown	24/01/2020	8/2/2020	9/2/2020	9/2/2020	10/2/2020	unknown	relative
zhengzhou-141	40	male			8/2/2020	8/2/2020	zhengzhou-130	74	female			zhengzhou	9/2/2020	9/2/2020	no	The People_ Government of Zhengzhou Municipality	http://www.zhengzhou.gov.cn	Ali		zhengzhou	wuhan, Hubei Province	23/01/2020	24/01/2020	8/2/2020	12/2/2020	12/2/2020	13/02/2020	unknown	relative	zhengzhou	unknown	unknown	9/2/2020	9/2/2020	9/2/2020	10/2/2020	unknown	relative
zhoukou-2	21	male			21/01/2020	21/01/2020	zhoukou-3	19	male			unknown	23/01/2020	23/01/2020	no	Zhoukou Municipal People's Government	http://www.hazhoukou.gov.cn/Home/gkml?code=gstg	Ali		zhoukou	wuhan, Hubei Province	17/01/2020	unknown	22/01/2020	22/01/2020	22/01/2020	27/01/2020	mild	friend	zhoukou	unknown	unknown	23/01/2020	23/01/2020	23/01/2020	27/01/2020	mild	friend
zhoukou-12	40	male			18/01/2020	18/01/2020	zhoukou-33	44	female			zhoukou	27/01/2020	27/01/2020	no	Zhoukou Municipal People's Government	http://www.hazhoukou.gov.cn/Home/gkml?code=gstg	Ali		zhoukou	wuhan, Hubei Province	unknown	unknown	26/01/2020	26/01/2020	26/01/2020	27/01/2020	mild	close contact	zhoukou	unknown	27/01/2020	27/01/2020	30/01/2020	30/01/2020	31/01/2020	mild	close contact
zhoukou-2	21	male			21/01/2020	21/01/2020	zhoukou-49	47	male			wuhan, Hubei Province	27/01/2020	27/01/2020	no	Zhoukou Municipal People's Government	http://www.hazhoukou.gov.cn/Home/gkml?code=gstg	Ali		zhoukou	wuhan, Hubei Province	17/01/2020	unknown	22/01/2020	22/01/2020	22/01/2020	27/01/2020	mild	friend	zhoukou	23/01/2020	28/01/2020	28/01/2020	2/2/2020	2/2/2020	3/2/2020	mild	friend
zhoukou-20	35	male			23/01/2020	23/01/2020	zhoukou-53	31	female			zhoukou	19/01/2020	19/01/2020	no	Zhoukou Municipal People's Government	http://www.hazhoukou.gov.cn/Home/gkml?code=gstg	Ali		zhoukou	wuhan, Hubei Province	unknown	unknown	26/01/2020	28/01/2020	28/01/2020	29/01/2020	mild	close contact	zhoukou	unknown	1/2/2020	1/2/2020	2/2/2020	2/2/2020	3/2/2020	mild	close contact
zhoukou-60	70	male			29/01/2020	29/01/2020	zhoukou-62	25	female			zhoukou	30/01/2020	30/01/2020	no	Zhoukou Municipal People's Government	http://www.hazhoukou.gov.cn/Home/gkml?code=gstg	Ali		zhoukou	zhoukou	unknown	3/2/2020	30/01/2020	4/2/2020	4/2/2020	5/2/2020	mild	relative	zhoukou	unknown	unknown	4/2/2020	5/2/2020	5/2/2020	6/2/2020	mild	relative
zhoukou-62	25	female			30/01/2020	30/01/2020	zhoukou-68	22	male			unknown	8/2/2020	8/2/2020	no	Zhoukou Municipal People's Government	http://www.hazhoukou.gov.cn/Home/gkml?code=gstg	Ali		zhoukou	zhoukou	unknown	unknown	4/2/2020	5/2/2020	5/2/2020	6/2/2020	mild	relative	zhoukou	18/01/2020	8/2/2020	11/2/2020	11/2/2020	11/2/2020	12/2/2020	mild	relative
zhoukou-17	33	male			25/01/2020	25/01/2020	zhoukou-70	56	male			zhoukou	8/2/2020	8/2/2020	no	Zhoukou Municipal People's Government	http://www.hazhoukou.gov.cn/Home/gkml?code=gstg	Ali		zhoukou	wuhan, Hubei Province	unknown	unknown	27/01/2020	27/01/2020	27/01/2020	28/01/2020	mild	close contact	zhoukou	unknown	9/2/2020	9/2/2020	12/2/2020	12/2/2020	13/02/2020	mild	close contact
zhoukou-7	26	male			17/01/2020	17/01/2020	zhoukou-8	28	female			zhoukou	23/01/2020	23/01/2020	no	Zhoukou Municipal People's Government	http://www.hazhoukou.gov.cn/Home/gkml?code=gstg	Ali		zhoukou	unknown	19/01/2020	unknown	25/01/2020	25/01/2020	25/01/2020	27/01/2020	mild	brother	zhoukou	unknown	unknown	25/01/2020	25/01/2020	25/01/2020	27/01/2020	mild	brother
zhoukou-7	26	male			17/01/2020	17/01/2020	zhoukou-9	51	female			zhoukou	24/01/2020	24/01/2020	no	Zhoukou Municipal People's Government	http://www.hazhoukou.gov.cn/Home/gkml?code=gstg	Ali		zhoukou	unknown	19/01/2020	unknown	25/01/2020	25/01/2020	25/01/2020	27/01/2020	mild	close contact	zhoukou	unknown	unknown	25/01/2020	25/01/2020	25/01/2020	27/01/2020	mild	close contact
zhumadian-4	31	male			31/01/2020	31/01/2020	zhumadian-13	57	male			zhumadian	11/2/2020	11/2/2020	no	Zhumadian Municipal People's Government	https://www.zhumadian.gov.cn/html/site_gov/welcome/index.html	Ali		zhumadian	unknown	20/01/2020	6/2/2020	6/2/2020	10/2/2020	10/2/2020	11/2/2020	unknown	close contact	zhumadian	unknown	unknown	11/2/2020	13/02/2020	13/02/2020	14/02/2020	unknown	close contact
zhumadian-4	31	male			31/01/2020	31/01/2020	zhumadian-14	57	female			zhumadian	11/2/2020	11/2/2020	no	Zhumadian Municipal People's Government	https://www.zhumadian.gov.cn/html/site_gov/welcome/index.html	Ali		zhumadian	unknown	20/01/2020	6/2/2020	6/2/2020	10/2/2020	10/2/2020	11/2/2020	unknown	close contact	zhumadian	unknown	unknown	11/2/2020	13/02/2020	13/02/2020	14/02/2020	unknown	close contact
changde-67	62	female			1/2/2020	1/2/2020	changde-68	53	female			changde	24/01/2020	24/01/2020	no	Changde Municipal Health Commussion	http://wjw.changde.gov.cn	Ali		changde	changde	unknown	unknown	9/2/2020	11/2/2020	11/2/2020	12/2/2020	unknown	friend	changde	local	unknown	9/2/2020	11/2/2020	11/2/2020	12/2/2020	unknown	friend
changde-68	53	female			24/01/2020	24/01/2020	changde-69	65	female			changde	1/2/2020	1/2/2020	no	Changde Municipal Health Commussion	http://wjw.changde.gov.cn	Ali		changde	changde	local	unknown	9/2/2020	11/2/2020	11/2/2020	12/2/2020	unknown	sister	changde	local	unknown	4/2/2020	12/2/2020	12/2/2020	13/02/2020	unknown	sister
huaihua-5	36	female			7/1/2020	7/1/2020	huaihua-6	31	male			huaihua	10/1/2020	10/1/2020	no	Huaihua Municipal Health Commussion	http://www.huaihua.gov.cn/wsjkw/c100577/list.shtml	Ali		huaihua	wuhan, Hubei Province	unknown	unknown	15/01/2020	23/01/2020	23/01/2020	23/01/2020	mild	workmate	huaihua	local	unknown	15/01/2020	23/01/2020	23/01/2020	23/01/2020	unknown	workmate
huaihua-6	31	male			10/1/2020	10/1/2020	huaihua-7	41	female			wuhan, Hubei Province	13/01/2020	13/01/2020	no	Huaihua Municipal Health Commussion	http://www.huaihua.gov.cn/wsjkw/c100577/list.shtml	Ali		huaihua	huaihua	local	unknown	15/01/2020	23/01/2020	23/01/2020	23/01/2020	unknown	workmate	huaihua	unknown	unknown	17/01/2020	22/01/2020	22/01/2020	23/01/2020	mild	workmate
yongzhou-4	25	male			26/01/2020	26/01/2020	yongzhou-5	53	female			unknown	28/01/2020	28/01/2020	no	Yongzhou Municipal Health Commussion	http://wjw.yzcity.gov.cn	Ali		yongzhou	wuhan, Hubei Province	17/01/2020	unknown	unknown	2/2/2020	2/2/2020	3/2/2020	mild	close contact	yongzhou	unknown	unknown	unknown	2/2/2020	2/2/2020	3/2/2020	mild	close contact
yongzhou-5	53	female			28/01/2020	28/01/2020	yongzhou-8	32	male			unknown	1/2/2020	1/2/2020	no	Yongzhou Municipal Health Commussion	http://wjw.yzcity.gov.cn	Ali		yongzhou	unknown	unknown	unknown	unknown	2/2/2020	2/2/2020	3/2/2020	mild	close contact	yongzhou	unknown	unknown	unknown	6/2/2020	6/2/2020	7/2/2020	mild	close contact
dingxi-4	54	female			21/01/2020	21/01/2020	dingxi-2	42	female			taiguo	28/01/2020	28/01/2020	no	Health Commussion of Gansu Province	http://wsjk.gansu.gov.cn/	Ali		dingxi	taiguo	21/01/2020	unknown	4/2/2020	4/2/2020	7/2/2020	7/2/2020	mild	close contact	dingxi	21/01/2020	unknown	4/2/2020	4/2/2020	5/2/2020	5/2/2020	mild	close contact
dingxi-4	54	female			21/01/2020	21/01/2020	dingxi-3	26	female			taiguo	1/2/2020	1/2/2020	no	Health Commussion of Gansu Province	http://wsjk.gansu.gov.cn/	Ali		dingxi	taiguo	21/01/2020	unknown	4/2/2020	4/2/2020	7/2/2020	7/2/2020	mild	close contact	dingxi	21/01/2020	unknown	4/2/2020	4/2/2020	5/2/2020	5/2/2020	mild	close contact
dingxi-4	54	female			21/01/2020	21/01/2020	dingxi-5	29	female			taiguo	24/01/2020	24/01/2020	no	Health Commussion of Gansu Province	http://wsjk.gansu.gov.cn/	Ali		dingxi	taiguo	21/01/2020	unknown	4/2/2020	4/2/2020	7/2/2020	7/2/2020	mild	close contact	dingxi	21/01/2020	unknown	4/2/2020	4/2/2020	7/2/2020	7/2/2020	mild	close contact
dingxi-4	54	female			21/01/2020	21/01/2020	dingxi-6	38	female			taiguo	21/01/2020	21/01/2020	no	Health Commussion of Gansu Province	http://wsjk.gansu.gov.cn/	Ali		dingxi	taiguo	21/01/2020	unknown	4/2/2020	4/2/2020	7/2/2020	7/2/2020	mild	close contact	dingxi	21/01/2020	unknown	4/2/2020	4/2/2020	7/2/2020	7/2/2020	mild	close contact
gannan-1	60	male			28/01/2020	28/01/2020	gannan-7	53	female			gannan	4/2/2020	4/2/2020	no	Gannan Tibetan Autonomous Prefecture Health Commission	http://wsjk.gnzrmzf.gov.cn	Ali		gannan	gannan	local	unknown	30/01/2020	30/01/2020	1/2/2020	1/2/2020	mild	close contact	gannan	local	unknown	11/2/2020	11/2/2020	12/2/2020	13/02/2020	mild	close contact
lanzhou-19	51	female			21/01/2020	21/01/2020	lanzhou-26	29	male			lanzhou	7/2/2020	7/2/2020	no	Health Commussion of Gansu Province	http://wsjk.gansu.gov.cn/	Ali		dingxi	taiguo	21/01/2020	unknown	26/01/2020	3/2/2020	3/2/2020	3/2/2020	mild	close contact	lanzhou	local	30/01/2020	7/2/2020	7/2/2020	9/2/2020	11/2/2020	mild	close contact
lanzhou-19	51	female			21/01/2020	21/01/2020	lanzhou-27	47	male			lanzhou	6/2/2020	6/2/2020	no	Health Commussion of Gansu Province	http://wsjk.gansu.gov.cn/	Ali		dingxi	taiguo	21/01/2020	unknown	26/01/2020	3/2/2020	3/2/2020	3/2/2020	mild	close contact	lanzhou	local	unknown	6/2/2020	6/2/2020	9/2/2020	11/2/2020	mild	close contact
pingliang-1	29	male			30/01/2020	30/01/2020	pingliang-7	54	male			pingliang	10/2/2020	10/2/2020	no	Gansu Province Municipal Health Commussion	http://wjw.pingliang.gov.cn/	Ali		pingliang	pingliang	local	unknown	31/01/2020	31/01/2020	7/2/2020	7/2/2020	severe	close contact	pingliang	local	unknown	6/2/2020	6/2/2020	10/2/2020	11/2/2020	mild	close contact
pingliang-1	29	male			30/01/2020	30/01/2020	pingliang-8	34	female			pingliang	10/2/2020	10/2/2020	no	Gansu Province Municipal Health Commussion	http://wjw.pingliang.gov.cn/	Ali		pingliang	pingliang	local	unknown	31/01/2020	31/01/2020	7/2/2020	7/2/2020	severe	brother	pingliang	local	7/2/2020	11/2/2020	11/2/2020	14/02/2020	14/02/2020	mild	sister
tianshui-1	63	male			28/01/2020	28/01/2020	tianshui-10	55	female			tianshui	29/01/2020	29/01/2020	no	Health Commussion of Gansu Province	http://wsjk.gansu.gov.cn	Ali		tianshui	wuhan, Hubei Province	20/01/2020	unknown	28/01/2020	28/01/2020	31/01/2020	31/01/2020	mild	close contact	tianshui	local	unknown	31/01/2020	31/01/2020	8/2/2020	8/2/2020	mild	close contact
tianshui-1	63	male			28/01/2020	28/01/2020	tianshui-9	68	male			tianshui	26/01/2020	26/01/2020	no	Health Commussion of Gansu Province	http://wsjk.gansu.gov.cn	Ali		tianshui	wuhan, Hubei Province	20/01/2020	unknown	28/01/2020	28/01/2020	31/01/2020	31/01/2020	mild	close contact	tianshui	local	unknown	29/01/2020	29/01/2020	8/2/2020	8/2/2020	severe	close contact
tieling-1	51	male			22/01/2020	22/01/2020	tieling-3	51	male			tieling	25/01/2020	25/01/2020	no	Tieling Municipal Health Commussion	http://wjw.tieling.gov.cn/tielingws/tzgg/index.html	Ali		tieling	unknown	17/01/2020	unknown	22/01/2020	23/01/2020	24/01/2020	25/01/2020	unknown	close contact	tieling	local	unknown	29/01/2020	29/01/2020	31/01/2020	1/2/2020	mild	close contact
baoji-7	64	male			29/01/2020	29/01/2020	baoji-12	71	male			baoji	3/2/2020	3/2/2020	no	Baoji Municipal Health Commussion	http://wjw.baoji.gov.cn	Ali		baoji	baoji	local	unknown	30/01/2020	2/2/2020	2/2/2020	2/2/2020	mild	close contact	baoji	local	unknown	3/2/2020	7/2/2020	7/2/2020	7/2/2020	mild	close contact
baoji-4	46	male			21/01/2020	21/01/2020	baoji-7	64	male			baoji	29/01/2020	29/01/2020	no	Baoji Municipal Health Commussion	http://wjw.baoji.gov.cn	Ali		baoji	wuhan, Hubei Province	13/01/2020	unknown	22/01/2020	29/01/2020	29/01/2020	29/01/2020	mild	cousin	baoji	local	unknown	30/01/2020	2/2/2020	2/2/2020	2/2/2020	mild	cousin
baoji-4	46	male			21/01/2020	21/01/2020	baoji-9	56	male			baoji	21/01/2020	21/01/2020	no	Baoji Municipal Health Commussion	http://wjw.baoji.gov.cn	Ali		baoji	wuhan, Hubei Province	13/01/2020	unknown	22/01/2020	29/01/2020	29/01/2020	29/01/2020	mild	close contact	baoji	local	unknown	23/01/2020	4/2/2020	4/2/2020	4/2/2020	mild	close contact
hanzhong-25	50	male			18/01/2020	18/01/2020	hanzhong-11	41	male			hanzhong	29/01/2020	29/01/2020	no	Shanxi Province Municipal Health Commussion	http://sxwjw.shaanxi.gov.cn/	Ali		hanzhong	wuhan, Hubei Province	17/01/2020	unknown	22/01/2020	27/01/2020	27/01/2020	27/01/2020	mild	close contact	hanzhong	local	27/01/2020	29/01/2020	1/2/2020	1/2/2020	1/2/2020	mild	close contact
hanzhong-14	41	male			31/01/2020	31/01/2020	hanzhong-18	62	female			hanzhong	27/01/2020	27/01/2020	no	Shanxi Province Municipal Health Commussion	http://sxwjw.shaanxi.gov.cn/	Ali		hanzhong	hanzhong	local	unknown	31/01/2020	4/2/2020	4/2/2020	4/2/2020	mild	close contact	hanzhong	local	unknown	28/01/2020	6/2/2020	6/2/2020	6/2/2020	mild	close contact
hanzhong-25	50	male			18/01/2020	18/01/2020	hanzhong-3	49	male			hanzhong	21/01/2020	21/01/2020	no	Shanxi Province Municipal Health Commussion	http://sxwjw.shaanxi.gov.cn/	Ali		hanzhong	wuhan, Hubei Province	17/01/2020	unknown	22/01/2020	27/01/2020	27/01/2020	27/01/2020	mild	close contact	hanzhong	local	unknown	26/01/2020	29/01/2020	29/01/2020	29/01/2020	mild	close contact
hanzhong-25	50	male			18/01/2020	18/01/2020	hanzhong-5	67	male			hanzhong	24/01/2020	24/01/2020	no	Shanxi Province Municipal Health Commussion	http://sxwjw.shaanxi.gov.cn/	Ali		hanzhong	wuhan, Hubei Province	17/01/2020	unknown	22/01/2020	27/01/2020	27/01/2020	27/01/2020	mild	close contact	hanzhong	local	unknown	24/01/2020	31/01/2020	31/01/2020	31/01/2020	mild	close contact
hanzhong-25	50	male			18/01/2020	18/01/2020	hanzhong-6	35	female			wuhan, Hubei Province	27/01/2020	27/01/2020	no	Shanxi Province Municipal Health Commussion	http://sxwjw.shaanxi.gov.cn/	Ali		hanzhong	wuhan, Hubei Province	17/01/2020	unknown	22/01/2020	27/01/2020	27/01/2020	27/01/2020	mild	close contact	hanzhong	17/01/2020	unknown	27/01/2020	31/01/2020	31/01/2020	31/01/2020	mild	close contact
xian-1	32	female			16/01/2020	16/01/2020	shangluo-1	32	female			shangluo	25/01/2020	25/01/2020	no	Shanxi Province Municipal Health Commussion	http://sxwjw.shaanxi.gov.cn/	Ali		xian	hangzhou	14/01/2020	unknown	20/01/2020	21/01/2020	23/01/2020	23/01/2020	mild	close contact	shangluo	local	unknown	26/01/2020	28/01/2020	28/01/2020	28/01/2020	mild	close contact
xian-44	50	female			31/01/2020	31/01/2020	xian-111	50	male			xian	28/01/2020	28/01/2020	no	Shanxi Province Municipal Health Commussion	http://sxwjw.shaanxi.gov.cn/	Ali		xian	xian	local	unknown	1/2/2020	2/2/2020	2/2/2020	2/2/2020	mild	close contact	xian	9/1/2020	unknown	2/2/2020	2/2/2020	13/02/2020	13/02/2020	mild	close contact
xian-87	22	male			31/01/2020	31/01/2020	xian-112	89	male			xian	9/2/2020	9/2/2020	no	Shanxi Province Municipal Health Commussion	http://sxwjw.shaanxi.gov.cn/	Ali		xian	wuhan, Hubei Province	14/01/2020	unknown	31/01/2020	8/2/2020	8/2/2020	8/2/2020	mild	close contact	xian	local	unknown	10/2/2020	10/2/2020	13/02/2020	13/02/2020	mild	close contact
xian-86	31	female			31/01/2020	31/01/2020	xian-113	81	female			xian	6/2/2020	6/2/2020	no	Shanxi Province Municipal Health Commussion	http://sxwjw.shaanxi.gov.cn/	Ali		xian	xian	local	unknown	4/2/2020	8/2/2020	8/2/2020	8/2/2020	mild	close contact	xian	local	5/2/2020	11/2/2020	13/02/2020	13/02/2020	13/02/2020	mild	close contact
xian-112	89	male			9/2/2020	9/2/2020	xian-117	56	female			xian	12/2/2020	12/2/2020	no	Shanxi Province Municipal Health Commussion	http://sxwjw.shaanxi.gov.cn/	Ali		xian	xian	local	unknown	10/2/2020	10/2/2020	13/02/2020	13/02/2020	mild	close contact	xian	local	11/2/2020	13/02/2020	19/02/2020	19/02/2020	19/02/2020	mild	close contact
hanzhong-26	40	female			18/01/2020	18/01/2020	xian-12	46	female			xian	22/01/2020	22/01/2020	no	Shanxi Province Municipal Health Commussion	http://sxwjw.shaanxi.gov.cn/	Ali		hanzhong	wuhan, Hubei Province	17/01/2020	unknown	22/01/2020	27/01/2020	27/01/2020	27/01/2020	mild	close contact	xian	local	unknown	23/01/2020	29/01/2020	29/01/2020	29/01/2020	mild	close contact
xian-21	49	female			24/01/2020	24/01/2020	xian-48	47	female			xian	25/01/2020	25/01/2020	no	Shanxi Province Municipal Health Commussion	http://sxwjw.shaanxi.gov.cn/	Ali		xian	shanghai	17/01/2020	unknown	24/01/2020	31/01/2020	31/01/2020	31/01/2020	mild	friend	xian	local	unknown	28/01/2020	3/2/2020	3/2/2020	3/2/2020	mild	friend
xian-27	13	male			26/01/2020	26/01/2020	xian-49	54	male			xian	30/01/2020	30/01/2020	no	Shanxi Province Municipal Health Commussion	http://sxwjw.shaanxi.gov.cn/	Ali		xian	xiaogan, Hubei Province	20/01/2020	unknown	28/01/2020	31/01/2020	31/01/2020	31/01/2020	mild	close contact	xian	local	29/01/2020	29/01/2020	3/2/2020	3/2/2020	3/2/2020	mild	close contact
hanzhong-25	50	male			18/01/2020	18/01/2020	xian-50	50	male			xian	29/01/2020	29/01/2020	no	Shanxi Province Municipal Health Commussion	http://sxwjw.shaanxi.gov.cn/	Ali		hanzhong	wuhan, Hubei Province	17/01/2020	unknown	22/01/2020	27/01/2020	27/01/2020	27/01/2020	mild	close contact	xian	local	29/01/2020	29/01/2020	31/01/2020	3/2/2020	3/2/2020	mild	close contact
xian-13	66	male			18/01/2020	18/01/2020	xian-52	35	female			xian	25/01/2020	25/01/2020	no	Shanxi Province Municipal Health Commussion	http://sxwjw.shaanxi.gov.cn/	Ali		xian	xian	local	unknown	18/01/2020	29/01/2020	29/01/2020	29/01/2020	mild	close contact	xian	local	unknown	31/01/2020	3/2/2020	3/2/2020	3/2/2020	mild	close contact
xian-21	49	female			24/01/2020	24/01/2020	xian-62	50	female			xian	31/01/2020	31/01/2020	no	Shanxi Province Municipal Health Commussion	http://sxwjw.shaanxi.gov.cn/	Ali		xian	shanghai	17/01/2020	unknown	24/01/2020	31/01/2020	31/01/2020	31/01/2020	mild	sister	xian	local	31/01/2020	unknown	5/2/2020	5/2/2020	5/2/2020	mild	sister
xian-37	40	male			28/01/2020	28/01/2020	xian-64	33	male			xian	24/01/2020	24/01/2020	no	Shanxi Province Municipal Health Commussion	http://sxwjw.shaanxi.gov.cn/	Ali		xian	wuhan, Hubei Province	18/01/2020	unknown	28/01/2020	1/2/2020	1/2/2020	1/2/2020	mild	friend	xian	local	unknown	25/01/2020	5/2/2020	5/2/2020	5/2/2020	mild	friend
xian-83	57	female			27/01/2020	27/01/2020	xian-90	50	male			huayin	5/2/2020	5/2/2020	no	Shanxi Province Municipal Health Commussion	http://sxwjw.shaanxi.gov.cn/	Ali		xian	xian	local	unknown	27/01/2020	8/2/2020	8/2/2020	8/2/2020	mild	close contact	xian	23/01/2020	unknown	6/2/2020	9/2/2020	9/2/2020	9/2/2020	mild	close contact
xian-13	66	male			18/01/2020	18/01/2020	xian-91	43	male			xian	3/2/2020	3/2/2020	no	Shanxi Province Municipal Health Commussion	http://sxwjw.shaanxi.gov.cn/	Ali		xian	xian	local	unknown	18/01/2020	29/01/2020	29/01/2020	29/01/2020	mild	close contact	xian	local	27/01/2020	5/2/2020	9/2/2020	9/2/2020	9/2/2020	mild	close contact
xian-83	57	female			27/01/2020	27/01/2020	xian-97	70	female			xian	25/01/2020	25/01/2020	no	Shanxi Province Municipal Health Commussion	http://sxwjw.shaanxi.gov.cn/	Ali		xian	xian	local	unknown	27/01/2020	8/2/2020	8/2/2020	8/2/2020	mild	close contact	xian	local	unknown	1/2/2020	10/2/2020	10/2/2020	10/2/2020	mild	close contact
xian-13	66	male			18/01/2020	18/01/2020	xian-98	81	male			xian	20/01/2020	20/01/2020	no	Shanxi Province Municipal Health Commussion	http://sxwjw.shaanxi.gov.cn/	Ali		xian	xian	local	unknown	18/01/2020	29/01/2020	29/01/2020	29/01/2020	mild	close contact	xian	local	unknown	20/01/2020	9/2/2020	11/2/2020	11/2/2020	mild	close contact
hanzhong-7	37	male			27/01/2020	27/01/2020	xianyang-10	41	female			xianyang	25/01/2020	25/01/2020	no	Shanxi Province Municipal Health Commussion	http://sxwjw.shaanxi.gov.cn/	Ali		hanzhong	wuhan, Hubei Province	16/01/2020	unknown	29/01/2020	31/01/2020	31/01/2020	31/01/2020	mild	close contact	xianyang	local	unknown	25/01/2020	4/2/2020	4/2/2020	4/2/2020	mild	close contact
daqing-7	unknown	unknown			23/01/2020	23/01/2020	daqing-12	unknown	female			daqing	2/2/2020	2/2/2020	no	Daqing Municipal People's Government	http://www.daqing.gov.cn/	Ali		daqing	wuhan, Hubei Province	21/01/2020	24/01/2020	24/01/2020	28/01/2020	30/01/2020	5/2/2020	unknown	relative	daqing	local	unknown	2/2/2020	2/2/2020	10/2/2020	11/2/2020	unknown	relative
daqing-1	unknown	female			18/01/2020	18/01/2020	daqing-3	unknown	female			daqing	21/01/2020	21/01/2020	no	Daqing Municipal People's Government	http://www.daqing.gov.cn/	Ali		daqing	wuhan, Hubei Province	14/01/2020	unknown	22/01/2020	22/01/2020	23/01/2020	5/2/2020	unknown	sister	daqing	local	22/01/2020	23/01/2020	23/01/2020	25/01/2020	5/2/2020	unknown	sister
23	47	male			26/01/2020	26/01/2020	26	74	female			Tianjin	30/01/2020	30/01/2020	Non-household	Tianjin Municipal Health Commission	http://wsjk.tj.gov.cn/	Du			Tianjin
23	47	male			26/01/2020	26/01/2020	27	75	male			Tianjin	30/01/2020	30/01/2020	Non-household	Tianjin Municipal Health Commission	http://wsjk.tj.gov.cn/	Du			Tianjin
28	61	female			25/01/2020	25/01/2020	30	61	male			Tianjin	31/01/2020	31/01/2020	Household	Tianjin Municipal Health Commission	http://wsjk.tj.gov.cn/	Du			Xiaogan
35	49	male			26/01/2020	26/01/2020	37	48	female			Tianjin	30/01/2020	30/01/2020	No information	Tianjin Municipal Health Commission	http://wsjk.tj.gov.cn/	Du			Tianjin
22	57	male			24/01/2020	24/01/2020	43	90	male			Tianjin	26/01/2020	26/01/2020	Non-household	Tianjin Municipal Health Commission	http://wsjk.tj.gov.cn/	Du			Wuhan
49	35	male			28/01/2020	28/01/2020	53	66	male			Tianjin	1/2/2020	1/2/2020	Household	Tianjin Municipal Health Commission	http://wsjk.tj.gov.cn/	Du			Tianjin
62	43	female			25/01/2020	25/01/2020	60	52	female			Tianjin	27/01/2020	27/01/2020	Non-household	Tianjin Municipal Health Commission	http://wsjk.tj.gov.cn/	Du			Beijing
60	52	female			27/01/2020	27/01/2020	61	53	male			Tianjin	28/01/2020	28/01/2020	Non-household	Tianjin Municipal Health Commission	http://wsjk.tj.gov.cn/	Du			Tianjin
60	52	female			27/01/2020	27/01/2020	63	35	female			Tianjin	21/01/2020	21/01/2020	Non-household	Tianjin Municipal Health Commission	http://wsjk.tj.gov.cn/	Du			Tianjin
63	35	female			21/01/2020	21/01/2020	64	26	female			Tianjin	29/01/2020	29/01/2020	Non-household	Tianjin Municipal Health Commission	http://wsjk.tj.gov.cn/	Du			Tianjin
65	66	female			2/2/2020	2/2/2020	67	37	female			Tianjin	30/01/2020	30/01/2020	Non-household	Tianjin Municipal Health Commission	http://wsjk.tj.gov.cn/	Du			Tianjin
66	36	female			27/01/2020	27/01/2020	71	31	male			Tianjin	1/2/2020	1/2/2020	Non-household	Tianjin Municipal Health Commission	http://wsjk.tj.gov.cn/	Du			Tianjin
68	46	female			31/01/2020	31/01/2020	74	76	female			Tianjin	3/2/2020	3/2/2020	Household	Tianjin Municipal Health Commission	http://wsjk.tj.gov.cn/	Du			Tianjin
88	43	female			2/2/2020	2/2/2020	79	45	male			Tianjin	2/2/2020	2/2/2020	Household	Tianjin Municipal Health Commission	http://wsjk.tj.gov.cn/	Du			Tianjin
76	65	female			1/2/2020	1/2/2020	82	65	male			Tianjin	31/01/2020	31/01/2020	Non-household	Tianjin Municipal Health Commission	http://wsjk.tj.gov.cn/	Du			Tianjin
63	35	female			21/01/2020	21/01/2020	84	42	female			Tianjin	3/2/2020	3/2/2020	Non-household	Tianjin Municipal Health Commission	http://wsjk.tj.gov.cn/	Du			Tianjin
63	35	female			21/01/2020	21/01/2020	85	36	male			Tianjin	4/2/2020	4/2/2020	Household	Tianjin Municipal Health Commission	http://wsjk.tj.gov.cn/	Du			Tianjin
76	65	female			1/2/2020	1/2/2020	86	56	female			Tianjin	27/01/2020	27/01/2020	Household	Tianjin Municipal Health Commission	http://wsjk.tj.gov.cn/	Du			Tianjin
76	65	female			1/2/2020	1/2/2020	87	65	male			Tianjin	31/01/2020	31/01/2020	Household	Tianjin Municipal Health Commission	http://wsjk.tj.gov.cn/	Du			Tianjin
22	57	male			24/01/2020	24/01/2020	93	56	female			Tianjin	1/2/2020	1/2/2020	Non-household	Tianjin Municipal Health Commission	http://wsjk.tj.gov.cn/	Du			Wuhan
95	34	male			22/01/2020	22/01/2020	96	42	male			Tianjin	28/01/2020	28/01/2020	Household	Tianjin Municipal Health Commission	http://wsjk.tj.gov.cn/	Du			Tianjin
97	80	male			9/1/2020	9/1/2020	98	59	male			Cangzhou	22/01/2020	22/01/2020	Non-household	Cangzhou Municipal Health Commission	https://weibo.com/cangzhounews	Du			Wuhan
97	80	male			9/1/2020	9/1/2020	106	41	male			Cangzhou	23/01/2020	23/01/2020	Non-household	Cangzhou Municipal Health Commission	https://weibo.com/cangzhounews	Du			Wuhan
97	80	male			9/1/2020	9/1/2020	107	61	male			Cangzhou	23/01/2020	23/01/2020	Non-household	Cangzhou Municipal Health Commission	https://weibo.com/cangzhounews	Du			Wuhan
97	80	male			9/1/2020	9/1/2020	108	62	male			Cangzhou	25/01/2020	25/01/2020	Non-household	Cangzhou Municipal Health Commission	https://weibo.com/cangzhounews	Du			Wuhan
109	29	female			23/01/2020	23/01/2020	110	85	female			Cangzhou	28/01/2020	28/01/2020	Household	Cangzhou Municipal Health Commission	https://weibo.com/cangzhounews	Du			Wuhan
97	80	male			9/1/2020	9/1/2020	111	72	female			Cangzhou	24/01/2020	24/01/2020	Non-household	Cangzhou Municipal Health Commission	https://weibo.com/cangzhounews	Du			Wuhan
103	38	male			25/01/2020	25/01/2020	112	49	female			Cangzhou	27/01/2020	27/01/2020	Non-household	Cangzhou Municipal Health Commission	https://weibo.com/cangzhounews	Du			Wuhan
97	80	male			9/1/2020	9/1/2020	119	51	female			Cangzhou	19/01/2020	19/01/2020	Non-household	Cangzhou Municipal Health Commission	https://weibo.com/cangzhounews	Du			Wuhan
97	80	male			9/1/2020	9/1/2020	120	62	female			Cangzhou	25/01/2020	25/01/2020	Non-household	Cangzhou Municipal Health Commission	https://weibo.com/cangzhounews	Du			Wuhan
148	28	female			28/01/2020	28/01/2020	154	67	male			Tangshan	28/01/2020	28/01/2020	Non-household	Tangshan Municipal Health Commission	http://wsjkwyh.tangshan.gov.cn/	Du			Tangshan
154	67	male			28/01/2020	28/01/2020	155	32	male			Tangshan	4/2/2020	4/2/2020	Non-household	Tangshan Municipal Health Commission	http://wsjkwyh.tangshan.gov.cn/	Du			Tangshan
154	67	male			28/01/2020	28/01/2020	157	71	female			Tangshan	2/2/2020	2/2/2020	Non-household	Tangshan Municipal Health Commission	http://wsjkwyh.tangshan.gov.cn/	Du			Tangshan
154	67	male			28/01/2020	28/01/2020	163	45	male			Tangshan	9/2/2020	9/2/2020	Non-household	Tangshan Municipal Health Commission	http://wsjkwyh.tangshan.gov.cn/	Du			Tangshan
183	42	male			24/01/2020	24/01/2020	184	67	male			Shijiazhuang	30/01/2020	30/01/2020	No information	Shijiazhuang Municipal Health Commission	http://wsjk.sjz.gov.cn	Du			Guangzhou
201		female			2/2/2020	2/2/2020	202		male			Chengde	3/2/2020	3/2/2020	Non-household	Chengde Municipal Health Commission	http://wjw.chengde.gov.cn/	Du			Xiaogan
211	59	male			28/01/2020	28/01/2020	220	34	female			Xingtai	1/2/2020	1/2/2020	Household	Xingtai Municipal Health Commission	http://wsjkw.xingtai.gov.cn	Du			Wuhan
227	27	male			23/01/2020	23/01/2020	229	50	female			Qinhuangdao	3/2/2020	3/2/2020	Non-household	Qinhuangdao Municipal Health Commission	http://wjw.qhd.gov.cn/	Du			Beijing
271	57	female			12/1/2020	12/1/2020	275	33	female			Langfang	29/01/2020	29/01/2020	Non-household	Langfang Municipal Health Commission	http://wjw.lf.gov.cn/html/index.html	Du			Wuhan
267	21	male			23/01/2020	23/01/2020	277	35	male			Langfang	2/2/2020	2/2/2020	Non-household	Langfang Municipal Health Commission	http://wjw.lf.gov.cn/html/index.html	Du			Wuhan
267	21	male			23/01/2020	23/01/2020	280	35	male			Langfang	7/2/2020	7/2/2020	Non-household	Langfang Municipal Health Commission	http://wjw.lf.gov.cn/html/index.html	Du			Wuhan
284	30	male			27/01/2020	27/01/2020	286	53	female			Langfang	7/2/2020	7/2/2020	Non-household	Langfang Municipal Health Commission	http://wjw.lf.gov.cn/html/index.html	Du			Langfang
448	22	female			31/01/2020	31/01/2020	457	47	male			Chengdu	28/01/2020	28/01/2020	Household	Chengdu Municipal Health Commission	http://cdwjw.chengdu.gov.cn/cdwjw/c135632/yqbd.shtml	Du			Chengdu
470	31	female			2/2/2020	2/2/2020	471	9	male			Chengdu	2/2/2020	2/2/2020	No information	Chengdu Municipal Health Commission	http://cdwjw.chengdu.gov.cn/cdwjw/c135632/yqbd.shtml	Du			Hubei
479	43	female			28/01/2020	28/01/2020	480	64	female			Chengdu	28/01/2020	28/01/2020	No information	Chengdu Municipal Health Commission	http://cdwjw.chengdu.gov.cn/cdwjw/c135632/yqbd.shtml	Du			No information
465	47	male			31/01/2020	31/01/2020	483	47	female			Chengdu	4/2/2020	4/2/2020	No information	Chengdu Municipal Health Commission	http://cdwjw.chengdu.gov.cn/cdwjw/c135632/yqbd.shtml	Du			Wuhan
500	55	male			23/01/2020	23/01/2020	499	54	female			Chengdu	30/01/2020	30/01/2020	Household	Chengdu Municipal Health Commission	http://cdwjw.chengdu.gov.cn/cdwjw/c135632/yqbd.shtml	Du			Chengdu
521	34	male			31/01/2020	31/01/2020	527	28	female			Bazhong	4/2/2020	4/2/2020	No information	Bazhong Municipal Health Commission	http://wsjkw.cnbz.gov.cn/index.html	Du			Wuhan
521	34	male			31/01/2020	31/01/2020	528	60	female			Bazhong	4/2/2020	4/2/2020	No information	Bazhong Municipal Health Commission	http://wsjkw.cnbz.gov.cn/index.html	Du			Wuhan
521	34	male			31/01/2020	31/01/2020	529	4	male			Bazhong	4/2/2020	4/2/2020	No information	Bazhong Municipal Health Commission	http://wsjkw.cnbz.gov.cn/index.html	Du			Wuhan
521	34	male			31/01/2020	31/01/2020	530	2	male			Bazhong	4/2/2020	4/2/2020	No information	Bazhong Municipal Health Commission	http://wsjkw.cnbz.gov.cn/index.html	Du			Wuhan
514	52	female			26/01/2020	26/01/2020	531	19	male			Bazhong	2/2/2020	2/2/2020	No information	Bazhong Municipal Health Commission	http://wsjkw.cnbz.gov.cn/index.html	Du			Wuhan
525	45	male			29/01/2020	29/01/2020	532	53	female			Bazhong	1/2/2020	1/2/2020	Non-household	Bazhong Municipal Health Commission	http://wsjkw.cnbz.gov.cn/index.html	Du			Wuhan
559	47	female			27/01/2020	27/01/2020	563	47	male			Deyang	29/01/2020	29/01/2020	Household	Deyang Municipal Health Commission	https://wjw.deyang.gov.cn/	Du			Wuhan
559	47	female			27/01/2020	27/01/2020	564	44	female			Deyang	29/01/2020	29/01/2020	Household	Deyang Municipal Health Commission	https://wjw.deyang.gov.cn/	Du			Wuhan
560	53	male			28/01/2020	28/01/2020	565	45	male			Deyang	30/01/2020	30/01/2020	Non-household	Deyang Municipal Health Commission	https://wjw.deyang.gov.cn/	Du			Wuhan
559	47	female			27/01/2020	27/01/2020	566	66	female			Deyang	30/01/2020	30/01/2020	Household	Deyang Municipal Health Commission	https://wjw.deyang.gov.cn/	Du			Wuhan
560	53	male			28/01/2020	28/01/2020	568	44	male			Deyang	30/01/2020	30/01/2020	No information	Deyang Municipal Health Commission	https://wjw.deyang.gov.cn/	Du			Wuhan
567	29	female			30/01/2020	30/01/2020	570	31	male			Deyang	7/2/2020	7/2/2020	Household	Deyang Municipal Health Commission	https://wjw.deyang.gov.cn/	Du			Jingzhou, Hubei Province
559	47	female			27/01/2020	27/01/2020	571	45	male			Deyang	2/2/2020	2/2/2020	Household	Deyang Municipal Health Commission	https://wjw.deyang.gov.cn/	Du			Wuhan
578	51	male			1/2/2020	1/2/2020	581	49	male			Ganzi	2/2/2020	2/2/2020	No information	Ganzi Tibetan Autonomous Prefecture Health Commission	http://wjw.gzz.gov.cn/	Du			Chengdu
574	25	female			23/01/2020	23/01/2020	582	28	female			Ganzi	3/2/2020	3/2/2020	No information	Ganzi Tibetan Autonomous Prefecture Health Commission	http://wjw.gzz.gov.cn/	Du			Wuhan
610	49	female			3/2/2020	3/2/2020	611	45	male			Guang'an	5/2/2020	5/2/2020	No information	Guang'an Municipal Health Commission	http://wjw.guang-an.gov.cn/	Du			No information
610	49	female			3/2/2020	3/2/2020	612	21	male			Guang'an	5/2/2020	5/2/2020	No information	Guang'an Municipal Health Commission	http://wjw.guang-an.gov.cn/	Du			No information
623	32	male			25/01/2020	25/01/2020	624	49	female			Leshan	5/2/2020	5/2/2020	Household	Leshan Municipal Health Commission	http://swjj.leshan.gov.cn	Du			Wuhan
625	28	female			23/01/2020	23/01/2020	626	32	male			Liangshan	24/01/2020	24/01/2020	No information	Liangshan Municipal Health Commission	http://wjw.lsz.gov.cn/	Du			Wuhan
635	31	male			25/01/2020	25/01/2020	636	24	female			Luzhou	25/01/2020	25/01/2020	No information	Official Weibo of Information Office of Luzhou municipal People's government	https://weibo.com/luzhouzhengwu	Du			Wuhan
654	50	female			25/01/2020	25/01/2020	653	57	male			Luzhou	27/01/2020	27/01/2020	Household	Official Weibo of Information Office of Luzhou municipal People's government	https://weibo.com/luzhouzhengwu	Du			Luzhou
655	56	female			26/01/2020	26/01/2020	656	63	male			Luzhou	26/01/2020	26/01/2020	Household	Official Weibo of Information Office of Luzhou municipal People's government	https://weibo.com/luzhouzhengwu	Du			No information
696	47	male			30/01/2020	30/01/2020	703	67	female			Nanchong	1/2/2020	1/2/2020	No information	Nanchong Municipal Health Commission	http://wsjsw.nanchong.gov.cn	Du			No information
686	59	male			29/01/2020	29/01/2020	704	35	female			Nanchong	2/2/2020	2/2/2020	Non-household	Nanchong Municipal Health Commission	http://wsjsw.nanchong.gov.cn	Du			No information
707	44	female			23/01/2020	23/01/2020	708	47	male			Neijiang	23/01/2020	23/01/2020	No information	Neijiang Municipal Health Commission	http://wsj.neijiang.gov.cn/	Du			Wuhan
707	44	female			23/01/2020	23/01/2020	709	16	male			Neijiang	23/01/2020	23/01/2020	No information	Neijiang Municipal Health Commission	http://wsj.neijiang.gov.cn/	Du			Wuhan
712	36	male			29/01/2020	29/01/2020	717	33	male			Neijiang	30/01/2020	30/01/2020	Non-household	Neijiang Municipal Health Commission	http://wsj.neijiang.gov.cn/	Du			Wuhan
707	44	female			23/01/2020	23/01/2020	723	45	male			Neijiang	6/2/2020	6/2/2020	Household	Neijiang Municipal Health Commission	http://wsj.neijiang.gov.cn/	Du			Wuhan
725	49	male			29/01/2020	29/01/2020	726	48	female			Panzhihua	29/01/2020	29/01/2020	No information	Panzhihua Municipal Health Commission	http://wjw.panzhihua.gov.cn/	Du			No information
725	49	male			29/01/2020	29/01/2020	727	50	female			Panzhihua	29/01/2020	29/01/2020	No information	Panzhihua Municipal Health Commission	http://wjw.panzhihua.gov.cn/	Du			No information
725	49	male			29/01/2020	29/01/2020	728	24	male			Panzhihua	29/01/2020	29/01/2020	No information	Panzhihua Municipal Health Commission	http://wjw.panzhihua.gov.cn/	Du			No information
725	49	male			29/01/2020	29/01/2020	729	46	male			Panzhihua	29/01/2020	29/01/2020	No information	Panzhihua Municipal Health Commission	http://wjw.panzhihua.gov.cn/	Du			No information
725	49	male			29/01/2020	29/01/2020	730	18	male			Panzhihua	29/01/2020	29/01/2020	No information	Panzhihua Municipal Health Commission	http://wjw.panzhihua.gov.cn/	Du			No information
725	49	male			29/01/2020	29/01/2020	732	54	male			Panzhihua	31/01/2020	31/01/2020	Non-household	Panzhihua Municipal Health Commission	http://wjw.panzhihua.gov.cn/	Du			No information
732	54	male			31/01/2020	31/01/2020	733	22	male			Panzhihua	30/01/2020	30/01/2020	Non-household	Panzhihua Municipal Health Commission	http://wjw.panzhihua.gov.cn/	Du			Panzhihua
725	49	male			29/01/2020	29/01/2020	734	78	female			Panzhihua	3/2/2020	3/2/2020	Non-household	Panzhihua Municipal Health Commission	http://wjw.panzhihua.gov.cn/	Du			No information
725	49	male			29/01/2020	29/01/2020	735	48				Panzhihua	7/2/2020	7/2/2020	Non-household	Panzhihua Municipal Health Commission	http://wjw.panzhihua.gov.cn/	Du			No information
741	35	male			13/01/2020	13/01/2020	740	31	male			Suining	28/01/2020	28/01/2020	No information	Suining Municipal Health Commission	http://swjw.suining.gov.cn/home	Du			Wuhan
787	48	male			26/01/2020	26/01/2020	786	49	female			Fuyang	27/01/2020	27/01/2020	No information	Fuyang Municipal Health Commission	http://wjw.fy.gov.cn/	Du			Wuhan
776	21	female			18/01/2020	18/01/2020	788	27	female			Fuyang	29/01/2020	29/01/2020	Household	Fuyang Municipal Health Commission	http://wjw.fy.gov.cn/	Du			Wuhan
784	44	male			20/01/2020	20/01/2020	797	45	female			Fuyang	26/01/2020	26/01/2020	Household	Fuyang Municipal Health Commission	http://wjw.fy.gov.cn/	Du			Fuyang
784	44	male			20/01/2020	20/01/2020	798	20	female			Fuyang	25/01/2020	25/01/2020	Household	Fuyang Municipal Health Commission	http://wjw.fy.gov.cn/	Du			Fuyang
787	48	male			26/01/2020	26/01/2020	808	21	female			Fuyang	30/01/2020	30/01/2020	Household	Fuyang Municipal Health Commission	http://wjw.fy.gov.cn/	Du			Wuhan
801	31	female			20/01/2020	20/01/2020	816	30	male			Fuyang	26/01/2020	26/01/2020	Household	Fuyang Municipal Health Commission	http://wjw.fy.gov.cn/	Du			Wuhan
800	47	male			28/01/2020	28/01/2020	821	41	female			Fuyang	1/2/2020	1/2/2020	No information	Fuyang Municipal Health Commission	http://wjw.fy.gov.cn/	Du			Wuhan
800	47	male			28/01/2020	28/01/2020	822	1	female			Fuyang	1/2/2020	1/2/2020	Household	Fuyang Municipal Health Commission	http://wjw.fy.gov.cn/	Du			Wuhan
797	45	female			26/01/2020	26/01/2020	829	55	male			Fuyang	28/01/2020	28/01/2020	Non-household	Fuyang Municipal Health Commission	http://wjw.fy.gov.cn/	Du			Fuyang
830	68	female			23/01/2020	23/01/2020	831	67	male			Fuyang	25/01/2020	25/01/2020	Non-household	Fuyang Municipal Health Commission	http://wjw.fy.gov.cn/	Du			Fuyang
784	44	male			20/01/2020	20/01/2020	840	25	male			Fuyang	31/01/2020	31/01/2020	Non-household	Fuyang Municipal Health Commission	http://wjw.fy.gov.cn/	Du			Fuyang
839	47	male			28/01/2020	28/01/2020	846	46	female			Fuyang	27/01/2020	27/01/2020	Household	Fuyang Municipal Health Commission	http://wjw.fy.gov.cn/	Du			Wuhan
823	49	male			28/01/2020	28/01/2020	850	47	female			Fuyang	6/2/2020	6/2/2020	Non-household	Fuyang Municipal Health Commission	http://wjw.fy.gov.cn/	Du			Xiao Shan
857	50	female			10/1/2020	10/1/2020	859	40	female			Hefei	15/01/2020	15/01/2020	Non-household	Hefei Municipal Health Commission	http://wjw.hefei.gov.cn/	Du			Wuhan
857	50	female			10/1/2020	10/1/2020	860	51	male			Hefei	17/01/2020	17/01/2020	Non-household	Hefei Municipal Health Commission	http://wjw.hefei.gov.cn/	Du			Wuhan
859	40	female			15/01/2020	15/01/2020	868	40	male			Hefei	24/01/2020	24/01/2020	No information	Hefei Municipal Health Commission	http://wjw.hefei.gov.cn/	Du			Hefei
869	22	male			22/01/2020	22/01/2020	870	22	male			Hefei	24/01/2020	24/01/2020	Non-household	Hefei Municipal Health Commission	http://wjw.hefei.gov.cn/	Du			Wuhan
869	22	male			22/01/2020	22/01/2020	871	22	male			Hefei	25/01/2020	25/01/2020	Non-household	Hefei Municipal Health Commission	http://wjw.hefei.gov.cn/	Du			Wuhan
869	22	male			22/01/2020	22/01/2020	872	22	male			Hefei	24/01/2020	24/01/2020	Non-household	Hefei Municipal Health Commission	http://wjw.hefei.gov.cn/	Du			Wuhan
869	22	male			22/01/2020	22/01/2020	873	24	male			Hefei	22/01/2020	22/01/2020	Non-household	Hefei Municipal Health Commission	http://wjw.hefei.gov.cn/	Du			Wuhan
899	28	male			28/01/2020	28/01/2020	898	27	female			Hefei	27/01/2020	27/01/2020	No information	Hefei Municipal Health Commission	http://wjw.hefei.gov.cn/	Du			Wuhan
882	56	female			18/01/2020	18/01/2020	927	57	male			Hefei	19/01/2020	19/01/2020	Non-household	Hefei Municipal Health Commission	http://wjw.hefei.gov.cn/	Du			Wuhan
978	52	male			27/01/2020	27/01/2020	948	43	female			Hefei	3/2/2020	3/2/2020	Non-household	Hefei Municipal Health Commission	http://wjw.hefei.gov.cn/	Du			Hefei
944	29	male			27/01/2020	27/01/2020	980	55	male			Hefei	6/2/2020	6/2/2020	No information	Hefei Municipal Health Commission	http://wjw.hefei.gov.cn/	Du			No information
986	73	female			22/01/2020	22/01/2020	985	78	male			Hefei	31/01/2020	31/01/2020	Non-household	Hefei Municipal Health Commission	http://wjw.hefei.gov.cn/	Du			Hefei
1001	27	male			28/01/2020	28/01/2020	1000	57	female			Huaibei	28/01/2020	28/01/2020	Non-household	Huaibei Municipal Health Commission	http://wjw.huaibei.gov.cn/xxfb/tzgg/index.html	Du			Suzhou
994	45	female			9/1/2020	9/1/2020	1003	28	female			Huaibei	26/01/2020	26/01/2020	Non-household	Huaibei Municipal Health Commission	http://wjw.huaibei.gov.cn/xxfb/tzgg/index.html	Du			Wuhan
1012	59	female			19/01/2020	19/01/2020	1014	62	male			Huainan	22/01/2020	22/01/2020	Non-household	Huainan Municipal Health Commission	http://wjw.huainan.gov.cn/xwzx/tzgg/index.html	Du			Wuhan
1047	34	male			25/01/2020	25/01/2020	1059	57	female			Lu'an	28/01/2020	28/01/2020	Non-household	Lu'an Municipal People's Government	http://www.luan.gov.cn/zwzx/jrla/zxyw/index.html	Du			Suzhou
1062	41	male			27/01/2020	27/01/2020	1063	41	female			Lu'an	30/01/2020	30/01/2020	Non-household	Lu'an Municipal People's Government	http://www.luan.gov.cn/zwzx/jrla/zxyw/index.html	Du			Lu'an
1064	37	male			29/01/2020	29/01/2020	1065	33	female			Lu'an	2/2/2020	2/2/2020	Household	Lu'an Municipal People's Government	http://www.luan.gov.cn/zwzx/jrla/zxyw/index.html	Du			Shanghai
1044	45	male			22/01/2020	22/01/2020	1066	65	female			Lu'an	1/2/2020	1/2/2020	Non-household	Lu'an Municipal People's Government	http://www.luan.gov.cn/zwzx/jrla/zxyw/index.html	Du			Bengbu
1035	38	male			18/01/2020	18/01/2020	1067	37	female			Lu'an	2/2/2020	2/2/2020	Household	Lu'an Municipal People's Government	http://www.luan.gov.cn/zwzx/jrla/zxyw/index.html	Du			Wuhan
1074	22	male			22/01/2020	22/01/2020	1068	70	male			Lu'an	4/2/2020	4/2/2020	Household	Lu'an Municipal People's Government	http://www.luan.gov.cn/zwzx/jrla/zxyw/index.html	Du			Wuhan
1047	34	male			25/01/2020	25/01/2020	1069	26	male			Lu'an	2/2/2020	2/2/2020	Household	Lu'an Municipal People's Government	http://www.luan.gov.cn/zwzx/jrla/zxyw/index.html	Du			Suzhou
1048	37	male			25/01/2020	25/01/2020	1070	64	male			Lu'an	31/01/2020	31/01/2020	Non-household	Lu'an Municipal People's Government	http://www.luan.gov.cn/zwzx/jrla/zxyw/index.html	Du			Lu'an
1047	34	male			25/01/2020	25/01/2020	1071	57	male			Lu'an	4/2/2020	4/2/2020	Non-household	Lu'an Municipal People's Government	http://www.luan.gov.cn/zwzx/jrla/zxyw/index.html	Du			Suzhou
1051	45	male			28/01/2020	28/01/2020	1073	41	female			Lu'an	2/2/2020	2/2/2020	Household	Lu'an Municipal People's Government	http://www.luan.gov.cn/zwzx/jrla/zxyw/index.html	Du			Wuhan
1064	37	male			29/01/2020	29/01/2020	1077	61	female			Lu'an	5/2/2020	5/2/2020	Non-household	Lu'an Municipal People's Government	http://www.luan.gov.cn/zwzx/jrla/zxyw/index.html	Du			Shanghai
1074	22	male			22/01/2020	22/01/2020	1079	42	male			Lu'an	6/2/2020	6/2/2020	Non-household	Lu'an Municipal People's Government	http://www.luan.gov.cn/zwzx/jrla/zxyw/index.html	Du			Wuhan
1067	37	female			2/2/2020	2/2/2020	1083	42	male			Lu'an	5/2/2020	5/2/2020	Household	Lu'an Municipal People's Government	http://www.luan.gov.cn/zwzx/jrla/zxyw/index.html	Du			Lu'an
1067	37	female			2/2/2020	2/2/2020	1084	3	male			Lu'an	6/2/2020	6/2/2020	Household	Lu'an Municipal People's Government	http://www.luan.gov.cn/zwzx/jrla/zxyw/index.html	Du			Lu'an
1074	22	male			22/01/2020	22/01/2020	1086	42	male			Lu'an	6/2/2020	6/2/2020	Household	Lu'an Municipal People's Government	http://www.luan.gov.cn/zwzx/jrla/zxyw/index.html	Du			Wuhan
1062	41	male			27/01/2020	27/01/2020	1087	29	male			Lu'an	7/2/2020	7/2/2020	Household	Lu'an Municipal People's Government	http://www.luan.gov.cn/zwzx/jrla/zxyw/index.html	Du			Lu'an
1167	25	male			23/01/2020	23/01/2020	1168	50	female			Anqing	24/01/2020	24/01/2020	Non-household	Anqing Municipal Health Commission	http://wjw.anqing.gov.cn/	Du			Wuhan
1167	25	male			23/01/2020	23/01/2020	1169	53	male			Anqing	26/01/2020	26/01/2020	Non-household	Anqing Municipal Health Commission	http://wjw.anqing.gov.cn/	Du			Wuhan
1205	57	male			27/01/2020	27/01/2020	1206	55	female			Anqing	30/01/2020	30/01/2020	Non-household	Anqing Municipal Health Commission	http://wjw.anqing.gov.cn/	Du			Anqing
1205	57	male			27/01/2020	27/01/2020	1207	54	male			Anqing	1/2/2020	1/2/2020	Non-household	Anqing Municipal Health Commission	http://wjw.anqing.gov.cn/	Du			Anqing
1204	53	female			3/2/2020	3/2/2020	1210	57	male			Anqing	4/2/2020	4/2/2020	Non-household	Anqing Municipal Health Commission	http://wjw.anqing.gov.cn/	Du			Wuhan
1204	53	female			3/2/2020	3/2/2020	1214	54	female			Anqing	2/2/2020	2/2/2020	Household	Anqing Municipal Health Commission	http://wjw.anqing.gov.cn/	Du			Wuhan
1270	71	male			25/01/2020	25/01/2020	1271	70	female			Bozhou	26/01/2020	26/01/2020	Non-household	Bozhou Municipal Health Commission	http://wjw.bozhou.gov.cn/	Du			Wuhan
1264	25	female			21/01/2020	21/01/2020	1281	22	male			Bozhou	28/01/2020	28/01/2020	Non-household	Bozhou Municipal Health Commission	http://wjw.bozhou.gov.cn/	Du			Wuhan
1270	71	male			25/01/2020	25/01/2020	1292	37	female			Bozhou	26/01/2020	26/01/2020	Non-household	Bozhou Municipal Health Commission	http://wjw.bozhou.gov.cn/	Du			Wuhan
1273	48	male			26/01/2020	26/01/2020	1297	47	male			Bozhou	23/01/2020	23/01/2020	Non-household	Bozhou Municipal Health Commission	http://wjw.bozhou.gov.cn/	Du			Bozhou
1266	40	female			21/01/2020	21/01/2020	1305	25	male			Bozhou	26/01/2020	26/01/2020	Non-household	Bozhou Municipal Health Commission	http://wjw.bozhou.gov.cn/	Du			Wuhan
1313	50	male			30/01/2020	30/01/2020	1318	26	male			Bozhou	3/2/2020	3/2/2020	Household	Bozhou Municipal Health Commission	http://wjw.bozhou.gov.cn/	Du			Bozhou
1326	48	male			2/2/2020	2/2/2020	1331	42	female			Bozhou	1/2/2020	1/2/2020	Household	Bozhou Municipal Health Commission	http://wjw.bozhou.gov.cn/	Du			Bozhou
1288	42	female			28/01/2020	28/01/2020	1332	38	male			Bozhou	27/01/2020	27/01/2020	Non-household	Bozhou Municipal Health Commission	http://wjw.bozhou.gov.cn/	Du			Bozhou
1270	71	male			25/01/2020	25/01/2020	1333	43	male			Bozhou	2/2/2020	2/2/2020	Non-household	Bozhou Municipal Health Commission	http://wjw.bozhou.gov.cn/	Du			Wuhan
1284	47	male			29/01/2020	29/01/2020	1336	56	male			Bozhou	31/01/2020	31/01/2020	Non-household	Bozhou Municipal Health Commission	http://wjw.bozhou.gov.cn/	Du			Bozhou
1284	47	male			29/01/2020	29/01/2020	1342	21	male			Bozhou	3/2/2020	3/2/2020	Non-household	Bozhou Municipal Health Commission	http://wjw.bozhou.gov.cn/	Du			Bozhou
1288	42	female			28/01/2020	28/01/2020	1344	35	female			Bozhou	27/01/2020	27/01/2020	Non-household	Bozhou Municipal Health Commission	http://wjw.bozhou.gov.cn/	Du			Bozhou
1377	49	male			12/1/2020	12/1/2020	1378	46	female			Suzhou	15/01/2020	15/01/2020	Non-household	Suzhou Municipal Health Commission	http://wjw.ahsz.gov.cn/	Du			Wuhan
1386	38	male			1/2/2020	1/2/2020	1390	38	female			Suzhou	1/2/2020	1/2/2020	Non-household	Suzhou Municipal Health Commission	http://wjw.ahsz.gov.cn/	Du			Wuhan
1386	38	male			1/2/2020	1/2/2020	1391	39	female			Suzhou	5/2/2020	5/2/2020	No information	Suzhou Municipal Health Commission	http://wjw.ahsz.gov.cn/	Du			Wuhan
1439	32	male			19/01/2020	19/01/2020	1452	59	female			Jinan	30/01/2020	30/01/2020	No information	Jinan Municipal Health Commission	http://jnmhc.jinan.gov.cn/col/col50360/index.html	Du			Wuhan
1462	49	female			23/01/2020	23/01/2020	1463	22	female			Jinan	26/01/2020	26/01/2020	Non-household	Jinan Municipal Health Commission	http://jnmhc.jinan.gov.cn/col/col50360/index.html	Du			Jinan
1461	39	female			23/01/2020	23/01/2020	1472	66	female			Jinan	27/01/2020	27/01/2020	No information	Jinan Municipal Health Commission	http://jnmhc.jinan.gov.cn/col/col50360/index.html	Du			Jinan
1496	28	male			25/01/2020	25/01/2020	1515	43	female			Qingdao	4/2/2020	4/2/2020	Non-household	Qingdao Municipal Health Commission	http://wsjsw.qingdao.gov.cn/	Du			Qingdao
1612	48	male			25/01/2020	25/01/2020	1613	44	female			Jining	28/01/2020	28/01/2020	No information	Jining Municipal Health Commission	http://wjw.jining.gov.cn/	Du			Beijing
1612	48	male			25/01/2020	25/01/2020	1614	38	female			Jining	29/01/2020	29/01/2020	No information	Jining Municipal Health Commission	http://wjw.jining.gov.cn/	Du			Beijing
1647	32	male			26/01/2020	26/01/2020	1651	53	female			Liaocheng	27/01/2020	27/01/2020	No information	Liaocheng Municipal Health Commission	http://wjw.liaocheng.gov.cn/	Du			Wuhan
1648	40	male			27/01/2020	27/01/2020	1653	46	female			Liaocheng	27/01/2020	27/01/2020	Household	Liaocheng Municipal Health Commission	http://wjw.liaocheng.gov.cn/	Du			Liaocheng
1648	40	male			27/01/2020	27/01/2020	1654	40	male			Liaocheng	29/01/2020	29/01/2020	Non-household	Liaocheng Municipal Health Commission	http://wjw.liaocheng.gov.cn/	Du			Liaocheng
1648	40	male			27/01/2020	27/01/2020	1659	65	female			Liaocheng	31/01/2020	31/01/2020	No information	Liaocheng Municipal Health Commission	http://wjw.liaocheng.gov.cn/	Du			Liaocheng
1648	40	male			27/01/2020	27/01/2020	1660	19	male			Liaocheng	29/01/2020	29/01/2020	No information	Liaocheng Municipal Health Commission	http://wjw.liaocheng.gov.cn/	Du			Liaocheng
1648	40	male			27/01/2020	27/01/2020	1661	10	male			Liaocheng	29/01/2020	29/01/2020	Household	Liaocheng Municipal Health Commission	http://wjw.liaocheng.gov.cn/	Du			Liaocheng
1648	40	male			27/01/2020	27/01/2020	1662	43	male			Liaocheng	31/01/2020	31/01/2020	Household	Liaocheng Municipal Health Commission	http://wjw.liaocheng.gov.cn/	Du			Liaocheng
1648	40	male			27/01/2020	27/01/2020	1664	49	female			Liaocheng	31/01/2020	31/01/2020	Household	Liaocheng Municipal Health Commission	http://wjw.liaocheng.gov.cn/	Du			Liaocheng
1648	40	male			27/01/2020	27/01/2020	1665	49	male			Liaocheng	5/2/2020	5/2/2020	Non-household	Liaocheng Municipal Health Commission	http://wjw.liaocheng.gov.cn/	Du			Liaocheng
1648	40	male			27/01/2020	27/01/2020	1667	41	female			Liaocheng	22/01/2020	22/01/2020	Household	Liaocheng Municipal Health Commission	http://wjw.liaocheng.gov.cn/	Du			Liaocheng
1648	40	male			27/01/2020	27/01/2020	1669	73	female			Liaocheng	24/01/2020	24/01/2020	Non-household	Liaocheng Municipal Health Commission	http://wjw.liaocheng.gov.cn/	Du			Liaocheng
1648	40	male			27/01/2020	27/01/2020	1670	62	male			Liaocheng	27/01/2020	27/01/2020	Non-household	Liaocheng Municipal Health Commission	http://wjw.liaocheng.gov.cn/	Du			Liaocheng
1648	40	male			27/01/2020	27/01/2020	1671	67	female			Liaocheng	27/01/2020	27/01/2020	Household	Liaocheng Municipal Health Commission	http://wjw.liaocheng.gov.cn/	Du			Liaocheng
1648	40	male			27/01/2020	27/01/2020	1672	46	male			Liaocheng	2/2/2020	2/2/2020	Household	Liaocheng Municipal Health Commission	http://wjw.liaocheng.gov.cn/	Du			Liaocheng
1648	40	male			27/01/2020	27/01/2020	1673	68	female			Liaocheng	31/01/2020	31/01/2020	Household	Liaocheng Municipal Health Commission	http://wjw.liaocheng.gov.cn/	Du			Liaocheng
1648	40	male			27/01/2020	27/01/2020	1674	72	male			Liaocheng	2/2/2020	2/2/2020	Household	Liaocheng Municipal Health Commission	http://wjw.liaocheng.gov.cn/	Du			Liaocheng
1648	40	male			27/01/2020	27/01/2020	1675	62	female			Liaocheng	30/01/2020	30/01/2020	Household	Liaocheng Municipal Health Commission	http://wjw.liaocheng.gov.cn/	Du			Liaocheng
1684	41	male			19/01/2020	19/01/2020	1685	38	female			Linyi	25/01/2020	25/01/2020	No information	Linyi Municipal Health Commission	http://wsjsw.linyi.gov.cn/	Du			Wuhan
1691	51	male			21/01/2020	21/01/2020	1699	47	female			Linyi	24/01/2020	24/01/2020	Non-household	Linyi Municipal Health Commission	http://wsjsw.linyi.gov.cn/	Du			Linyi
1718	57	male			23/01/2020	23/01/2020	1725	64	male			sunshine	29/01/2020	29/01/2020	No information	Rizhao Municipal Health Commission	http://wsjkw.rizhao.gov.cn/	Du			Wuhan
1718	57	male			23/01/2020	23/01/2020	1727	56	female			sunshine	1/2/2020	1/2/2020	Non-household	Rizhao Municipal Health Commission	http://wsjkw.rizhao.gov.cn/	Du			Wuhan
1734	88	female			24/01/2020	24/01/2020	1737	67	male			Taian	23/01/2020	23/01/2020	No information	Taian Municipal Health Commission	http://wjw.taian.gov.cn/	Du			Taian
1739	32	male			27/01/2020	27/01/2020	1740	20	male			Taian	27/01/2020	27/01/2020	No information	Taian Municipal Health Commission	http://wjw.taian.gov.cn/	Du			Wuhan
1755	39	male			26/01/2020	26/01/2020	1760	66	male			Weihai	25/01/2020	25/01/2020	Household	Weihai Municipal Health Commission	http://wsjkw.weihai.gov.cn/	Du			No information
1761	51	male			23/01/2020	23/01/2020	1763	53	male			Weihai	24/01/2020	24/01/2020	Non-household	Weihai Municipal Health Commission	http://wsjkw.weihai.gov.cn/	Du			Weihai
1755	39	male			26/01/2020	26/01/2020	1764	66	female			Weihai	27/01/2020	27/01/2020	Household	Weihai Municipal Health Commission	http://wsjkw.weihai.gov.cn/	Du			No information
1755	39	male			26/01/2020	26/01/2020	1771	3	male			Weihai	2/2/2020	2/2/2020	Non-household	Weihai Municipal Health Commission	http://wsjkw.weihai.gov.cn/	Du			No information
1759	31	male			26/01/2020	26/01/2020	1772	56	male			Weihai	28/01/2020	28/01/2020	Household	Weihai Municipal Health Commission	http://wsjkw.weihai.gov.cn/	Du			Wuhan
1766	46	female			25/01/2020	25/01/2020	1773	86	male			Weihai	29/01/2020	29/01/2020	Household	Weihai Municipal Health Commission	http://wsjkw.weihai.gov.cn/	Du			Wuhan
1761	51	male			23/01/2020	23/01/2020	1777	50	female			Weihai	28/01/2020	28/01/2020	No information	Weihai Municipal Health Commission	http://wsjkw.weihai.gov.cn/	Du			Weihai
1790	45	male			21/01/2020	21/01/2020	1791	33	male			Weifang	20/01/2020	20/01/2020	No information	Weifang Municipal Health Commission	http://wsjkw.weifang.gov.cn/	Du			No information
1790	45	male			21/01/2020	21/01/2020	1792	31	female			Weifang	24/01/2020	24/01/2020	No information	Weifang Municipal Health Commission	http://wsjkw.weifang.gov.cn/	Du			No information
1790	45	male			21/01/2020	21/01/2020	1797	62	female			Weifang	2/2/2020	2/2/2020	Non-household	Weifang Municipal Health Commission	http://wsjkw.weifang.gov.cn/	Du			No information
1790	45	male			21/01/2020	21/01/2020	1798	48	male			Weifang	25/01/2020	25/01/2020	Non-household	Weifang Municipal Health Commission	http://wsjkw.weifang.gov.cn/	Du			No information
1818	34	male			22/01/2020	22/01/2020	1819	37	female			Zaozhuang	27/01/2020	27/01/2020	No information	Zaozhuang Municipal Health Commission	http://wsjkw.zaozhuang.gov.cn/	Du			Wuhan
1818	34	male			22/01/2020	22/01/2020	1820	60	female			Zaozhuang	27/01/2020	27/01/2020	No information	Zaozhuang Municipal Health Commission	http://wsjkw.zaozhuang.gov.cn/	Du			Wuhan
1906	41	female			26/01/2020	26/01/2020	1904	9	female			Dongguan	29/01/2020	29/01/2020	No information	Dongguan Municipal Health Bureau	http://dghb.dg.gov.cn/	Du			Xiaogan
1917	53	male			30/01/2020	30/01/2020	1918	53	male			Maoming	2/2/2020	2/2/2020	No information	Official Weibo of Information Office of Maoming municipal People's government	https://weibo.com/238076780	Du			Suizhou City, Hubei Province
1980	36	male			20/01/2020	20/01/2020	1981	38	female			Zhuhai	20/01/2020	20/01/2020	Non-household	Offical Weibo of Zhuhai municipal Health Bureau	https://weibo.com/u/3603732332	Du			Wuhan
2011	37	female			26/01/2020	26/01/2020	2012	67	female			Zhuhai	26/01/2020	26/01/2020	No information	Offical Weibo of Zhuhai municipal Health Bureau	https://weibo.com/u/3603732332	Du			Wuhan
2054	62	male			11/1/2020	11/1/2020	2063	62	female			Shenzhen	20/01/2020	20/01/2020	Household	Shenzhen Municipal Health Commission	http://wjw.sz.gov.cn/	Du			Wuhan
2069	57	male			19/01/2020	19/01/2020	2085	54	female			Shenzhen	20/01/2020	20/01/2020	No information	Shenzhen Municipal Health Commission	http://wjw.sz.gov.cn/	Du			Wuhan
2067	73	male			20/01/2020	20/01/2020	2115	49	male			Shenzhen	24/01/2020	24/01/2020	Non-household	Shenzhen Municipal Health Commission	http://wjw.sz.gov.cn/	Du			Wuhan
2067	73	male			20/01/2020	20/01/2020	2116	49	female			Shenzhen	22/01/2020	22/01/2020	No information	Shenzhen Municipal Health Commission	http://wjw.sz.gov.cn/	Du			Wuhan
2076	49	female			21/01/2020	21/01/2020	2127	26	female			Shenzhen	21/01/2020	21/01/2020	No information	Shenzhen Municipal Health Commission	http://wjw.sz.gov.cn/	Du			Wuhan
2141	65	male			23/01/2020	23/01/2020	2142	38	female			Shenzhen	24/01/2020	24/01/2020	No information	Shenzhen Municipal Health Commission	http://wjw.sz.gov.cn/	Du			Wuhan
2123	30	female			22/01/2020	22/01/2020	2155	38	female			Shenzhen	28/01/2020	28/01/2020	Non-household	Shenzhen Municipal Health Commission	http://wjw.sz.gov.cn/	Du			Wuhan
2134	51	male			24/01/2020	24/01/2020	2168	39	male			Shenzhen	26/01/2020	26/01/2020	No information	Shenzhen Municipal Health Commission	http://wjw.sz.gov.cn/	Du			Wuhan
2238	34	female			27/01/2020	27/01/2020	2178	6	female			Shenzhen	26/01/2020	26/01/2020	No information	Shenzhen Municipal Health Commission	http://wjw.sz.gov.cn/	Du			Wuhan
2176	49	female			24/01/2020	24/01/2020	2180	51	male			Shenzhen	24/01/2020	24/01/2020	No information	Shenzhen Municipal Health Commission	http://wjw.sz.gov.cn/	Du			Shenzhen
2176	49	female			24/01/2020	24/01/2020	2181	25	female			Shenzhen	23/01/2020	23/01/2020	Non-household	Shenzhen Municipal Health Commission	http://wjw.sz.gov.cn/	Du			Shenzhen
2076	49	female			21/01/2020	21/01/2020	2193	76	male			Shenzhen	27/01/2020	27/01/2020	Non-household	Shenzhen Municipal Health Commission	http://wjw.sz.gov.cn/	Du			Wuhan
2161	36	male			19/01/2020	19/01/2020	2201	34	female			Shenzhen	26/01/2020	26/01/2020	Non-household	Shenzhen Municipal Health Commission	http://wjw.sz.gov.cn/	Du			Lengshui River, Hunan
2161	36	male			19/01/2020	19/01/2020	2202	63	female			Shenzhen	25/01/2020	25/01/2020	Non-household	Shenzhen Municipal Health Commission	http://wjw.sz.gov.cn/	Du			Lengshui River, Hunan
2179	39	female			24/01/2020	24/01/2020	2212	14	male			Shenzhen	27/01/2020	27/01/2020	Non-household	Shenzhen Municipal Health Commission	http://wjw.sz.gov.cn/	Du			Wuhan
2162	64	male			18/01/2020	18/01/2020	2216	37	male			Shenzhen	24/01/2020	24/01/2020	Non-household	Shenzhen Municipal Health Commission	http://wjw.sz.gov.cn/	Du			Wuhan
2227	56	female			26/01/2020	26/01/2020	2231	29	female			Shenzhen	29/01/2020	29/01/2020	Non-household	Shenzhen Municipal Health Commission	http://wjw.sz.gov.cn/	Du			Xianning, Hubei
2059	69	male			12/1/2020	12/1/2020	2235	25	female			Shenzhen	25/01/2020	25/01/2020	Non-household	Shenzhen Municipal Health Commission	http://wjw.sz.gov.cn/	Du			Wuhan
2226	60	male			28/01/2020	28/01/2020	2250	32	male			Shenzhen	30/01/2020	30/01/2020	No information	Shenzhen Municipal Health Commission	http://wjw.sz.gov.cn/	Du			Zhijiang, Hubei
2226	60	male			28/01/2020	28/01/2020	2251	6	male			Shenzhen	30/01/2020	30/01/2020	Household	Shenzhen Municipal Health Commission	http://wjw.sz.gov.cn/	Du			Zhijiang, Hubei
2226	60	male			28/01/2020	28/01/2020	2252	53	female			Shenzhen	24/01/2020	24/01/2020	Non-household	Shenzhen Municipal Health Commission	http://wjw.sz.gov.cn/	Du			Zhijiang, Hubei
2180	51	male			24/01/2020	24/01/2020	2263	48	male			Shenzhen	25/01/2020	25/01/2020	No information	Shenzhen Municipal Health Commission	http://wjw.sz.gov.cn/	Du			Shenzhen
2071	61	male			18/01/2020	18/01/2020	2265	61	female			Shenzhen	22/01/2020	22/01/2020	Non-household	Shenzhen Municipal Health Commission	http://wjw.sz.gov.cn/	Du			Wuhan
2233	37	male			28/01/2020	28/01/2020	2266	60	female			Shenzhen	31/01/2020	31/01/2020	Non-household	Shenzhen Municipal Health Commission	http://wjw.sz.gov.cn/	Du			Wuhan
2267	45	female			30/01/2020	30/01/2020	2268	17	female			Shenzhen	28/01/2020	28/01/2020	Household	Shenzhen Municipal Health Commission	http://wjw.sz.gov.cn/	Du			Jingzhou, Hubei
2125	78	male			23/01/2020	23/01/2020	2269	67	female			Shenzhen	24/01/2020	24/01/2020	Non-household	Shenzhen Municipal Health Commission	http://wjw.sz.gov.cn/	Du			Wuhan
2264	41	male			26/01/2020	26/01/2020	2270	40	female			Shenzhen	29/01/2020	29/01/2020	Non-household	Shenzhen Municipal Health Commission	http://wjw.sz.gov.cn/	Du			Harbin
2230	29	male			28/01/2020	28/01/2020	2271	50	male			Shenzhen	25/01/2020	25/01/2020	No information	Shenzhen Municipal Health Commission	http://wjw.sz.gov.cn/	Du			Wuhan
2230	29	male			28/01/2020	28/01/2020	2272	50	female			Shenzhen	25/01/2020	25/01/2020	Non-household	Shenzhen Municipal Health Commission	http://wjw.sz.gov.cn/	Du			Wuhan
2232	41	male			26/01/2020	26/01/2020	2274	12	female			Shenzhen	1/2/2020	1/2/2020	Non-household	Shenzhen Municipal Health Commission	http://wjw.sz.gov.cn/	Du			Wuhan
2246	55	male			28/01/2020	28/01/2020	2275	8	male			Shenzhen	1/2/2020	1/2/2020	Non-household	Shenzhen Municipal Health Commission	http://wjw.sz.gov.cn/	Du			Huanggang, Hubei
2245	33	female			24/01/2020	24/01/2020	2277	7	female			Shenzhen	31/01/2020	31/01/2020	Non-household	Shenzhen Municipal Health Commission	http://wjw.sz.gov.cn/	Du			Wuhan
2179	39	female			24/01/2020	24/01/2020	2278	43	male			Shenzhen	27/01/2020	27/01/2020	No information	Shenzhen Municipal Health Commission	http://wjw.sz.gov.cn/	Du			Wuhan
2153	36	female			24/01/2020	24/01/2020	2279	53	female			Shenzhen	28/01/2020	28/01/2020	Non-household	Shenzhen Municipal Health Commission	http://wjw.sz.gov.cn/	Du			Wuhan
2219	41	male			23/01/2020	23/01/2020	2280	41	female			Shenzhen	28/01/2020	28/01/2020	Non-household	Shenzhen Municipal Health Commission	http://wjw.sz.gov.cn/	Du			Wuhan
2257	36	male			26/01/2020	26/01/2020	2284	31	female			Shenzhen	23/01/2020	23/01/2020	No information	Shenzhen Municipal Health Commission	http://wjw.sz.gov.cn/	Du			Macao
2267	45	female			30/01/2020	30/01/2020	2285	13	male			Shenzhen	26/01/2020	26/01/2020	No information	Shenzhen Municipal Health Commission	http://wjw.sz.gov.cn/	Du			Jingzhou, Hubei
2256	56	female			22/01/2020	22/01/2020	2289	31	male			Shenzhen	30/01/2020	30/01/2020	Non-household	Shenzhen Municipal Health Commission	http://wjw.sz.gov.cn/	Du			Honghu, Hubei
2161	36	male			19/01/2020	19/01/2020	2291	65	male			Shenzhen	26/01/2020	26/01/2020	Household	Shenzhen Municipal Health Commission	http://wjw.sz.gov.cn/	Du			Lengshui River, Hunan
2094	7	female			24/01/2020	24/01/2020	2294	65	female			Shenzhen	30/01/2020	30/01/2020	Non-household	Shenzhen Municipal Health Commission	http://wjw.sz.gov.cn/	Du			Wuhan
2253	9	female			29/01/2020	29/01/2020	2295	46	male			Shenzhen	27/01/2020	27/01/2020	Non-household	Shenzhen Municipal Health Commission	http://wjw.sz.gov.cn/	Du			Wuhan
2267	45	female			30/01/2020	30/01/2020	2296	50	male			Shenzhen	22/01/2020	22/01/2020	Household	Shenzhen Municipal Health Commission	http://wjw.sz.gov.cn/	Du			Jingzhou, Hubei
2261	59	female			24/01/2020	24/01/2020	2300	34	female			Shenzhen	25/01/2020	25/01/2020	Non-household	Shenzhen Municipal Health Commission	http://wjw.sz.gov.cn/	Du			Wuhan
2180	51	male			24/01/2020	24/01/2020	2302	34	male			Shenzhen	26/01/2020	26/01/2020	Household	Shenzhen Municipal Health Commission	http://wjw.sz.gov.cn/	Du			Shenzhen
2298	46	male			29/01/2020	29/01/2020	2303	18	male			Shenzhen	27/01/2020	27/01/2020	Non-household	Shenzhen Municipal Health Commission	http://wjw.sz.gov.cn/	Du			Xiaogan, Hubei
2173	86	male			25/01/2020	25/01/2020	2304	45	female			Shenzhen	29/01/2020	29/01/2020	Non-household	Shenzhen Municipal Health Commission	http://wjw.sz.gov.cn/	Du			Huanggang, Hubei
2302	34	male			26/01/2020	26/01/2020	2308	34	female			Shenzhen	28/01/2020	28/01/2020	Non-household	Shenzhen Municipal Health Commission	http://wjw.sz.gov.cn/	Du			Shenzhen
2302	34	male			26/01/2020	26/01/2020	2311	4	female			Shenzhen	28/01/2020	28/01/2020	Non-household	Shenzhen Municipal Health Commission	http://wjw.sz.gov.cn/	Du			Shenzhen
2302	34	male			26/01/2020	26/01/2020	2314	50	female			Shenzhen	30/01/2020	30/01/2020	Non-household	Shenzhen Municipal Health Commission	http://wjw.sz.gov.cn/	Du			Shenzhen
2182	47	female			23/01/2020	23/01/2020	2321	79	female			Shenzhen	22/01/2020	22/01/2020	Non-household	Shenzhen Municipal Health Commission	http://wjw.sz.gov.cn/	Du			Wuhan
2136	64	female			17/01/2020	17/01/2020	2322	37	female			Shenzhen	28/01/2020	28/01/2020	Non-household	Shenzhen Municipal Health Commission	http://wjw.sz.gov.cn/	Du			Wuhan
2327	36	male			1/2/2020	1/2/2020	2328	37	female			Shenzhen	1/2/2020	1/2/2020	No information	Shenzhen Municipal Health Commission	http://wjw.sz.gov.cn/	Du			Ezhou, Hubei
2327	36	male			1/2/2020	1/2/2020	2329	7	female			Shenzhen	1/2/2020	1/2/2020	Non-household	Shenzhen Municipal Health Commission	http://wjw.sz.gov.cn/	Du			Ezhou, Hubei
2188	78	male			26/01/2020	26/01/2020	2330	78	female			Shenzhen	30/01/2020	30/01/2020	Non-household	Shenzhen Municipal Health Commission	http://wjw.sz.gov.cn/	Du			Wuhan
2325	55	female			25/01/2020	25/01/2020	2331	56	male			Shenzhen	26/01/2020	26/01/2020	Non-household	Shenzhen Municipal Health Commission	http://wjw.sz.gov.cn/	Du			Wuhan
2256	56	female			22/01/2020	22/01/2020	2332	28	female			Shenzhen	30/01/2020	30/01/2020	Household	Shenzhen Municipal Health Commission	http://wjw.sz.gov.cn/	Du			Honghu, Hubei
2346	23	female			4/2/2020	4/2/2020	2347	31	male			Shenzhen	3/2/2020	3/2/2020	No information	Shenzhen Municipal Health Commission	http://wjw.sz.gov.cn/	Du			Ganzhou
2356	50	male			27/01/2020	27/01/2020	2357	49	female			Shenzhen	27/01/2020	27/01/2020	Non-household	Shenzhen Municipal Health Commission	http://wjw.sz.gov.cn/	Du			Wuhan
2292	40	male			30/01/2020	30/01/2020	2358	34	female			Shenzhen	28/01/2020	28/01/2020	Non-household	Shenzhen Municipal Health Commission	http://wjw.sz.gov.cn/	Du			Wuhan
2292	40	male			30/01/2020	30/01/2020	2359	2	female			Shenzhen	3/2/2020	3/2/2020	Non-household	Shenzhen Municipal Health Commission	http://wjw.sz.gov.cn/	Du			Wuhan
2315	44	female			24/01/2020	24/01/2020	2360	13	male			Shenzhen	3/2/2020	3/2/2020	Non-household	Shenzhen Municipal Health Commission	http://wjw.sz.gov.cn/	Du			Shenzhen
2355	64	female			28/01/2020	28/01/2020	2361	69	male			Shenzhen	1/2/2020	1/2/2020	Non-household	Shenzhen Municipal Health Commission	http://wjw.sz.gov.cn/	Du			Malaysia-Singapore-Hong Kong
2362	56	male			27/01/2020	27/01/2020	2363	41	female			Shenzhen	27/01/2020	27/01/2020	Non-household	Shenzhen Municipal Health Commission	http://wjw.sz.gov.cn/	Du			Ganzhou
2240	35	male			27/01/2020	27/01/2020	2364	2	male			Shenzhen	5/2/2020	5/2/2020	Non-household	Shenzhen Municipal Health Commission	http://wjw.sz.gov.cn/	Du			Xianning, Hubei
2299	67	female			26/01/2020	26/01/2020	2366	46	male			Shenzhen	26/01/2020	26/01/2020	Non-household	Shenzhen Municipal Health Commission	http://wjw.sz.gov.cn/	Du			Wuhan
2292	40	male			30/01/2020	30/01/2020	2368	66	female			Shenzhen	5/2/2020	5/2/2020	Non-household	Shenzhen Municipal Health Commission	http://wjw.sz.gov.cn/	Du			Wuhan
2292	40	male			30/01/2020	30/01/2020	2369	66	male			Shenzhen	5/2/2020	5/2/2020	Household	Shenzhen Municipal Health Commission	http://wjw.sz.gov.cn/	Du			Wuhan
2218	66	male			29/01/2020	29/01/2020	2370	60	female			Shenzhen	5/2/2020	5/2/2020	Household	Shenzhen Municipal Health Commission	http://wjw.sz.gov.cn/	Du			Shenzhen
2297	38	male			27/01/2020	27/01/2020	2371	5	female			Shenzhen	29/01/2020	29/01/2020	Household	Shenzhen Municipal Health Commission	http://wjw.sz.gov.cn/	Du			Qianjiang, Hubei
2297	38	male			27/01/2020	27/01/2020	2372	36	female			Shenzhen	3/2/2020	3/2/2020	Household	Shenzhen Municipal Health Commission	http://wjw.sz.gov.cn/	Du			Qianjiang, Hubei
2309	71	male			25/01/2020	25/01/2020	2373	66	female			Shenzhen	4/2/2020	4/2/2020	Non-household	Shenzhen Municipal Health Commission	http://wjw.sz.gov.cn/	Du			Wuhan
2134	51	male			24/01/2020	24/01/2020	2374	2	male			Shenzhen	5/2/2020	5/2/2020	Non-household	Shenzhen Municipal Health Commission	http://wjw.sz.gov.cn/	Du			Wuhan
2632	53	female			1/2/2020	1/2/2020	2631	70	female			Yuxi	31/01/2020	31/01/2020	Non-household	Yuxi Municipal Health Commission	ynswsjkw.yn.gov.cn	Du			Wuhan
2632	53	female			1/2/2020	1/2/2020	2633	72	male			Yuxi	31/01/2020	31/01/2020	Household	Yuxi Municipal Health Commission	ynswsjkw.yn.gov.cn	Du			Wuhan
2632	53	female			1/2/2020	1/2/2020	2634	62	female			Yuxi	31/01/2020	31/01/2020	No information	Yuxi Municipal Health Commission	ynswsjkw.yn.gov.cn	Du			Wuhan
2632	53	female			1/2/2020	1/2/2020	2635	37	female			Yuxi	31/01/2020	31/01/2020	Household	Yuxi Municipal Health Commission	ynswsjkw.yn.gov.cn	Du			Wuhan
2632	53	female			1/2/2020	1/2/2020	2637	10	female			Yuxi	31/01/2020	31/01/2020	Household	Yuxi Municipal Health Commission	ynswsjkw.yn.gov.cn	Du			Wuhan
2690	31	female			23/01/2020	23/01/2020	2694	31	male			North Sea	26/01/2020	26/01/2020	No information	Beihai Municipal Health Commission	http://xxgk.beihai.gov.cn/bhswshjhsywyh/#.airline	Du			Wuhan
2690	31	female			23/01/2020	23/01/2020	2696	2	male			North Sea	31/01/2020	31/01/2020	Household	Beihai Municipal Health Commission	http://xxgk.beihai.gov.cn/bhswshjhsywyh/#.airline	Du			Wuhan
2684	41	female			20/01/2020	20/01/2020	2697	43	male			North Sea	30/01/2020	30/01/2020	Non-household	Beihai Municipal Health Commission	http://xxgk.beihai.gov.cn/bhswshjhsywyh/#.airline	Du			Wuhan
2695	29	female			25/01/2020	25/01/2020	2701	53	female			North Sea	29/01/2020	29/01/2020	Household	Beihai Municipal Health Commission	http://xxgk.beihai.gov.cn/bhswshjhsywyh/#.airline	Du			North Sea
2723	34	female			19/01/2020	19/01/2020	2724	10	female			Guilin	23/01/2020	23/01/2020	No information	Guilin Municipal Health Commission	http://wjw.guilin.gov.cn/	Du			Wuhan
2720	41	male			20/01/2020	20/01/2020	2731	70	male			Guilin	25/01/2020	25/01/2020	Non-household	Guilin Municipal Health Commission	http://wjw.guilin.gov.cn/	Du			Wuhan
2732	33	female			20/01/2020	20/01/2020	2735	42	male			Guilin	27/01/2020	27/01/2020	Non-household	Guilin Municipal Health Commission	http://wjw.guilin.gov.cn/	Du			Wuhan
2736	30	male			27/01/2020	27/01/2020	2737	58	female			Guilin	29/01/2020	29/01/2020	Non-household	Guilin Municipal Health Commission	http://wjw.guilin.gov.cn/	Du			Wuhan
2741	24	male			31/01/2020	31/01/2020	2743	24	female			Guilin	25/01/2020	25/01/2020	Non-household	Guilin Municipal Health Commission	http://wjw.guilin.gov.cn/	Du			Wuhan
2742	51	female			18/01/2020	18/01/2020	2746	59	male			Guilin	4/2/2020	4/2/2020	Non-household	Guilin Municipal Health Commission	http://wjw.guilin.gov.cn/	Du			North Sea
2749	49	female			21/01/2020	21/01/2020	2751	38	female			Hechi	27/01/2020	27/01/2020	Non-household	Hechi Municipal Health Commission	http://wjw.hechi.gov.cn/	Du			Wuhan
2755	85	male			19/01/2020	19/01/2020	2762	36	female			Hechi	30/01/2020	30/01/2020	Household	Hechi Municipal Health Commission	http://wjw.hechi.gov.cn/	Du			Hechi
2770	27	female			22/01/2020	22/01/2020	2771	41	male			Liuzhou	25/01/2020	25/01/2020	Non-household	Liuzhou Municipal Health Commission	http://wjw.liuzhou.gov.cn/	Du			Wuhan
2770	27	female			22/01/2020	22/01/2020	2772	6	male			Liuzhou	26/01/2020	26/01/2020	Non-household	Liuzhou Municipal Health Commission	http://wjw.liuzhou.gov.cn/	Du			Wuhan
2770	27	female			22/01/2020	22/01/2020	2773	65	male			Liuzhou	28/01/2020	28/01/2020	Non-household	Liuzhou Municipal Health Commission	http://wjw.liuzhou.gov.cn/	Du			Wuhan
2770	27	female			22/01/2020	22/01/2020	2775	51	female			Liuzhou	30/01/2020	30/01/2020	Household	Liuzhou Municipal Health Commission	http://wjw.liuzhou.gov.cn/	Du			Wuhan
2776	43	female			28/01/2020	28/01/2020	2777	46	male			Liuzhou	29/01/2020	29/01/2020	Household	Liuzhou Municipal Health Commission	http://wjw.liuzhou.gov.cn/	Du			Liuzhou
2770	27	female			22/01/2020	22/01/2020	2779	20	male			Liuzhou	31/01/2020	31/01/2020	Household	Liuzhou Municipal Health Commission	http://wjw.liuzhou.gov.cn/	Du			Wuhan
2770	27	female			22/01/2020	22/01/2020	2780	2	male			Liuzhou	31/01/2020	31/01/2020	Non-household	Liuzhou Municipal Health Commission	http://wjw.liuzhou.gov.cn/	Du			Wuhan
2784	67	female			24/01/2020	24/01/2020	2785	70	male			Nanning	24/01/2020	24/01/2020	No information	Nanning Municipal Health Commission	http://wjw.nanning.gov.cn/	Du			Wuhan
2784	67	female			24/01/2020	24/01/2020	2786	35	female			Nanning	24/01/2020	24/01/2020	Non-household	Nanning Municipal Health Commission	http://wjw.nanning.gov.cn/	Du			Wuhan
2790	49	male			31/01/2020	31/01/2020	2791	20	male			Nanning	31/01/2020	31/01/2020	Non-household	Nanning Municipal Health Commission	http://wjw.nanning.gov.cn/	Du			No information
2790	49	male			31/01/2020	31/01/2020	2792	49	female			Nanning	31/01/2020	31/01/2020	Non-household	Nanning Municipal Health Commission	http://wjw.nanning.gov.cn/	Du			No information
2790	49	male			31/01/2020	31/01/2020	2799	90	male			Nanning	2/2/2020	2/2/2020	Household	Nanning Municipal Health Commission	http://wjw.nanning.gov.cn/	Du			No information
2800	70	male			2/2/2020	2/2/2020	2803	5	female			Nanning	4/2/2020	4/2/2020	No information	Nanning Municipal Health Commission	http://wjw.nanning.gov.cn/	Du			Nanning
2800	70	male			2/2/2020	2/2/2020	2804	70	female			Nanning	6/2/2020	6/2/2020	Non-household	Nanning Municipal Health Commission	http://wjw.nanning.gov.cn/	Du			Nanning
2813	35	female			28/01/2020	28/01/2020	2814	71	male			Yulin	28/01/2020	28/01/2020	Non-household	Yulin Municipal Health Commission	http://wjw.yulin.gov.cn/	Du			No information
2915	63	male			31/01/2020	31/01/2020	2916	64	female			Suzhou	31/01/2020	31/01/2020	Non-household	Suzhou Municipal Health Commission	http://wsjkw.suzhou.gov.cn/	Du			Wuhan
2915	63	male			31/01/2020	31/01/2020	2923	9	female			Suzhou	27/01/2020	27/01/2020	No information	Suzhou Municipal Health Commission	http://wsjkw.suzhou.gov.cn/	Du			Wuhan
2959	58	female			27/01/2020	27/01/2020	2960	72	female			Nanjing	1/2/2020	1/2/2020	No information	Nanjing Municipal Health Commission	http://wjw.nanjing.gov.cn/	Du			Nanjing
2959	58	female			27/01/2020	27/01/2020	2961	68	male			Nanjing	31/01/2020	31/01/2020	No information	Nanjing Municipal Health Commission	http://wjw.nanjing.gov.cn/	Du			Nanjing
2989		male			19/01/2020	19/01/2020	2992		female			Xuzhou	24/01/2020	24/01/2020	No information	Xuzhou Municipal Health Commission	http://ws.xz.gov.cn/	Du			Wuhan
2989		male			19/01/2020	19/01/2020	2993		male			Xuzhou	24/01/2020	24/01/2020	No information	Xuzhou Municipal Health Commission	http://ws.xz.gov.cn/	Du			Wuhan
2989		male			19/01/2020	19/01/2020	2994		female			Xuzhou	22/01/2020	22/01/2020	Household	Xuzhou Municipal Health Commission	http://ws.xz.gov.cn/	Du			Wuhan
2996		male			22/01/2020	22/01/2020	3029	71	female			Xuzhou	30/01/2020	30/01/2020	No information	Xuzhou Municipal Health Commission	http://ws.xz.gov.cn/	Du			Wuhan
3076	36	male			22/01/2020	22/01/2020	3077	26	male			Wuxi	29/01/2020	29/01/2020	Household	Wuxi Municipal Health Commission	http://wjw.wuxi.gov.cn/	Du			Wuxi
3081	58	male			23/01/2020	23/01/2020	3082	31	female			Wuxi	25/01/2020	25/01/2020	No information	Wuxi Municipal Health Commission	http://wjw.wuxi.gov.cn/	Du			Hubei
3113	53	male			30/01/2020	30/01/2020	3118	65	male			Taizhou	31/01/2020	31/01/2020	Household	Taizhou Municipal Health Commission	http://wjw.taizhou.gov.cn/	Du			Shiyan
3113	53	male			30/01/2020	30/01/2020	3119	41	male			Taizhou	30/01/2020	30/01/2020	Household	Taizhou Municipal Health Commission	http://wjw.taizhou.gov.cn/	Du			Shiyan
3113	53	male			30/01/2020	30/01/2020	3120	64	female			Taizhou	31/01/2020	31/01/2020	Non-household	Taizhou Municipal Health Commission	http://wjw.taizhou.gov.cn/	Du			Shiyan
3135	67	male			25/01/2020	25/01/2020	3137	68	female			Nantong	1/2/2020	1/2/2020	No information	Nantong Municipal Health Commission	http://wjw.nantong.gov.cn/	Du			No information
3142	56	male			27/01/2020	27/01/2020	3143	55	female			Nantong	28/01/2020	28/01/2020	No information	Nantong Municipal Health Commission	http://wjw.nantong.gov.cn/	Du			No information
3162	52	male			2/2/2020	2/2/2020	3163	76	male			Lianyungang	3/2/2020	3/2/2020	No information	Lianyungang Municipal People's Government	http://www.lyg.gov.cn/zglygzfmhwz/xxzx/xxzxRd.htm	Du			Lianyungang
3162	52	male			2/2/2020	2/2/2020	3164	53	female			Lianyungang	4/2/2020	4/2/2020	Non-household	Lianyungang Municipal People's Government	http://www.lyg.gov.cn/zglygzfmhwz/xxzx/xxzxRd.htm	Du			Lianyungang
3205	47	female			21/01/2020	21/01/2020	3213	23	female			Yangzhou	22/01/2020	22/01/2020	No information	Yangzhou Municipal Health Commission	http://wjw.yangzhou.gov.cn/	Du			Wuhan
3336	49	male			26/01/2020	26/01/2020	3337	59	female			Fuzhou	28/01/2020	28/01/2020	No information	Fuzhou Municipal Health Commission	http://www.fuzhou.gov.cn/zgfzzt/swjw/fzwj/wjgg/	Du			Fuzhou
3339	44	female			28/01/2020	28/01/2020	3338	49	male			Fuzhou	29/01/2020	29/01/2020	No information	Fuzhou Municipal Health Commission	http://www.fuzhou.gov.cn/zgfzzt/swjw/fzwj/wjgg/	Du			Wuhan
3339	44	female			28/01/2020	28/01/2020	3340	43	female			Fuzhou	23/01/2020	23/01/2020	No information	Fuzhou Municipal Health Commission	http://www.fuzhou.gov.cn/zgfzzt/swjw/fzwj/wjgg/	Du			Wuhan
3353	45	male			26/01/2020	26/01/2020	3354	32	male			Fuzhou	1/2/2020	1/2/2020	No information	Fuzhou Municipal Health Commission	http://www.fuzhou.gov.cn/zgfzzt/swjw/fzwj/wjgg/	Du			Fuzhou
3353	45	male			26/01/2020	26/01/2020	3355	32	female			Fuzhou	1/2/2020	1/2/2020	No information	Fuzhou Municipal Health Commission	http://www.fuzhou.gov.cn/zgfzzt/swjw/fzwj/wjgg/	Du			Fuzhou
3357	66	female			26/01/2020	26/01/2020	3356	72	male			Fuzhou	30/01/2020	30/01/2020	No information	Fuzhou Municipal Health Commission	http://www.fuzhou.gov.cn/zgfzzt/swjw/fzwj/wjgg/	Du			Zhuzhou, Hunan Province
3357	66	female			26/01/2020	26/01/2020	3371	45	male			Fuzhou	26/01/2020	26/01/2020	Household	Fuzhou Municipal Health Commission	http://www.fuzhou.gov.cn/zgfzzt/swjw/fzwj/wjgg/	Du			Zhuzhou, Hunan Province
3840	46	male			18/01/2020	18/01/2020	3841	80	female			Xinyang	19/01/2020	19/01/2020	No information	Xinyang Municipal Health Commission	http://www.hnxywjw.gov.cn/	Du			Wuhan
3840	46	male			18/01/2020	18/01/2020	3842	46	female			Xinyang	23/01/2020	23/01/2020	No information	Xinyang Municipal Health Commission	http://www.hnxywjw.gov.cn/	Du			Wuhan
3840	46	male			18/01/2020	18/01/2020	3843	45	female			Xinyang	22/01/2020	22/01/2020	No information	Xinyang Municipal Health Commission	http://www.hnxywjw.gov.cn/	Du			Wuhan
3841	80	female			19/01/2020	19/01/2020	3844	56	female			Xinyang	27/01/2020	27/01/2020	Non-household	Xinyang Municipal Health Commission	http://www.hnxywjw.gov.cn/	Du			Xinyang
3845	52	male			18/01/2020	18/01/2020	3889	52	female			Xinyang	23/01/2020	23/01/2020	No information	Xinyang Municipal Health Commission	http://www.hnxywjw.gov.cn/	Du			Xinyang
3905	52	female			22/01/2020	22/01/2020	3906	27	female			Xinyang	23/01/2020	23/01/2020	No information	Xinyang Municipal Health Commission	http://www.hnxywjw.gov.cn/	Du			Xinyang
3869	56	female			21/01/2020	21/01/2020	3913	29	male			Xinyang	20/01/2020	20/01/2020	Household	Xinyang Municipal Health Commission	http://www.hnxywjw.gov.cn/	Du			Wuhan
3923	46	female			24/01/2020	24/01/2020	3924	42	male			Xinyang	26/01/2020	26/01/2020	No information	Xinyang Municipal Health Commission	http://www.hnxywjw.gov.cn/	Du			Wuhan
3840	46	male			18/01/2020	18/01/2020	3934	57	male			Xinyang	29/01/2020	29/01/2020	No information	Xinyang Municipal Health Commission	http://www.hnxywjw.gov.cn/	Du			Wuhan
3908	28	female			23/01/2020	23/01/2020	3948	26	male			Xinyang	31/01/2020	31/01/2020	No information	Xinyang Municipal Health Commission	http://www.hnxywjw.gov.cn/	Du			Wuhan
3905	52	female			22/01/2020	22/01/2020	3949	54	male			Xinyang	29/01/2020	29/01/2020	No information	Xinyang Municipal Health Commission	http://www.hnxywjw.gov.cn/	Du			Xinyang
3907	53	male			19/01/2020	19/01/2020	3951	28	female			Xinyang	22/01/2020	22/01/2020	Household	Xinyang Municipal Health Commission	http://www.hnxywjw.gov.cn/	Du			Xinyang
3951	28	female			22/01/2020	22/01/2020	3952	52	female			Xinyang	26/01/2020	26/01/2020	No information	Xinyang Municipal Health Commission	http://www.hnxywjw.gov.cn/	Du			Xinyang
3845	52	male			18/01/2020	18/01/2020	3955	44	male			Xinyang	28/01/2020	28/01/2020	No information	Xinyang Municipal Health Commission	http://www.hnxywjw.gov.cn/	Du			Xinyang
3899	30	male			24/01/2020	24/01/2020	3969	56	male			Xinyang	2/2/2020	2/2/2020	No information	Xinyang Municipal Health Commission	http://www.hnxywjw.gov.cn/	Du			Wuhan
3884	27	male			27/01/2020	27/01/2020	3973	1	male			Xinyang	4/2/2020	4/2/2020	No information	Xinyang Municipal Health Commission	http://www.hnxywjw.gov.cn/	Du			Wuhan
3884	27	male			27/01/2020	27/01/2020	3974	52	female			Xinyang	1/2/2020	1/2/2020	No information	Xinyang Municipal Health Commission	http://www.hnxywjw.gov.cn/	Du			Wuhan
3995	71	male			31/01/2020	31/01/2020	3996	68	female			Xinyang	1/2/2020	1/2/2020	No information	Xinyang Municipal Health Commission	http://www.hnxywjw.gov.cn/	Du			Xinyang
4011	62	male			27/01/2020	27/01/2020	4012	57	female			Xinyang	22/01/2020	22/01/2020	Non-household	Xinyang Municipal Health Commission	http://www.hnxywjw.gov.cn/	Du			Xinyang
3907	53	male			19/01/2020	19/01/2020	4013	48	male			Xinyang	3/2/2020	3/2/2020	No information	Xinyang Municipal Health Commission	http://www.hnxywjw.gov.cn/	Du			Xinyang
3894	61	male			26/01/2020	26/01/2020	4014	60	female			Xinyang	30/01/2020	30/01/2020	No information	Xinyang Municipal Health Commission	http://www.hnxywjw.gov.cn/	Du			Wuhan
3894	61	male			26/01/2020	26/01/2020	4015	32	male			Xinyang	27/01/2020	27/01/2020	No information	Xinyang Municipal Health Commission	http://www.hnxywjw.gov.cn/	Du			Wuhan
3867	18	female			20/01/2020	20/01/2020	4020	69	female			Xinyang	1/2/2020	1/2/2020	No information	Xinyang Municipal Health Commission	http://www.hnxywjw.gov.cn/	Du			Wuhan
4022	30	male			6/2/2020	6/2/2020	4023	60	female			Xinyang	2/2/2020	2/2/2020	No information	Xinyang Municipal Health Commission	http://www.hnxywjw.gov.cn/	Du			Wuhan
3938	51	male			26/01/2020	26/01/2020	4025	79	female			Xinyang	4/2/2020	4/2/2020	Household	Xinyang Municipal Health Commission	http://www.hnxywjw.gov.cn/	Du			Xinyang
4089	36	male			29/01/2020	29/01/2020	4046	29	female			Nanyang	19/01/2020	19/01/2020	No information	Nanyang Municipal Health Commission	http://nyws.nanyang.gov.cn/	Du			Wuhan
4089	36	male			29/01/2020	29/01/2020	4047	58	male			Nanyang	19/01/2020	19/01/2020	No information	Nanyang Municipal Health Commission	http://nyws.nanyang.gov.cn/	Du			Wuhan
4027	62	male			22/01/2020	22/01/2020	4074	69	male			Nanyang	23/01/2020	23/01/2020	No information	Nanyang Municipal Health Commission	http://nyws.nanyang.gov.cn/	Du			Wuhan
4044	55	female			20/01/2020	20/01/2020	4081	48	male			Nanyang	29/01/2020	29/01/2020	Non-household	Nanyang Municipal Health Commission	http://nyws.nanyang.gov.cn/	Du			Wuhan
4044	55	female			20/01/2020	20/01/2020	4082	33	female			Nanyang	28/01/2020	28/01/2020	No information	Nanyang Municipal Health Commission	http://nyws.nanyang.gov.cn/	Du			Wuhan
4044	55	female			20/01/2020	20/01/2020	4084	30	female			Nanyang	30/01/2020	30/01/2020	No information	Nanyang Municipal Health Commission	http://nyws.nanyang.gov.cn/	Du			Wuhan
4065	59	male			14/01/2020	14/01/2020	4088	56	female			Nanyang	24/01/2020	24/01/2020	Non-household	Nanyang Municipal Health Commission	http://nyws.nanyang.gov.cn/	Du			Nanyang
4113	33	male			25/01/2020	25/01/2020	4114	6	male			Nanyang	25/01/2020	25/01/2020	No information	Nanyang Municipal Health Commission	http://nyws.nanyang.gov.cn/	Du			Wuhan
4044	55	female			20/01/2020	20/01/2020	4117	33	female			Nanyang	31/01/2020	31/01/2020	No information	Nanyang Municipal Health Commission	http://nyws.nanyang.gov.cn/	Du			Wuhan
4096	57	male			17/01/2020	17/01/2020	4119	50	female			Nanyang	31/01/2020	31/01/2020	No information	Nanyang Municipal Health Commission	http://nyws.nanyang.gov.cn/	Du			Wuhan
4087	34	male			22/01/2020	22/01/2020	4120	3	male			Nanyang	1/2/2020	1/2/2020	No information	Nanyang Municipal Health Commission	http://nyws.nanyang.gov.cn/	Du			Wuhan
4078	22	male			29/01/2020	29/01/2020	4124	54	female			Nanyang	1/2/2020	1/2/2020	No information	Nanyang Municipal Health Commission	http://nyws.nanyang.gov.cn/	Du			Wuhan
4110	29	male			30/01/2020	30/01/2020	4134	59	female			Nanyang	2/2/2020	2/2/2020	No information	Nanyang Municipal Health Commission	http://nyws.nanyang.gov.cn/	Du			Wuhan
4088	56	female			24/01/2020	24/01/2020	4135	59	female			Nanyang	1/2/2020	1/2/2020	No information	Nanyang Municipal Health Commission	http://nyws.nanyang.gov.cn/	Du			Nanyang
4109	27	female			29/01/2020	29/01/2020	4141	64	female			Nanyang	4/2/2020	4/2/2020	No information	Nanyang Municipal Health Commission	http://nyws.nanyang.gov.cn/	Du			Xiangyang, Hubei
4057	29	male			22/01/2020	22/01/2020	4142	30	male			Nanyang	1/2/2020	1/2/2020	No information	Nanyang Municipal Health Commission	http://nyws.nanyang.gov.cn/	Du			Wuhan
4116	69	female			28/01/2020	28/01/2020	4143	54	male			Nanyang	3/2/2020	3/2/2020	No information	Nanyang Municipal Health Commission	http://nyws.nanyang.gov.cn/	Du			Nanyang
4065	59	male			14/01/2020	14/01/2020	4146	74	male			Nanyang	3/2/2020	3/2/2020	No information	Nanyang Municipal Health Commission	http://nyws.nanyang.gov.cn/	Du			Nanyang
4162	47	female			26/01/2020	26/01/2020	4163	83	female			Jiaozuo	31/01/2020	31/01/2020	No information	Jiaozuo Municipal Health Commission	http://www.jzswjw.gov.cn/	Du			Nanning, Guangxi Province
4165	28	male			1/2/2020	1/2/2020	4166	58	male			Jiaozuo	1/2/2020	1/2/2020	No information	Jiaozuo Municipal Health Commission	http://www.jzswjw.gov.cn/	Du			No information
4162	47	female			26/01/2020	26/01/2020	4167	52	male			Jiaozuo	21/01/2020	21/01/2020	Household	Jiaozuo Municipal Health Commission	http://www.jzswjw.gov.cn/	Du			Nanning, Guangxi Province
4163	83	female			31/01/2020	31/01/2020	4169	31	male			Jiaozuo	31/01/2020	31/01/2020	No information	Jiaozuo Municipal Health Commission	http://www.jzswjw.gov.cn/	Du			Jiaozuo
4171	52	male			1/2/2020	1/2/2020	4172	51	female			Jiaozuo	1/2/2020	1/2/2020	No information	Jiaozuo Municipal Health Commission	http://www.jzswjw.gov.cn/	Du			No information
4175	39	female			27/01/2020	27/01/2020	4176	40	male			Kaifeng	27/01/2020	27/01/2020	Household	Kaifeng Municipal Health Commission	http://www.kfwsjsw.gov.cn/	Du			Wuhan
4187	33	male			3/2/2020	3/2/2020	4188	33	female			Kaifeng	3/2/2020	3/2/2020	No information	Kaifeng Municipal Health Commission	http://www.kfwsjsw.gov.cn/	Du			Wuhan
4184	33	male			1/2/2020	1/2/2020	4190	43	female			Kaifeng	3/2/2020	3/2/2020	No information	Kaifeng Municipal Health Commission	http://www.kfwsjsw.gov.cn/	Du			Shenzhen
4183	30	male			27/01/2020	27/01/2020	4191	28	female			Kaifeng	6/2/2020	6/2/2020	No information	Kaifeng Municipal Health Commission	http://www.kfwsjsw.gov.cn/	Du			Wuhan
4192	45	male			23/01/2020	23/01/2020	4193	47	female			Anyang	14/01/2020	14/01/2020	No information	Official Weibo of Anyang municipal People's government	https://weibo.com/ayxww	Du			Anyang
4192	45	male			23/01/2020	23/01/2020	4194	48	female			Anyang	25/01/2020	25/01/2020	No information	Official Weibo of Anyang municipal People's government	https://weibo.com/ayxww	Du			Anyang
4266	51	female			24/01/2020	24/01/2020	4268	29	female			Xu Chang	27/01/2020	27/01/2020	No information	Xu Chang Municipal Health Commission	http://xcswjw.xuchang.gov.cn/	Du			Wuhan
4281	24	male			26/01/2020	26/01/2020	4282	51	female			Xu Chang	29/01/2020	29/01/2020	No information	Xu Chang Municipal Health Commission	http://xcswjw.xuchang.gov.cn/	Du			Wuhan
4266	51	female			24/01/2020	24/01/2020	4283	63	NaN			Xu Chang	31/01/2020	31/01/2020	No information	Xu Chang Municipal Health Commission	http://xcswjw.xuchang.gov.cn/	Du			Wuhan
4285	60	female			27/01/2020	27/01/2020	4286	59	male			Xu Chang	28/01/2020	28/01/2020	Household	Xu Chang Municipal Health Commission	http://xcswjw.xuchang.gov.cn/	Du			Xu Chang
4320	31	male			4/2/2020	4/2/2020	4321	30	female			Hebi	3/2/2020	3/2/2020	No information	Hebi Municipal Health Commission	https://wsjkw.hebi.gov.cn/	Du			Wuhan
4322	53	male			8/2/2020	8/2/2020	4323	53	female			Hebi	7/2/2020	7/2/2020	No information	Hebi Municipal Health Commission	https://wsjkw.hebi.gov.cn/	Du			Wuhan
4322	53	male			8/2/2020	8/2/2020	4324	32	male			Hebi	28/01/2020	28/01/2020	Non-household'	Hebi Municipal Health Commission	https://wsjkw.hebi.gov.cn/	Du			Wuhan
4329	49	female			22/01/2020	22/01/2020	4330	80	female			Sanmenxia	24/01/2020	24/01/2020	No information	Sanmenxia Municipal Health Commission	http://wjw.smx.gov.cn/	Du			Wuhan
4347	32	male			24/01/2020	24/01/2020	4353	32	female			Shangqiu	25/01/2020	25/01/2020	No information	Shangqiu Municipal People's Government	http://www.shangqiu.gov.cn/Category_1026/Index.aspx	Du			Wuhan
4339	45	female			24/01/2020	24/01/2020	4355	50	male			Shangqiu	26/01/2020	26/01/2020	No information	Shangqiu Municipal People's Government	http://www.shangqiu.gov.cn/Category_1026/Index.aspx	Du			Wuhan
4402	21	male			21/01/2020	21/01/2020	4403	19	male			Zhoukou	23/01/2020	23/01/2020	No information	Zhoukou Municipal People's Government	http://www.hazhoukou.gov.cn/Home/gkml?code=gstg	Du			Wuhan
4404	46	male			18/01/2020	18/01/2020	4405	49	female			Zhoukou	19/01/2020	19/01/2020	No information	Zhoukou Municipal People's Government	http://www.hazhoukou.gov.cn/Home/gkml?code=gstg	Du			Wuhan
4407	26	male			17/01/2020	17/01/2020	4408	28	female			Zhoukou	23/01/2020	23/01/2020	No information	Zhoukou Municipal People's Government	http://www.hazhoukou.gov.cn/Home/gkml?code=gstg	Du			No information
4407	26	male			17/01/2020	17/01/2020	4409	51	female			Zhoukou	24/01/2020	24/01/2020	No information	Zhoukou Municipal People's Government	http://www.hazhoukou.gov.cn/Home/gkml?code=gstg	Du			No information
4412	40	male			18/01/2020	18/01/2020	4433	44	female			Zhoukou	27/01/2020	27/01/2020	No information	Zhoukou Municipal People's Government	http://www.hazhoukou.gov.cn/Home/gkml?code=gstg	Du			Wuhan
4405	49	female			19/01/2020	19/01/2020	4440	79	female			Zhoukou	21/01/2020	21/01/2020	No information	Zhoukou Municipal People's Government	http://www.hazhoukou.gov.cn/Home/gkml?code=gstg	Du			Zhoukou
4440	79	female			21/01/2020	21/01/2020	4447	70	female			Zhoukou	29/01/2020	29/01/2020	No information	Zhoukou Municipal People's Government	http://www.hazhoukou.gov.cn/Home/gkml?code=gstg	Du			Zhoukou
4402	21	male			21/01/2020	21/01/2020	4449	47	male			Zhoukou	27/01/2020	27/01/2020	No information	Zhoukou Municipal People's Government	http://www.hazhoukou.gov.cn/Home/gkml?code=gstg	Du			Wuhan
4420	35	male			23/01/2020	23/01/2020	4452	33	female			Zhoukou	28/01/2020	28/01/2020	No information	Zhoukou Municipal People's Government	http://www.hazhoukou.gov.cn/Home/gkml?code=gstg	Du			Wuhan
4420	35	male			23/01/2020	23/01/2020	4453	31	female			Zhoukou	19/01/2020	19/01/2020	No information	Zhoukou Municipal People's Government	http://www.hazhoukou.gov.cn/Home/gkml?code=gstg	Du			Wuhan
4456	56	female			26/01/2020	26/01/2020	4457	57	male			Zhoukou	28/01/2020	28/01/2020	No information	Zhoukou Municipal People's Government	http://www.hazhoukou.gov.cn/Home/gkml?code=gstg	Du			Zhoukou
4460	70	male			29/01/2020	29/01/2020	4462	25	female			Zhoukou	30/01/2020	30/01/2020	No information	Zhoukou Municipal People's Government	http://www.hazhoukou.gov.cn/Home/gkml?code=gstg	Du			Zhoukou
5512	30	male			20/01/2020	20/01/2020	5516	52	female			Jiaxing	24/01/2020	24/01/2020	Non-household	Jiaxing Municipal Health Commission	http://wsjkw.jiaxing.gov.cn/	Du			Wuhan
5510	57	male			18/01/2020	18/01/2020	5517	55	female			Jiaxing	16/01/2020	16/01/2020	Non-household	Jiaxing Municipal Health Commission	http://wsjkw.jiaxing.gov.cn/	Du			Wuhan
5550	46	male			20/01/2020	20/01/2020	5551	72	male			Lishui	24/01/2020	24/01/2020	Non-household	Lishui Municipal Health Commission	http://wsjsw.lishui.gov.cn/	Du			Yueqing
5770	36	female			7/1/2020	7/1/2020	5771	31	male			Huaihua	10/1/2020	10/1/2020	No information	Huaihua Municipal Health Commission	http://www.huaihua.gov.cn/wsjkw/c100577/list.shtml	Du			Wuhan
5871	51	female			22/01/2020	22/01/2020	5870	51	male			Changde	24/01/2020	24/01/2020	No information	Changde Municipal Health Commission	http://wjw.changde.gov.cn	Du			Wuhan
6427	60	male			25/01/2020	25/01/2020	6430	47	male			Liaoyuan	31/01/2020	31/01/2020	No information	Liaoyuan Municipal Health Commission	http://wjw.liaoyuan.gov.cn	Du			Wuhan
6427	60	male			25/01/2020	25/01/2020	6431	7	female			Liaoyuan	2/2/2020	2/2/2020	No information	Liaoyuan Municipal Health Commission	http://wjw.liaoyuan.gov.cn	Du			Wuhan
6453	21	female			23/01/2020	23/01/2020	6454	44	male			Shenyang	24/01/2020	24/01/2020	No information	Shenyang Municipal Health Commission	http://wjw.shenyang.gov.cn/	Du			Wuhan
6453	21	female			23/01/2020	23/01/2020	6455	45	female			Shenyang	25/01/2020	25/01/2020	Household	Shenyang Municipal Health Commission	http://wjw.shenyang.gov.cn/	Du			Wuhan
6478	46	male			11/1/2020	11/1/2020	6480	78	female			Dalian	24/01/2020	24/01/2020	Non-household	Dalian Municipal Health Commission	http://hcod.dl.gov.cn/web/guest	Du			Wuhan
6477	37	male			16/01/2020	16/01/2020	6487	63	female			Dalian	30/01/2020	30/01/2020	No information	Dalian Municipal Health Commission	http://hcod.dl.gov.cn/web/guest	Du			Wuhan
6495	35	male			23/01/2020	23/01/2020	6496	34	female			Jinzhou	28/01/2020	28/01/2020	Household	Jinzhou Municipal Health Commission	http://wjw.jz.gov.cn/jzwswindex/photolist?id=1305	Du			Wuhan
6495	35	male			23/01/2020	23/01/2020	6499	8	female			Jinzhou	31/01/2020	31/01/2020	Household	Jinzhou Municipal Health Commission	http://wjw.jz.gov.cn/jzwswindex/photolist?id=1305	Du			Wuhan
6495	35	male			23/01/2020	23/01/2020	6500	55	female			Jinzhou	8/2/2020	8/2/2020	Household	Jinzhou Municipal Health Commission	http://wjw.jz.gov.cn/jzwswindex/photolist?id=1305	Du			Wuhan
6516	60	female			23/01/2020	23/01/2020	6519	33	male			Huludao	28/01/2020	28/01/2020	Household	Huludao Municipal Health Commission	http://wsjk.hld.gov.cn/	Du			Wuhan
6530	55	female			23/01/2020	23/01/2020	6531	81	female			Fuxin	24/01/2020	24/01/2020	No information	Fuxin Municipal Health Commission	http://www.fuxin.gov.cn/fxswsj/	Du			Fuxin
6533	51	male			22/01/2020	22/01/2020	6535	51	male			Tieling	25/01/2020	25/01/2020	Household	Tieling Municipal Health Commission	http://wjw.tieling.gov.cn/tielingws/tzgg/index.html	Du			No information
6544	42	male			22/01/2020	22/01/2020	6546	72	male			Chaoyang	28/01/2020	28/01/2020	Non-household	Chaoyang Municipal People's Government	http://www.zgcy.gov.cn/ZGCY/zwgk/004050/	Du			Wuhan
6586	44	male			23/01/2020	23/01/2020	6591	40	female			Lanzhou	1/2/2020	1/2/2020	Household	Gansu Province Municipal Health Commission	http://wsjk.gansu.gov.cn/	Du			Taizhou
6585	73	female			28/01/2020	28/01/2020	6592	49	male			Lanzhou	30/01/2020	30/01/2020	Household	Gansu Province Municipal Health Commission	http://wsjk.gansu.gov.cn/	Du			Lanzhou
6585	73	female			28/01/2020	28/01/2020	6594	46	female			Lanzhou	5/2/2020	5/2/2020	No information	Gansu Province Municipal Health Commission	http://wsjk.gansu.gov.cn/	Du			Lanzhou
6588	51	female			21/01/2020	21/01/2020	6606	54	female			Dingxi	21/01/2020	21/01/2020	No information	Gansu Province Municipal Health Commission	http://wsjk.gansu.gov.cn/	Du			Thailand
6588	51	female			21/01/2020	21/01/2020	6607	29	female			Dingxi	24/01/2020	24/01/2020	Non-household	Gansu Province Municipal Health Commission	http://wsjk.gansu.gov.cn/	Du			Thailand
6588	51	female			21/01/2020	21/01/2020	6608	38	female			Dingxi	21/01/2020	21/01/2020	No information	Gansu Province Municipal Health Commission	http://wsjk.gansu.gov.cn/	Du			Thailand
6609	29	male			30/01/2020	30/01/2020	6610	27	female			Pingliang	1/2/2020	1/2/2020	No information	Gansu Province Municipal Health Commission	http://wsjk.gansu.gov.cn/	Du			Pingliang
6612	63	male			28/01/2020	28/01/2020	6620	68	male			Tianshui	26/01/2020	26/01/2020	Non-household	Gansu Province Municipal Health Commission	http://wsjk.gansu.gov.cn/	Du			Wuhan
6612	63	male			28/01/2020	28/01/2020	6621	55	female			Tianshui	29/01/2020	29/01/2020	Non-household	Gansu Province Municipal Health Commission	http://wsjk.gansu.gov.cn/	Du			Wuhan
6634	66	male			18/01/2020	18/01/2020	6640	32	male			Xi'an	25/01/2020	25/01/2020	No information	Shanxi Province Municipal Health Commission	http://sxwjw.shaanxi.gov.cn/	Du			Xi'an
6632	70	male			25/01/2020	25/01/2020	6643	70	female			Xi'an	26/01/2020	26/01/2020	No information	Shanxi Province Municipal Health Commission	http://sxwjw.shaanxi.gov.cn/	Du			Xi'an
6639	55	male			23/01/2020	23/01/2020	6647	55	female			Xi'an	28/01/2020	28/01/2020	Non-household	Shanxi Province Municipal Health Commission	http://sxwjw.shaanxi.gov.cn/	Du			Xi'an
6635	45	female			23/01/2020	23/01/2020	6648	13	male			Xi'an	26/01/2020	26/01/2020	No information	Shanxi Province Municipal Health Commission	http://sxwjw.shaanxi.gov.cn/	Du			Xiaogan City, Hubei Province
6634	66	male			18/01/2020	18/01/2020	6652	57	female			Xi'an	18/01/2020	18/01/2020	Non-household	Shanxi Province Municipal Health Commission	http://sxwjw.shaanxi.gov.cn/	Du			Xi'an
6627	64	female			10/1/2020	10/1/2020	6655	62	male			Xi'an	26/01/2020	26/01/2020	No information	Shanxi Province Municipal Health Commission	http://sxwjw.shaanxi.gov.cn/	Du			Wuhan
6656	39	female			28/01/2020	28/01/2020	6657	41	male			Xi'an	27/01/2020	27/01/2020	No information	Shanxi Province Municipal Health Commission	http://sxwjw.shaanxi.gov.cn/	Du			Wuhan
6655	62	male			26/01/2020	26/01/2020	6664	34	female			Xi'an	22/01/2020	22/01/2020	No information	Shanxi Province Municipal Health Commission	http://sxwjw.shaanxi.gov.cn/	Du			Wuhan
6642	49	female			24/01/2020	24/01/2020	6669	47	female			Xi'an	25/01/2020	25/01/2020	Household	Shanxi Province Municipal Health Commission	http://sxwjw.shaanxi.gov.cn/	Du			Shanghai
6634	66	male			18/01/2020	18/01/2020	6673	35	female			Xi'an	25/01/2020	25/01/2020	No information	Shanxi Province Municipal Health Commission	http://sxwjw.shaanxi.gov.cn/	Du			Xi'an
6639	55	male			23/01/2020	23/01/2020	6675	24	male			Xi'an	27/01/2020	27/01/2020	Household	Shanxi Province Municipal Health Commission	http://sxwjw.shaanxi.gov.cn/	Du			Xi'an
6641	49	female			26/01/2020	26/01/2020	6680	52	male			Xi'an	28/01/2020	28/01/2020	No information	Shanxi Province Municipal Health Commission	http://sxwjw.shaanxi.gov.cn/	Du			Wuhan
6670	54	male			30/01/2020	30/01/2020	6681	53	female			Xi'an	1/2/2020	1/2/2020	No information	Shanxi Province Municipal Health Commission	http://sxwjw.shaanxi.gov.cn/	Du			Xi'an
6642	49	female			24/01/2020	24/01/2020	6683	50	female			Xi'an	31/01/2020	31/01/2020	Non-household	Shanxi Province Municipal Health Commission	http://sxwjw.shaanxi.gov.cn/	Du			Shanghai
6658	40	male			28/01/2020	28/01/2020	6685	33	male			Xi'an	24/01/2020	24/01/2020	No information	Shanxi Province Municipal Health Commission	http://sxwjw.shaanxi.gov.cn/	Du			Wuhan
6688	47	male			23/01/2020	23/01/2020	6689	43	female			Xi'an	28/01/2020	28/01/2020	Non-household	Shanxi Province Municipal Health Commission	http://sxwjw.shaanxi.gov.cn/	Du			Xi'an
6656	39	female			28/01/2020	28/01/2020	6695	65	male			Xi'an	3/2/2020	3/2/2020	No information	Shanxi Province Municipal Health Commission	http://sxwjw.shaanxi.gov.cn/	Du			Wuhan
6684	66	male			1/2/2020	1/2/2020	6701	69	female			Xi'an	4/2/2020	4/2/2020	Non-household	Shanxi Province Municipal Health Commission	http://sxwjw.shaanxi.gov.cn/	Du			Xi'an
6658	40	male			28/01/2020	28/01/2020	6705	65	female			Xi'an	30/01/2020	30/01/2020	Non-household	Shanxi Province Municipal Health Commission	http://sxwjw.shaanxi.gov.cn/	Du			Wuhan
6710	68	male			20/01/2020	20/01/2020	6714	37	female			Weinan	31/01/2020	31/01/2020	Household	Shanxi Province Municipal Health Commission	http://sxwjw.shaanxi.gov.cn/	Du			Wuhan
2811	40	male			15/01/2020	15/01/2020	6717	60	male			Yulin	28/01/2020	28/01/2020	No information	Shanxi Province Municipal Health Commission	http://sxwjw.shaanxi.gov.cn/	Du			No information
6720	46	female			18/01/2020	18/01/2020	6721	50	male			Baoji	22/01/2020	22/01/2020	No information	Shanxi Province Municipal Health Commission	http://sxwjw.shaanxi.gov.cn/	Du			Baoji
6722	46	male			21/01/2020	21/01/2020	6724	43	female			Baoji	27/01/2020	27/01/2020	Household	Shanxi Province Municipal Health Commission	http://sxwjw.shaanxi.gov.cn/	Du			Wuhan
6722	46	male			21/01/2020	21/01/2020	6725	64	male			Baoji	29/01/2020	29/01/2020	No information	Shanxi Province Municipal Health Commission	http://sxwjw.shaanxi.gov.cn/	Du			Wuhan
6722	46	male			21/01/2020	21/01/2020	6727	56	male			Baoji	21/01/2020	21/01/2020	Household	Shanxi Province Municipal Health Commission	http://sxwjw.shaanxi.gov.cn/	Du			Wuhan
6723	27	male			24/01/2020	24/01/2020	6730	71	male			Baoji	3/2/2020	3/2/2020	Household	Shanxi Province Municipal Health Commission	http://sxwjw.shaanxi.gov.cn/	Du			Wuhan
6623	22	male			20/01/2020	20/01/2020	6733	32	female			Shangluo	25/01/2020	25/01/2020	Non-household	Shanxi Province Municipal Health Commission	http://sxwjw.shaanxi.gov.cn/	Du			Wuhan
6747	38	female			22/01/2020	22/01/2020	6746	37	male			Hanzhong	27/01/2020	27/01/2020	Non-household	Shanxi Province Municipal Health Commission	http://sxwjw.shaanxi.gov.cn/	Du			Wuhan
6753	41	male			31/01/2020	31/01/2020	6754	39	female			Hanzhong	27/01/2020	27/01/2020	Household	Shanxi Province Municipal Health Commission	http://sxwjw.shaanxi.gov.cn/	Du			Hanzhong
6776	46	male			23/01/2020	23/01/2020	6781	74	male			Tongchuan	27/01/2020	27/01/2020	No information	Shanxi Province Municipal Health Commission	http://sxwjw.shaanxi.gov.cn/	Du			Wuhan
6776	46	male			23/01/2020	23/01/2020	6782	76	female			Tongchuan	29/01/2020	29/01/2020	Non-household	Shanxi Province Municipal Health Commission	http://sxwjw.shaanxi.gov.cn/	Du			Wuhan
6776	46	male			23/01/2020	23/01/2020	6783	27	female			Tongchuan	29/01/2020	29/01/2020	Non-household	Shanxi Province Municipal Health Commission	http://sxwjw.shaanxi.gov.cn/	Du			Wuhan
6746	37	male			27/01/2020	27/01/2020	6798	41	female			Xianyang	25/01/2020	25/01/2020	Household	Shanxi Province Municipal Health Commission	http://sxwjw.shaanxi.gov.cn/	Du			Wuhan
6796	62	female			24/01/2020	24/01/2020	6799	40	male			Xianyang	28/01/2020	28/01/2020	No information	Shanxi Province Municipal Health Commission	http://sxwjw.shaanxi.gov.cn/	Du			Wuhan
6805		female			18/01/2020	18/01/2020	6806		female			Daqing	18/01/2020	18/01/2020	No information	Daqing Municipal People's Government	http://www.daqing.gov.cn/	Du			Wuhan
6805		female			18/01/2020	18/01/2020	6807		female			Daqing	21/01/2020	21/01/2020	Non-household	Daqing Municipal People's Government	http://www.daqing.gov.cn/	Du			Wuhan
6805		female			18/01/2020	18/01/2020	6809		female			Daqing	27/01/2020	27/01/2020	No information	Daqing Municipal People's Government	http://www.daqing.gov.cn/	Du			Wuhan
6805		female			18/01/2020	18/01/2020	6810		male			Daqing	29/01/2020	29/01/2020	No information	Daqing Municipal People's Government	http://www.daqing.gov.cn/	Du			Wuhan
6811		No information			23/01/2020	23/01/2020	6812		female			Daqing	28/01/2020	28/01/2020	Household	Daqing Municipal People's Government	http://www.daqing.gov.cn/	Du			Wuhan
6811		No information			23/01/2020	23/01/2020	6813		male			Daqing	30/01/2020	30/01/2020	Household	Daqing Municipal People's Government	http://www.daqing.gov.cn/	Du			Wuhan
siping-1	33	male			25/01/2020	25/01/2020	siping-4	33	male			Siping	27/01/2020	27/01/2020	No	The People_ Government of Siping Municipality	http://www.siping.gov.cn	Du			Wuhan
fuyang-65	55	female			28/01/2020	28/01/2020	fuyang-99	28	male			Fuyang	8/2/2020	8/2/2020	No	Fuyang Municipal Health Commussion	http://wjw.fy.gov.cn/	Du			Fuyang
fuyang-118	48	male			6/2/2020	6/2/2020	fuyang-119	6	male			Fuyang	13/02/2020	13/02/2020	Household	Fuyang Municipal Health Commussion	http://wjw.fy.gov.cn/	Du			Fuyang
hefei-5	50	female			10/1/2020	10/1/2020	hefei-7	40	female			Hefei	15/01/2020	15/01/2020	No	Hefei Municipal Health Commussion	http://wjw.hefei.gov.cn/	Du			Wuhan
hefei-5	50	female			10/1/2020	10/1/2020	hefei-8	51	male			Hefei	17/01/2020	17/01/2020	No	Hefei Municipal Health Commussion	http://wjw.hefei.gov.cn/	Du			Wuhan
hefei-17	22	male			22/01/2020	22/01/2020	hefei-18	22	male			Hefei	24/01/2020	24/01/2020	No	Hefei Municipal Health Commussion	http://wjw.hefei.gov.cn/	Du			Wuhan
hefei-17	22	male			22/01/2020	22/01/2020	hefei-19	22	male			Hefei	25/01/2020	25/01/2020	No	Hefei Municipal Health Commussion	http://wjw.hefei.gov.cn/	Du			Wuhan
hefei-17	22	male			22/01/2020	22/01/2020	hefei-20	22	male			Hefei	24/01/2020	24/01/2020	No	Hefei Municipal Health Commussion	http://wjw.hefei.gov.cn/	Du			Wuhan
hefei-17	22	male			22/01/2020	22/01/2020	hefei-21	24	male			Hefei	22/01/2020	22/01/2020	No	Hefei Municipal Health Commussion	http://wjw.hefei.gov.cn/	Du			Wuhan
hefei-134	73	female			22/01/2020	22/01/2020	hefei-133	78	male			Hefei	31/01/2020	31/01/2020	Household	Hefei Municipal Health Commussion	http://wjw.hefei.gov.cn/	Du			Hefei
hefei-137	67	female			30/01/2020	30/01/2020	hefei-138	69	male			Hefei	5/2/2020	5/2/2020	Household	Hefei Municipal Health Commussion	http://wjw.hefei.gov.cn/	Du			Lu'an
huaibei-7	46	female			26/01/2020	26/01/2020	huaibei-9	17	male			Huaibei	1/2/2020	1/2/2020	Household	Huaibei Municipal Health Commussion	http://wjw.huaibei.gov.cn/xxfb/tzgg/index.html	Du			Huaibei
huaibei-7	46	female			26/01/2020	26/01/2020	huaibei-10	17	male			Huaibei	1/2/2020	1/2/2020	Household	Huaibei Municipal Health Commussion	http://wjw.huaibei.gov.cn/xxfb/tzgg/index.html	Du			Huaibei
huaibei-7	46	female			26/01/2020	26/01/2020	huaibei-17	58	female			Huaibei	3/2/2020	3/2/2020	No	Huaibei Municipal Health Commussion	http://wjw.huaibei.gov.cn/xxfb/tzgg/index.html	Du			Beijing
huainan-25	59	female			12/2/2020	12/2/2020	huainan-26	56	male			Huainan	13/02/2020	13/02/2020	Household	Huainan Municipal Health Commussion	http://wjw.huainan.gov.cn/xwzx/tzgg/index.html	Du			Huainan
liuan-29	41	male			27/01/2020	27/01/2020	liuan-30	41	female			Lu'an	30/01/2020	30/01/2020	Household	Lu'an Municipal People's Government	http://www.luan.gov.cn/zwzx/jrla/zxyw/index.html	Du			Lu'an
liuan-31	37	male			29/01/2020	29/01/2020	liuan-32	33	female			Lu'an	2/2/2020	2/2/2020	Household	Lu'an Municipal People's Government	http://www.luan.gov.cn/zwzx/jrla/zxyw/index.html	Du			Shanghai
liuan-11	45	male			22/01/2020	22/01/2020	liuan-33	65	female			Lu'an	1/2/2020	1/2/2020	No	Lu'an Municipal People's Government	http://www.luan.gov.cn/zwzx/jrla/zxyw/index.html	Du			Bengbu
liuan-2	38	male			18/01/2020	18/01/2020	liuan-34	37	female			Lu'an	2/2/2020	2/2/2020	No	Lu'an Municipal People's Government	http://www.luan.gov.cn/zwzx/jrla/zxyw/index.html	Du			Wuhan
liuan-14	34	male			25/01/2020	25/01/2020	liuan-36	26	male			Lu'an	2/2/2020	2/2/2020	No	Lu'an Municipal People's Government	http://www.luan.gov.cn/zwzx/jrla/zxyw/index.html	Du			Suzhou
liuan-15	37	male			25/01/2020	25/01/2020	liuan-37	64	male			Lu'an	31/01/2020	31/01/2020	Household	Lu'an Municipal People's Government	http://www.luan.gov.cn/zwzx/jrla/zxyw/index.html	Du			Lu'an
liuan-14	34	male			25/01/2020	25/01/2020	liuan-38	57	male			Lu'an	4/2/2020	4/2/2020	Household	Lu'an Municipal People's Government	http://www.luan.gov.cn/zwzx/jrla/zxyw/index.html	Du			Suzhou
liuan-41	22	male			22/01/2020	22/01/2020	liuan-46	42	male			Lu'an	6/2/2020	6/2/2020	No	Lu'an Municipal People's Government	http://www.luan.gov.cn/zwzx/jrla/zxyw/index.html	Du			Wuhan
liuan-34	37	female			2/2/2020	2/2/2020	liuan-50	42	male			Lu'an	5/2/2020	5/2/2020	Household	Lu'an Municipal People's Government	http://www.luan.gov.cn/zwzx/jrla/zxyw/index.html	Du			Lu'an
liuan-34	37	female			2/2/2020	2/2/2020	liuan-51	3	male			Lu'an	6/2/2020	6/2/2020	Household	Lu'an Municipal People's Government	http://www.luan.gov.cn/zwzx/jrla/zxyw/index.html	Du			Lu'an
liuan-41	22	male			22/01/2020	22/01/2020	liuan-53	42	male			Lu'an	6/2/2020	6/2/2020	No	Lu'an Municipal People's Government	http://www.luan.gov.cn/zwzx/jrla/zxyw/index.html	Du			Wuhan
liuan-29	41	male			27/01/2020	27/01/2020	liuan-54	29	male			Lu'an	7/2/2020	7/2/2020	No	Lu'an Municipal People's Government	http://www.luan.gov.cn/zwzx/jrla/zxyw/index.html	Du			Lu'an
liuan-46	42	male			6/2/2020	6/2/2020	liuan-55	41	male			Lu'an	3/2/2020	3/2/2020	No	Lu'an Municipal People's Government	http://www.luan.gov.cn/zwzx/jrla/zxyw/index.html	Du			Lu'an
liuan-23	36	male			29/01/2020	29/01/2020	liuan-56	78	female			Lu'an	28/01/2020	28/01/2020	No	Lu'an Municipal People's Government	http://www.luan.gov.cn/zwzx/jrla/zxyw/index.html	Du			Chengdu
liuan-58	26	female			9/2/2020	9/2/2020	liuan-66	1	female			Lu'an	14/02/2020	14/02/2020	Household	Lu'an Municipal People's Government	http://www.luan.gov.cn/zwzx/jrla/zxyw/index.html	Du			Lu'an
liuan-65	31	male			13/02/2020	13/02/2020	liuan-68	50	male			Lu'an	15/02/2020	15/02/2020	No	Lu'an Municipal People's Government	http://www.luan.gov.cn/zwzx/jrla/zxyw/index.html	Du			Tianjin
bengbu-67	59	male			29/01/2020	29/01/2020	bengbu-75	25	male			Bengbu	5/2/2020	5/2/2020	Household	The People_ Government of Bengbu Municipality	http://www.bengbu.gov.cn	Du			Bengbu
bengbu-66	55	male			31/01/2020	31/01/2020	bengbu-79	55	female			Bengbu	6/2/2020	6/2/2020	Household	The People_ Government of Bengbu Municipality	http://www.bengbu.gov.cn	Du			Bengbu
bengbu-62	28	female			5/2/2020	5/2/2020	bengbu-80	2	female			Bengbu	28/01/2020	28/01/2020	Household	The People_ Government of Bengbu Municipality	http://www.bengbu.gov.cn	Du			Bengbu
bengbu-58	49	male			30/01/2020	30/01/2020	bengbu-109	49	female			Bengbu	9/2/2020	9/2/2020	Household	The People_ Government of Bengbu Municipality	http://www.bengbu.gov.cn	Du			Bengbu
bengbu-64	66	female			6/2/2020	6/2/2020	bengbu-118	70	male			Bengbu	13/02/2020	13/02/2020	Household	The People_ Government of Bengbu Municipality	http://www.bengbu.gov.cn	Du			Bengbu
anqing-21	25	male			23/01/2020	23/01/2020	anqing-22	50	female			Anqing	24/01/2020	24/01/2020	Household	Anqing Municipal Health Commussion	Official Weibo of Anyang municipal People's government	Du			Wuhan
anqing-21	25	male			23/01/2020	23/01/2020	anqing-23	53	male			Anqing	26/01/2020	26/01/2020	Household	Anqing Municipal Health Commussion	Official Weibo of Anyang municipal People's government	Du			Wuhan
anqing-59	57	male			27/01/2020	27/01/2020	anqing-60	55	female			Anqing	30/01/2020	30/01/2020	Household	Anqing Municipal Health Commussion	Official Weibo of Anyang municipal People's government	Du			Anqing
anqing-59	57	male			27/01/2020	27/01/2020	anqing-61	54	male			Anqing	1/2/2020	1/2/2020	No	Anqing Municipal Health Commussion	Official Weibo of Anyang municipal People's government	Du			Anqing
tongling-14	49	male			24/01/2020	24/01/2020	tongling-21	50	female			Tongling	4/2/2020	4/2/2020	No	The People_ Government of Tongling Municipality	http://www.tl.gov.cn	Du			Wuhan
tongling-24	27	female			30/01/2020	30/01/2020	tongling-25	50	female			Tongling	8/2/2020	8/2/2020	Household	The People_ Government of Tongling Municipality	http://www.tl.gov.cn	Du			Shanghai
haozhou-12	71	male			22/01/2020	22/01/2020	haozhou-13	70	female			Haozhou	26/01/2020	26/01/2020	Household	The People_ Government of Haozhou Municipality	http://www.bozhou.gov.cn	Du			Wuhan
haozhou-5	35	male			19/01/2020	19/01/2020	haozhou-15	48	male			Haozhou	26/01/2020	26/01/2020	No	The People_ Government of Haozhou Municipality	http://www.bozhou.gov.cn	Du			Xiangtan
haozhou-28	54	female			30/01/2020	30/01/2020	haozhou-32	13	female			Haozhou	28/01/2020	28/01/2020	No	The People_ Government of Haozhou Municipality	http://www.bozhou.gov.cn	Du			Haozhou
haozhou-12	71	male			22/01/2020	22/01/2020	haozhou-34	37	female			Haozhou	26/01/2020	26/01/2020	Household	The People_ Government of Haozhou Municipality	http://www.bozhou.gov.cn	Du			Wuhan
haozhou-15	48	male			26/01/2020	26/01/2020	haozhou-39	47	male			Haozhou	23/01/2020	23/01/2020	No	The People_ Government of Haozhou Municipality	http://www.bozhou.gov.cn	Du			Haozhou
haozhou-8	40	female			21/01/2020	21/01/2020	haozhou-47	25	male			Haozhou	26/01/2020	26/01/2020	No	The People_ Government of Haozhou Municipality	http://www.bozhou.gov.cn	Du			Wuhan
haozhou-55	50	male			30/01/2020	30/01/2020	haozhou-60	26	male			Haozhou	3/2/2020	3/2/2020	Household	The People_ Government of Haozhou Municipality	http://www.bozhou.gov.cn	Du			Haozhou
haozhou-30	42	female			28/01/2020	28/01/2020	haozhou-74	38	male			Haozhou	27/01/2020	27/01/2020	No	The People_ Government of Haozhou Municipality	http://www.bozhou.gov.cn	Du			Haozhou
haozhou-12	71	male			25/01/2020	25/01/2020	haozhou-75	43	male			Haozhou	2/2/2020	2/2/2020	No	The People_ Government of Haozhou Municipality	http://www.bozhou.gov.cn	Du			Wuhan
haozhou-26	47	male			29/01/2020	29/01/2020	haozhou-78	56	male			Haozhou	31/01/2020	31/01/2020	No	The People_ Government of Haozhou Municipality	http://www.bozhou.gov.cn	Du			Haozhou
haozhou-26	47	male			29/01/2020	29/01/2020	haozhou-84	21	male			Haozhou	3/2/2020	3/2/2020	No	The People_ Government of Haozhou Municipality	http://www.bozhou.gov.cn	Du			Haozhou
haozhou-26	47	male			29/01/2020	29/01/2020	haozhou-88	44	female			Haozhou	29/01/2020	29/01/2020	No	The People_ Government of Haozhou Municipality	http://www.bozhou.gov.cn	Du			Haozhou
haozhou-88	44	female			29/01/2020	29/01/2020	haozhou-89	47	male			Suzhou	2/2/2020	2/2/2020	Household	The People_ Government of Haozhou Municipality	http://www.bozhou.gov.cn	Du			Haozhou
suzhou-12	38	male			1/2/2020	1/2/2020	suzhou-16	38	female			Suzhou	1/2/2020	1/2/2020	Household	The People_ Government of Suzhou Municipality	http://www.ahsz.gov.cn	Du			Wuhan
suzhou-12	38	male			1/2/2020	1/2/2020	suzhou-23	44	male			Suzhou	5/2/2020	5/2/2020	No	The People_ Government of Suzhou Municipality	http://www.ahsz.gov.cn	Du			Wuhan
maanshan-3	54	female			18/01/2020	18/01/2020	maanshan-21	52	male			Ma'anshan	24/01/2020	24/01/2020	no	The People_ Government of Maanshan Municipality	http://www.mas.gov.cn	Du			Wuhan
maanshan-21	52	male			24/01/2020	24/01/2020	maanshan-26	37	female			Ma'anshan	29/01/2020	29/01/2020	no	The People_ Government of Maanshan Municipality	http://www.mas.gov.cn	Du			Ma'anshan
maanshan-29	50	female			29/01/2020	29/01/2020	maanshan-30	57	female			Ma'anshan	27/01/2020	27/01/2020	no	The People_ Government of Maanshan Municipality	http://www.mas.gov.cn	Du			Ma'anshan
shenyang-4	21	female			23/01/2020	23/01/2020	shenyang-5	44	male			Shenyang	24/01/2020	24/01/2020	household	Shenyang Municipal Health Commussion	http://wjw.shenyang.gov.cn/	Du			Wuhan
dalian-3	46	male			11/1/2020	11/1/2020	dalian-5	78	female			Dalian	24/01/2020	24/01/2020	household	Dalian Municipal Health Commussion	http://hcod.dl.gov.cn/web/guest	Du			Wuhan
jinzhou-4	35	male			23/01/2020	23/01/2020	jinzhou-5	34	female			Jinzhou	28/01/2020	28/01/2020	household	Jinzhou Municipal Health Commussion	http://wjw.jz.gov.cn/jzwswindex/photolist?id=1305	Du			Wuhan
jinzhou-4	35	male			23/01/2020	23/01/2020	jinzhou-8	8	female			Jinzhou	31/01/2020	31/01/2020	household	Jinzhou Municipal Health Commussion	http://wjw.jz.gov.cn/jzwswindex/photolist?id=1305	Du			Wuhan
jinzhou-4	35	male			23/01/2020	23/01/2020	jinzhou-9	55	female			Jinzhou	8/2/2020	8/2/2020	household	Jinzhou Municipal Health Commussion	http://wjw.jz.gov.cn/jzwswindex/photolist?id=1305	Du			Wuhan
jinzhou-4	35	male			23/01/2020	23/01/2020	jinzhou-11	56	male			Jinzhou	9/2/2020	9/2/2020	household	Jinzhou Municipal Health Commussion	http://wjw.jz.gov.cn/jzwswindex/photolist?id=1305	Du			Wuhan
huludao-3	60	female			23/01/2020	23/01/2020	huludao-6	33	male			Huludao	2/2/2020	2/2/2020	household	The People_ Government of Huludao Municipality	http://www.hld.gov.cn	Du			Wuhan
tangshan-15	28	female			28/01/2020	28/01/2020	tangshan-21	67	male			Tangshan	28/01/2020	28/01/2020	no	Tangshan Municipal Health Commussion	http://wsjkwyh.tangshan.gov.cn/	Du			Tangshan
tangshan-21	67	male			28/01/2020	28/01/2020	tangshan-22	32	male			Tangshan	4/2/2020	4/2/2020	household	Tangshan Municipal Health Commussion	http://wsjkwyh.tangshan.gov.cn/	Du			Tangshan
tangshan-21	67	male			28/01/2020	28/01/2020	tangshan-30	45	male			Tangshan	9/2/2020	9/2/2020	no	Tangshan Municipal Health Commussion	http://wsjkwyh.tangshan.gov.cn/	Du			Tangshan
shijiazhuang-17	42	male			24/01/2020	24/01/2020	shijiazhuang-18	67	male			Shijiazhuang	30/01/2020	30/01/2020	household	The People_ Government of Siping Municipality	http://www.siping.gov.cn	Du			Guangzhou
xingtai-6	59	male			28/01/2020	28/01/2020	xingtai-15	34	female			Xingtai	1/2/2020	1/2/2020	household	Xingtai Municipal Health Commussion	http://wsjkw.xingtai.gov.cn	Du			Wuhan
cangzhou-1	80	male			9/1/2020	9/1/2020	cangzhou-2	59	male			Cangzhou	22/01/2020	22/01/2020	no	The People_ Government of Cangzhou Municipality	http://www.cangzhou.gov.cn	Du			Wuhan
cangzhou-1	80	male			9/1/2020	9/1/2020	cangzhou-10	41	male			Cangzhou	23/01/2020	23/01/2020	household	The People_ Government of Cangzhou Municipality	http://www.cangzhou.gov.cn	Du			Wuhan
cangzhou-1	80	male			9/1/2020	9/1/2020	cangzhou-11	61	male			Cangzhou	23/01/2020	23/01/2020	no	The People_ Government of Cangzhou Municipality	http://www.cangzhou.gov.cn	Du			Wuhan
cangzhou-1	80	male			9/1/2020	9/1/2020	cangzhou-12	62	male			Cangzhou	25/01/2020	25/01/2020	no	The People_ Government of Cangzhou Municipality	http://www.cangzhou.gov.cn	Du			Wuhan
cangzhou-13	29	female			23/01/2020	23/01/2020	cangzhou-14	85	female			Cangzhou	28/01/2020	28/01/2020	no	The People_ Government of Cangzhou Municipality	http://www.cangzhou.gov.cn	Du			Wuhan
cangzhou-1	80	male			9/1/2020	9/1/2020	cangzhou-15	72	female			Cangzhou	28/01/2020	28/01/2020	no	The People_ Government of Cangzhou Municipality	http://www.cangzhou.gov.cn	Du			Wuhan
cangzhou-7	38	male			25/01/2020	25/01/2020	cangzhou-16	49	female			Cangzhou	27/01/2020	27/01/2020	no	The People_ Government of Cangzhou Municipality	http://www.cangzhou.gov.cn	Du			Wuhan
cangzhou-3	31	male			24/01/2020	24/01/2020	cangzhou-20	30	male			Cangzhou	27/01/2020	27/01/2020	no	The People_ Government of Cangzhou Municipality	http://www.cangzhou.gov.cn	Du			Wuhan
cangzhou-1	80	male			9/1/2020	9/1/2020	cangzhou-23	51	female			Cangzhou	19/01/2020	19/01/2020	no	The People_ Government of Cangzhou Municipality	http://www.cangzhou.gov.cn	Du			Wuhan
cangzhou-1	80	male			9/1/2020	9/1/2020	cangzhou-24	62	female			Cangzhou	25/01/2020	25/01/2020	no	The People_ Government of Cangzhou Municipality	http://www.cangzhou.gov.cn	Du			Wuhan
tongren-1	50	female			14/01/2020	14/01/2020	tongren-2	17	male			Tongren	19/01/2020	19/01/2020	household	Tongren Municipal Health Commussion	http://wjw.trs.gov.cn	Du			Changsha
lanzhou-16	73	female			28/01/2020	28/01/2020	lanzhou-25	46	female			Lanzhou	5/2/2020	5/2/2020	no	Health Commussion of Gansu Province	http://wsjk.gansu.gov.cn/	Du			Lanzhou
lanzhou-19	51	female			21/01/2020	21/01/2020	lanzhou-26	29	male			Lanzhou	7/2/2020	7/2/2020	no	Health Commussion of Gansu Province	http://wsjk.gansu.gov.cn/	Du			Thailand
lanzhou-19	51	female			21/01/2020	21/01/2020	lanzhou-27	47	male			Lanzhou	6/2/2020	6/2/2020	no	Health Commussion of Gansu Province	http://wsjk.gansu.gov.cn/	Du			Thailand
gannan-1	60	male			28/01/2020	28/01/2020	gannan-7	53	female			Gannan	4/2/2020	4/2/2020	no	Gannan Tibetan Autonomous Prefecture Health Commission	http://wsjk.gnzrmzf.gov.cn	Du			Gannan
gannan-1	60	male			28/01/2020	28/01/2020	gannan-8	58	female			Gannan	13/02/2020	13/02/2020	household	Gannan Tibetan Autonomous Prefecture Health Commission	http://wsjk.gnzrmzf.gov.cn	Du			Gannan
pingliang-1	29	male			30/01/2020	30/01/2020	pingliang-2	27	female			Pingliang	1/2/2020	1/2/2020	household	Gansu Province Municipal Health Commussion	http://wjw.pingliang.gov.cn/	Du			Pingliang
pingliang-1	29	male			30/01/2020	30/01/2020	pingliang-7	54	male			Pingliang	10/2/2020	10/2/2020	no	Gansu Province Municipal Health Commussion	http://wjw.pingliang.gov.cn/	Du			Pingliang
pingliang-1	29	male			30/01/2020	30/01/2020	pingliang-8	34	female			Pingliang	10/2/2020	10/2/2020	no	Gansu Province Municipal Health Commussion	http://wjw.pingliang.gov.cn/	Du			Pingliang
tianshui-1	68	male			28/01/2020	28/01/2020	tianshui-9	68	male			Tianshui	26/01/2020	26/01/2020	no	Health Commussion of Gansu Province	http://wsjk.gansu.gov.cn	Du			Wuhan
tianshui-1	68	male			28/01/2020	28/01/2020	tianshui-10	55	female			Tianshui	29/01/2020	29/01/2020	no	Health Commussion of Gansu Province	http://wsjk.gansu.gov.cn	Du			Wuhan
huaian-6	33	male			22/01/2020	22/01/2020	huaian-8	32	female			Huaian	28/01/2020	28/01/2020	household	The People_ Government of Huaian Municipality	http://www.huaian.gov.cn	Du			Wuhan
huaian-2	49	male			19/01/2020	19/01/2020	huaian-9	50	male			Huaian	28/01/2020	28/01/2020	no	The People_ Government of Huaian Municipality	http://www.huaian.gov.cn	Du			Wuhan
huaian-2	49	male			19/01/2020	19/01/2020	huaian-10	71	female			Huaian	26/01/2020	26/01/2020	household	The People_ Government of Huaian Municipality	http://www.huaian.gov.cn	Du			Wuhan
huaian-2	49	male			19/01/2020	19/01/2020	huaian-11	76	male			Huaian	25/01/2020	25/01/2020	household	The People_ Government of Huaian Municipality	http://www.huaian.gov.cn	Du			Wuhan
huaian-2	49	male			19/01/2020	19/01/2020	huaian-15	31	male			Huaian	30/01/2020	30/01/2020	no	The People_ Government of Huaian Municipality	http://www.huaian.gov.cn	Du			Wuhan
huaian-2	49	male			19/01/2020	19/01/2020	huaian-16	50	male			Huaian	26/01/2020	26/01/2020	no	The People_ Government of Huaian Municipality	http://www.huaian.gov.cn	Du			Wuhan
huaian-19	60	male			27/01/2020	27/01/2020	huaian-22	30	female			Huaian	27/01/2020	27/01/2020	household	The People_ Government of Huaian Municipality	http://www.huaian.gov.cn	Du			Huaian
huaian-52	59	male			2/2/2020	2/2/2020	huaian-53	59	female			Huaian	7/2/2020	7/2/2020	household	The People_ Government of Huaian Municipality	http://www.huaian.gov.cn	Du			Huaian
nanjing-26	58	female			27/01/2020	27/01/2020	nanjing-27	72	female			Nanjing	1/2/2020	1/2/2020	no	Nanjing Municipal Health Commussion	http://wjw.nanjing.gov.cn/	Du			Nanjing
yancheng-8	59	female			24/01/2020	24/01/2020	yancheng-11	33	female			Wuhan	4/2/2020	4/2/2020	no	The People_ Government of Yancheng Municipality	http://www.yancheng.gov.cn	Du			Wuhan
yancheng-9	55	male			29/01/2020	29/01/2020	yancheng-13	56	female			Yancheng	31/01/2020	31/01/2020	Household	The People_ Government of Yancheng Municipality	http://www.yancheng.gov.cn	Du			Yancheng
wuxi-20	58	male			23/01/2020	23/01/2020	wuxi-21	31	female			Wuxi	25/01/2020	25/01/2020	Household	Wuxi Municipal Health Commussion	http://wjw.wuxi.gov.cn/	Du			Hubei
taizhou-20	53	male			30/01/2020	30/01/2020	taizhou-25	65	male			Taizhou	31/01/2020	31/01/2020	No	Taian Municipal Health Commussion	http://wjw.taian.gov.cn/	Du			Shiyan
taizhou-20	53	male			30/01/2020	30/01/2020	taizhou-26	41	male			Taizhou	30/01/2020	30/01/2020	No	Taian Municipal Health Commussion	http://wjw.taian.gov.cn/	Du			Shiyan
taizhou-20	53	male			30/01/2020	30/01/2020	taizhou-27	64	female			Taizhou	31/01/2020	31/01/2020	No	Taian Municipal Health Commussion	http://wjw.taian.gov.cn/	Du			Shiyan
taizhou-30	65	female			29/01/2020	29/01/2020	taizhou-32	42	female			Taizhou	2/2/2020	2/2/2020	Household	Taian Municipal Health Commussion	http://wjw.taian.gov.cn/	Du			Taizhou
taizhou-32	42	female			2/2/2020	2/2/2020	taizhou-33	45	male			Taizhou	3/2/2020	3/2/2020	Household	Taian Municipal Health Commussion	http://wjw.taian.gov.cn/	Du			Taizhou
nantong-4	57	female			27/01/2020	27/01/2020	nantong-11	80	female			Nantong	31/01/2020	31/01/2020	Household	Nantong Municipal Health Commussion	http://wjw.nantong.gov.cn/	Du			Wuhan
nantong-4	57	female			27/01/2020	27/01/2020	nantong-23	85	male			Nantong	6/2/2020	6/2/2020	No	Nantong Municipal Health Commussion	http://wjw.nantong.gov.cn/	Du			Wuhan
lianyungang-17	52	male			2/2/2020	2/2/2020	lianyungang-18	76	male			Lianyungang	3/2/2020	3/2/2020	No	Lianyungang Municipal People's Government	http://www.lyg.gov.cn/zglygzfmhwz/xxzx/xxzxRd.htm	Du			Lianyungang
lianyungang-17	52	male			2/2/2020	2/2/2020	lianyungang-19	53	female			Lianyungang	4/2/2020	4/2/2020	Household	Lianyungang Municipal People's Government	http://www.lyg.gov.cn/zglygzfmhwz/xxzx/xxzxRd.htm	Du			Lianyungang
lianyungang-17	52	male			2/2/2020	2/2/2020	lianyungang-26	66	male			Lianyungang	3/2/2020	3/2/2020	No	Lianyungang Municipal People's Government	http://www.lyg.gov.cn/zglygzfmhwz/xxzx/xxzxRd.htm	Du			Lianyungang
lianyungang-17	52	male			2/2/2020	2/2/2020	lianyungang-28	46	female			Lianyungang	31/01/2020	31/01/2020	No	Lianyungang Municipal People's Government	http://www.lyg.gov.cn/zglygzfmhwz/xxzx/xxzxRd.htm	Du			Lianyungang
lianyungang-17	52	male			2/2/2020	2/2/2020	lianyungang-29	32	female			Lianyungang	3/2/2020	3/2/2020	No	Lianyungang Municipal People's Government	http://www.lyg.gov.cn/zglygzfmhwz/xxzx/xxzxRd.htm	Du			Lianyungang
lianyungang-29	32	female			3/2/2020	3/2/2020	lianyungang-30	32	male			Lianyungang	6/2/2020	6/2/2020	No	Lianyungang Municipal People's Government	http://www.lyg.gov.cn/zglygzfmhwz/xxzx/xxzxRd.htm	Du			Lianyungang
yangzhou-1	47	female			21/01/2020	21/01/2020	yangzhou-9	23	female			Yangzhou	21/01/2020	21/01/2020	Household	Yangzhou Municipal Health Commussion	http://wjw.yangzhou.gov.cn/	Du			Wuhan
yangzhou-2	53	male			23/01/2020	23/01/2020	yangzhou-11	69	female			Yangzhou	1/2/2020	1/2/2020	No	Yangzhou Municipal Health Commussion	http://wjw.yangzhou.gov.cn/	Du			Wuhan
binzhou-11	49	female			27/01/2020	27/01/2020	binzhou-12	46	male			Binzhou	29/01/2020	29/01/2020	Household	Binzhou Municipal Health Commussion	http://wjw.binzhou.gov.cn/zhengwu/class/	Du			Binzhou
jinan-4	32	male			19/01/2020	19/01/2020	jinan-17	59	female			Jinan	30/01/2020	30/01/2020	Household	Jinan Municipal Health Commussion	http://jnmhc.jinan.gov.cn/col/col50360/index.html	Du			Wuhan
jinan-27	49	female			23/01/2020	23/01/2020	jinan-28	22	female			Jinan	26/01/2020	26/01/2020	Household	Jinan Municipal Health Commussion	http://jnmhc.jinan.gov.cn/col/col50360/index.html	Du			Jinan
jinan-26	39	female			23/01/2020	23/01/2020	jinan-37	66	female			Jinan	27/01/2020	27/01/2020	Household	Jinan Municipal Health Commussion	http://jnmhc.jinan.gov.cn/col/col50360/index.html	Du			Jinan
jinan-26	39	female			23/01/2020	23/01/2020	jinan-45	14	female			Jinan	5/2/2020	5/2/2020	Household	Jinan Municipal Health Commussion	http://jnmhc.jinan.gov.cn/col/col50360/index.html	Du			Jinan
qingdao-40	55	female			3/2/2020	3/2/2020	qingdao-43	21	female			Qingdao	5/2/2020	5/2/2020	Household	Qingdao Municipal Health Commussion	http://wsjsw.qingdao.gov.cn/	Du			Qingdao
liaocheng-4	32	male			26/01/2020	26/01/2020	liaocheng-8	53	female			Liaocheng	27/01/2020	27/01/2020	Household	Liaocheng Municipal Health Commussion	http://wjw.liaocheng.gov.cn/	Du			Wuhan
liaocheng-10	46	female			27/01/2020	27/01/2020	liaocheng-16	65	female			Liaocheng	31/01/2020	31/01/2020	Household	Liaocheng Municipal Health Commussion	http://wjw.liaocheng.gov.cn/	Du			Liaocheng
liaocheng-10	46	female			27/01/2020	27/01/2020	liaocheng-17	19	male			Liaocheng	29/01/2020	29/01/2020	Household	Liaocheng Municipal Health Commussion	http://wjw.liaocheng.gov.cn/	Du			Liaocheng
liaocheng-10	46	female			27/01/2020	27/01/2020	liaocheng-18	10	male			Liaocheng	29/01/2020	29/01/2020	Household	Liaocheng Municipal Health Commussion	http://wjw.liaocheng.gov.cn/	Du			Liaocheng
liaocheng-21	49	female			31/01/2020	31/01/2020	liaocheng-22	49	male			Liaocheng	5/2/2020	5/2/2020	No	Liaocheng Municipal Health Commussion	http://wjw.liaocheng.gov.cn/	Du			Liaocheng
liaocheng-19	43	male			31/01/2020	31/01/2020	liaocheng-30	68	female			Liaocheng	31/01/2020	31/01/2020	Household	Liaocheng Municipal Health Commussion	http://wjw.liaocheng.gov.cn/	Du			Liaocheng
liaocheng-19	43	male			31/01/2020	31/01/2020	liaocheng-31	72	male			Liaocheng	2/2/2020	2/2/2020	Household	Liaocheng Municipal Health Commussion	http://wjw.liaocheng.gov.cn/	Du			Liaocheng
linyi-9	41	male			19/01/2020	19/01/2020	linyi-10	38	female			Linyi	25/01/2020	25/01/2020	No	Linyi Municipal Health Commussion	http://wsjsw.linyi.gov.cn/	Du			Wuhan
rizhao-3	57	male			23/01/2020	23/01/2020	rizhao-10	64	male			sunshine	29/01/2020	29/01/2020	No	Rizhao Municipal Health Commussion	http://wsjkw.rizhao.gov.cn/	Du			Wuhan
rizhao-10	64	male			29/01/2020	29/01/2020	rizhao-12	56	female			sunshine	1/2/2020	1/2/2020	Household	Rizhao Municipal Health Commussion	http://wsjkw.rizhao.gov.cn/	Du			sunshine
rizhao-10	64	male			29/01/2020	29/01/2020	rizhao-16	42	male			sunshine	14/02/2020	14/02/2020	Household	Rizhao Municipal Health Commussion	http://wsjkw.rizhao.gov.cn/	Du			sunshine
weihai-13	51	male			23/01/2020	23/01/2020	weihai-15	53	male			Weihai	24/01/2020	24/01/2020	No	Weihai Municipal Health Commussion	http://wsjkw.weihai.gov.cn/	Du			Weihai
weihai-11	31	male			26/01/2020	26/01/2020	weihai-24	56	male			Weihai	28/01/2020	28/01/2020	Household	Weihai Municipal Health Commussion	http://wsjkw.weihai.gov.cn/	Du			Wuhan
weihai-18	46	female			25/01/2020	25/01/2020	weihai-25	86	male			Weihai	29/01/2020	29/01/2020	No	Weihai Municipal Health Commussion	http://wsjkw.weihai.gov.cn/	Du			Wuhan
weihai-13	51	male			23/01/2020	23/01/2020	weihai-29	50	female			Weihai	28/01/2020	28/01/2020	Household	Weihai Municipal Health Commussion	http://wsjkw.weihai.gov.cn/	Du			Weihai
weifang-26	58	male			1/2/2020	1/2/2020	weifang-38	48	female			Weifang	8/2/2020	8/2/2020	No	Weifang Municipal Health Commussion	http://wsjkw.weifang.gov.cn/	Du			Weifang
zaozhuang-3	34	male			22/01/2020	22/01/2020	zaozhuang-4	37	female			Zaozhuang	27/01/2020	27/01/2020	Household	Zaozhuang Municipal Health Commussion	http://wsjkw.zaozhuang.gov.cn/	Du			Wuhan
zaozhuang-3	34	male			22/01/2020	22/01/2020	zaozhuang-5	60	female			Zaozhuang	27/01/2020	27/01/2020	Household	Zaozhuang Municipal Health Commussion	http://wsjkw.zaozhuang.gov.cn/	Du			Wuhan
maoming-4	53	male			30/01/2020	30/01/2020	maoming-5	53	male			Xinyi	2/2/2020	2/2/2020	No	Maoming Municipal Health Commussion	http://wsjsj.maoming.gov.cn	Du			Suizhou
shaoguan-1	58	female			16/01/2020	16/01/2020	shaoguan-2	62	female			Shaoguan	19/01/2020	19/01/2020	No	Shaoguan Municipal Health Commussion	http://wsjk.sg.gov.cn	Du			Ezhou
zhongshan-45	68	male			28/01/2020	28/01/2020	zhongshan-48	52	male			Zhongshan	4/2/2020	4/2/2020	Household	Zhongshan Municipal Health Commussion	http://wjj.zs.gov.cn	Du			Wuhan
zhuhai-7	36	male			20/01/2020	20/01/2020	zhuhai-8	38	female			Zhuhai	20/01/2020	20/01/2020	Household	offical Weibo of Zhuhai municipal Health Bureau	https://weibo.com/u/3603732332	Du			Wuhan
zhuhai-38	37	female			26/01/2020	26/01/2020	zhuhai-39	67	female			Zhongshan	26/01/2020	26/01/2020	Household	offical Weibo of Zhuhai municipal Health Bureau	https://weibo.com/u/3603732332	Du			Wuhan
shenzhen-20	73	male			20/01/2020	20/01/2020	shenzhen-68	49	male			Shenzhen	24/01/2020	24/01/2020	No	Shenzhen Municipal Health Commussion	http://wjw.sz.gov.cn/	Du			Wuhan
shenzhen-20	73	male			20/01/2020	20/01/2020	shenzhen-69	49	female			Shenzhen	22/01/2020	22/01/2020	No	Shenzhen Municipal Health Commussion	http://wjw.sz.gov.cn/	Du			Wuhan
shenzhen-97	64	male			24/01/2020	24/01/2020	shenzhen-98	40	male			Shenzhen	24/01/2020	24/01/2020	No	Shenzhen Municipal Health Commussion	http://wjw.sz.gov.cn/	Du			Shiyan
shenzhen-76	30	female			22/01/2020	22/01/2020	shenzhen-108	38	female			Wuhan	28/01/2020	28/01/2020	No	Shenzhen Municipal Health Commussion	http://wjw.sz.gov.cn/	Du			Wuhan
shenzhen-12	69	male			12/1/2020	12/1/2020	shenzhen-188	25	female			Shenzhen	25/01/2020	25/01/2020	No	Shenzhen Municipal Health Commussion	http://wjw.sz.gov.cn/	Du			Wuhan
shenzhen-133	53	male			27/01/2020	27/01/2020	shenzhen-216	48	male			Shenzhen	25/01/2020	25/01/2020	No	Shenzhen Municipal Health Commussion	http://wjw.sz.gov.cn/	Du			Wuhan
shenzhen-183	29	male			28/01/2020	28/01/2020	shenzhen-224	50	male			Tianmen	25/01/2020	25/01/2020	Household	Shenzhen Municipal Health Commussion	http://wjw.sz.gov.cn/	Du			Wuhan
shenzhen-183	29	male			28/01/2020	28/01/2020	shenzhen-225	50	female			Tianmen	25/01/2020	25/01/2020	Household	Shenzhen Municipal Health Commussion	http://wjw.sz.gov.cn/	Du			Wuhan
shenzhen-210	36	male			26/01/2020	26/01/2020	shenzhen-237	31	female			Shenzhen	23/01/2020	23/01/2020	Household	Shenzhen Municipal Health Commussion	http://wjw.sz.gov.cn/	Du			Macao
shenzhen-133	51	male			24/01/2020	24/01/2020	shenzhen-255	34	male			Shenzhen	26/01/2020	26/01/2020	No	Shenzhen Municipal Health Commussion	http://wjw.sz.gov.cn/	Du			Shenzhen
shenzhen-255	34	male			26/01/2020	26/01/2020	shenzhen-261	34	female			Shenzhen	28/01/2020	28/01/2020	Household	Shenzhen Municipal Health Commussion	http://wjw.sz.gov.cn/	Du			Shenzhen
shenzhen-255	34	male			26/01/2020	26/01/2020	shenzhen-264	4	female			Shenzhen	28/01/2020	28/01/2020	Household	Shenzhen Municipal Health Commussion	http://wjw.sz.gov.cn/	Du			Shenzhen
shenzhen-255	34	male			26/01/2020	26/01/2020	shenzhen-267	50	female			Shenzhen	30/01/2020	30/01/2020	Household	Shenzhen Municipal Health Commussion	http://wjw.sz.gov.cn/	Du			Shenzhen
shenzhen-89	64	female			17/01/2020	17/01/2020	shenzhen-275	37	female			Shenzhen	28/01/2020	28/01/2020	Household	Shenzhen Municipal Health Commussion	http://wjw.sz.gov.cn/	Du			Wuhan
shenzhen-141	78	male			26/01/2020	26/01/2020	shenzhen-283	78	female			Shenzhen	30/01/2020	30/01/2020	Household	Shenzhen Municipal Health Commussion	http://wjw.sz.gov.cn/	Du			Wuhan
shenzhen-171	66	male			29/01/2020	29/01/2020	shenzhen-323	60	female			Shenzhen	5/2/2020	5/2/2020	Household	Shenzhen Municipal Health Commussion	http://wjw.sz.gov.cn/	Du			Shenzhen
shenzhen-394	42	female			10/2/2020	10/2/2020	shenzhen-335	66	female			Shenzhen	2/2/2020	2/2/2020	Household	Shenzhen Municipal Health Commussion	http://wjw.sz.gov.cn/	Du			Shenzhen
shenzhen-347	54	male			3/2/2020	3/2/2020	shenzhen-384	22	male			Shenzhen	6/2/2020	6/2/2020	No	Shenzhen Municipal Health Commussion	http://wjw.sz.gov.cn/	Du			Wuhan
shenzhen-235	58	female			29/01/2020	29/01/2020	shenzhen-392	25	male			Shenzhen	11/2/2020	11/2/2020	No	Shenzhen Municipal Health Commussion	http://wjw.sz.gov.cn/	Du			Wuhan
shenzhen-235	58	female			29/01/2020	29/01/2020	shenzhen-395	58	female			Shenzhen	7/2/2020	7/2/2020	No	Shenzhen Municipal Health Commussion	http://wjw.sz.gov.cn/	Du			Wuhan
shenzhen-415	69	male			9/2/2020	9/2/2020	shenzhen-397	49	male			Shenzhen	10/2/2020	10/2/2020	Household	Shenzhen Municipal Health Commussion	http://wjw.sz.gov.cn/	Du			Wuhan
shenzhen-133	51	male			24/01/2020	24/01/2020	shenzhen-398	56	male			Shenzhen	1/2/2020	1/2/2020	No	Shenzhen Municipal Health Commussion	http://wjw.sz.gov.cn/	Du			Shenzhen
shenzhen-382	69	male			9/2/2020	9/2/2020	shenzhen-407	37	female			Yellowstone	9/2/2020	9/2/2020	No	Shenzhen Municipal Health Commussion	http://wjw.sz.gov.cn/	Du			Yellowstone
shenzhen-171	66	male			29/01/2020	29/01/2020	shenzhen-408	38	female			Shenzhen	30/01/2020	30/01/2020	Household	Shenzhen Municipal Health Commussion	http://wjw.sz.gov.cn/	Du			Shenzhen
xian-21	49	female			24/01/2020	24/01/2020	xian-48	47	female			Xi'an	25/01/2020	25/01/2020	No	Shanxi Province Municipal Health Commussion	http://sxwjw.shaanxi.gov.cn/	Du			Shanghai
xian-13	66	male			18/01/2020	18/01/2020	xian-52	35	female			Xi'an	25/01/2020	25/01/2020	No	Shanxi Province Municipal Health Commussion	http://sxwjw.shaanxi.gov.cn/	Du			Xi'an
xian-49	54	male			30/01/2020	30/01/2020	xian-60	53	female			Xi'an	1/2/2020	1/2/2020	Household	Shanxi Province Municipal Health Commussion	http://sxwjw.shaanxi.gov.cn/	Du			Xi'an
xian-37	40	male			28/01/2020	28/01/2020	xian-64	33	male			Xi'an	24/01/2020	24/01/2020	No	Shanxi Province Municipal Health Commussion	http://sxwjw.shaanxi.gov.cn/	Du			Wuhan
xian-67	47	male			23/01/2020	23/01/2020	xian-68	43	female			Xi'an	28/01/2020	28/01/2020	Household	Shanxi Province Municipal Health Commussion	http://sxwjw.shaanxi.gov.cn/	Du			Xi'an
xian-63	66	male			1/2/2020	1/2/2020	xian-80	69	female			Xi'an	4/2/2020	4/2/2020	Household	Shanxi Province Municipal Health Commussion	http://sxwjw.shaanxi.gov.cn/	Du			Xi'an
xian-107	42	male			1/2/2020	1/2/2020	xian-85	66	female			Xi'an	1/2/2020	1/2/2020	No	Shanxi Province Municipal Health Commussion	http://sxwjw.shaanxi.gov.cn/	Du			Yellowstone
xian-83	57	female			27/01/2020	27/01/2020	xian-90	50	male			Huayin	5/2/2020	5/2/2020	No	Shanxi Province Municipal Health Commussion	http://sxwjw.shaanxi.gov.cn/	Du			Xi'an
xian-13	66	male			18/01/2020	18/01/2020	xian-91	43	male			Xi'an	3/2/2020	3/2/2020	No	Shanxi Province Municipal Health Commussion	http://sxwjw.shaanxi.gov.cn/	Du			Xi'an
xian-83	57	female			27/01/2020	27/01/2020	xian-97	70	female			Xi'an	25/01/2020	25/01/2020	No	Shanxi Province Municipal Health Commussion	http://sxwjw.shaanxi.gov.cn/	Du			Xi'an
xian-13	66	male			18/01/2020	18/01/2020	xian-98	81	male			Xi'an	20/01/2020	20/01/2020	No	Shanxi Province Municipal Health Commussion	http://sxwjw.shaanxi.gov.cn/	Du			Xi'an
xian-44	50	female			31/01/2020	31/01/2020	xian-102	26	male			Xi'an	3/2/2020	3/2/2020	Household	Shanxi Province Municipal Health Commussion	http://sxwjw.shaanxi.gov.cn/	Du			Xi'an
xian-44	50	female			31/01/2020	31/01/2020	xian-111	50	male			Xi'an	28/01/2020	28/01/2020	No	Shanxi Province Municipal Health Commussion	http://sxwjw.shaanxi.gov.cn/	Du			Xi'an
xian-86	31	female			31/01/2020	31/01/2020	xian-113	81	female			Xi'an	6/2/2020	6/2/2020	No	Shanxi Province Municipal Health Commussion	http://sxwjw.shaanxi.gov.cn/	Du			Xi'an
yulin-3	27	female			22/01/2020	22/01/2020	yulin-2	60	male			Yulin	28/01/2020	28/01/2020	Household	The People_ Government of Yulin Municipality	http://www.yl.gov.cn	Du			Wuhan
baoji-2	46	female			18/01/2020	18/01/2020	baoji-3	50	male			Baoji	22/01/2020	22/01/2020	Household	Baoji Municipal Health Commussion	http://wjw.baoji.gov.cn	Du			Baoji
baoji-8	39	male			28/01/2020	28/01/2020	baoji-7	64	male			Baoji	29/01/2020	29/01/2020	No	Baoji Municipal Health Commussion	http://wjw.baoji.gov.cn	Du			Wuhan
baoji-8	39	male			28/01/2020	28/01/2020	baoji-9	56	male			Baoji	21/01/2020	21/01/2020	No	Baoji Municipal Health Commussion	http://wjw.baoji.gov.cn	Du			Wuhan
baoji-7	64	male			29/01/2020	29/01/2020	baoji-12	71	male			Baoji	3/2/2020	3/2/2020	No	Baoji Municipal Health Commussion	http://wjw.baoji.gov.cn	Du			Baoji
shangluo-6	25	male			7/2/2020	7/2/2020	shangluo-4	49	male			Shangluo	27/01/2020	27/01/2020	Household	Shanxi Province Municipal Health Commussion	http://sxwjw.shaanxi.gov.cn/	Du			Wuhan
hanzhong-20	46	male			26/01/2020	26/01/2020	hanzhong-21	71	male			Hanzhong	31/01/2020	31/01/2020	Household	Shanxi Province Municipal Health Commussion	http://sxwjw.shaanxi.gov.cn/	Du			Ningbo
tongchuan-1	46	male			23/01/2020	23/01/2020	tongchuan-6	74	male			Tongchuan	27/01/2020	27/01/2020	No	Shanxi Province Municipal Health Commussion	http://sxwjw.shaanxi.gov.cn/	Du			Wuhan
changchun-3	28	male			22/01/2020	22/01/2020	changchun-4	26	female			Shuangliao	23/01/2020	23/01/2020	Household	Changchun Municipal Health Commussion	http://wjw.changchun.gov.cn	Du			Wuhan
siping-5	29	male			28/01/2020	28/01/2020	siping-6	56	male			Siping	30/01/2020	30/01/2020	No	The People_ Government of Siping Municipality	http://www.siping.gov.cn	Du			Siping
liaoyuan-1	60	male			25/01/2020	25/01/2020	liaoyuan-4	47	male			Liaoyuan	31/01/2020	31/01/2020	Household	Liaoyuan Municipal Health Commussion	http://wjw.liaoyuan.gov.cn	Du			Wuhan
liaoyuan-1	60	male			25/01/2020	25/01/2020	liaoyuan-5	7	female			Liaoyuan	2/2/2020	2/2/2020	Household	Liaoyuan Municipal Health Commussion	http://wjw.liaoyuan.gov.cn	Du			Wuhan
liaoyuan-1	60	male			25/01/2020	25/01/2020	liaoyuan-7	50	male			Liaoyuan	8/2/2020	8/2/2020	No	Liaoyuan Municipal Health Commussion	http://wjw.liaoyuan.gov.cn	Du			Wuhan
bazhong-16	45	male			29/01/2020	29/01/2020	bazhong-26	18	female			Bazhong	13/02/2020	13/02/2020	Household	Bazhong Municipal Health Commussion	http://wsjkw.cnbz.gov.cn/index.html	Du			Wuhan
deyang-2	47	female			27/01/2020	27/01/2020	deyang-6	47	male			Mianzhu	29/01/2020	29/01/2020	Household	Deyang Municipal Health Commussion	https://wjw.deyang.gov.cn/	Du			Wuhan
deyang-2	47	female			27/01/2020	27/01/2020	deyang-7	44	female			Mianzhu	29/01/2020	29/01/2020	No	Deyang Municipal Health Commussion	https://wjw.deyang.gov.cn/	Du			Wuhan
deyang-2	47	female			27/01/2020	27/01/2020	deyang-9	66	female			Mianzhu	31/01/2020	31/01/2020	Household	Deyang Municipal Health Commussion	https://wjw.deyang.gov.cn/	Du			Wuhan
deyang-3	53	male			28/01/2020	28/01/2020	deyang-11	44	male			Deyang	30/01/2020	30/01/2020	No	Deyang Municipal Health Commussion	https://wjw.deyang.gov.cn/	Du			Wuhan
deyang-10	29	female			31/01/2020	31/01/2020	deyang-13	31	male			Jingzhou	7/2/2020	7/2/2020	Household	Deyang Municipal Health Commussion	https://wjw.deyang.gov.cn/	Du			Jingzhou
deyang-2	47	female			27/01/2020	27/01/2020	deyang-14	45	male			Mianzhu	2/2/2020	2/2/2020	No	Deyang Municipal Health Commussion	https://wjw.deyang.gov.cn/	Du			Wuhan
leshan-2	32	male			25/01/2020	25/01/2020	leshan-3	49	female			Leshan	5/2/2020	5/2/2020	No	Leshan Municipal Health Commussion	http://swjj.leshan.gov.cn	Du			Wuhan
meishan-5	50	female			25/01/2020	25/01/2020	meishan-4	57	male			Meishan	27/01/2020	27/01/2020	No	The People_ Government of Meishan Municipality	http://www.ms.gov.cn	Du			Meishan
meishan-6	56	female			26/01/2020	26/01/2020	meishan-7	63	male			Meishan	26/01/2020	26/01/2020	Household	The People_ Government of Meishan Municipality	http://www.ms.gov.cn	Du			No information
nanchong-10	59	male			29/01/2020	29/01/2020	nanchong-28	35	female			Nanchong	2/2/2020	2/2/2020	No	Nanchong Municipal Health Commussion	http://wsjsw.nanchong.gov.cn	Du			No information
neijiang-1	44	female			23/01/2020	23/01/2020	neijiang-2	47	male			Neijiang	25/01/2020	25/01/2020	No	Neijiang Municipal Health Commussion	http://wsj.neijiang.gov.cn/	Du			Wuhan
neijiang-1	44	female			23/01/2020	23/01/2020	neijiang-3	16	male			Neijiang	25/01/2020	25/01/2020	No	Neijiang Municipal Health Commussion	http://wsj.neijiang.gov.cn/	Du			Wuhan
neijiang-6	36	male			29/01/2020	29/01/2020	neijiang-11	33	male			Neijiang	31/01/2020	31/01/2020	No	Neijiang Municipal Health Commussion	http://wsj.neijiang.gov.cn/	Du			Wuhan
neijiang-6	36	male			29/01/2020	29/01/2020	neijiang-13	36	male			Neijiang	3/2/2020	3/2/2020	No	Neijiang Municipal Health Commussion	http://wsj.neijiang.gov.cn/	Du			Wuhan
neijiang-6	36	male			29/01/2020	29/01/2020	neijiang-14	34	female			Neijiang	3/2/2020	3/2/2020	No	Neijiang Municipal Health Commussion	http://wsj.neijiang.gov.cn/	Du			Wuhan
neijiang-1	44	female			23/01/2020	23/01/2020	neijiang-21	22	female			Neijiang	11/2/2020	11/2/2020	No	Neijiang Municipal Health Commussion	http://wsj.neijiang.gov.cn/	Du			Wuhan
panzhihua-2	49	male			29/01/2020	29/01/2020	panzhihua-9	54	male			Panzhihua	31/01/2020	31/01/2020	No	Panzhihua Municipal Health Commussion	http://wjw.panzhihua.gov.cn/	Du			No information
panzhihua-2	49	male			29/01/2020	29/01/2020	panzhihua-10	22	male			Panzhihua	30/01/2020	30/01/2020	No	Panzhihua Municipal Health Commussion	http://wjw.panzhihua.gov.cn/	Du			No information
panzhihua-2	49	male			29/01/2020	29/01/2020	panzhihua-11	78	female			Panzhihua	3/2/2020	3/2/2020	No	Panzhihua Municipal Health Commussion	http://wjw.panzhihua.gov.cn/	Du			No information
tianjin-27	35	male			28/01/2020	28/01/2020	tianjin-63	66	male			Tianjin	1/2/2020	1/2/2020	Household	Tianjin Municipal Health Commussion	http://wsjk.tj.gov.cn/	Du			Tianjin
tianjin-70	34	male			22/01/2020	22/01/2020	tianjin-88	42	male			Tianjin	28/01/2020	28/01/2020	No	Tianjin Municipal Health Commussion	http://wsjk.tj.gov.cn/	Du			Tianjin
tianjin-95	49	male			1/2/2020	1/2/2020	tianjin-101	50	female			Tianjin	1/2/2020	1/2/2020	Household	Tianjin Municipal Health Commussion	http://wsjk.tj.gov.cn/	Du			Tianjin
tianjin-95	49	male			1/2/2020	1/2/2020	tianjin-116	42	male			Tianjin	10/2/2020	10/2/2020	No	Tianjin Municipal Health Commussion	http://wsjk.tj.gov.cn/	Du			Tianjin
tianjin-17	49	male			26/01/2020	26/01/2020	tianjin-33	48	female			Tianjin	30/01/2020	30/01/2020	No	Tianjin Municipal Health Commussion	http://wsjk.tj.gov.cn/	Du			Tianjin
tianjin-103	56	male			9/2/2020	9/2/2020	tianjin-105	53	male			Tianjin	10/2/2020	10/2/2020	No	Tianjin Municipal Health Commussion	http://wsjk.tj.gov.cn/	Du			Tianjin
tianjin-34	52	female			27/01/2020	27/01/2020	tianjin-36	53	male			Tianjin	28/01/2020	28/01/2020	No	Tianjin Municipal Health Commussion	http://wsjk.tj.gov.cn/	Du			Tianjin
tianjin-50	66	female			2/2/2020	2/2/2020	tianjin-52	37	female			Tianjin	30/01/2020	30/01/2020	No	Tianjin Municipal Health Commussion	http://wsjk.tj.gov.cn/	Du			Tianjin
tianjin-51	36	female			27/01/2020	27/01/2020	tianjin-64	31	male			Tianjin	1/2/2020	1/2/2020	No	Tianjin Municipal Health Commussion	http://wsjk.tj.gov.cn/	Du			Tianjin
tianjin-37	43	female			25/01/2020	25/01/2020	tianjin-71	55	male			Tianjin	30/01/2020	30/01/2020	No	Tianjin Municipal Health Commussion	http://wsjk.tj.gov.cn/	Du			Beijing
tianjin-72	65	female			1/2/2020	1/2/2020	tianjin-81	65	male			Tianjin	31/01/2020	31/01/2020	No	Tianjin Municipal Health Commussion	http://wsjk.tj.gov.cn/	Du			Tianjin
tianjin-43	35	female			21/01/2020	21/01/2020	tianjin-84	36	male			Tianjin	4/2/2020	4/2/2020	Household	Tianjin Municipal Health Commussion	http://wsjk.tj.gov.cn/	Du			Tianjin
tianjin-82	47	male			3/2/2020	3/2/2020	tianjin-91	21	male			Tianjin	5/2/2020	5/2/2020	Household	Tianjin Municipal Health Commussion	http://wsjk.tj.gov.cn/	Du			Tianjin
tianjin-37	43	female			25/01/2020	25/01/2020	tianjin-92	63	female			Tianjin	30/01/2020	30/01/2020	No	Tianjin Municipal Health Commussion	http://wsjk.tj.gov.cn/	Du			Beijing
tianjin-75	45	male			2/2/2020	2/2/2020	tianjin-94	22	female			Tianjin	6/2/2020	6/2/2020	Household	Tianjin Municipal Health Commussion	http://wsjk.tj.gov.cn/	Du			Tianjin
tianjin-93	50	female			7/2/2020	7/2/2020	tianjin-107	49	male			Tianjin	5/2/2020	5/2/2020	Household	Tianjin Municipal Health Commussion	http://wsjk.tj.gov.cn/	Du			Tianjin
tianjin-41	21	female			31/01/2020	31/01/2020	tianjin-121	31	male			Tianjin	12/2/2020	12/2/2020	Household	Tianjin Municipal Health Commussion	http://wsjk.tj.gov.cn/	Du			Wenzhou
yinchuan-5	47	female			19/01/2020	19/01/2020	yinchuan-14	54	male			Yinchuan	27/01/2020	27/01/2020	Household	Yinchuan Municipal Health Commussion	http://wjw.yinchuan.gov.cn	Du			No information
wuzhong-1	42	male			17/01/2020	17/01/2020	wuzhong-2	61	female			Wu Zhong	24/01/2020	24/01/2020	Household	The People_ Government of Wuzhong Municipality	http://www.wuzhong.gov.cn/ztzl/ztlb/jtjgczl/wsjhj/	Du			Wuhan
fuyang-7	21	female			18/01/2020	18/01/2020	fuyang-19	27	female			Wuhan	29/01/2020	29/01/2020	No	Fuyang Municipal Health Commussion	http://wjw.fy.gov.cn/	Du			Wuhan
fuyang-15	44	male			20/01/2020	20/01/2020	fuyang-28	45	female			Fuyang	26/01/2020	26/01/2020	Household	Fuyang Municipal Health Commussion	http://wjw.fy.gov.cn/	Du			Fuyang
fuyang-15	44	male			20/01/2020	20/01/2020	fuyang-29	20	female			Fuyang	25/01/2020	25/01/2020	Household	Fuyang Municipal Health Commussion	http://wjw.fy.gov.cn/	Du			Fuyang
fuyang-55	49	male			28/01/2020	28/01/2020	fuyang-56	47	female			Fuyang	25/01/2020	25/01/2020	Household	Fuyang Municipal Health Commussion	http://wjw.fy.gov.cn/	Du			Xiaoshan
fuyang-28	45	female			26/01/2020	26/01/2020	fuyang-61	55	male			Fuyang	28/01/2020	28/01/2020	No	Fuyang Municipal Health Commussion	http://wjw.fy.gov.cn/	Du			Fuyang
fuyang-15	44	male			20/01/2020	20/01/2020	fuyang-72	25	male			Fuyang	31/01/2020	31/01/2020	No	Fuyang Municipal Health Commussion	http://wjw.fy.gov.cn/	Du			Fuyang
fuyang-71	47	male			28/01/2020	28/01/2020	fuyang-78	46	female			Wuhan	27/01/2020	27/01/2020	Household	Fuyang Municipal Health Commussion	http://wjw.fy.gov.cn/	Du			Wuhan
fuyang-66	66	male			27/01/2020	27/01/2020	fuyang-79	44	female			Fuyang	28/01/2020	28/01/2020	Household	Fuyang Municipal Health Commussion	http://wjw.fy.gov.cn/	Du			Fuyang
fuyang-55	49	male			28/01/2020	28/01/2020	fuyang-83	47	female			Fuyang	6/2/2020	6/2/2020	No	Fuyang Municipal Health Commussion	http://wjw.fy.gov.cn/	Du			Xiaoshan
fuyang-79	44	female			28/01/2020	28/01/2020	fuyang-84	45	male			Fuyang	4/2/2020	4/2/2020	Household	Fuyang Municipal Health Commussion	http://wjw.fy.gov.cn/	Du			Fuyang
fuyang-101	44	male			30/01/2020	30/01/2020	fuyang-89	69	male			Fuyang	30/01/2020	30/01/2020	Household	Fuyang Municipal Health Commussion	http://wjw.fy.gov.cn/	Du			Xi'an
fuyang-60	38	female			23/01/2020	23/01/2020	fuyang-94	16	male			Fuyang	6/2/2020	6/2/2020	Household	Fuyang Municipal Health Commussion	http://wjw.fy.gov.cn/	Du			Wuhan
fuyang-62	68	female			23/01/2020	23/01/2020	fuyang-95	54	female			Fuyang	7/2/2020	7/2/2020	Household	Fuyang Municipal Health Commussion	http://wjw.fy.gov.cn/	Du			Fuyang
fuyang-74	42	male			30/01/2020	30/01/2020	fuyang-96	25	female			Fuyang	4/2/2020	4/2/2020	Household	Fuyang Municipal Health Commussion	http://wjw.fy.gov.cn/	Du			Fuyang
fuyang-71	47	male			28/01/2020	28/01/2020	fuyang-78	46	female			Wuhan	27/01/2020	27/01/2020	Household	Fuyang Municipal Health Commussion	http://wjw.fy.gov.cn/	Du			Wuhan
fuyang-66	66	male			27/01/2020	27/01/2020	fuyang-79	44	female			Fuyang	28/01/2020	28/01/2020	Household	Fuyang Municipal Health Commussion	http://wjw.fy.gov.cn/	Du			Fuyang
fuyang-55	49	male			28/01/2020	28/01/2020	fuyang-83	47	female			Fuyang	6/2/2020	6/2/2020	No	Fuyang Municipal Health Commussion	http://wjw.fy.gov.cn/	Du			Xiaoshan
fuyang-79	44	female			28/01/2020	28/01/2020	fuyang-84	45	male			Fuyang	4/2/2020	4/2/2020	Household	Fuyang Municipal Health Commussion	http://wjw.fy.gov.cn/	Du			Fuyang
fuyang-73	45	male			5/2/2020	5/2/2020	fuyang-93	58	female			Fuyang	5/2/2020	5/2/2020	No	Fuyang Municipal Health Commussion	http://wjw.fy.gov.cn/	Du			No information
fuyang-60	38	female			23/01/2020	23/01/2020	fuyang-94	16	male			Fuyang	6/2/2020	6/2/2020	Household	Fuyang Municipal Health Commussion	http://wjw.fy.gov.cn/	Du			Wuhan
fuyang-74	42	male			30/01/2020	30/01/2020	fuyang-96	25	female			Fuyang	4/2/2020	4/2/2020	Household	Fuyang Municipal Health Commussion	http://wjw.fy.gov.cn/	Du			Fuyang
fuyang-111	39	male			11/2/2020	11/2/2020	fuyang-109	63	male			Fuyang	7/2/2020	7/2/2020	Household	Fuyang Municipal Health Commussion	http://wjw.fy.gov.cn/	Du			Wuhan
fuyang-68	56	female			29/01/2020	29/01/2020	fuyang-113	58	male			Fuyang	11/2/2020	11/2/2020	Household	Fuyang Municipal Health Commussion	http://wjw.fy.gov.cn/	Du			Fuyang
xinyang-6	46	male			18/01/2020	18/01/2020	xinyang-7	80	female			Xinyang	19/01/2020	19/01/2020	Household	Xinyang Municipal Health Commussion	http://www.hnxywjw.gov.cn/	Du			Wuhan
xinyang-6	46	male			18/01/2020	18/01/2020	xinyang-8	46	female			Xinyang	23/01/2020	23/01/2020	Household	Xinyang Municipal Health Commussion	http://www.hnxywjw.gov.cn/	Du			Wuhan
xinyang-6	46	male			18/01/2020	18/01/2020	xinyang-9	45	female			Xinyang	22/01/2020	22/01/2020	Household	Xinyang Municipal Health Commussion	http://www.hnxywjw.gov.cn/	Du			Wuhan
xinyang-11	52	male			18/01/2020	18/01/2020	xinyang-55	52	female			Xinyang	23/01/2020	23/01/2020	Household	Xinyang Municipal Health Commussion	http://www.hnxywjw.gov.cn/	Du			Xinyang
xinyang-35	56	female			21/01/2020	21/01/2020	xinyang-79	29	male			Xinyang	20/01/2020	20/01/2020	Household	Xinyang Municipal Health Commussion	http://www.hnxywjw.gov.cn/	Du			Wuhan
xinyang-6	46	male			18/01/2020	18/01/2020	xinyang-100	57	male			Xinyang	29/01/2020	29/01/2020	No	Xinyang Municipal Health Commussion	http://www.hnxywjw.gov.cn/	Du			Wuhan
xinyang-74	28	female			23/01/2020	23/01/2020	xinyang-115	54	male			Xinyang	29/01/2020	29/01/2020	No	Xinyang Municipal Health Commussion	http://www.hnxywjw.gov.cn/	Du			Wuhan
xinyang-73	53	male			19/01/2020	19/01/2020	xinyang-117	28	female			Xinyang	22/01/2020	22/01/2020	No	Xinyang Municipal Health Commussion	http://www.hnxywjw.gov.cn/	Du			Xinyang
xinyang-117	28	female			22/01/2020	22/01/2020	xinyang-118	52	female			Xinyang	30/01/2020	30/01/2020	Household	Xinyang Municipal Health Commussion	http://www.hnxywjw.gov.cn/	Du			Xinyang
xinyang-11	52	male			18/01/2020	18/01/2020	xinyang-121	44	male			Xinyang	28/01/2020	28/01/2020	No	Xinyang Municipal Health Commussion	http://www.hnxywjw.gov.cn/	Du			Xinyang
xinyang-11	52	male			18/01/2020	18/01/2020	xinyang-122	50	female			Xinyang	26/01/2020	26/01/2020	No	Xinyang Municipal Health Commussion	http://www.hnxywjw.gov.cn/	Du			Xinyang
xinyang-65	30	male			24/01/2020	24/01/2020	xinyang-136	56	male			Xinyang	2/2/2020	2/2/2020	Household	Xinyang Municipal Health Commussion	http://www.hnxywjw.gov.cn/	Du			Wuhan
xinyang-50	27	male			27/01/2020	27/01/2020	xinyang-140	0	male			Xinyang	4/2/2020	4/2/2020	Household	Xinyang Municipal Health Commussion	http://www.hnxywjw.gov.cn/	Du			Wuhan
xinyang-50	27	male			27/01/2020	27/01/2020	xinyang-141	52	female			Xinyang	1/2/2020	1/2/2020	No	Xinyang Municipal Health Commussion	http://www.hnxywjw.gov.cn/	Du			Wuhan
xinyang-9	45	female			22/01/2020	22/01/2020	xinyang-143	19	female			Xinyang	26/01/2020	26/01/2020	Household	Xinyang Municipal Health Commussion	http://www.hnxywjw.gov.cn/	Du			Xinyang
xinyang-73	53	male			19/01/2020	19/01/2020	xinyang-180	48	male			Xinyang	3/2/2020	3/2/2020	No	Xinyang Municipal Health Commussion	http://www.hnxywjw.gov.cn/	Du			Xinyang
xinyang-60	61	male			26/01/2020	26/01/2020	xinyang-181	60	female			Xinyang	30/01/2020	30/01/2020	Household	Xinyang Municipal Health Commussion	http://www.hnxywjw.gov.cn/	Du			Wuhan
xinyang-60	61	male			26/01/2020	26/01/2020	xinyang-182	32	male			Xinyang	27/01/2020	27/01/2020	No	Xinyang Municipal Health Commussion	http://www.hnxywjw.gov.cn/	Du			Wuhan
xinyang-33	18	female			20/01/2020	20/01/2020	xinyang-187	69	female			Xinyang	1/2/2020	1/2/2020	No	Xinyang Municipal Health Commussion	http://www.hnxywjw.gov.cn/	Du			Wuhan
xinyang-104	51	male			26/01/2020	26/01/2020	xinyang-192	79	female			Xinyang	4/2/2020	4/2/2020	Household	Xinyang Municipal Health Commussion	http://www.hnxywjw.gov.cn/	Du			Xinyang
xinyang-159	61	male			27/01/2020	27/01/2020	xinyang-210	64	female			Xinyang	6/2/2020	6/2/2020	No	Xinyang Municipal Health Commussion	http://www.hnxywjw.gov.cn/	Du			Xinyang
xinyang-109	45	female			27/01/2020	27/01/2020	xinyang-217	18	male			Xinyang	2/2/2020	2/2/2020	No	Xinyang Municipal Health Commussion	http://www.hnxywjw.gov.cn/	Du			Wuhan
xinyang-158	31	male			2/2/2020	2/2/2020	xinyang-218	17	female			Xinyang	4/2/2020	4/2/2020	No	Xinyang Municipal Health Commussion	http://www.hnxywjw.gov.cn/	Du			Xinyang
xinyang-89	46	female			24/01/2020	24/01/2020	xinyang-221	53	male			Xinyang	1/2/2020	1/2/2020	No	Xinyang Municipal Health Commussion	http://www.hnxywjw.gov.cn/	Du			Wuhan
xinyang-220	45	male			3/2/2020	3/2/2020	xinyang-225	43	female			Xinyang	5/2/2020	5/2/2020	Household	Xinyang Municipal Health Commussion	http://www.hnxywjw.gov.cn/	Du			Guangzhou
xinyang-39	54	male			16/01/2020	16/01/2020	xinyang-227	51	male			Xinyang	25/01/2020	25/01/2020	No	Xinyang Municipal Health Commussion	http://www.hnxywjw.gov.cn/	Du			Xinyang
xinyang-205	56	male			25/01/2020	25/01/2020	xinyang-236	54	female			Xinyang	11/2/2020	11/2/2020	No	Xinyang Municipal Health Commussion	http://www.hnxywjw.gov.cn/	Du			Xinyang
xinyang-209	36	male			1/2/2020	1/2/2020	xinyang-241	62	male			Xinyang	9/2/2020	9/2/2020	No	Xinyang Municipal Health Commussion	http://www.hnxywjw.gov.cn/	Du			Xinyang
xinyang-171	62	female			29/01/2020	29/01/2020	xinyang-242	62	male			Xinyang	7/2/2020	7/2/2020	Household	Xinyang Municipal Health Commussion	http://www.hnxywjw.gov.cn/	Du			Wuhan
xinyang-56	71	male			25/01/2020	25/01/2020	xinyang-245	47	male			Xinyang	1/2/2020	1/2/2020	Household	Xinyang Municipal Health Commussion	http://www.hnxywjw.gov.cn/	Du			Xinyang
xinyang-237	56	female			1/2/2020	1/2/2020	xinyang-248	57	male			Xinyang	27/01/2020	27/01/2020	No	Xinyang Municipal Health Commussion	http://www.hnxywjw.gov.cn/	Du			Xinyang
xinyang-211	56	male			27/01/2020	27/01/2020	xinyang-250	55	female			Xinyang	24/01/2020	24/01/2020	Household	Xinyang Municipal Health Commussion	http://www.hnxywjw.gov.cn/	Du			Xinyang
xinyang-200	55	male			25/01/2020	25/01/2020	xinyang-255	26	female			Xinyang	10/2/2020	10/2/2020	No	Xinyang Municipal Health Commussion	http://www.hnxywjw.gov.cn/	Du			Wuhan
xinyang-107	62	male			24/01/2020	24/01/2020	xinyang-263	58	female			Xinyang	15/02/2020	15/02/2020	Household	Xinyang Municipal Health Commussion	http://www.hnxywjw.gov.cn/	Du			Xinyang
xinyang-125	47	male			23/01/2020	23/01/2020	xinyang-265	56	female			Xinyang	31/01/2020	31/01/2020	No	Xinyang Municipal Health Commussion	http://www.hnxywjw.gov.cn/	Du			Wuhan
xinyang-209	36	male			1/2/2020	1/2/2020	xinyang-266	58	female			Xinyang	14/02/2020	14/02/2020	Household	Xinyang Municipal Health Commussion	http://www.hnxywjw.gov.cn/	Du			Xinyang
nanyang-19	55	female			20/01/2020	20/01/2020	nanyang-56	48	male			Nanyang	29/01/2020	29/01/2020	No	Nanyang Municipal Health Commussion	http://nyws.nanyang.gov.cn/	Du			Wuhan
nanyang-19	55	female			20/01/2020	20/01/2020	nanyang-57	33	female			Nanyang	28/01/2020	28/01/2020	No	Nanyang Municipal Health Commussion	http://nyws.nanyang.gov.cn/	Du			Wuhan
nanyang-19	55	female			20/01/2020	20/01/2020	nanyang-59	30	female			Nanyang	30/01/2020	30/01/2020	No	Nanyang Municipal Health Commussion	http://nyws.nanyang.gov.cn/	Du			Wuhan
nanyang-19	55	female			20/01/2020	20/01/2020	nanyang-92	33	female			Nanyang	31/01/2020	31/01/2020	Household	Nanyang Municipal Health Commussion	http://nyws.nanyang.gov.cn/	Du			Wuhan
nanyang-71	57	male			17/01/2020	17/01/2020	nanyang-94	50	female			Nanyang	31/01/2020	31/01/2020	Household	Nanyang Municipal Health Commussion	http://nyws.nanyang.gov.cn/	Du			Wuhan
nanyang-62	34	male			22/01/2020	22/01/2020	nanyang-95	3	male			Wuhan	1/2/2020	1/2/2020	Household	Nanyang Municipal Health Commussion	http://nyws.nanyang.gov.cn/	Du			Wuhan
nanyang-53	22	male			29/01/2020	29/01/2020	nanyang-99	54	female			Nanyang	1/2/2020	1/2/2020	No	Nanyang Municipal Health Commussion	http://nyws.nanyang.gov.cn/	Du			Wuhan
nanyang-85	29	male			30/01/2020	30/01/2020	nanyang-109	59	female			Nanyang	2/2/2020	2/2/2020	Household	Nanyang Municipal Health Commussion	http://nyws.nanyang.gov.cn/	Du			Wuhan
nanyang-63	56	female			24/01/2020	24/01/2020	nanyang-110	59	female			Nanyang	1/2/2020	1/2/2020	No	Nanyang Municipal Health Commussion	http://nyws.nanyang.gov.cn/	Du			Nanyang
nanyang-84	27	female			29/01/2020	29/01/2020	nanyang-116	64	female			Nanyang	4/2/2020	4/2/2020	Household	Nanyang Municipal Health Commussion	http://nyws.nanyang.gov.cn/	Du			Xiangyang
nanyang-32	29	male			22/01/2020	22/01/2020	nanyang-117	30	male			Nanyang	1/2/2020	1/2/2020	No	Nanyang Municipal Health Commussion	http://nyws.nanyang.gov.cn/	Du			Wuhan
nanyang-91	69	female			28/01/2020	28/01/2020	nanyang-118	54	male			Nanyang	3/2/2020	3/2/2020	No	Nanyang Municipal Health Commussion	http://nyws.nanyang.gov.cn/	Du			Nanyang
nanyang-4	23	female			23/01/2020	23/01/2020	nanyang-121	74	male			Nanyang	3/2/2020	3/2/2020	Household	Nanyang Municipal Health Commussion	http://nyws.nanyang.gov.cn/	Du			Wuhan
nanyang-79	37	male			29/01/2020	29/01/2020	nanyang-128	35	female			Nanyang	3/2/2020	3/2/2020	Household	Nanyang Municipal Health Commussion	http://nyws.nanyang.gov.cn/	Du			Nanyang
nanyang-136	55	female			3/2/2020	3/2/2020	nanyang-137	35	male			Nanyang	6/2/2020	6/2/2020	No	Nanyang Municipal Health Commussion	http://nyws.nanyang.gov.cn/	Du			Nanyang
nanyang-56	48	male			29/01/2020	29/01/2020	nanyang-142	35	male			Nanyang	6/2/2020	6/2/2020	No	Nanyang Municipal Health Commussion	http://nyws.nanyang.gov.cn/	Du			Nanyang
nanyang-135	39	female			6/2/2020	6/2/2020	nanyang-145	38	male			Nanyang	11/2/2020	11/2/2020	Household	Nanyang Municipal Health Commussion	http://nyws.nanyang.gov.cn/	Du			Nanyang
jiaozuo-10	47	female			26/01/2020	26/01/2020	jiaozuo-11	83	female			Jiaozuo	31/01/2020	31/01/2020	No	Jiaozuo Municipal Health Commussion	http://www.jzswjw.gov.cn/	Du			Nanning
jiaozuo-10	47	female			26/01/2020	26/01/2020	jiaozuo-15	52	male			Nanning	23/01/2020	23/01/2020	Household	Jiaozuo Municipal Health Commussion	http://www.jzswjw.gov.cn/	Du			Nanning
kaifeng-12	33	male			1/2/2020	1/2/2020	kaifeng-18	43	female			Wuhan	3/2/2020	3/2/2020	No	Kaifeng Municipal Health Commussion	http://www.kfwsjsw.gov.cn/	Du			Shenzhen
kaifeng-11	30	male			27/01/2020	27/01/2020	kaifeng-19	28	female			Kaifeng	6/2/2020	6/2/2020	Household	Kaifeng Municipal Health Commussion	http://www.kfwsjsw.gov.cn/	Du			Wuhan
puyang-5	50	female			27/01/2020	27/01/2020	puyang-9	18	female			Puyang	10/2/2020	10/2/2020	Household	The People_ Government of Puyang Municipality	http://www.puyang.gov.cn	Du			Puyang
puyang-5	50	female			27/01/2020	27/01/2020	puyang-11	27	female			Puyang	8/2/2020	8/2/2020	Household	The People_ Government of Puyang Municipality	http://www.puyang.gov.cn	Du			Puyang
xuchang-16	24	male			26/01/2020	26/01/2020	xuchang-17	51	female			Xuchang	29/01/2020	29/01/2020	Household	Xu Chang Municipal Health Commussion	http://xcswjw.xuchang.gov.cn/	Du			Wuhan
xuchang-32	55	male			1/2/2020	1/2/2020	xuchang-33	55	female			Xuchang	4/2/2020	4/2/2020	Household	Xu Chang Municipal Health Commussion	http://xcswjw.xuchang.gov.cn/	Du			Xuchang
luoyang-10	83	male			27/01/2020	27/01/2020	luoyang-20	63	male			Luoyang	6/2/2020	6/2/2020	No	The People_ Government of Luoyang Municipality	http://www.ly.gov.cn	Du			Luoyang
hebi-7	31	male			4/2/2020	4/2/2020	hebi-8	30	female			Hebi	3/2/2020	3/2/2020	Household	Hebi Municipal Health Commussion	https://wsjkw.hebi.gov.cn/	Du			Wuhan
zhoukou-4	46	male			18/01/2020	18/01/2020	zhoukou-5	49	female			Zhoukou	19/01/2020	19/01/2020	Household	Zhoukou Municipal People's Government	http://www.hazhoukou.gov.cn/Home/gkml?code=gstg	Du			Wuhan
zhoukou-20	35	male			23/01/2020	23/01/2020	zhoukou-53	31	female			Zhoukou	19/01/2020	19/01/2020	No	Zhoukou Municipal People's Government	http://www.hazhoukou.gov.cn/Home/gkml?code=gstg	Du			Wuhan
zhoukou-17	33	male			25/01/2020	25/01/2020	zhoukou-70	56	male			Zhoukou	8/2/2020	8/2/2020	No	Zhoukou Municipal People's Government	http://www.hazhoukou.gov.cn/Home/gkml?code=gstg	Du			Wuhan
shangqiu-15	32	male			24/01/2020	24/01/2020	shangqiu-21	32	female			Shangqiu	25/01/2020	25/01/2020	Household	Shangqiu Municipal People's Government	http://www.shangqiu.gov.cn/Category_1026/Index.aspx	Du			Wuhan
shangqiu-7	45	female			24/01/2020	24/01/2020	shangqiu-23	50	male			Shangqiu	26/01/2020	26/01/2020	Household	Shangqiu Municipal People's Government	http://www.shangqiu.gov.cn/Category_1026/Index.aspx	Du			Wuhan
shangqiu-57	81	male			30/01/2020	30/01/2020	shangqiu-62	81	female			Shangqiu	5/2/2020	5/2/2020	Household	Shangqiu Municipal People's Government	http://www.shangqiu.gov.cn/Category_1026/Index.aspx	Du			Shangqiu
luohe-29	41	male			26/01/2020	26/01/2020	luohe-30	47	male			Luohe	10/2/2020	10/2/2020	Household	The People_ Government of Luohe Municipality	http://www.luohe.gov.cn	Du			Luohe
huaihua-5	36	female			7/1/2020	7/1/2020	huaihua-6	31	male			Huaihua	10/1/2020	10/1/2020	No	Huaihua Municipal Health Commussion	http://www.huaihua.gov.cn/wsjkw/c100577/list.shtml	Du			Wuhan
changde-14	51	male			21/01/2020	21/01/2020	changde-15	48	female			Changde	24/01/2020	24/01/2020	Household	Changde Municipal Health Commussion	http://wjw.changde.gov.cn	Du			Changde
changde-46	56	male			2/2/2020	2/2/2020	changde-47	76	female			Changde	2/2/2020	2/2/2020	Household	Changde Municipal Health Commussion	http://wjw.changde.gov.cn	Du			Wuhan
changde-68	53	female			24/01/2020	24/01/2020	changde-69	65	female			Changde	1/2/2020	1/2/2020	No	Changde Municipal Health Commussion	http://wjw.changde.gov.cn	Du			Changde
changde-67	62	female			1/2/2020	1/2/2020	changde-68	53	female			Changde	24/01/2020	24/01/2020	No	Changde Municipal Health Commussion	http://wjw.changde.gov.cn	Du			Changde
changde-52	60	male			23/01/2020	23/01/2020	changde-70	27	female			Changde	14/02/2020	14/02/2020	No	Changde Municipal Health Commussion	http://wjw.changde.gov.cn	Du			Changde
yueyang-93	51	male			31/01/2020	31/01/2020	yueyang-116	0	male			Yue Yang	8/2/2020	8/2/2020	Household	The People_ Government of Yueyang Municipality	http://www.yueyang.gov.cn/index.html	Du			Yue Yang
					17/01/2020	17/01/2020							20/01/2020	20/01/2020				He
					31/01/2020	31/01/2020							6/2/2020	6/2/2020				He
					29/01/2020	29/01/2020							1/2/2020	1/2/2020				He
					29/01/2020	29/01/2020							5/2/2020	5/2/2020				He
					25/01/2020	25/01/2020							28/01/2020	28/01/2020				He
					29/01/2020	29/01/2020							1/2/2020	1/2/2020				He
					29/01/2020	29/01/2020							1/2/2020	1/2/2020				He
					30/01/2020	30/01/2020							3/2/2020	3/2/2020				He
					12/2/2020	12/2/2020							12/2/2020	12/2/2020				He
					13/02/2020	13/02/2020							25/02/2020	25/02/2020				He
					13/02/2020	13/02/2020							29/02/2020	29/02/2020				He
					12/2/2020	12/2/2020							16/02/2020	16/02/2020				He
					13/02/2020	13/02/2020							15/02/2020	15/02/2020				He
					13/02/2020	13/02/2020							17/02/2020	17/02/2020				He
					17/02/2020	17/02/2020							19/02/2020	19/02/2020				He
					17/02/2020	17/02/2020							19/02/2020	19/02/2020				He
					15/02/2020	15/02/2020							17/02/2020	17/02/2020				He
					15/02/2020	15/02/2020							17/02/2020	17/02/2020				He
					20/02/2020	20/02/2020							20/02/2020	20/02/2020				He
					3/2/2020	3/2/2020							17/02/2020	17/02/2020				He
					3/2/2020	9/2/2020							24/02/2020	24/02/2020				He
					13/02/2020	13/02/2020							25/02/2020	25/02/2020				He
					25/01/2020	25/01/2020							26/01/2020	26/01/2020				He
					21/01/2020	21/01/2020							27/01/2020	27/01/2020				He
					6/2/2020	6/2/2020							24/02/2020	24/02/2020				He
					22/01/2020	23/01/2020							28/01/2020	28/01/2020				He
					28/01/2020	28/01/2020							31/01/2020	31/01/2020				He
					12/1/2020	15/01/2020							22/01/2020	22/01/2020				He
					22/01/2020	22/01/2020							28/01/2020	28/01/2020				He
					18/01/2020	18/01/2020							24/01/2020	24/01/2020				He
					4/1/2020	12/1/2020							25/01/2020	25/01/2020				He
					24/01/2020	24/01/2020							25/01/2020	25/01/2020				He
					17/01/2020	17/01/2020							28/01/2020	28/01/2020				He
					26/01/2020	26/01/2020							30/01/2020	30/01/2020				He
					19/01/2020	19/01/2020							4/2/2020	4/2/2020				He
					29/01/2020	29/01/2020							5/2/2020	5/2/2020				He
					10/1/2020	10/1/2020							15/01/2020	15/01/2020				He
					10/1/2020	10/1/2020							17/01/2020	17/01/2020				He
					15/01/2020	15/01/2020							24/01/2020	24/01/2020				He
					22/01/2020	22/01/2020							24/01/2020	24/01/2020				He
					22/01/2020	22/01/2020							25/01/2020	25/01/2020				He
					22/01/2020	22/01/2020							24/01/2020	24/01/2020				He
					22/01/2020	22/01/2020							22/01/2020	22/01/2020				He
					22/01/2020	22/01/2020							24/01/2020	24/01/2020				He
					25/01/2020	25/01/2020							3/2/2020	3/2/2020				He
					29/01/2020	29/01/2020							1/2/2020	1/2/2020				He
					29/01/2020	29/01/2020							6/2/2020	6/2/2020				He
					29/01/2020	29/01/2020							3/2/2020	3/2/2020				He
					23/01/2020	23/01/2020							3/2/2020	3/2/2020				He
					30/01/2020	30/01/2020							2/2/2020	2/2/2020				He
					14/01/2020	15/01/2020							24/01/2020	24/01/2020				He
					24/01/2020	24/01/2020							1/2/2020	1/2/2020				He
					17/01/2020	17/01/2020							31/01/2020	31/01/2020				He
					22/01/2020	22/01/2020							19/01/2020	19/01/2020				He
					16/01/2020	16/01/2020							25/01/2020	25/01/2020				He
					18/01/2020	18/01/2020							22/01/2020	22/01/2020				He
					18/01/2020	18/01/2020							22/01/2020	22/01/2020				He
					18/01/2020	18/01/2020							25/01/2020	25/01/2020				He
					18/01/2020	18/01/2020							25/01/2020	25/01/2020				He
					29/01/2020	29/01/2020							3/2/2020	3/2/2020				He
					21/01/2020	23/01/2020							27/01/2020	27/01/2020				He
					21/01/2020	23/01/2020							27/01/2020	27/01/2020				He
					10/1/2020	29/01/2020							22/01/2020	22/01/2020				He
					24/01/2020	24/01/2020							25/01/2020	25/01/2020				He
					24/01/2020	24/01/2020							31/01/2020	31/01/2020				He
					23/01/2020	26/01/2020							30/01/2020	30/01/2020				He
					30/01/2020	30/01/2020							1/2/2020	1/2/2020				He
					28/01/2020	28/01/2020							24/01/2020	24/01/2020				He
					26/01/2020	26/01/2020							2/2/2020	2/2/2020				He
					27/01/2020	27/01/2020							31/01/2020	31/01/2020				He
					24/01/2020	24/01/2020							1/2/2020	1/2/2020				He
					28/01/2020	3/2/2020							8/2/2020	8/2/2020				He
					9/2/2020	9/2/2020							12/2/2020	12/2/2020				He
					1/1/2020	4/1/2020							8/1/2020	8/1/2020				He
					24/02/2020	24/02/2020							29/02/2020	29/02/2020				He
					29/02/2020	29/02/2020							4/3/2020	4/3/2020				He
					20/02/2020	20/02/2020							3/3/2020	3/3/2020				He
8_6			10/1/2020		13/01/2020	13/01/2020							21/01/2020	21/01/2020				Xia						10/1/2020
2_2			12/1/2020		14/01/2020	14/01/2020							19/01/2020	19/01/2020				Xia						12/1/2020
42_25			14/01/2020		15/01/2020	15/01/2020							22/01/2020	22/01/2020				Xia						14/01/2020
39_23			15/01/2020		16/01/2020	16/01/2020							19/01/2020	19/01/2020				Xia						15/01/2020
9_7			12/1/2020		17/01/2020	17/01/2020							28/01/2020	28/01/2020				Xia						12/1/2020
30_19			17/01/2020		18/01/2020	18/01/2020							24/01/2020	24/01/2020				Xia						17/01/2020
3_3			14/01/2020		19/01/2020	19/01/2020							24/01/2020	24/01/2020				Xia						14/01/2020
4_3			14/01/2020		19/01/2020	19/01/2020							24/01/2020	24/01/2020				Xia						15/01/2020
5_3			14/01/2020		19/01/2020	19/01/2020							22/01/2020	22/01/2020				Xia						15/01/2020
10_8			17/01/2020		19/01/2020	19/01/2020							22/01/2020	22/01/2020				Xia						17/01/2020
11_8			17/01/2020		19/01/2020	19/01/2020							22/01/2020	22/01/2020				Xia						17/01/2020
31_20			16/01/2020		19/01/2020	19/01/2020							21/01/2020	21/01/2020				Xia						17/01/2020
40_24			19/01/2020		20/01/2020	20/01/2020							22/01/2020	22/01/2020				Xia						19/01/2020
41_24			19/01/2020		20/01/2020	20/01/2020							24/01/2020	24/01/2020				Xia						19/01/2020
66_44			14/01/2020		20/01/2020	20/01/2020							28/01/2020	28/01/2020				Xia						18/01/2020
67_44			14/01/2020		20/01/2020	20/01/2020							31/01/2020	31/01/2020				Xia						14/01/2020
13_10			13/01/2020		21/01/2020	21/01/2020							27/01/2020	27/01/2020				Xia						13/01/2020
28_18			19/01/2020		21/01/2020	21/01/2020							23/01/2020	23/01/2020				Xia						19/01/2020
29_18			19/01/2020		21/01/2020	21/01/2020							27/01/2020	27/01/2020				Xia						19/01/2020
43_26			13/01/2020		21/01/2020	21/01/2020							27/01/2020	27/01/2020				Xia						13/01/2020
52_33			20/01/2020		21/01/2020	21/01/2020							30/01/2020	30/01/2020				Xia						20/01/2020
53_33			20/01/2020		21/01/2020	21/01/2020							26/01/2020	26/01/2020				Xia						20/01/2020
68_45			19/01/2020		21/01/2020	21/01/2020							23/01/2020	23/01/2020				Xia						19/01/2020
6_4			18/01/2020		22/01/2020	22/01/2020							28/01/2020	28/01/2020				Xia						20/01/2020
18_14			20/01/2020		22/01/2020	22/01/2020							27/01/2020	27/01/2020				Xia						20/01/2020
19_14			20/01/2020		22/01/2020	22/01/2020							27/01/2020	27/01/2020				Xia						20/01/2020
25_17			14/01/2020		22/01/2020	22/01/2020							26/01/2020	26/01/2020				Xia						14/01/2020
26_17			14/01/2020		22/01/2020	22/01/2020							25/01/2020	25/01/2020				Xia						18/01/2020
27_17			14/01/2020		22/01/2020	22/01/2020							28/01/2020	28/01/2020				Xia						20/01/2020
34_22			19/01/2020		22/01/2020	22/01/2020							24/01/2020	24/01/2020				Xia						21/01/2020
35_22			19/01/2020		22/01/2020	22/01/2020							25/01/2020	25/01/2020				Xia						21/01/2020
36_22			19/01/2020		22/01/2020	22/01/2020							24/01/2020	24/01/2020				Xia						21/01/2020
37_22			19/01/2020		22/01/2020	22/01/2020							22/01/2020	22/01/2020				Xia						21/01/2020
38_22			19/01/2020		22/01/2020	22/01/2020							24/01/2020	24/01/2020				Xia						21/01/2020
51_32			19/01/2020		22/01/2020	22/01/2020							27/01/2020	27/01/2020				Xia						20/01/2020
55_35			19/01/2020		22/01/2020	22/01/2020							22/01/2020	22/01/2020				Xia						21/01/2020
73_49			15/01/2020		22/01/2020	22/01/2020							24/01/2020	24/01/2020				Xia						19/01/2020
14_11			20/01/2020		23/01/2020	23/01/2020							27/01/2020	27/01/2020				Xia						20/01/2020
15_11			20/01/2020		23/01/2020	23/01/2020							27/01/2020	27/01/2020				Xia						20/01/2020
44_27			20/01/2020		23/01/2020	23/01/2020							27/01/2020	27/01/2020				Xia						20/01/2020
45_27			20/01/2020		23/01/2020	23/01/2020							27/01/2020	27/01/2020				Xia						20/01/2020
49_31			20/01/2020		23/01/2020	23/01/2020							24/01/2020	24/01/2020				Xia						20/01/2020
50_31			20/01/2020		23/01/2020	23/01/2020							25/01/2020	25/01/2020				Xia						20/01/2020
56_36			19/01/2020		23/01/2020	23/01/2020							26/01/2020	26/01/2020				Xia						19/01/2020
57_37			19/01/2020		23/01/2020	23/01/2020							5/2/2020	5/2/2020				Xia						19/01/2020
63_42			13/01/2020		23/01/2020	23/01/2020							4/2/2020	4/2/2020				Xia						13/01/2020
7_5			16/01/2020		24/01/2020	24/01/2020							23/01/2020	23/01/2020				Xia						16/01/2020
48_30			22/01/2020		24/01/2020	24/01/2020							29/01/2020	29/01/2020				Xia						22/01/2020
58_38			22/01/2020		24/01/2020	24/01/2020							1/2/2020	1/2/2020				Xia						22/01/2020
71_48			20/01/2020		24/01/2020	24/01/2020							26/01/2020	26/01/2020				Xia						20/01/2020
72_48			20/01/2020		24/01/2020	24/01/2020							30/01/2020	30/01/2020				Xia						20/01/2020
12_9			22/01/2020		25/01/2020	25/01/2020							28/01/2020	28/01/2020				Xia						22/01/2020
60_40			21/01/2020		25/01/2020	25/01/2020							1/2/2020	1/2/2020				Xia						21/01/2020
61_40			21/01/2020		25/01/2020	25/01/2020							8/2/2020	8/2/2020				Xia						21/01/2020
32_21			22/01/2020		26/01/2020	26/01/2020							25/01/2020	25/01/2020				Xia						22/01/2020
33_21			22/01/2020		26/01/2020	26/01/2020							27/01/2020	27/01/2020				Xia						22/01/2020
46_28			20/01/2020		26/01/2020	26/01/2020							31/01/2020	31/01/2020				Xia						20/01/2020
17_13			23/01/2020		27/01/2020	27/01/2020							29/01/2020	29/01/2020				Xia						22/01/2020
20_15			23/01/2020		27/01/2020	27/01/2020							1/2/2020	1/2/2020				Xia						24/01/2020
21_15			23/01/2020		27/01/2020	27/01/2020							31/01/2020	31/01/2020				Xia						24/01/2020
16_12			22/01/2020		28/01/2020	28/01/2020							29/01/2020	29/01/2020				Xia						23/01/2020
1_1			23/01/2020		29/01/2020	29/01/2020							1/2/2020	1/2/2020				Xia						23/01/2020
22_16			22/01/2020		29/01/2020	29/01/2020							31/01/2020	31/01/2020				Xia						26/01/2020
23_16			22/01/2020		29/01/2020	29/01/2020							3/2/2020	3/2/2020				Xia						25/01/2020
24_16			22/01/2020		29/01/2020	29/01/2020							3/2/2020	3/2/2020				Xia						26/01/2020
69_46			21/01/2020		29/01/2020	29/01/2020							26/01/2020	26/01/2020				Xia						22/01/2020
70_47			24/01/2020		29/01/2020	29/01/2020							6/2/2020	6/2/2020				Xia						25/01/2020
54_34			28/01/2020		30/01/2020	30/01/2020							5/2/2020	5/2/2020				Xia						28/01/2020
74_50			14/01/2020		31/01/2020	31/01/2020							2/2/2020	2/2/2020				Xia						14/01/2020
59_39			23/01/2020		1/2/2020	1/2/2020							2/2/2020	2/2/2020				Xia						23/01/2020
47_29			19/01/2020		4/2/2020	4/2/2020							3/2/2020	3/2/2020				Xia						19/01/2020
62_41			22/01/2020		6/2/2020	6/2/2020							6/2/2020	6/2/2020				Xia						22/01/2020
64_43			23/01/2020		8/2/2020	8/2/2020							8/2/2020	8/2/2020				Xia						23/01/2020
65_43			23/01/2020		8/2/2020	8/2/2020							9/2/2020	9/2/2020				Xia						23/01/2020
	49	male			12/12/2019			78	male			Wuhan	19/12/2019	19/12/2019		Li et al		Wu
	61	male			20/12/2019			57	female			Wuhan	25/12/2019	25/12/2019		Li et al		Wu
	61	male			20/12/2019			31	female			Wuhan	29/12/2019	29/12/2019		Li et al		Wu
	52	female			21/12/2019			25	female			Wuhan	24/12/2019	24/12/2019		Li et al		Wu
	62	female			27/12/2019			64	male			Wuhan	3/1/2020	3/1/2020		Li et al		Wu
	32	male			4/1/2020			28	female			Huanggang	11/1/2020	11/1/2020		Li et al		Wu
	64	female			4/1/2020		shenzhen-	69	male			Shenzhen	12/1/2020	12/1/2020		12nd case in Shenzhen		Wu				Local infection
	69	male			12/1/2020		shenzhen-	25	female			Shenzhen	25/01/2020	25/01/2020		188th case in Shenzhen		Wu				15/01/2020
	64	female			17/01/2020		shenzhen-	37	female			Shenzhen	28/01/2020	28/01/2020		275th case in Shenzhen		Wu				22/01/2020
	64	male			18/01/2020		shenzhen-	37	male			Shenzhen	24/01/2020	24/01/2020		169th case in Shenzhen		Wu				17/01/2020
	62	female			19/01/2020		shenzhen-	43	female			Shenzhen	4/2/2020	4/2/2020		320th case in Shenzhen		Wu				22/01/2020
	73	male			20/01/2020		shenzhen-	49	male			Shenzhen	24/01/2020	24/01/2020		68th case in Shenzhen		Wu				19/01/2020
	73	male			20/01/2020		shenzhen-	49	female			Shenzhen	22/01/2020	22/01/2020		69th case in Shenzhen		Wu				19/01/2020
	34	male			20/01/2020		shenzhen-	32	male			Shenzhen	23/01/2020	23/01/2020		100th case in Shenzhen		Wu				20/01/2020
	34	male			20/01/2020		shenzhen-	32	male			Shenzhen	25/01/2020	25/01/2020		101st case in Shenzhen		Wu				20/01/2020
	34	male			20/01/2020		shenzhen-	34	male			Shenzhen	26/01/2020	26/01/2020		102nd case in Shenzhen		Wu				20/01/2020
	42	male			20/01/2020		shenzhen-	6	male			Shenzhen	6/2/2020	6/2/2020		340th case in Shenzhen		Wu				Local infection
	69	male			21/01/2020		shenzhen-	66	female			Shenzhen	2/2/2020	2/2/2020		335th case in Shenzhen		Wu				Local infection
	30	female			22/01/2020		shenzhen-	38	female			Shenzhen	28/01/2020	28/01/2020		108th case in Shenzhen		Wu				21/01/2020
	61	male			24/01/2020		shenzhen-	35	female			Shenzhen	26/01/2020	26/01/2020		120th case in Shenzhen		Wu				22/01/2020
	61	male			24/01/2020		shenzhen-	39	male			Shenzhen	26/01/2020	26/01/2020		121st case in Shenzhen		Wu				22/01/2020
	59, 61	female, male			24/01/2020		shenzhen-	34	female			Shenzhen	25/01/2020	25/01/2020		253rd case in Shenzhen		Wu				21/01/2020
	78	male			26/01/2020		shenzhen-	78	female			Shenzhen	30/01/2020	30/01/2020		283rd case in Shenzhen		Wu				16/01/2020
	50	female			26/01/2020		shenzhen-	37	female			Shenzhen	5/2/2020	5/2/2020		354th case in Shenzhen		Wu				Local infection
	69	male			9/2/2020		shenzhen-	69	female			Shenzhen	10/2/2020	10/2/2020		402nd case in Shenzhen		Wu				Local infection
	69	male			9/2/2020		shenzhen-	49	male			Shenzhen	10/2/2020	10/2/2020		397th case in Shenzhen		Wu				Local infection
	65,66, 37, 36	female, male, female, male			1/1/2020	4/1/2020		63	female			Shenzhen	8/1/2020	8/1/2020		Chan et al		Wu	not_certain			4/1/2020
	64, 71	female, male			12/1/2020	15/01/2020	shenzhen-	38	female			Shenzhen	22/01/2020	22/01/2020		39th case in Shenzhen		Wu	not_certain			12/1/2020
	61, 35,39	male, female, male			24/01/2020	26/01/2020	shenzhen-	2	male			Shenzhen	5/2/2020	5/2/2020		327th case in Shenzhen		Wu	not_certain			24/01/2020
	61, 35,39	male, female, male			24/01/2020	26/01/2020	shenzhen-	62	female			Shenzhen	5/2/2020	5/2/2020		345th case in Shenzhen		Wu	not_certain			22/01/2020
			13/01/2020	15/01/2020	16/01/2020	16/01/2020		70	female			Hubei	23/01/2020	23/01/2020		Contact Wuhan cases		Yang																	1/24/2020
			12/1/2020	19/01/2020	16/01/2020	16/01/2020		43	female			Hubei	18/01/2020	18/01/2020		Contact Wuhan cases		Yang																	1/25/2020
					16/01/2020	16/01/2020		43	male			Hubei	17/01/2020	17/01/2020		Contact Wuhan cases		Yang																	1/25/2020
			14/01/2020	18/01/2020	16/01/2020	16/01/2020		47	male			Hubei	19/01/2020	19/01/2020		Contact Wuhan cases		Yang																	1/25/2020
			13/01/2020	17/01/2020	16/01/2020	16/01/2020		35	male			Hubei	25/01/2020	25/01/2020		Contact Wuhan cases		Yang																	1/26/2020
			16/01/2020	21/01/2020	16/01/2020	16/01/2020		44	female			Hubei	23/01/2020	23/01/2020		Contact Wuhan cases		Yang																	1/26/2020
			NA	NA	16/01/2020	16/01/2020		45	male			Hubei	23/01/2020	23/01/2020		Contact Wuhan cases		Yang																	1/26/2020
			13/01/2020	18/01/2020	18/01/2020	18/01/2020		27	female			Hubei	22/01/2020	22/01/2020		Locally infected		Yang																	1/24/2020
			17/01/2020	20/01/2020	18/01/2020	18/01/2020		68	male			Hubei	3/2/2020	3/2/2020		Contact Wuhan cases		Yang																	2/4/2020
			17/01/2020	18/01/2020	18/01/2020	18/01/2020		34	female			Hubei	23/01/2020	23/01/2020		Contact Wuhan cases		Yang																	2/6/2020
			17/01/2020	18/01/2020	19/01/2020	19/01/2020		56	female			Hubei	26/01/2020	26/01/2020		Contact Wuhan cases		Yang																	1/31/2020
			18/01/2020	24/01/2020	19/01/2020	19/01/2020		52	male			Hubei	28/01/2020	28/01/2020		Locally infected		Yang																	1/31/2020
			23/01/2020	24/01/2020	19/01/2020	19/01/2020		46	female			Hubei	6/2/2020	6/2/2020		Contact Wuhan cases		Yang																	2/8/2020
			19/01/2020	22/01/2020	20/01/2020	20/01/2020		50	female			Hubei	25/01/2020	25/01/2020		Contact Wuhan cases		Yang																	1/27/2020
			19/01/2020	24/01/2020	20/01/2020	20/01/2020		44	male			Hubei	1/2/2020	1/2/2020		Contact Wuhan cases		Yang																	2/4/2020
			22/01/2020	25/01/2020	20/01/2020	20/01/2020		69	female			Hubei	4/2/2020	4/2/2020		Contact Wuhan cases		Yang																	2/5/2020
			20/01/2020	25/01/2020	20/01/2020	20/01/2020		64	female			Hubei	31/01/2020	31/01/2020		Contact Wuhan cases		Yang																	2/6/2020
			19/01/2020	22/01/2020	21/01/2020	21/01/2020		52	female			Hubei	26/01/2020	26/01/2020		Contact Wuhan cases		Yang																	1/27/2020
			18/01/2020	23/01/2020	21/01/2020	21/01/2020		43	female			Hubei	24/01/2020	24/01/2020		Contact Wuhan cases		Yang																	1/27/2020
			18/01/2020	22/01/2020	21/01/2020	21/01/2020		47	female			Hubei	25/01/2020	25/01/2020		Contact Wuhan cases		Yang																	1/27/2020
			21/01/2020	26/01/2020	21/01/2020	21/01/2020		59	male			Hubei	1/2/2020	1/2/2020		Contact Wuhan cases		Yang																	2/5/2020
			NA	NA	21/01/2020	21/01/2020		44	male			Hubei	1/2/2020	1/2/2020		Contact Wuhan cases		Yang																	2/5/2020
			NA	NA	21/01/2020	21/01/2020		37	female			Hubei	6/2/2020	6/2/2020		Contact Wuhan cases		Yang																	2/7/2020
			NA	NA	21/01/2020	21/01/2020		70	female			Hubei	6/2/2020	6/2/2020		Contact Wuhan cases		Yang																	2/7/2020
			17/01/2020	18/01/2020	22/01/2020	22/01/2020		55	female			Hubei	23/01/2020	23/01/2020		Contact Wuhan cases		Yang																	1/26/2020
			NA	NA	22/01/2020	22/01/2020		0.75	male			Hubei	23/01/2020	23/01/2020		Locally infected		Yang																	1/28/2020
			NA	NA	22/01/2020	22/01/2020		64	female			Hubei	4/2/2020	4/2/2020		Contact Wuhan cases		Yang																	2/6/2020
			NA	NA	22/01/2020	22/01/2020		54	male			Hubei	7/2/2020	7/2/2020		Locally infected		Yang																	2/10/2020
			19/01/2020	23/01/2020	23/01/2020	23/01/2020		28	male			Hubei	25/01/2020	25/01/2020		Locally infected		Yang																	1/27/2020
			18/01/2020	21/01/2020	23/01/2020	23/01/2020		46	male			Hubei	27/01/2020	27/01/2020		Locally infected		Yang																	1/27/2020
			NA	NA	23/01/2020	23/01/2020		33	male			Hubei	25/01/2020	25/01/2020		Wuhan imported		Yang																	1/30/2020
[truncated: 302 more rows]
