# Supplementary figures and images for: The unmitigated profile of COVID-19 infectiousness
Source: eLife journal article supplement (doi:10.7554/elife.79134), 2022-07-28

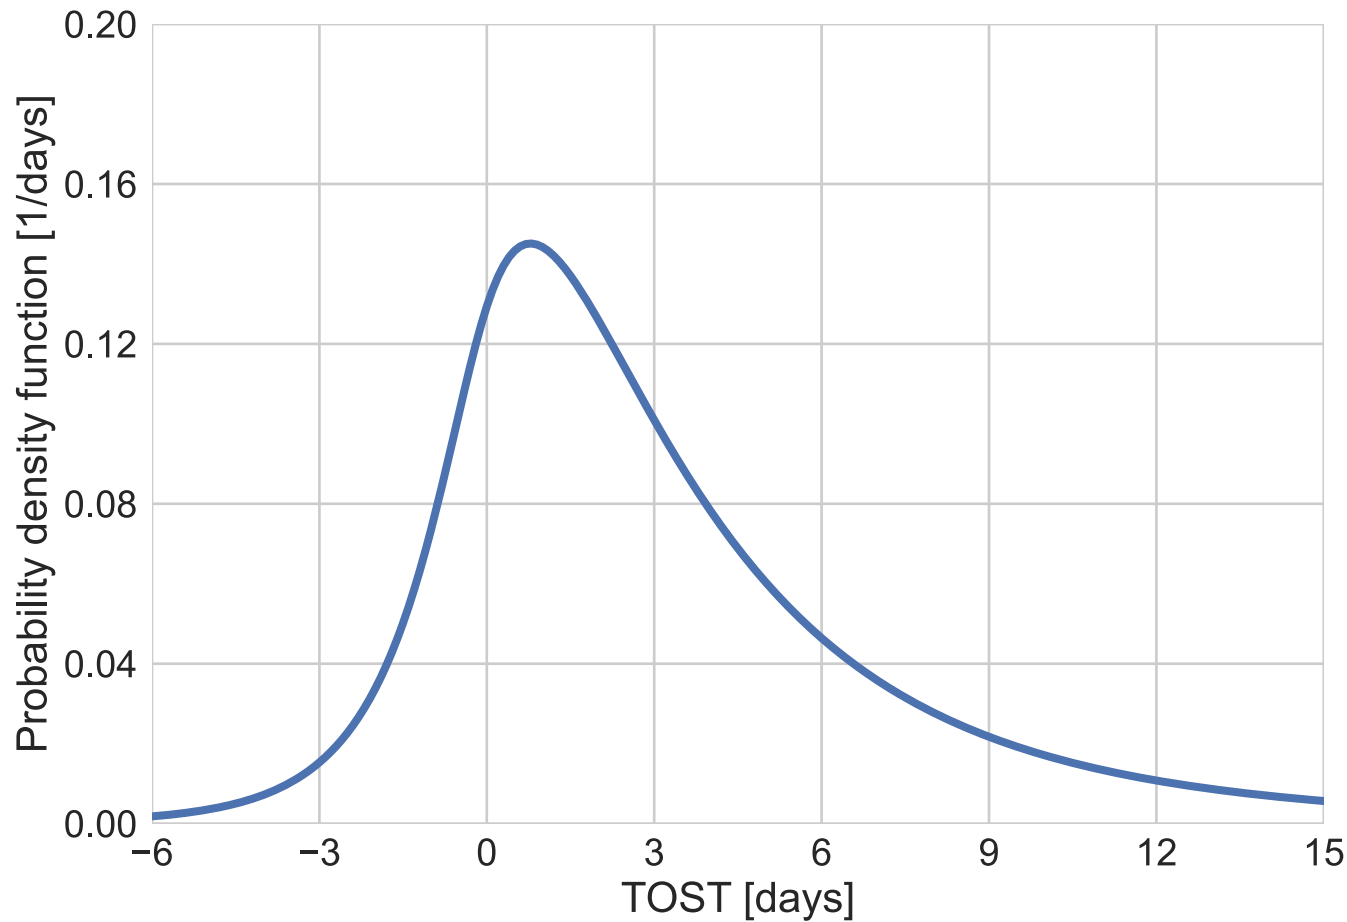

Supplement: supp [file elife_poa_e79134_Figure_3_figure_supplement_1.pdf › elife_poa_e79134_Figure_3_figure_supplement_1.pdf]

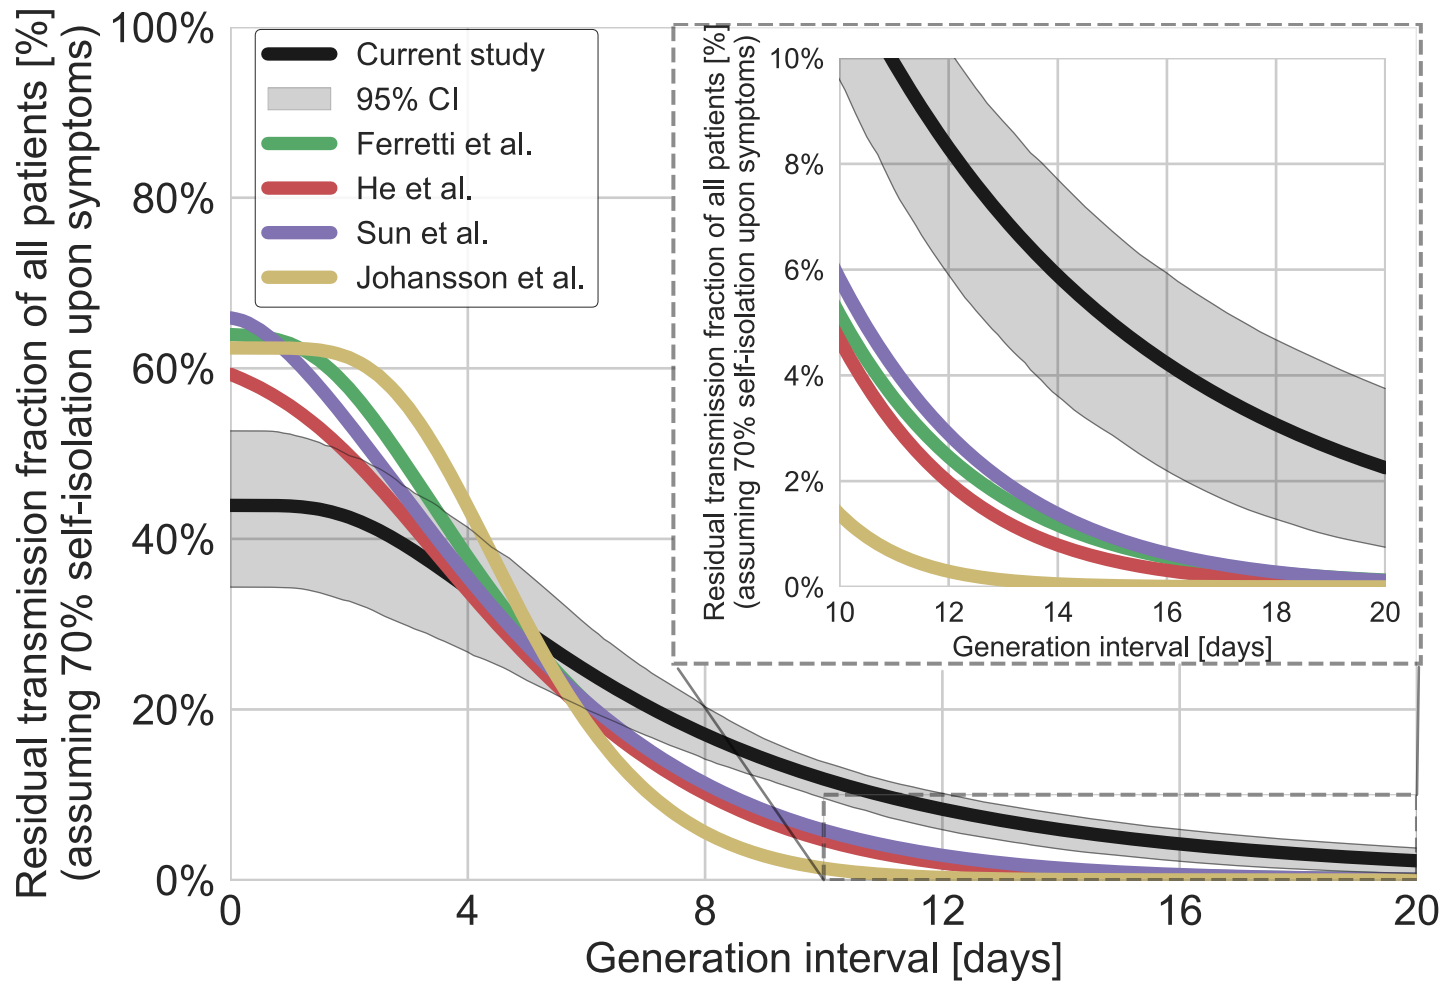

Supplement: supp [file elife_poa_e79134_Figure_4_figure_supplement_1.pdf › elife_poa_e79134_Figure_4_figure_supplement_1.pdf]

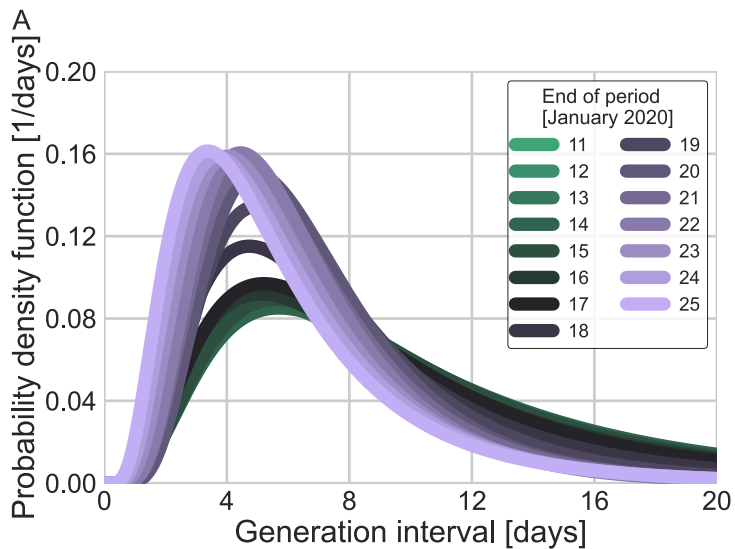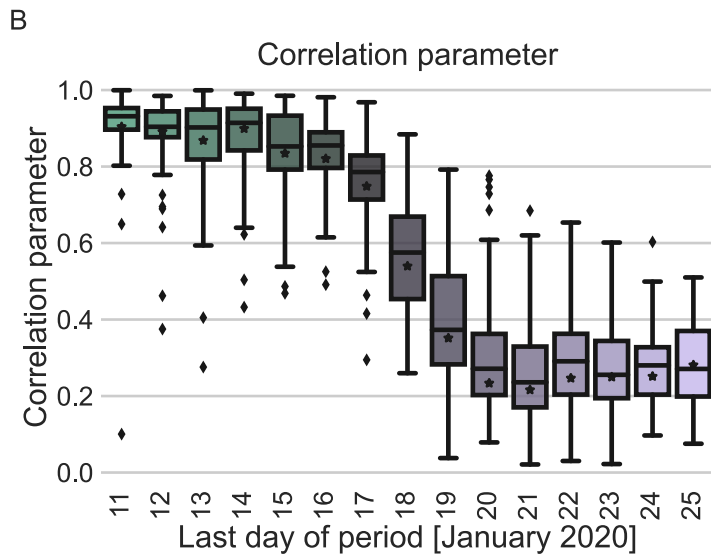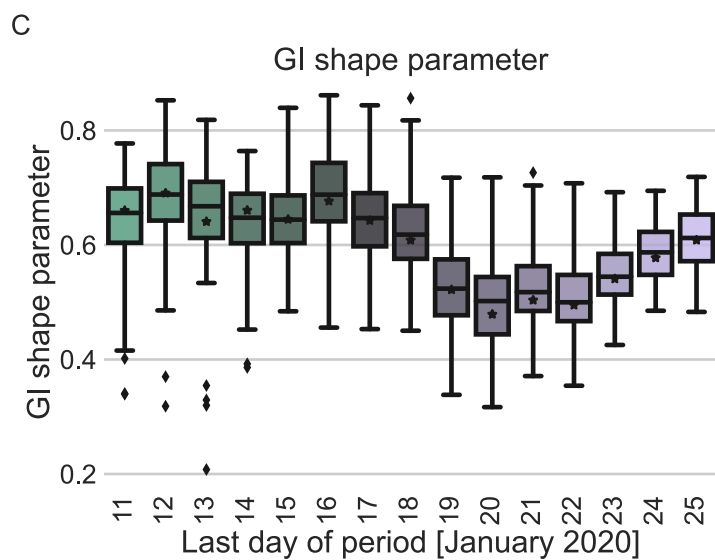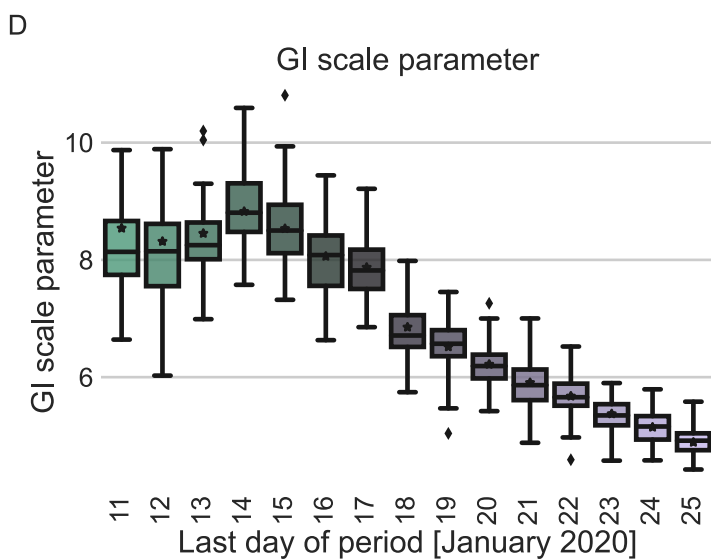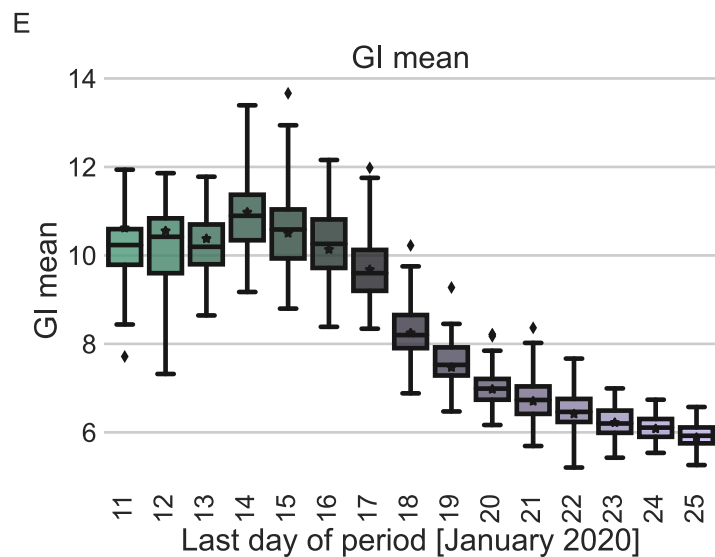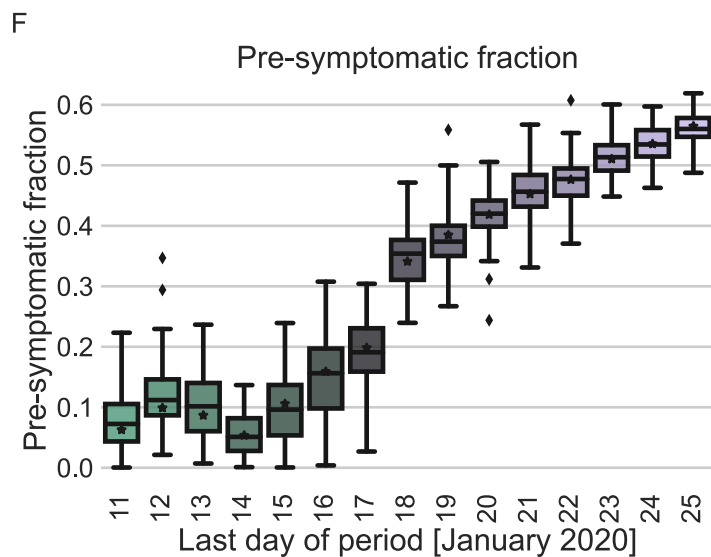

Supplement: supp [file elife_poa_e79134_Figure_5_figure_supplement_1.pdf › elife_poa_e79134_Figure_5_figure_supplement_1.pdf]

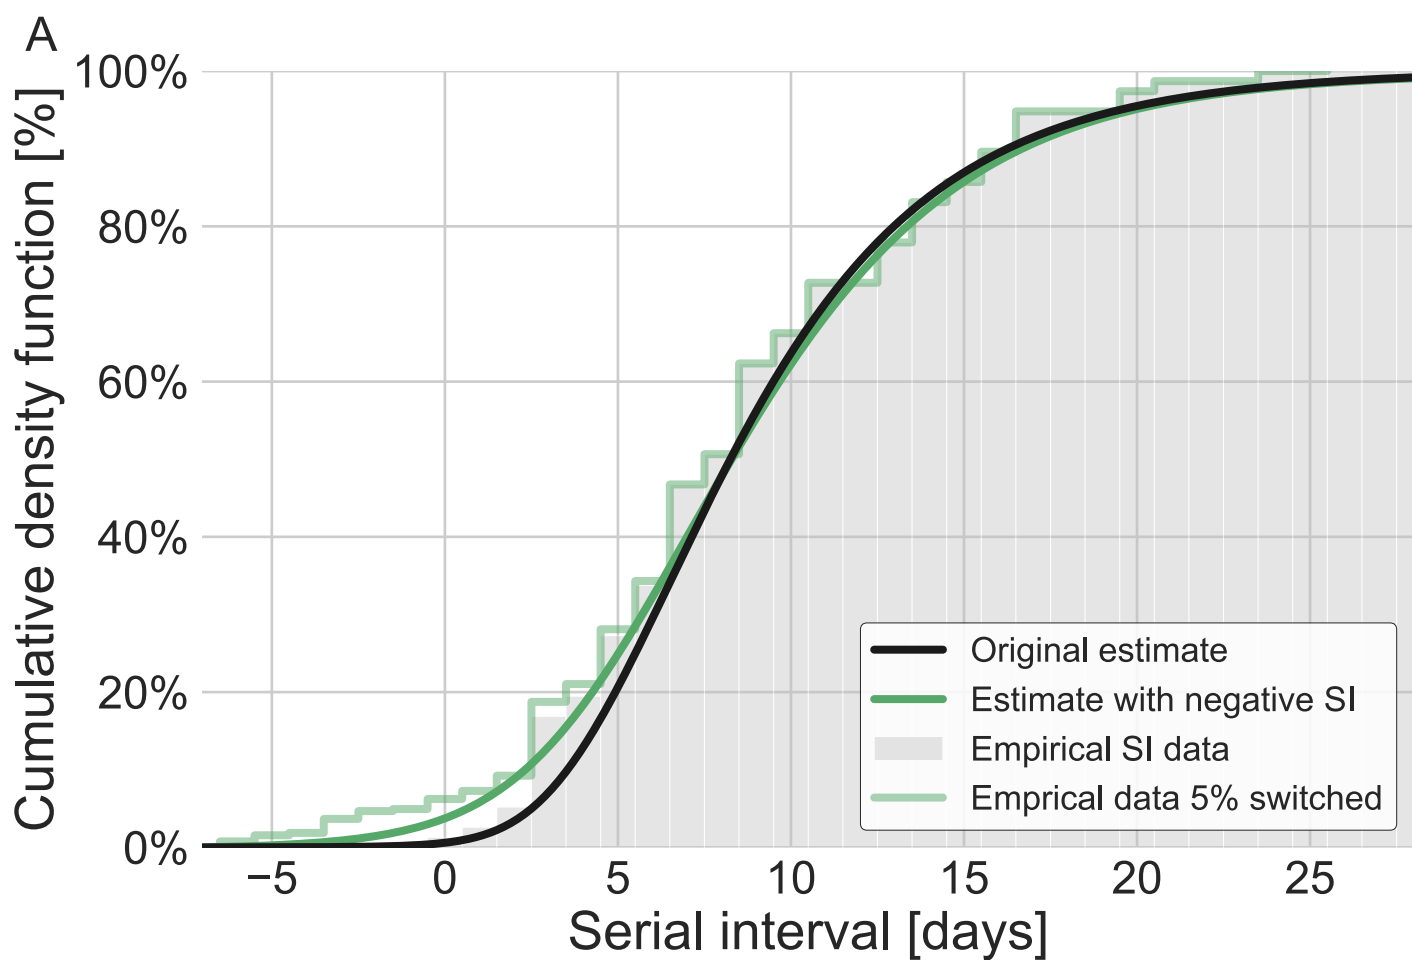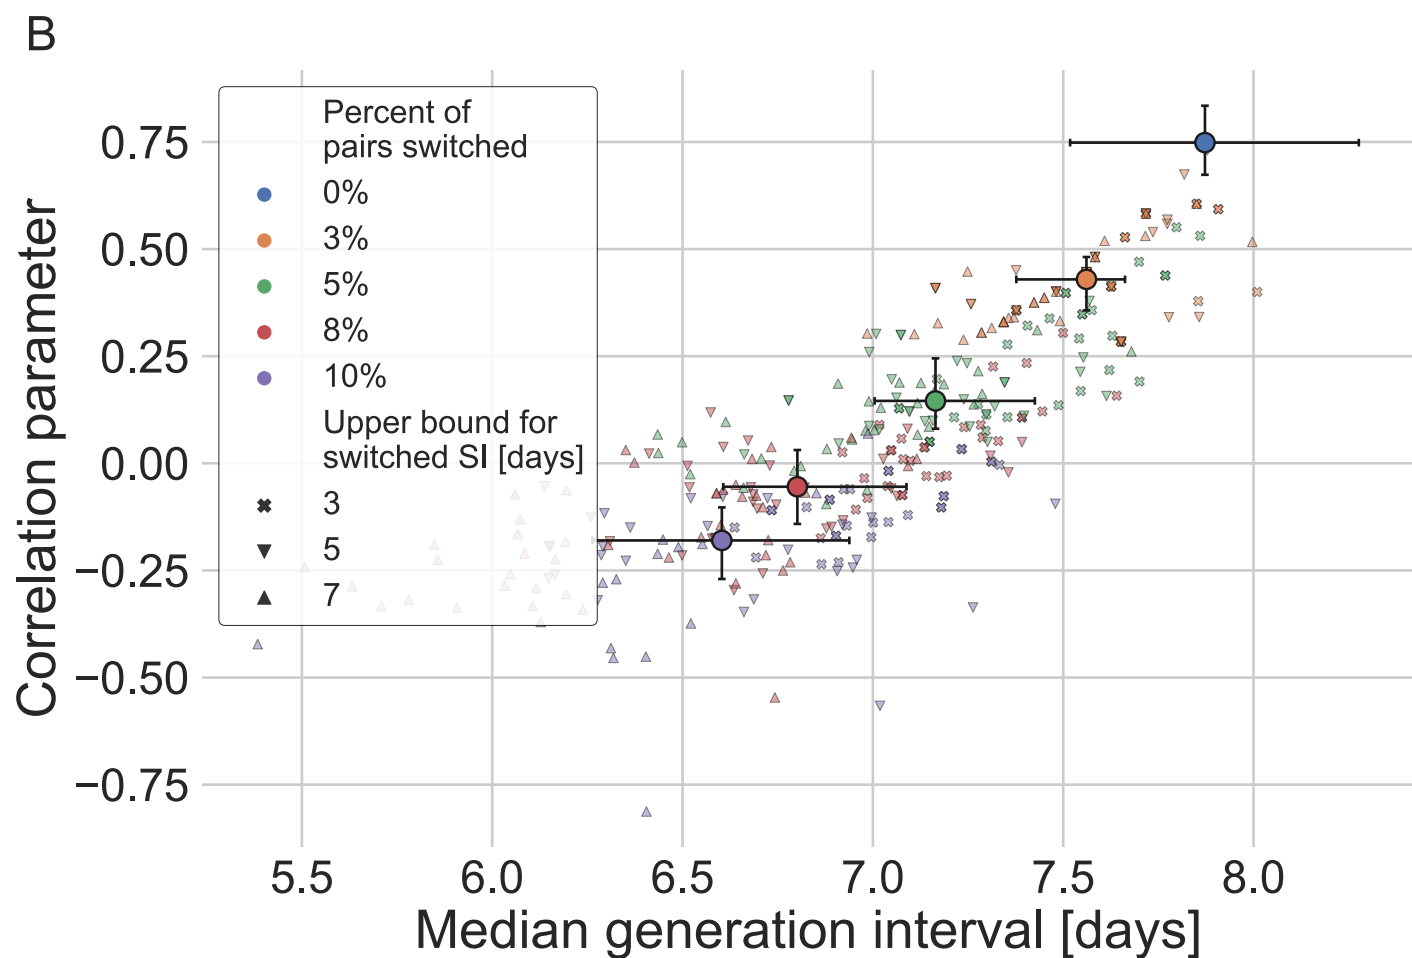

Supplement: supp [file elife_poa_e79134_Figure_5_figure_supplement_2.pdf › elife_poa_e79134_Figure_5_figure_supplement_2.pdf]

A

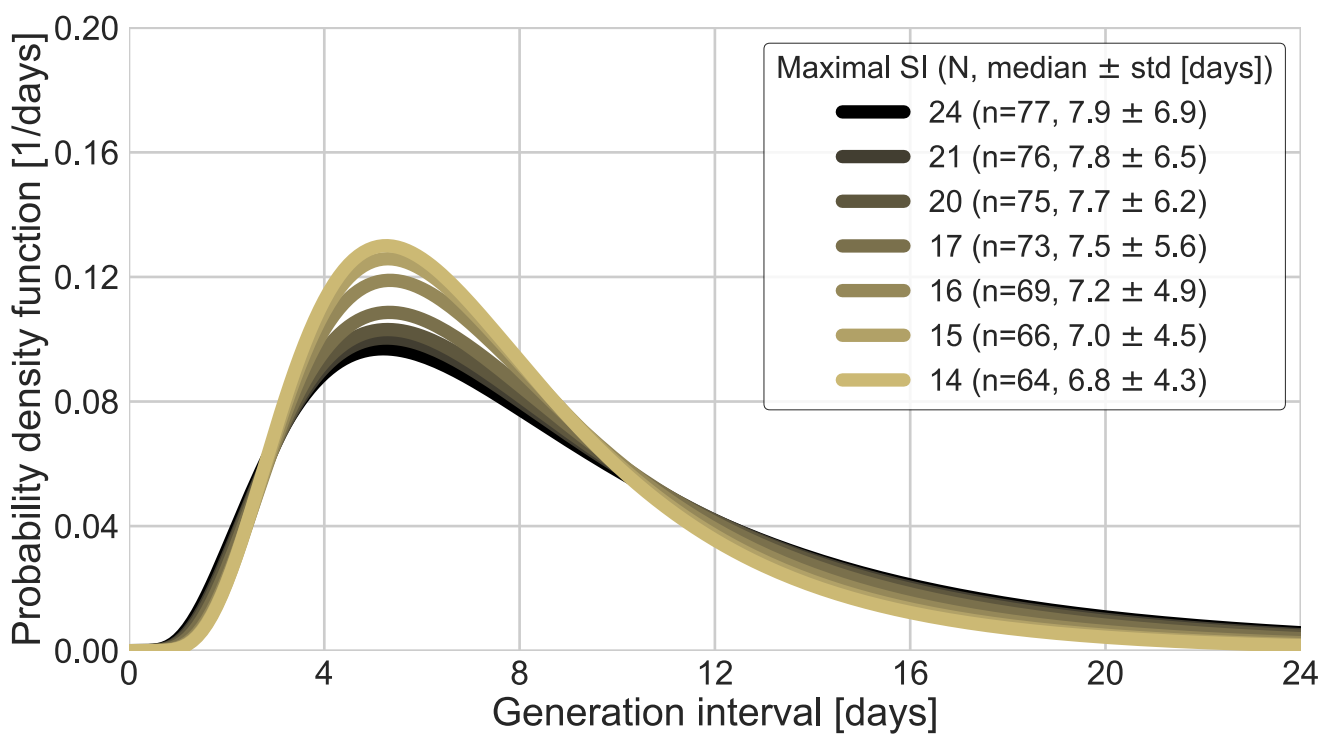

B

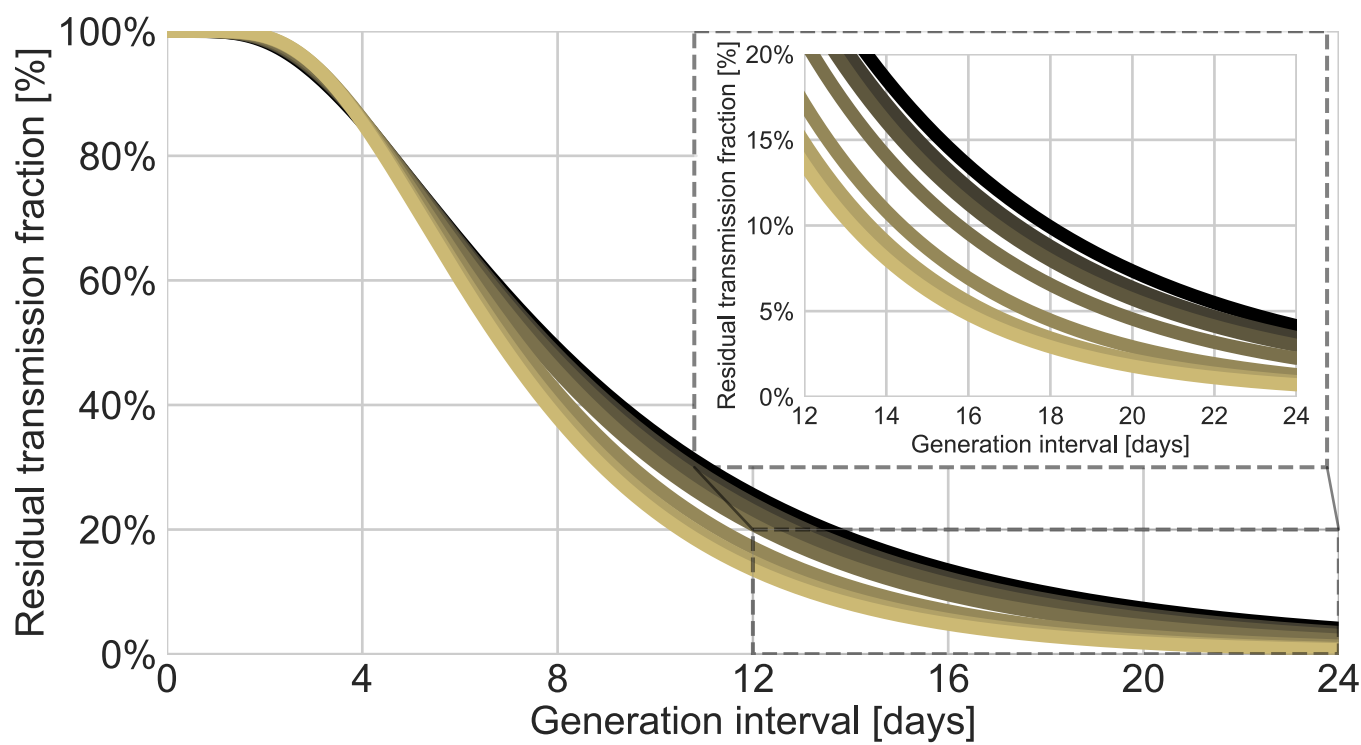

Supplement: supp [file elife_poa_e79134_Figure_5_figure_supplement_3.pdf › elife_poa_e79134_Figure_5_figure_supplement_3.pdf]

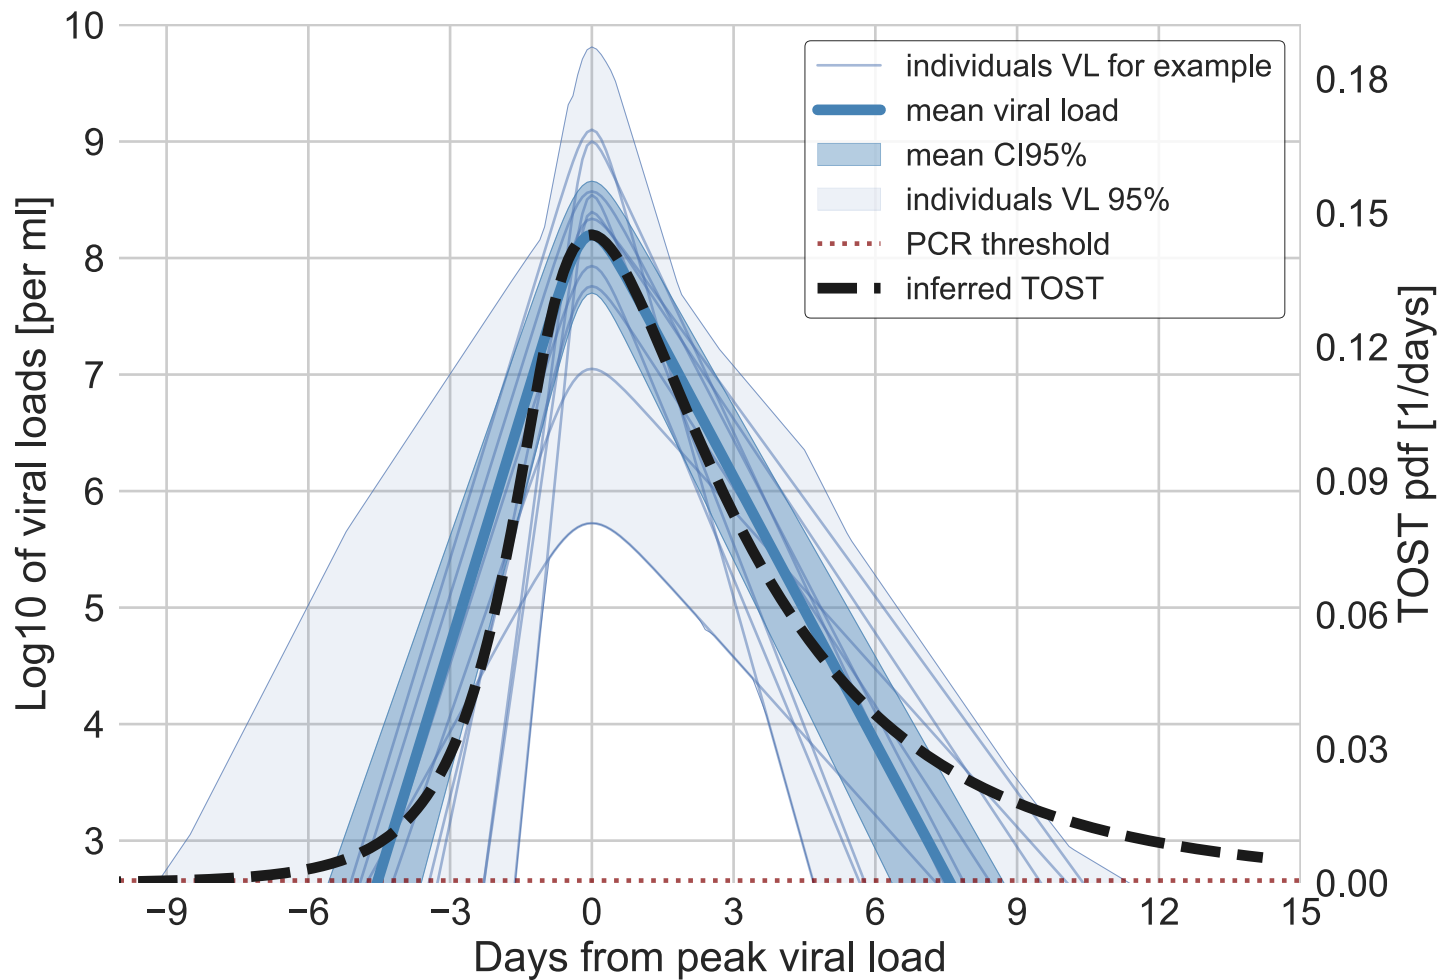

Supplement: supp [file elife_poa_e79134_Figure_6_figure_supplement_1.pdf › elife_poa_e79134_Figure_6_figure_supplement_1.pdf]

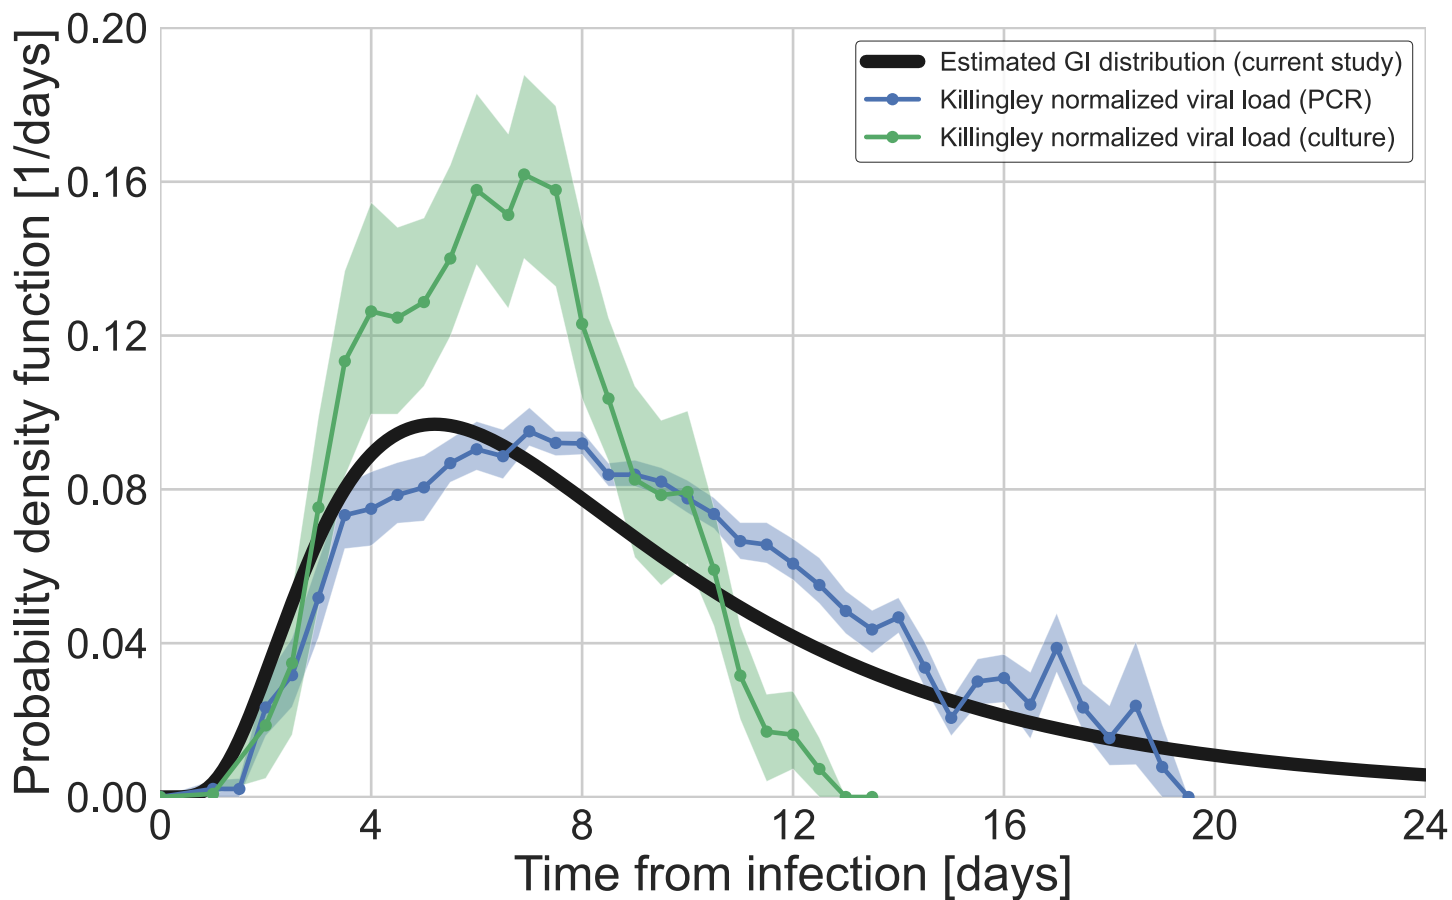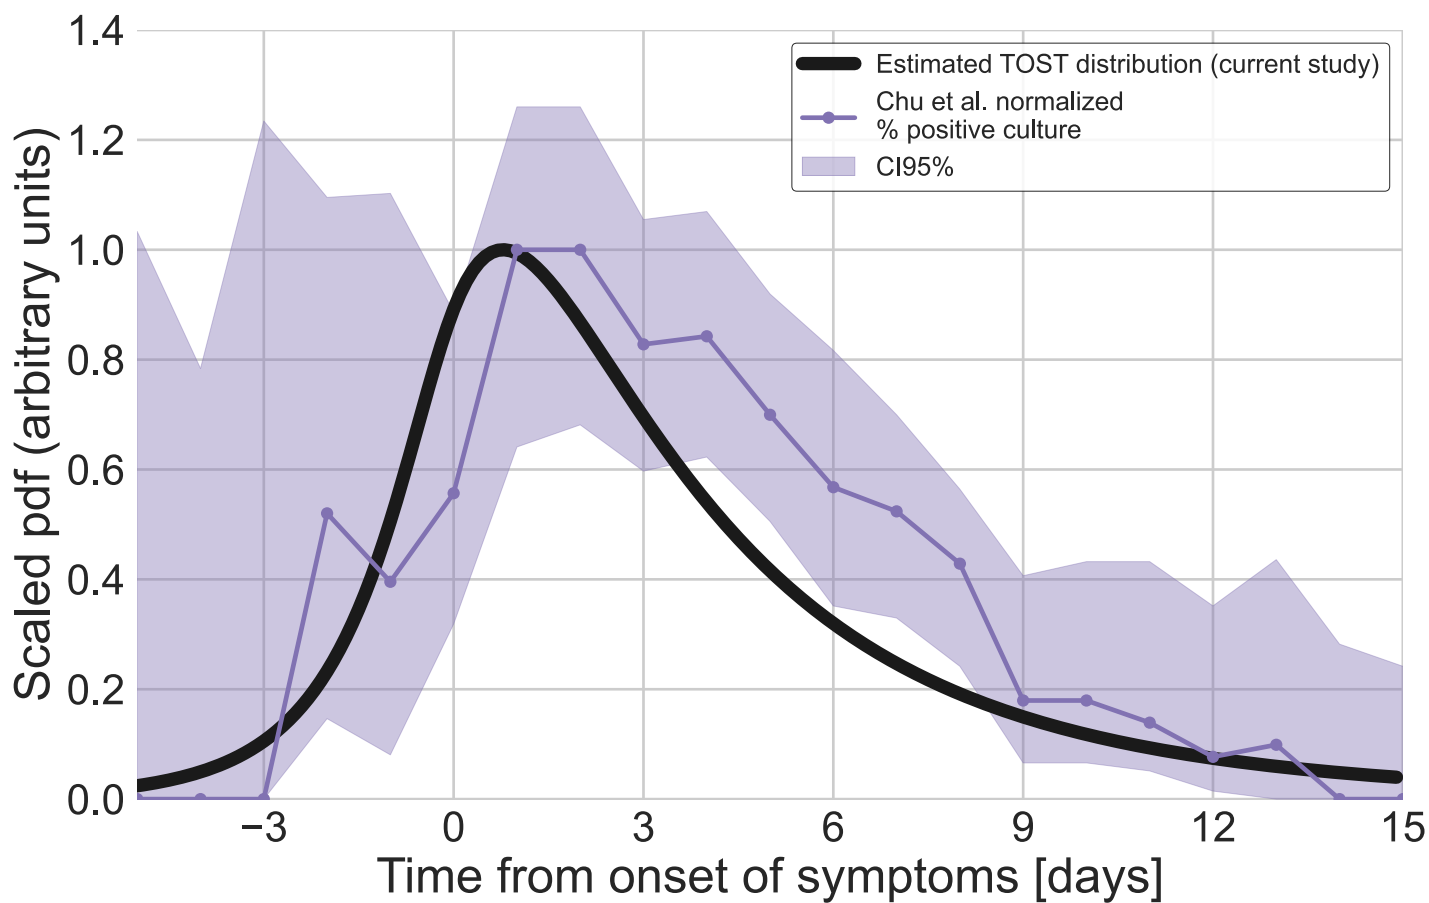

Supplement: supp [file elife_poa_e79134_Figure_6_figure_supplement_2.pdf › elife_poa_e79134_Figure_6_figure_supplement_2.pdf]
